# Supplementary material
Source: publisher site journal article supplement (https://www.dovepress.com/get_supplementary_file.php?f=supplementary_file_9_51969.pdf)
Supplement: Supplementary file 1 [file get_supplementary_file.php]

**Table S9. Identification of putative miR-622 target sites predicted by TargetScan**

| Target gene | Representative transcript | Gene name                                                                                                       | Conserved sites |      |         |         | Poorly conserved sites |      |         |         | Representative miRNA | Total context+ score | Aggregate PCT | Links to sites in UTRs |
|-------------|---------------------------|-----------------------------------------------------------------------------------------------------------------|-----------------|------|---------|---------|------------------------|------|---------|---------|----------------------|----------------------|---------------|------------------------|
|             |                           |                                                                                                                 | total           | 8mer | 7mer-m8 | 7mer-1A | total                  | 8mer | 7mer-m8 | 7mer-1A |                      |                      |               |                        |
| INSIG2      | NM_016133                 | insulin induced gene 2                                                                                          | 1               | 1    | 0       | 0       | 1                      | 0    | 1       | 0       | hsa-miR-622          | -0.68                | N/A           | Sites in UTR           |
| SMARCAD1    | NM_001128429              | SWI/SNF-related, matrix-associated actin-dependent regulator of chromatin, subfamily a, containing DEAD/H box 1 | 0               | 0    | 0       | 0       | 3                      | 2    | 0       | 1       | hsa-miR-622          | -0.62                | N/A           | Sites in UTR           |
| ANKS1A      | NM_015245                 | ankyrin repeat and sterile alpha motif domain containing 1A                                                     | 2               | 1    | 0       | 1       | 0                      | 0    | 0       | 0       | hsa-miR-622          | -0.6                 | N/A           | Sites in UTR           |
| CASR        | NM_000388                 | calcium-sensing receptor                                                                                        | 0               | 0    | 0       | 0       | 2                      | 2    | 0       | 0       | hsa-miR-622          | -0.59                | N/A           | Sites in UTR           |
| USP44       | NM_001042403              | ubiquitin specific peptidase 44                                                                                 | 0               | 0    | 0       | 0       | 2                      | 1    | 0       | 1       | hsa-miR-622          | -0.56                | N/A           | Sites in UTR           |
| TMEM14C     | NM_001165258              | transmembrane protein 14C                                                                                       | 0               | 0    | 0       | 0       | 2                      | 1    | 0       | 1       | hsa-miR-622          | -0.55                | N/A           | Sites in UTR           |
| CCNJ        | NM_001134375              | cyclin J                                                                                                        | 0               | 0    | 0       | 0       | 3                      | 0    | 2       | 1       | hsa-miR-622          | -0.54                | N/A           | Sites in UTR           |
| LRRC27      | NM_001143757              | leucine rich repeat containing 27                                                                               | 0               | 0    | 0       | 0       | 2                      | 2    | 0       | 0       | hsa-miR-622          | -0.54                | N/A           | Sites in UTR           |
| ATF2        | NM_001880                 | activating transcription factor 2                                                                               | 0               | 0    | 0       | 0       | 2                      | 1    | 0       | 1       | hsa-miR-622          | -0.53                | N/A           | Sites in UTR           |
| FAM104A     | NM_001098832              | family with sequence similarity 104, member A                                                                   | 0               | 0    | 0       | 0       | 2                      | 1    | 1       | 0       | hsa-miR-622          | -0.53                | N/A           | Sites in UTR           |
| DCUN1D1     | NM_020640                 | DCN1, defective in cullin neddylation 1, domain containing 1 ( <i>S. cerevisiae</i> )                           | 0               | 0    | 0       | 0       | 2                      | 1    | 0       | 1       | hsa-miR-622          | -0.52                | N/A           | Sites in UTR           |
| C3orf23     | NM_001029839              | chromosome 3 open reading frame 23                                                                              | 0               | 0    | 0       | 0       | 2                      | 1    | 0       | 1       | hsa-miR-622          | -0.52                | N/A           | Sites in UTR           |
| DSEL        | NM_032160                 | dermatan sulfate epimerase-like                                                                                 | 1               | 0    | 1       | 0       | 2                      | 1    | 0       | 1       | hsa-miR-622          | -0.52                | N/A           | Sites in UTR           |
| ROCK2       | NM_004850                 | Rho-associated, coiled-coil containing protein kinase 2                                                         | 1               | 0    | 0       | 1       | 2                      | 0    | 1       | 1       | hsa-miR-622          | -0.51                | N/A           | Sites in UTR           |
| ELOVL2      | NM_017770                 | ELOVL fatty acid elongase 2                                                                                     | 1               | 0    | 0       | 1       | 2                      | 1    | 1       | 0       | hsa-miR-622          | -0.51                | N/A           | Sites in UTR           |

|         |              |                                                                                               |   |   |   |   |   |   |   |   |             |       |     |              |
|---------|--------------|-----------------------------------------------------------------------------------------------|---|---|---|---|---|---|---|---|-------------|-------|-----|--------------|
| CSRN3   | NM_001172173 | cysteine-serine-rich nuclear protein 3                                                        | 1 | 0 | 1 | 0 | 1 | 0 | 1 | 0 | hsa-miR-622 | -0.51 | N/A | Sites in UTR |
| AGPAT4  | NM_020133    | 1-acylglycerol-3-phosphate O-acyltransferase 4 (lysophosphatidic acid acyltransferase, delta) | 0 | 0 | 0 | 0 | 3 | 1 | 2 | 0 | hsa-miR-622 | -0.5  | N/A | Sites in UTR |
| CD247   | NM_000734    | CD247 molecule                                                                                | 0 | 0 | 0 | 0 | 2 | 1 | 1 | 0 | hsa-miR-622 | -0.5  | N/A | Sites in UTR |
| SYNM    | NM_015286    | synemin, intermediate filament protein                                                        | 0 | 0 | 0 | 0 | 5 | 0 | 5 | 0 | hsa-miR-622 | -0.5  | N/A | Sites in UTR |
| JRKL    | NM_003772    | jerky homolog-like (mouse)                                                                    | 0 | 0 | 0 | 0 | 2 | 1 | 0 | 1 | hsa-miR-622 | -0.49 | N/A | Sites in UTR |
| ZDHHC3  | NM_001135179 | zinc finger, DHHC-type containing 3                                                           | 0 | 0 | 0 | 0 | 5 | 3 | 1 | 1 | hsa-miR-622 | -0.48 | N/A | Sites in UTR |
| FDX1    | NM_004109    | ferredoxin 1                                                                                  | 0 | 0 | 0 | 0 | 2 | 1 | 1 | 0 | hsa-miR-622 | -0.48 | N/A | Sites in UTR |
| CLPB    | NM_030813    | ClpB caseinolytic peptidase B homolog (E. coli)                                               | 0 | 0 | 0 | 0 | 2 | 2 | 0 | 0 | hsa-miR-622 | -0.48 | N/A | Sites in UTR |
| LONRF2  | NM_198461    | LON peptidase N-terminal domain and ring finger 2                                             | 0 | 0 | 0 | 0 | 3 | 1 | 0 | 2 | hsa-miR-622 | -0.48 | N/A | Sites in UTR |
| CYBASC3 | NM_001161452 | cytochrome b, ascorbate dependent 3                                                           | 0 | 0 | 0 | 0 | 2 | 1 | 1 | 0 | hsa-miR-622 | -0.47 | N/A | Sites in UTR |
| EYA1    | NM_000503    | eyes absent homolog 1 (Drosophila)                                                            | 1 | 1 | 0 | 0 | 1 | 0 | 0 | 1 | hsa-miR-622 | -0.47 | N/A | Sites in UTR |
| VIPAR   | NM_001193314 | VPS33B interacting protein, apical-basolateral polarity regulator                             | 1 | 1 | 0 | 0 | 1 | 0 | 1 | 0 | hsa-miR-622 | -0.47 | N/A | Sites in UTR |
| SLC5A3  | NM_006933    | solute carrier family 5 (sodium/myo-inositol cotransporter), member 3                         | 1 | 1 | 0 | 0 | 1 | 0 | 1 | 0 | hsa-miR-622 | -0.46 | N/A | Sites in UTR |
| TTC30A  | NM_152275    | tetratricopeptide repeat domain 30A                                                           | 0 | 0 | 0 | 0 | 1 | 1 | 0 | 0 | hsa-miR-622 | -0.46 | N/A | Sites in UTR |
| LMO2    | NM_001142315 | LIM domain only 2 (rhombotin-like 1)                                                          | 0 | 0 | 0 | 0 | 1 | 1 | 0 | 0 | hsa-miR-622 | -0.46 | N/A | Sites in UTR |
| RILPL1  | NM_178314    | Rab interacting lysosomal protein-like 1                                                      | 0 | 0 | 0 | 0 | 2 | 1 | 1 | 0 | hsa-miR-622 | -0.46 | N/A | Sites in UTR |
| BCL10   | NM_003921    | B-cell CLL/lymphoma 10                                                                        | 0 | 0 | 0 | 0 | 2 | 0 | 1 | 1 | hsa-miR-622 | -0.45 | N/A | Sites in UTR |
| PPP1R2  | NM_006241    | protein phosphatase 1, regulatory (inhibitor) subunit 2                                       | 0 | 0 | 0 | 0 | 3 | 0 | 0 | 3 | hsa-miR-622 | -0.45 | N/A | Sites in UTR |

|           |              |                                                                     |   |   |   |   |   |   |   |   |             |       |     |              |
|-----------|--------------|---------------------------------------------------------------------|---|---|---|---|---|---|---|---|-------------|-------|-----|--------------|
| PGD       | NM_002631    | phosphogluconate dehydrogenase                                      | 0 | 0 | 0 | 0 | 1 | 1 | 0 | 0 | hsa-miR-622 | -0.45 | N/A | Sites in UTR |
| USP9X     | NM_001039590 | ubiquitin specific peptidase 9, X-linked                            | 1 | 1 | 0 | 0 | 1 | 0 | 0 | 1 | hsa-miR-622 | -0.45 | N/A | Sites in UTR |
| ISY1      | NM_001199469 | ISY1 splicing factor homolog ( <i>S. cerevisiae</i> )               | 0 | 0 | 0 | 0 | 3 | 2 | 1 | 0 | hsa-miR-622 | -0.45 | N/A | Sites in UTR |
| CDK9      | NM_001261    | cyclin-dependent kinase 9                                           | 0 | 0 | 0 | 0 | 2 | 1 | 1 | 0 | hsa-miR-622 | -0.44 | N/A | Sites in UTR |
| DDX51     | NM_175066    | DEAD (Asp-Glu-Ala-Asp) box polypeptide 51                           | 0 | 0 | 0 | 0 | 3 | 2 | 1 | 0 | hsa-miR-622 | -0.44 | N/A | Sites in UTR |
| STX18     | NM_016930    | syntaxin 18                                                         | 0 | 0 | 0 | 0 | 2 | 1 | 1 | 0 | hsa-miR-622 | -0.44 | N/A | Sites in UTR |
| DOT1L     | NM_032482    | DOT1-like, histone H3 methyltransferase ( <i>S. cerevisiae</i> )    | 0 | 0 | 0 | 0 | 3 | 1 | 2 | 0 | hsa-miR-622 | -0.44 | N/A | Sites in UTR |
| PDE11A    | NM_001077196 | phosphodiesterase 11A                                               | 0 | 0 | 0 | 0 | 4 | 1 | 2 | 1 | hsa-miR-622 | -0.44 | N/A | Sites in UTR |
| TP53INP1  | NM_001135733 | tumor protein p53 inducible nuclear protein 1                       | 1 | 1 | 0 | 0 | 1 | 0 | 0 | 1 | hsa-miR-622 | -0.43 | N/A | Sites in UTR |
| CACNG2    | NM_006078    | calcium channel, voltage-dependent, gamma subunit 2                 | 1 | 0 | 1 | 0 | 1 | 1 | 0 | 0 | hsa-miR-622 | -0.43 | N/A | Sites in UTR |
| SUSD4     | NM_017982    | sushi domain containing 4                                           | 1 | 1 | 0 | 0 | 0 | 0 | 0 | 0 | hsa-miR-622 | -0.43 | N/A | Sites in UTR |
| KHDRBS2   | NM_152688    | KH domain containing, RNA binding, signal transduction associated 2 | 0 | 0 | 0 | 0 | 1 | 1 | 0 | 0 | hsa-miR-622 | -0.43 | N/A | Sites in UTR |
| PKHD1     | NM_138694    | polycystic kidney and hepatic disease 1 (autosomal recessive)       | 0 | 0 | 0 | 0 | 1 | 1 | 0 | 0 | hsa-miR-622 | -0.43 | N/A | Sites in UTR |
| RPS29     | NM_001030001 | ribosomal protein S29                                               | 0 | 0 | 0 | 0 | 1 | 1 | 0 | 0 | hsa-miR-622 | -0.42 | N/A | Sites in UTR |
| DUS4L     | NM_181581    | dihydrouridine synthase 4-like ( <i>S. cerevisiae</i> )             | 0 | 0 | 0 | 0 | 1 | 1 | 0 | 0 | hsa-miR-622 | -0.42 | N/A | Sites in UTR |
| E2F8      | NM_024680    | E2F transcription factor 8                                          | 0 | 0 | 0 | 0 | 1 | 1 | 0 | 0 | hsa-miR-622 | -0.42 | N/A | Sites in UTR |
| ERP29     | NM_001034025 | endoplasmic reticulum protein 29                                    | 0 | 0 | 0 | 0 | 1 | 1 | 0 | 0 | hsa-miR-622 | -0.42 | N/A | Sites in UTR |
| HIST2H2BE | NM_003528    | histone cluster 2, H2be                                             | 0 | 0 | 0 | 0 | 1 | 1 | 0 | 0 | hsa-miR-622 | -0.41 | N/A | Sites in UTR |

|          |              |                                                                                                  |   |   |   |   |   |   |   |   |             |       |     |              |
|----------|--------------|--------------------------------------------------------------------------------------------------|---|---|---|---|---|---|---|---|-------------|-------|-----|--------------|
| IL22RA2  | NM_052962    | interleukin 22 receptor, alpha 2                                                                 | 0 | 0 | 0 | 0 | 2 | 1 | 0 | 1 | hsa-miR-622 | -0.41 | N/A | Sites in UTR |
| BOD1     | NM_001159651 | biorientation of chromosomes in cell division 1                                                  | 0 | 0 | 0 | 0 | 1 | 1 | 0 | 0 | hsa-miR-622 | -0.41 | N/A | Sites in UTR |
| RPP14    | NM_001098783 | ribonuclease P/MRP 14kDa subunit                                                                 | 1 | 0 | 0 | 1 | 1 | 1 | 0 | 0 | hsa-miR-622 | -0.41 | N/A | Sites in UTR |
| GALNT10  | NM_198321    | UDP-N-acetyl-alpha-D-galactosamine:polypeptide N-acetylgalactosaminyltransferase 10 (GalNAc-T10) | 0 | 0 | 0 | 0 | 4 | 1 | 1 | 2 | hsa-miR-622 | -0.41 | N/A | Sites in UTR |
| SAA2     | NM_001127380 | serum amyloid A2                                                                                 | 0 | 0 | 0 | 0 | 2 | 1 | 0 | 1 | hsa-miR-622 | -0.41 | N/A | Sites in UTR |
| TMEM14B  | NM_001127711 | transmembrane protein 14B                                                                        | 0 | 0 | 0 | 0 | 1 | 1 | 0 | 0 | hsa-miR-622 | -0.41 | N/A | Sites in UTR |
| AMPH     | NM_001635    | amphiphysin                                                                                      | 0 | 0 | 0 | 0 | 1 | 1 | 0 | 0 | hsa-miR-622 | -0.41 | N/A | Sites in UTR |
| WBP2NL   | NM_152613    | WBP2 N-terminal like                                                                             | 1 | 1 | 0 | 0 | 0 | 0 | 0 | 0 | hsa-miR-622 | -0.41 | N/A | Sites in UTR |
| MORC3    | NM_015358    | MORC family CW-type zinc finger 3                                                                | 0 | 0 | 0 | 0 | 1 | 1 | 0 | 0 | hsa-miR-622 | -0.4  | N/A | Sites in UTR |
| KCNB1    | NM_004975    | potassium voltage-gated channel, Shab-related subfamily, member 1                                | 1 | 1 | 0 | 0 | 0 | 0 | 0 | 0 | hsa-miR-622 | -0.4  | N/A | Sites in UTR |
| ZBTB5    | NM_014872    | zinc finger and BTB domain containing 5                                                          | 0 | 0 | 0 | 0 | 1 | 1 | 0 | 0 | hsa-miR-622 | -0.4  | N/A | Sites in UTR |
| ELF1     | NM_001145353 | E74-like factor 1 (ets domain transcription factor)                                              | 0 | 0 | 0 | 0 | 1 | 1 | 0 | 0 | hsa-miR-622 | -0.4  | N/A | Sites in UTR |
| PPARD    | NM_001171818 | peroxisome proliferator-activated receptor delta                                                 | 1 | 1 | 0 | 0 | 0 | 0 | 0 | 0 | hsa-miR-622 | -0.4  | N/A | Sites in UTR |
| GPATCH1  | NM_018025    | G patch domain containing 1                                                                      | 0 | 0 | 0 | 0 | 1 | 1 | 0 | 0 | hsa-miR-622 | -0.4  | N/A | Sites in UTR |
| MIER1    | NM_001077700 | mesoderm induction early response 1 homolog (Xenopus laevis)                                     | 0 | 0 | 0 | 0 | 1 | 1 | 0 | 0 | hsa-miR-622 | -0.4  | N/A | Sites in UTR |
| APOBEC3A | NM_145699    | apolipoprotein B mRNA editing enzyme, catalytic polypeptide-like 3A                              | 0 | 0 | 0 | 0 | 1 | 1 | 0 | 0 | hsa-miR-622 | -0.4  | N/A | Sites in UTR |
| LRRC61   | NM_001142928 | leucine rich repeat containing 61                                                                | 0 | 0 | 0 | 0 | 2 | 1 | 1 | 0 | hsa-miR-622 | -0.4  | N/A | Sites in UTR |
| TTC22    | NM_017904    | tetratricopeptide repeat domain 22                                                               | 0 | 0 | 0 | 0 | 2 | 1 | 0 | 1 | hsa-miR-622 | -0.4  | N/A | Sites in UTR |

|         |              |                                                                                           |   |   |   |   |   |   |   |   |             |       |     |              |
|---------|--------------|-------------------------------------------------------------------------------------------|---|---|---|---|---|---|---|---|-------------|-------|-----|--------------|
| LMAN1   | NM_005570    | lectin, mannose-binding, 1                                                                | 0 | 0 | 0 | 0 | 2 | 1 | 1 | 0 | hsa-miR-622 | -0.4  | N/A | Sites in UTR |
| FRAS1   | NM_025074    | Fraser syndrome 1                                                                         | 1 | 1 | 0 | 0 | 2 | 0 | 0 | 2 | hsa-miR-622 | -0.4  | N/A | Sites in UTR |
| APPL1   | NM_012096    | adaptor protein, phosphotyrosine interaction, PH domain and leucine zipper containing 1   | 1 | 1 | 0 | 0 | 1 | 0 | 1 | 0 | hsa-miR-622 | -0.4  | N/A | Sites in UTR |
| NPM1    | NM_001037738 | nucleophosmin (nucleolar phosphoprotein B23, numatrin)                                    | 0 | 0 | 0 | 0 | 1 | 1 | 0 | 0 | hsa-miR-622 | -0.4  | N/A | Sites in UTR |
| PRKAR2B | NM_002736    | protein kinase, cAMP-dependent, regulatory, type II, beta                                 | 0 | 0 | 0 | 0 | 1 | 1 | 0 | 0 | hsa-miR-622 | -0.4  | N/A | Sites in UTR |
| EIF1AX  | NM_001412    | eukaryotic translation initiation factor 1A, X-linked                                     | 1 | 1 | 0 | 0 | 0 | 0 | 0 | 0 | hsa-miR-622 | -0.39 | N/A | Sites in UTR |
| MBD1    | NM_001204137 | methyl-CpG binding domain protein 1                                                       | 0 | 0 | 0 | 0 | 2 | 0 | 2 | 0 | hsa-miR-622 | -0.39 | N/A | Sites in UTR |
| HOXA9   | NM_152739    | homeobox A9                                                                               | 0 | 0 | 0 | 0 | 1 | 1 | 0 | 0 | hsa-miR-622 | -0.39 | N/A | Sites in UTR |
| YTHDF1  | NM_017798    | YTH domain family, member 1                                                               | 1 | 1 | 0 | 0 | 0 | 0 | 0 | 0 | hsa-miR-622 | -0.39 | N/A | Sites in UTR |
| SFXN1   | NM_022754    | sideroflexin 1                                                                            | 1 | 1 | 0 | 0 | 0 | 0 | 0 | 0 | hsa-miR-622 | -0.39 | N/A | Sites in UTR |
| KCNN3   | NM_001204087 | potassium intermediate/small conductance calcium-activated channel, subfamily N, member 3 | 0 | 0 | 0 | 0 | 3 | 2 | 1 | 0 | hsa-miR-622 | -0.39 | N/A | Sites in UTR |
| 1-Mar   | NM_001166373 | membrane-associated ring finger (C3HC4) 1                                                 | 0 | 0 | 0 | 0 | 3 | 1 | 0 | 2 | hsa-miR-622 | -0.39 | N/A | Sites in UTR |
| CNIH3   | NM_152495    | cornichon homolog 3 (Drosophila)                                                          | 0 | 0 | 0 | 0 | 2 | 1 | 0 | 1 | hsa-miR-622 | -0.39 | N/A | Sites in UTR |
| NDST1   | NM_001543    | N-deacetylase/N-sulfotransferase (heparan glucosaminyl) 1                                 | 1 | 1 | 0 | 0 | 2 | 0 | 1 | 1 | hsa-miR-622 | -0.39 | N/A | Sites in UTR |
| SLFN5   | NM_144975    | schlafen family member 5                                                                  | 0 | 0 | 0 | 0 | 2 | 0 | 2 | 0 | hsa-miR-622 | -0.39 | N/A | Sites in UTR |
| F2RL2   | NM_004101    | coagulation factor II (thrombin) receptor-like 2                                          | 0 | 0 | 0 | 0 | 3 | 1 | 1 | 1 | hsa-miR-622 | -0.39 | N/A | Sites in UTR |
| MBTPS1  | NM_003791    | membrane-bound transcription factor peptidase, site 1                                     | 0 | 0 | 0 | 0 | 1 | 1 | 0 | 0 | hsa-miR-622 | -0.39 | N/A | Sites in UTR |
| FAM72A  | NM_001123168 | family with sequence similarity 72, member A                                              | 1 | 1 | 0 | 0 | 0 | 0 | 0 | 0 | hsa-miR-622 | -0.39 | N/A | Sites in UTR |

|         |              |                                                             |   |   |   |   |   |   |   |   |             |       |     |              |
|---------|--------------|-------------------------------------------------------------|---|---|---|---|---|---|---|---|-------------|-------|-----|--------------|
| TBC1D5  | NM_001134380 | TBC1 domain family, member 5                                | 0 | 0 | 0 | 0 | 3 | 1 | 2 | 0 | hsa-miR-622 | -0.39 | N/A | Sites in UTR |
| BNIP3   | NM_004052    | BCL2/adenovirus E1B 19kDa interacting protein 3             | 0 | 0 | 0 | 0 | 1 | 1 | 0 | 0 | hsa-miR-622 | -0.39 | N/A | Sites in UTR |
| TRAPPC8 | NM_014939    | trafficking protein particle complex 8                      | 0 | 0 | 0 | 0 | 2 | 1 | 1 | 0 | hsa-miR-622 | -0.39 | N/A | Sites in UTR |
| BTK     | NM_000061    | Bruton agammaglobulinemia tyrosine kinase                   | 1 | 1 | 0 | 0 | 0 | 0 | 0 | 0 | hsa-miR-622 | -0.39 | N/A | Sites in UTR |
| LAMA2   | NM_000426    | laminin, alpha 2                                            | 0 | 0 | 0 | 0 | 1 | 1 | 0 | 0 | hsa-miR-622 | -0.39 | N/A | Sites in UTR |
| RILPL2  | NM_145058    | Rab interacting lysosomal protein-like 2                    | 0 | 0 | 0 | 0 | 2 | 1 | 0 | 1 | hsa-miR-622 | -0.38 | N/A | Sites in UTR |
| TRUB2   | NM_015679    | TruB pseudouridine (psi) synthase homolog 2 (E. coli)       | 1 | 1 | 0 | 0 | 0 | 0 | 0 | 0 | hsa-miR-622 | -0.38 | N/A | Sites in UTR |
| N6AMT1  | NM_013240    | N-6 adenine-specific DNA methyltransferase 1 (putative)     | 0 | 0 | 0 | 0 | 3 | 1 | 1 | 1 | hsa-miR-622 | -0.38 | N/A | Sites in UTR |
| USP48   | NM_032236    | ubiquitin specific peptidase 48                             | 0 | 0 | 0 | 0 | 1 | 1 | 0 | 0 | hsa-miR-622 | -0.38 | N/A | Sites in UTR |
| NUAK1   | NM_014840    | NUAK family, SNF1-like kinase, 1                            | 0 | 0 | 0 | 0 | 2 | 1 | 0 | 1 | hsa-miR-622 | -0.38 | N/A | Sites in UTR |
| G3BP1   | NM_005754    | GTPase activating protein (SH3 domain) binding protein 1    | 0 | 0 | 0 | 0 | 2 | 0 | 1 | 1 | hsa-miR-622 | -0.38 | N/A | Sites in UTR |
| RBP7    | NM_052960    | retinol binding protein 7, cellular                         | 0 | 0 | 0 | 0 | 1 | 1 | 0 | 0 | hsa-miR-622 | -0.38 | N/A | Sites in UTR |
| SPTY2D1 | NM_194285    | SPT2, Suppressor of Ty, domain containing 1 (S. cerevisiae) | 1 | 1 | 0 | 0 | 0 | 0 | 0 | 0 | hsa-miR-622 | -0.38 | N/A | Sites in UTR |
| PIWIL3  | NM_001008496 | piwi-like 3 (Drosophila)                                    | 0 | 0 | 0 | 0 | 1 | 1 | 0 | 0 | hsa-miR-622 | -0.38 | N/A | Sites in UTR |
| ZFYVE19 | NM_001077268 | zinc finger, FYVE domain containing 19                      | 1 | 1 | 0 | 0 | 1 | 0 | 1 | 0 | hsa-miR-622 | -0.38 | N/A | Sites in UTR |
| TXLNG   | NM_001168683 | taxilin gamma                                               | 1 | 0 | 1 | 0 | 1 | 1 | 0 | 0 | hsa-miR-622 | -0.38 | N/A | Sites in UTR |
| UBE2K   | NM_001111112 | ubiquitin-conjugating enzyme E2K                            | 1 | 0 | 0 | 1 | 2 | 1 | 1 | 0 | hsa-miR-622 | -0.38 | N/A | Sites in UTR |
| CDK8    | NM_001260    | cyclin-dependent kinase 8                                   | 1 | 1 | 0 | 0 | 0 | 0 | 0 | 0 | hsa-miR-622 | -0.37 | N/A | Sites in UTR |

|           |              |                                                                                             |   |   |   |   |   |   |   |   |             |       |     |              |
|-----------|--------------|---------------------------------------------------------------------------------------------|---|---|---|---|---|---|---|---|-------------|-------|-----|--------------|
| SP4       | NM_003112    | Sp4 transcription factor                                                                    | 0 | 0 | 0 | 0 | 1 | 1 | 0 | 0 | hsa-miR-622 | -0.37 | N/A | Sites in UTR |
| TTC17     | NM_018259    | tetratricopeptide repeat domain 17                                                          | 1 | 1 | 0 | 0 | 0 | 0 | 0 | 0 | hsa-miR-622 | -0.37 | N/A | Sites in UTR |
| MAPKAPK3  | NM_004635    | mitogen-activated protein kinase-activated protein kinase 3                                 | 0 | 0 | 0 | 0 | 1 | 1 | 0 | 0 | hsa-miR-622 | -0.37 | N/A | Sites in UTR |
| ST8SIA3   | NM_015879    | ST8 alpha-N-acetyl-neuraminide alpha-2,8-sialyltransferase 3                                | 0 | 0 | 0 | 0 | 2 | 1 | 0 | 1 | hsa-miR-622 | -0.37 | N/A | Sites in UTR |
| ADCYAP1R1 | NM_001118    | adenylate cyclase activating polypeptide 1 (pituitary) receptor type I                      | 0 | 0 | 0 | 0 | 3 | 0 | 3 | 0 | hsa-miR-622 | -0.37 | N/A | Sites in UTR |
| PRLR      | NM_000949    | prolactin receptor                                                                          | 0 | 0 | 0 | 0 | 2 | 1 | 0 | 1 | hsa-miR-622 | -0.37 | N/A | Sites in UTR |
| LRRC10    | NM_201550    | leucine rich repeat containing 10                                                           | 0 | 0 | 0 | 0 | 2 | 0 | 1 | 1 | hsa-miR-622 | -0.37 | N/A | Sites in UTR |
| FAM72B    | NM_001100910 | family with sequence similarity 72, member B                                                | 1 | 1 | 0 | 0 | 0 | 0 | 0 | 0 | hsa-miR-622 | -0.37 | N/A | Sites in UTR |
| FAM72D    | NM_207418    | family with sequence similarity 72, member D                                                | 1 | 1 | 0 | 0 | 0 | 0 | 0 | 0 | hsa-miR-622 | -0.37 | N/A | Sites in UTR |
| NAA25     | NM_024953    | N(alpha)-acetyltransferase 25, NatB auxiliary subunit                                       | 1 | 1 | 0 | 0 | 0 | 0 | 0 | 0 | hsa-miR-622 | -0.37 | N/A | Sites in UTR |
| AQP8      | NM_001169    | aquaporin 8                                                                                 | 0 | 0 | 0 | 0 | 2 | 1 | 0 | 1 | hsa-miR-622 | -0.37 | N/A | Sites in UTR |
| SKP1      | NM_006930    | S-phase kinase-associated protein 1                                                         | 0 | 0 | 0 | 0 | 1 | 1 | 0 | 0 | hsa-miR-622 | -0.37 | N/A | Sites in UTR |
| BMX       | NM_001721    | BMX non-receptor tyrosine kinase                                                            | 0 | 0 | 0 | 0 | 2 | 0 | 1 | 1 | hsa-miR-622 | -0.36 | N/A | Sites in UTR |
| ZNF518B   | NM_053042    | zinc finger protein 518B                                                                    | 0 | 0 | 0 | 0 | 2 | 0 | 1 | 1 | hsa-miR-622 | -0.36 | N/A | Sites in UTR |
| C1orf150  | NM_145278    | chromosome 1 open reading frame 150                                                         | 0 | 0 | 0 | 0 | 4 | 0 | 1 | 3 | hsa-miR-622 | -0.36 | N/A | Sites in UTR |
| RRN3      | NM_018427    | RRN3 RNA polymerase I transcription factor homolog (S. cerevisiae)                          | 0 | 0 | 0 | 0 | 2 | 1 | 1 | 0 | hsa-miR-622 | -0.36 | N/A | Sites in UTR |
| SLC25A4   | NM_001151    | solute carrier family 25 (mitochondrial carrier; adenine nucleotide translocator), member 4 | 1 | 1 | 0 | 0 | 1 | 0 | 0 | 1 | hsa-miR-622 | -0.36 | N/A | Sites in UTR |
| ANKRD13B  | NM_152345    | ankyrin repeat domain 13B                                                                   | 1 | 1 | 0 | 0 | 1 | 0 | 0 | 1 | hsa-miR-622 | -0.36 | N/A | Sites in UTR |

|         |              |                                                                               |   |   |   |   |   |   |   |   |             |       |     |              |
|---------|--------------|-------------------------------------------------------------------------------|---|---|---|---|---|---|---|---|-------------|-------|-----|--------------|
| TRAF6   | NM_004620    | TNF receptor-associated factor 6                                              | 1 | 1 | 0 | 0 | 1 | 0 | 1 | 0 | hsa-miR-622 | -0.36 | N/A | Sites in UTR |
| SRSF1   | NM_001078166 | serine/arginine-rich splicing factor 1                                        | 1 | 0 | 1 | 0 | 2 | 0 | 1 | 1 | hsa-miR-622 | -0.36 | N/A | Sites in UTR |
| FLOT1   | NM_005803    | flotillin 1                                                                   | 0 | 0 | 0 | 0 | 2 | 0 | 1 | 1 | hsa-miR-622 | -0.36 | N/A | Sites in UTR |
| SLAMF1  | NM_003037    | signaling lymphocytic activation molecule family member 1                     | 0 | 0 | 0 | 0 | 1 | 1 | 0 | 0 | hsa-miR-622 | -0.36 | N/A | Sites in UTR |
| FAM113B | NM_138371    | family with sequence similarity 113, member B                                 | 0 | 0 | 0 | 0 | 1 | 1 | 0 | 0 | hsa-miR-622 | -0.36 | N/A | Sites in UTR |
| PLEKHG7 | NM_001004330 | pleckstrin homology domain containing, family G (with RhoGef domain) member 7 | 0 | 0 | 0 | 0 | 1 | 1 | 0 | 0 | hsa-miR-622 | -0.36 | N/A | Sites in UTR |
| LRCH2   | NM_020871    | leucine-rich repeats and calponin homology (CH) domain containing 2           | 0 | 0 | 0 | 0 | 1 | 1 | 0 | 0 | hsa-miR-622 | -0.36 | N/A | Sites in UTR |
| PTEN    | NM_000314    | phosphatase and tensin homolog                                                | 0 | 0 | 0 | 0 | 2 | 1 | 1 | 0 | hsa-miR-622 | -0.36 | N/A | Sites in UTR |
| DIO3    | NM_001362    | deiodinase, iodothyronine, type III                                           | 0 | 0 | 0 | 0 | 1 | 1 | 0 | 0 | hsa-miR-622 | -0.35 | N/A | Sites in UTR |
| WHSC1   | NM_133334    | Wolf-Hirschhorn syndrome candidate 1                                          | 1 | 0 | 0 | 1 | 2 | 1 | 0 | 1 | hsa-miR-622 | -0.35 | N/A | Sites in UTR |
| SS18    | NM_001007559 | synovial sarcoma translocation, chromosome 18                                 | 1 | 1 | 0 | 0 | 0 | 0 | 0 | 0 | hsa-miR-622 | -0.35 | N/A | Sites in UTR |
| MTRF1   | NM_004294    | mitochondrial translational release factor 1                                  | 0 | 0 | 0 | 0 | 1 | 1 | 0 | 0 | hsa-miR-622 | -0.35 | N/A | Sites in UTR |
| PAN2    | NM_001127460 | PAN2 poly(A) specific ribonuclease subunit homolog (S. cerevisiae)            | 0 | 0 | 0 | 0 | 1 | 1 | 0 | 0 | hsa-miR-622 | -0.35 | N/A | Sites in UTR |
| DYRK2   | NM_003583    | dual-specificity tyrosine-(Y)-phosphorylation regulated kinase 2              | 1 | 1 | 0 | 0 | 1 | 0 | 1 | 0 | hsa-miR-622 | -0.35 | N/A | Sites in UTR |
| PHF17   | NM_024900    | PHD finger protein 17                                                         | 0 | 0 | 0 | 0 | 1 | 1 | 0 | 0 | hsa-miR-622 | -0.35 | N/A | Sites in UTR |
| PPP3R1  | NM_000945    | protein phosphatase 3, regulatory subunit B, alpha                            | 0 | 0 | 0 | 0 | 1 | 1 | 0 | 0 | hsa-miR-622 | -0.34 | N/A | Sites in UTR |
| NFAT5   | NM_001113178 | nuclear factor of activated T-cells 5, tonicity-responsive                    | 1 | 1 | 0 | 0 | 1 | 1 | 0 | 0 | hsa-miR-622 | -0.34 | N/A | Sites in UTR |
| ING1    | NM_005537    | inhibitor of growth family, member 1                                          | 1 | 1 | 0 | 0 | 0 | 0 | 0 | 0 | hsa-miR-622 | -0.34 | N/A | Sites in UTR |



|          |              |                                                                                   |   |   |   |   |   |   |   |   |             |       |     |              |
|----------|--------------|-----------------------------------------------------------------------------------|---|---|---|---|---|---|---|---|-------------|-------|-----|--------------|
| ITGB5    | NM_002213    | integrin, beta 5                                                                  | 0 | 0 | 0 | 0 | 1 | 1 | 0 | 0 | hsa-miR-622 | -0.34 | N/A | Sites in UTR |
| TM4SF1   | NM_014220    | transmembrane 4 L six family member 1                                             | 1 | 1 | 0 | 0 | 0 | 0 | 0 | 0 | hsa-miR-622 | -0.34 | N/A | Sites in UTR |
| SPIRE1   | NM_001128626 | spire homolog 1 (Drosophila)                                                      | 1 | 1 | 0 | 0 | 0 | 0 | 0 | 0 | hsa-miR-622 | -0.34 | N/A | Sites in UTR |
| ADNP2    | NM_014913    | ADNP homeobox 2                                                                   | 0 | 0 | 0 | 0 | 2 | 1 | 0 | 1 | hsa-miR-622 | -0.34 | N/A | Sites in UTR |
| TRPM6    | NM_001177310 | transient receptor potential cation channel, subfamily M, member 6                | 0 | 0 | 0 | 0 | 2 | 1 | 1 | 0 | hsa-miR-622 | -0.34 | N/A | Sites in UTR |
| EFHC1    | NM_001172420 | EF-hand domain (C-terminal) containing 1                                          | 0 | 0 | 0 | 0 | 4 | 0 | 4 | 0 | hsa-miR-622 | -0.34 | N/A | Sites in UTR |
| SRSF3    | NM_003017    | serine/arginine-rich splicing factor 3                                            | 0 | 0 | 0 | 0 | 1 | 1 | 0 | 0 | hsa-miR-622 | -0.34 | N/A | Sites in UTR |
| CMTM3    | NM_144601    | CKLF-like MARVEL transmembrane domain containing 3                                | 1 | 1 | 0 | 0 | 1 | 0 | 0 | 1 | hsa-miR-622 | -0.34 | N/A | Sites in UTR |
| CSF2RB   | NM_000395    | colony stimulating factor 2 receptor, beta, low-affinity (granulocyte-macrophage) | 0 | 0 | 0 | 0 | 2 | 1 | 0 | 1 | hsa-miR-622 | -0.34 | N/A | Sites in UTR |
| GPC6     | NM_005708    | glypican 6                                                                        | 1 | 1 | 0 | 0 | 1 | 1 | 0 | 0 | hsa-miR-622 | -0.34 | N/A | Sites in UTR |
| MBD2     | NM_003927    | methyl-CpG binding domain protein 2                                               | 1 | 1 | 0 | 0 | 1 | 0 | 1 | 0 | hsa-miR-622 | -0.34 | N/A | Sites in UTR |
| ALS2CL   | NM_001190707 | ALS2 C-terminal like                                                              | 0 | 0 | 0 | 0 | 1 | 1 | 0 | 0 | hsa-miR-622 | -0.34 | N/A | Sites in UTR |
| SCN2B    | NM_004588    | sodium channel, voltage-gated, type II, beta                                      | 1 | 1 | 0 | 0 | 1 | 0 | 1 | 0 | hsa-miR-622 | -0.33 | N/A | Sites in UTR |
| NR1H3    | NM_001130101 | nuclear receptor subfamily 1, group H, member 3                                   | 1 | 1 | 0 | 0 | 0 | 0 | 0 | 0 | hsa-miR-622 | -0.33 | N/A | Sites in UTR |
| RTN4     | NM_007008    | reticulon 4                                                                       | 0 | 0 | 0 | 0 | 1 | 1 | 0 | 0 | hsa-miR-622 | -0.33 | N/A | Sites in UTR |
| FLJ25363 | NM_001145553 | hypothetical LOC401082                                                            | 0 | 0 | 0 | 0 | 1 | 1 | 0 | 0 | hsa-miR-622 | -0.33 | N/A | Sites in UTR |
| CHTF18   | NM_022092    | CTF18, chromosome transmission fidelity factor 18 homolog (S. cerevisiae)         | 0 | 0 | 0 | 0 | 1 | 0 | 1 | 0 | hsa-miR-622 | -0.33 | N/A | Sites in UTR |
| ZFP161   | NM_001143823 | zinc finger protein 161 homolog (mouse)                                           | 0 | 0 | 0 | 0 | 2 | 0 | 1 | 1 | hsa-miR-622 | -0.33 | N/A | Sites in UTR |

|          |              |                                                                          |   |   |   |   |   |   |   |   |             |       |     |              |
|----------|--------------|--------------------------------------------------------------------------|---|---|---|---|---|---|---|---|-------------|-------|-----|--------------|
| ATP8B4   | NM_024837    | ATPase, class I, type 8B, member 4                                       | 0 | 0 | 0 | 0 | 2 | 1 | 0 | 1 | hsa-miR-622 | -0.33 | N/A | Sites in UTR |
| LRIT3    | NM_198506    | leucine-rich repeat, immunoglobulin-like and transmembrane domains 3     | 0 | 0 | 0 | 0 | 1 | 1 | 0 | 0 | hsa-miR-622 | -0.33 | N/A | Sites in UTR |
| GPR137B  | NM_003272    | G protein-coupled receptor 137B                                          | 0 | 0 | 0 | 0 | 2 | 0 | 1 | 1 | hsa-miR-622 | -0.33 | N/A | Sites in UTR |
| KIAA0240 | NM_015349    | KIAA0240                                                                 | 1 | 1 | 0 | 0 | 0 | 0 | 0 | 0 | hsa-miR-622 | -0.33 | N/A | Sites in UTR |
| ARID4B   | NM_001206794 | AT rich interactive domain 4B (RBP1-like)                                | 0 | 0 | 0 | 0 | 2 | 0 | 1 | 1 | hsa-miR-622 | -0.33 | N/A | Sites in UTR |
| CUBN     | NM_001081    | cubilin (intrinsic factor-cobalamin receptor)                            | 0 | 0 | 0 | 0 | 1 | 1 | 0 | 0 | hsa-miR-622 | -0.33 | N/A | Sites in UTR |
| FHOD3    | NM_025135    | formin homology 2 domain containing 3                                    | 0 | 0 | 0 | 0 | 1 | 1 | 0 | 0 | hsa-miR-622 | -0.33 | N/A | Sites in UTR |
| S1PR3    | NM_005226    | sphingosine-1-phosphate receptor 3                                       | 0 | 0 | 0 | 0 | 2 | 1 | 0 | 1 | hsa-miR-622 | -0.33 | N/A | Sites in UTR |
| SMCHD1   | NM_015295    | structural maintenance of chromosomes flexible hinge domain containing 1 | 1 | 1 | 0 | 0 | 0 | 0 | 0 | 0 | hsa-miR-622 | -0.33 | N/A | Sites in UTR |
| DYRK4    | NM_003845    | dual-specificity tyrosine-(Y)-phosphorylation regulated kinase 4         | 0 | 0 | 0 | 0 | 1 | 0 | 1 | 0 | hsa-miR-622 | -0.33 | N/A | Sites in UTR |
| CCL3L1   | NM_021006    | chemokine (C-C motif) ligand 3-like 1                                    | 0 | 0 | 0 | 0 | 1 | 1 | 0 | 0 | hsa-miR-622 | -0.33 | N/A | Sites in UTR |
| CCL3L3   | NM_001001437 | chemokine (C-C motif) ligand 3-like 3                                    | 0 | 0 | 0 | 0 | 1 | 1 | 0 | 0 | hsa-miR-622 | -0.33 | N/A | Sites in UTR |
| FAM53C   | NM_001135647 | family with sequence similarity 53, member C                             | 1 | 1 | 0 | 0 | 0 | 0 | 0 | 0 | hsa-miR-622 | -0.33 | N/A | Sites in UTR |
| PHACTR2  | NM_001100164 | phosphatase and actin regulator 2                                        | 1 | 1 | 0 | 0 | 1 | 0 | 0 | 1 | hsa-miR-622 | -0.32 | N/A | Sites in UTR |
| CCL3     | NM_002983    | chemokine (C-C motif) ligand 3                                           | 0 | 0 | 0 | 0 | 1 | 1 | 0 | 0 | hsa-miR-622 | -0.32 | N/A | Sites in UTR |
| TRIT1    | NM_017646    | tRNA isopentenyltransferase 1                                            | 0 | 0 | 0 | 0 | 1 | 1 | 0 | 0 | hsa-miR-622 | -0.32 | N/A | Sites in UTR |
| ZEB2     | NM_001171653 | zinc finger E-box binding homeobox 2                                     | 1 | 1 | 0 | 0 | 0 | 0 | 0 | 0 | hsa-miR-622 | -0.32 | N/A | Sites in UTR |
| ATG12    | NM_004707    | ATG12 autophagy related 12 homolog (S. cerevisiae)                       | 0 | 0 | 0 | 0 | 2 | 1 | 0 | 1 | hsa-miR-622 | -0.32 | N/A | Sites in UTR |

|          |              |                                                                |   |   |   |   |   |   |   |   |             |       |     |              |
|----------|--------------|----------------------------------------------------------------|---|---|---|---|---|---|---|---|-------------|-------|-----|--------------|
| SLC35B4  | NM_032826    | solute carrier family 35, member B4                            | 0 | 0 | 0 | 0 | 1 | 1 | 0 | 0 | hsa-miR-622 | -0.32 | N/A | Sites in UTR |
| UBE2Q2   | NM_001145335 | ubiquitin-conjugating enzyme E2Q family member 2               | 0 | 0 | 0 | 0 | 1 | 1 | 0 | 0 | hsa-miR-622 | -0.32 | N/A | Sites in UTR |
| GLTP     | NM_016433    | glycolipid transfer protein                                    | 1 | 1 | 0 | 0 | 0 | 0 | 0 | 0 | hsa-miR-622 | -0.32 | N/A | Sites in UTR |
| DBNDD2   | NM_001048221 | dysbindin (dystrobrevin binding protein 1) domain containing 2 | 1 | 1 | 0 | 0 | 0 | 0 | 0 | 0 | hsa-miR-622 | -0.32 | N/A | Sites in UTR |
| ARID4A   | NM_002892    | AT rich interactive domain 4A (RBP1-like)                      | 1 | 1 | 0 | 0 | 0 | 0 | 0 | 0 | hsa-miR-622 | -0.32 | N/A | Sites in UTR |
| KLHL4    | NM_019117    | kelch-like 4 (Drosophila)                                      | 0 | 0 | 0 | 0 | 2 | 0 | 2 | 0 | hsa-miR-622 | -0.32 | N/A | Sites in UTR |
| KRAS     | NM_004985    | v-Ki-ras2 Kirsten rat sarcoma viral oncogene homolog           | 0 | 0 | 0 | 0 | 2 | 0 | 2 | 0 | hsa-miR-622 | -0.32 | N/A | Sites in UTR |
| FPGS     | NM_001018078 | folylpolyglutamate synthase                                    | 0 | 0 | 0 | 0 | 1 | 1 | 0 | 0 | hsa-miR-622 | -0.32 | N/A | Sites in UTR |
| CD276    | NM_001024736 | CD276 molecule                                                 | 0 | 0 | 0 | 0 | 1 | 1 | 0 | 0 | hsa-miR-622 | -0.32 | N/A | Sites in UTR |
| KIAA1598 | NM_001127211 | KIAA1598                                                       | 0 | 0 | 0 | 0 | 2 | 0 | 1 | 1 | hsa-miR-622 | -0.31 | N/A | Sites in UTR |
| HDX      | NM_001177478 | highly divergent homeobox                                      | 1 | 0 | 1 | 0 | 0 | 0 | 0 | 0 | hsa-miR-622 | -0.31 | N/A | Sites in UTR |
| FKBP15   | NM_015258    | FK506 binding protein 15, 133kDa                               | 1 | 1 | 0 | 0 | 0 | 0 | 0 | 0 | hsa-miR-622 | -0.31 | N/A | Sites in UTR |
| GSTM5    | NM_000851    | glutathione S-transferase mu 5                                 | 0 | 0 | 0 | 0 | 2 | 1 | 1 | 0 | hsa-miR-622 | -0.31 | N/A | Sites in UTR |
| EPT1     | NM_033505    | ethanolaminephosphotransferase 1 (CDP-ethanolamine-specific)   | 0 | 0 | 0 | 0 | 3 | 0 | 2 | 1 | hsa-miR-622 | -0.31 | N/A | Sites in UTR |
| MTR      | NM_000254    | 5-methyltetrahydrofolate-homocysteine methyltransferase        | 0 | 0 | 0 | 0 | 4 | 1 | 1 | 2 | hsa-miR-622 | -0.31 | N/A | Sites in UTR |
| EML4     | NM_001145076 | echinoderm microtubule associated protein like 4               | 0 | 0 | 0 | 0 | 2 | 0 | 1 | 1 | hsa-miR-622 | -0.31 | N/A | Sites in UTR |
| ADAMTSL4 | NM_019032    | ADAMTS-like 4                                                  | 0 | 0 | 0 | 0 | 1 | 1 | 0 | 0 | hsa-miR-622 | -0.31 | N/A | Sites in UTR |
| PPM1E    | NM_014906    | protein phosphatase, Mg2+/Mn2+ dependent, 1E                   | 0 | 0 | 0 | 0 | 2 | 1 | 1 | 0 | hsa-miR-622 | -0.31 | N/A | Sites in UTR |

|          |              |                                                                                                      |   |   |   |   |   |   |   |   |             |       |     |              |
|----------|--------------|------------------------------------------------------------------------------------------------------|---|---|---|---|---|---|---|---|-------------|-------|-----|--------------|
| IFI44L   | NM_006820    | interferon-induced protein 44-like                                                                   | 0 | 0 | 0 | 0 | 4 | 1 | 1 | 2 | hsa-miR-622 | -0.31 | N/A | Sites in UTR |
| FOLR2    | NM_000803    | folate receptor 2 (fetal)                                                                            | 0 | 0 | 0 | 0 | 1 | 0 | 1 | 0 | hsa-miR-622 | -0.3  | N/A | Sites in UTR |
| THBD     | NM_000361    | thrombomodulin                                                                                       | 0 | 0 | 0 | 0 | 2 | 0 | 2 | 0 | hsa-miR-622 | -0.3  | N/A | Sites in UTR |
| SNED1    | NM_001080437 | sushi, nidogen and EGF-like domains 1                                                                | 0 | 0 | 0 | 0 | 1 | 1 | 0 | 0 | hsa-miR-622 | -0.3  | N/A | Sites in UTR |
| TMEM176A | NM_018487    | transmembrane protein 176A                                                                           | 0 | 0 | 0 | 0 | 1 | 1 | 0 | 0 | hsa-miR-622 | -0.3  | N/A | Sites in UTR |
| TBC1D14  | NM_001113361 | TBC1 domain family, member 14                                                                        | 1 | 1 | 0 | 0 | 0 | 0 | 0 | 0 | hsa-miR-622 | -0.3  | N/A | Sites in UTR |
| GLIS3    | NM_001042413 | GLIS family zinc finger 3                                                                            | 0 | 0 | 0 | 0 | 2 | 1 | 1 | 0 | hsa-miR-622 | -0.3  | N/A | Sites in UTR |
| CERS3    | NM_178842    | ceramide synthase 3                                                                                  | 0 | 0 | 0 | 0 | 2 | 0 | 2 | 0 | hsa-miR-622 | -0.3  | N/A | Sites in UTR |
| AIMP1    | NM_001142415 | aminoacyl tRNA synthetase complex-interacting multifunctional protein 1                              | 0 | 0 | 0 | 0 | 1 | 1 | 0 | 0 | hsa-miR-622 | -0.3  | N/A | Sites in UTR |
| FOXJ3    | NM_001198850 | forkhead box J3                                                                                      | 1 | 1 | 0 | 0 | 0 | 0 | 0 | 0 | hsa-miR-622 | -0.3  | N/A | Sites in UTR |
| SPRY3    | NM_005840    | sprouty homolog 3 (Drosophila)                                                                       | 0 | 0 | 0 | 0 | 2 | 1 | 1 | 0 | hsa-miR-622 | -0.3  | N/A | Sites in UTR |
| NFYA     | NM_002505    | nuclear transcription factor Y, alpha                                                                | 1 | 0 | 1 | 0 | 1 | 1 | 0 | 0 | hsa-miR-622 | -0.3  | N/A | Sites in UTR |
| GDPD5    | NM_030792    | glycerophosphodiester phosphodiesterase domain containing 5                                          | 1 | 1 | 0 | 0 | 0 | 0 | 0 | 0 | hsa-miR-622 | -0.3  | N/A | Sites in UTR |
| OSBPL1A  | NM_001242508 | oxysterol binding protein-like 1A                                                                    | 0 | 0 | 0 | 0 | 1 | 1 | 0 | 0 | hsa-miR-622 | -0.3  | N/A | Sites in UTR |
| CD84     | NM_001184879 | CD84 molecule                                                                                        | 0 | 0 | 0 | 0 | 2 | 1 | 0 | 1 | hsa-miR-622 | -0.3  | N/A | Sites in UTR |
| GTF3C1   | NM_001520    | general transcription factor IIIC, polypeptide 1, alpha 220kDa                                       | 0 | 0 | 0 | 0 | 1 | 1 | 0 | 0 | hsa-miR-622 | -0.3  | N/A | Sites in UTR |
| PEAR1    | NM_001080471 | platelet endothelial aggregation receptor 1                                                          | 0 | 0 | 0 | 0 | 1 | 1 | 0 | 0 | hsa-miR-622 | -0.3  | N/A | Sites in UTR |
| SLC35D1  | NM_015139    | solute carrier family 35 (UDP-glucuronic acid/UDP-N-acetylgalactosamine dual transporter), member D1 | 1 | 0 | 1 | 0 | 2 | 0 | 1 | 1 | hsa-miR-622 | -0.3  | N/A | Sites in UTR |

|         |              |                                                                                         |   |   |   |   |   |   |   |   |             |       |     |              |
|---------|--------------|-----------------------------------------------------------------------------------------|---|---|---|---|---|---|---|---|-------------|-------|-----|--------------|
| GALNTL2 | NM_054110    | UDP-N-acetyl-alpha-D-galactosamine:polypeptide N-acetylgalactosaminyltransferase-like 2 | 0 | 0 | 0 | 0 | 2 | 0 | 0 | 2 | hsa-miR-622 | -0.3  | N/A | Sites in UTR |
| FAM63A  | NM_001040217 | family with sequence similarity 63, member A                                            | 0 | 0 | 0 | 0 | 1 | 1 | 0 | 0 | hsa-miR-622 | -0.3  | N/A | Sites in UTR |
| SCN1A   | NM_001165963 | sodium channel, voltage-gated, type I, alpha subunit                                    | 1 | 0 | 1 | 0 | 2 | 0 | 1 | 1 | hsa-miR-622 | -0.3  | N/A | Sites in UTR |
| LRFN5   | NM_152447    | leucine rich repeat and fibronectin type III domain containing 5                        | 0 | 0 | 0 | 0 | 1 | 0 | 1 | 0 | hsa-miR-622 | -0.3  | N/A | Sites in UTR |
| PEX19   | NM_001193644 | peroxisomal biogenesis factor 19                                                        | 0 | 0 | 0 | 0 | 2 | 0 | 2 | 0 | hsa-miR-622 | -0.3  | N/A | Sites in UTR |
| RAB10   | NM_016131    | RAB10, member RAS oncogene family                                                       | 1 | 1 | 0 | 0 | 0 | 0 | 0 | 0 | hsa-miR-622 | -0.3  | N/A | Sites in UTR |
| ZCCHC11 | NM_001009881 | zinc finger, CCHC domain containing 11                                                  | 0 | 0 | 0 | 0 | 1 | 0 | 1 | 0 | hsa-miR-622 | -0.3  | N/A | Sites in UTR |
| PWWP2A  | NM_001130864 | PWWP domain containing 2A                                                               | 0 | 0 | 0 | 0 | 2 | 0 | 1 | 1 | hsa-miR-622 | -0.3  | N/A | Sites in UTR |
| ATF6    | NM_007348    | activating transcription factor 6                                                       | 0 | 0 | 0 | 0 | 1 | 1 | 0 | 0 | hsa-miR-622 | -0.3  | N/A | Sites in UTR |
| APOC2   | NM_000483    | apolipoprotein C-II                                                                     | 0 | 0 | 0 | 0 | 1 | 1 | 0 | 0 | hsa-miR-622 | -0.3  | N/A | Sites in UTR |
| JMJD6   | NM_001081461 | jumonji domain containing 6                                                             | 0 | 0 | 0 | 0 | 4 | 0 | 1 | 3 | hsa-miR-622 | -0.3  | N/A | Sites in UTR |
| ANGPT2  | NM_001118887 | angiotensinogen 2                                                                       | 0 | 0 | 0 | 0 | 1 | 1 | 0 | 0 | hsa-miR-622 | -0.29 | N/A | Sites in UTR |
| BCAS4   | NM_001010974 | breast carcinoma amplified sequence 4                                                   | 0 | 0 | 0 | 0 | 1 | 1 | 0 | 0 | hsa-miR-622 | -0.29 | N/A | Sites in UTR |
| OSBPL11 | NM_022776    | oxysterol binding protein-like 11                                                       | 0 | 0 | 0 | 0 | 1 | 1 | 0 | 0 | hsa-miR-622 | -0.29 | N/A | Sites in UTR |
| MALL    | NM_005434    | mal, T-cell differentiation protein-like                                                | 1 | 1 | 0 | 0 | 0 | 0 | 0 | 0 | hsa-miR-622 | -0.29 | N/A | Sites in UTR |
| ZNF706  | NM_001042510 | zinc finger protein 706                                                                 | 0 | 0 | 0 | 0 | 1 | 1 | 0 | 0 | hsa-miR-622 | -0.29 | N/A | Sites in UTR |
| PPARA   | NM_001001928 | peroxisome proliferator-activated receptor alpha                                        | 1 | 0 | 0 | 1 | 3 | 1 | 0 | 2 | hsa-miR-622 | -0.29 | N/A | Sites in UTR |
| AACS    | NM_023928    | acetoacetyl-CoA synthetase                                                              | 0 | 0 | 0 | 0 | 2 | 1 | 1 | 0 | hsa-miR-622 | -0.29 | N/A | Sites in UTR |

|            |              |                                                                                  |   |   |   |   |   |   |   |   |             |       |     |              |
|------------|--------------|----------------------------------------------------------------------------------|---|---|---|---|---|---|---|---|-------------|-------|-----|--------------|
| PVRL2      | NM_001042724 | poliovirus receptor-related 2 (herpesvirus entry mediator B)                     | 0 | 0 | 0 | 0 | 2 | 0 | 2 | 0 | hsa-miR-622 | -0.29 | N/A | Sites in UTR |
| C9orf66    | NM_152569    | chromosome 9 open reading frame 66                                               | 0 | 0 | 0 | 0 | 1 | 1 | 0 | 0 | hsa-miR-622 | -0.29 | N/A | Sites in UTR |
| FAM154B    | NM_001008226 | family with sequence similarity 154, member B                                    | 0 | 0 | 0 | 0 | 3 | 0 | 2 | 1 | hsa-miR-622 | -0.29 | N/A | Sites in UTR |
| SALL1      | NM_001127892 | sal-like 1 (Drosophila)                                                          | 1 | 1 | 0 | 0 | 0 | 0 | 0 | 0 | hsa-miR-622 | -0.29 | N/A | Sites in UTR |
| CAMTA1     | NM_015215    | calmodulin binding transcription activator 1                                     | 1 | 0 | 1 | 0 | 1 | 0 | 1 | 0 | hsa-miR-622 | -0.29 | N/A | Sites in UTR |
| MTHFS      | NM_001199758 | 5,10-methenyltetrahydrofolate synthetase (5-formyltetrahydrofolate cyclo-ligase) | 0 | 0 | 0 | 0 | 1 | 0 | 1 | 0 | hsa-miR-622 | -0.29 | N/A | Sites in UTR |
| ST20-MTHFS | NM_001199760 | ST20-MTHFS readthrough                                                           | 0 | 0 | 0 | 0 | 1 | 0 | 1 | 0 | hsa-miR-622 | -0.29 | N/A | Sites in UTR |
| SLAIN2     | NM_020846    | SLAIN motif family, member 2                                                     | 1 | 0 | 1 | 0 | 1 | 0 | 1 | 0 | hsa-miR-622 | -0.29 | N/A | Sites in UTR |
| ANKRD20A3  | NM_001012419 | ankyrin repeat domain 20 family, member A3                                       | 0 | 0 | 0 | 0 | 1 | 1 | 0 | 0 | hsa-miR-622 | -0.29 | N/A | Sites in UTR |
| SLC24A1    | NM_004727    | solute carrier family 24 (sodium/potassium/calcium exchanger), member 1          | 0 | 0 | 0 | 0 | 3 | 0 | 1 | 2 | hsa-miR-622 | -0.29 | N/A | Sites in UTR |
| LEF1       | NM_001130713 | lymphoid enhancer-binding factor 1                                               | 0 | 0 | 0 | 0 | 2 | 0 | 2 | 0 | hsa-miR-622 | -0.29 | N/A | Sites in UTR |
| ARL4D      | NM_001661    | ADP-ribosylation factor-like 4D                                                  | 1 | 0 | 0 | 1 | 1 | 0 | 1 | 0 | hsa-miR-622 | -0.29 | N/A | Sites in UTR |
| TRDN       | NM_006073    | triadin                                                                          | 0 | 0 | 0 | 0 | 2 | 0 | 2 | 0 | hsa-miR-622 | -0.29 | N/A | Sites in UTR |
| KCNJ8      | NM_004982    | potassium inwardly-rectifying channel, subfamily J, member 8                     | 0 | 0 | 0 | 0 | 1 | 1 | 0 | 0 | hsa-miR-622 | -0.29 | N/A | Sites in UTR |
| NUP50      | NM_007172    | nucleoporin 50kDa                                                                | 0 | 0 | 0 | 0 | 1 | 1 | 0 | 0 | hsa-miR-622 | -0.29 | N/A | Sites in UTR |
| PNN        | NM_002687    | pinin, desmosome associated protein                                              | 0 | 0 | 0 | 0 | 1 | 0 | 1 | 0 | hsa-miR-622 | -0.28 | N/A | Sites in UTR |
| TBL1XR1    | NM_024665    | transducin (beta)-like 1 X-linked receptor 1                                     | 0 | 0 | 0 | 0 | 2 | 0 | 1 | 1 | hsa-miR-622 | -0.28 | N/A | Sites in UTR |
| CCDC14     | NM_022757    | coiled-coil domain containing 14                                                 | 1 | 1 | 0 | 0 | 0 | 0 | 0 | 0 | hsa-miR-622 | -0.28 | N/A | Sites in UTR |

|         |              |                                                                    |   |   |   |   |   |   |   |   |             |       |     |              |
|---------|--------------|--------------------------------------------------------------------|---|---|---|---|---|---|---|---|-------------|-------|-----|--------------|
| DNAH5   | NM_001369    | dynein, axonemal, heavy chain 5                                    | 0 | 0 | 0 | 0 | 3 | 0 | 1 | 2 | hsa-miR-622 | -0.28 | N/A | Sites in UTR |
| PATZ1   | NM_014323    | POZ (BTB) and AT hook containing zinc finger 1                     | 0 | 0 | 0 | 0 | 1 | 0 | 1 | 0 | hsa-miR-622 | -0.28 | N/A | Sites in UTR |
| MAP6    | NM_207577    | microtubule-associated protein 6                                   | 0 | 0 | 0 | 0 | 1 | 1 | 0 | 0 | hsa-miR-622 | -0.28 | N/A | Sites in UTR |
| MRPS27  | NM_015084    | mitochondrial ribosomal protein S27                                | 0 | 0 | 0 | 0 | 1 | 1 | 0 | 0 | hsa-miR-622 | -0.28 | N/A | Sites in UTR |
| MECOM   | NM_001105077 | MDS1 and EVI1 complex locus                                        | 0 | 0 | 0 | 0 | 1 | 0 | 1 | 0 | hsa-miR-622 | -0.28 | N/A | Sites in UTR |
| METTL20 | NM_001135863 | methyltransferase like 20                                          | 0 | 0 | 0 | 0 | 1 | 0 | 1 | 0 | hsa-miR-622 | -0.28 | N/A | Sites in UTR |
| OR13A1  | NM_001004297 | olfactory receptor, family 13, subfamily A, member 1               | 0 | 0 | 0 | 0 | 1 | 1 | 0 | 0 | hsa-miR-622 | -0.28 | N/A | Sites in UTR |
| SORT1   | NM_001205228 | sortilin 1                                                         | 1 | 0 | 1 | 0 | 1 | 0 | 0 | 1 | hsa-miR-622 | -0.28 | N/A | Sites in UTR |
| UQCRCF1 | NM_006003    | ubiquinol-cytochrome c reductase, Rieske iron-sulfur polypeptide 1 | 0 | 0 | 0 | 0 | 1 | 0 | 1 | 0 | hsa-miR-622 | -0.28 | N/A | Sites in UTR |
| MCMBP   | NM_024834    | minichromosome maintenance complex binding protein                 | 0 | 0 | 0 | 0 | 2 | 0 | 2 | 0 | hsa-miR-622 | -0.28 | N/A | Sites in UTR |
| PAPLN   | NM_173462    | papilin, proteoglycan-like sulfated glycoprotein                   | 0 | 0 | 0 | 0 | 2 | 0 | 2 | 0 | hsa-miR-622 | -0.28 | N/A | Sites in UTR |
| TRIM25  | NM_005082    | tripartite motif containing 25                                     | 0 | 0 | 0 | 0 | 1 | 1 | 0 | 0 | hsa-miR-622 | -0.28 | N/A | Sites in UTR |
| CNNM2   | NM_199077    | cyclin M2                                                          | 0 | 0 | 0 | 0 | 1 | 1 | 0 | 0 | hsa-miR-622 | -0.28 | N/A | Sites in UTR |
| RNF215  | NM_001017981 | ring finger protein 215                                            | 0 | 0 | 0 | 0 | 1 | 1 | 0 | 0 | hsa-miR-622 | -0.28 | N/A | Sites in UTR |
| RXRB    | NM_021976    | retinoid X receptor, beta                                          | 1 | 1 | 0 | 0 | 0 | 0 | 0 | 0 | hsa-miR-622 | -0.28 | N/A | Sites in UTR |
| PKIG    | NM_007066    | protein kinase (cAMP-dependent, catalytic) inhibitor gamma         | 1 | 1 | 0 | 0 | 0 | 0 | 0 | 0 | hsa-miR-622 | -0.28 | N/A | Sites in UTR |
| DTX4    | NM_015177    | deltex homolog 4 (Drosophila)                                      | 0 | 0 | 0 | 0 | 1 | 1 | 0 | 0 | hsa-miR-622 | -0.28 | N/A | Sites in UTR |
| GAB4    | NM_001037814 | GRB2-associated binding protein family, member 4                   | 0 | 0 | 0 | 0 | 1 | 1 | 0 | 0 | hsa-miR-622 | -0.28 | N/A | Sites in UTR |

|          |              |                                                                        |   |   |   |   |   |   |   |   |   |             |       |     |              |
|----------|--------------|------------------------------------------------------------------------|---|---|---|---|---|---|---|---|---|-------------|-------|-----|--------------|
| LARGE    | NM_004737    | like-glycosyltransferase                                               | 1 | 0 | 1 | 0 | 0 | 0 | 0 | 0 | 0 | hsa-miR-622 | -0.28 | N/A | Sites in UTR |
| TNFRSF1B | NM_001066    | tumor necrosis factor receptor superfamily, member 1B                  | 0 | 0 | 0 | 0 | 2 | 0 | 2 | 0 | 0 | hsa-miR-622 | -0.28 | N/A | Sites in UTR |
| STX6     | NM_005819    | syntaxin 6                                                             | 1 | 1 | 0 | 0 | 0 | 0 | 0 | 0 | 0 | hsa-miR-622 | -0.28 | N/A | Sites in UTR |
| FGD2     | NM_173558    | FYVE, RhoGEF and PH domain containing 2                                | 0 | 0 | 0 | 0 | 1 | 1 | 0 | 0 | 0 | hsa-miR-622 | -0.28 | N/A | Sites in UTR |
| KCNJ14   | NM_013348    | potassium inwardly-rectifying channel, subfamily J, member 14          | 0 | 0 | 0 | 0 | 3 | 0 | 0 | 3 | 0 | hsa-miR-622 | -0.28 | N/A | Sites in UTR |
| CTNNA1   | NM_001903    | catenin (cadherin-associated protein), alpha 1, 102kDa                 | 0 | 0 | 0 | 0 | 1 | 1 | 0 | 0 | 0 | hsa-miR-622 | -0.28 | N/A | Sites in UTR |
| ITGA4    | NM_000885    | integrin, alpha 4 (antigen CD49D, alpha 4 subunit of VLA-4 receptor)   | 0 | 0 | 0 | 0 | 1 | 1 | 0 | 0 | 0 | hsa-miR-622 | -0.28 | N/A | Sites in UTR |
| MYH9     | NM_002473    | myosin, heavy chain 9, non-muscle                                      | 0 | 0 | 0 | 0 | 1 | 1 | 0 | 0 | 0 | hsa-miR-622 | -0.28 | N/A | Sites in UTR |
| TIAL1    | NM_001033925 | TIA1 cytotoxic granule-associated RNA binding protein-like 1           | 1 | 1 | 0 | 0 | 1 | 0 | 0 | 1 | 0 | hsa-miR-622 | -0.28 | N/A | Sites in UTR |
| TNFRSF19 | NM_001204458 | tumor necrosis factor receptor superfamily, member 19                  | 1 | 0 | 0 | 1 | 2 | 1 | 0 | 1 | 0 | hsa-miR-622 | -0.28 | N/A | Sites in UTR |
| KIF1B    | NM_015074    | kinesin family member 1B                                               | 0 | 0 | 0 | 0 | 1 | 0 | 1 | 0 | 0 | hsa-miR-622 | -0.28 | N/A | Sites in UTR |
| NFS1     | NM_001198989 | NFS1 nitrogen fixation 1 homolog ( <i>S. cerevisiae</i> )              | 0 | 0 | 0 | 0 | 1 | 1 | 0 | 0 | 0 | hsa-miR-622 | -0.28 | N/A | Sites in UTR |
| KIAA0748 | NM_001098815 | KIAA0748                                                               | 0 | 0 | 0 | 0 | 1 | 1 | 0 | 0 | 0 | hsa-miR-622 | -0.28 | N/A | Sites in UTR |
| RNF213   | NM_020914    | ring finger protein 213                                                | 0 | 0 | 0 | 0 | 3 | 0 | 3 | 0 | 0 | hsa-miR-622 | -0.27 | N/A | Sites in UTR |
| DGKB     | NM_145695    | diacylglycerol kinase, beta 90kDa                                      | 0 | 0 | 0 | 0 | 1 | 0 | 1 | 0 | 0 | hsa-miR-622 | -0.27 | N/A | Sites in UTR |
| SLC25A26 | NM_001164796 | solute carrier family 25, member 26                                    | 0 | 0 | 0 | 0 | 1 | 1 | 0 | 0 | 0 | hsa-miR-622 | -0.27 | N/A | Sites in UTR |
| TDRD9    | NM_153046    | tudor domain containing 9                                              | 0 | 0 | 0 | 0 | 1 | 1 | 0 | 0 | 0 | hsa-miR-622 | -0.27 | N/A | Sites in UTR |
| XRCC2    | NM_005431    | X-ray repair complementing defective repair in Chinese hamster cells 2 | 0 | 0 | 0 | 0 | 3 | 0 | 1 | 2 | 0 | hsa-miR-622 | -0.27 | N/A | Sites in UTR |



|          |              |                                                                                         |   |   |   |   |   |   |   |   |             |       |     |              |
|----------|--------------|-----------------------------------------------------------------------------------------|---|---|---|---|---|---|---|---|-------------|-------|-----|--------------|
| RFWD3    | NM_018124    | ring finger and WD repeat domain 3                                                      | 0 | 0 | 0 | 0 | 2 | 1 | 1 | 0 | hsa-miR-622 | -0.27 | N/A | Sites in UTR |
| KIAA0586 | NM_014749    | KIAA0586                                                                                | 0 | 0 | 0 | 0 | 1 | 0 | 1 | 0 | hsa-miR-622 | -0.27 | N/A | Sites in UTR |
| NRSN1    | NM_080723    | neurensin 1                                                                             | 0 | 0 | 0 | 0 | 2 | 0 | 0 | 2 | hsa-miR-622 | -0.27 | N/A | Sites in UTR |
| CD200    | NM_001004196 | CD200 molecule                                                                          | 0 | 0 | 0 | 0 | 1 | 1 | 0 | 0 | hsa-miR-622 | -0.27 | N/A | Sites in UTR |
| GUF1     | NM_021927    | GUF1 GTPase homolog (S. cerevisiae)                                                     | 0 | 0 | 0 | 0 | 2 | 0 | 2 | 0 | hsa-miR-622 | -0.27 | N/A | Sites in UTR |
| ZNF12    | NM_006956    | zinc finger protein 12                                                                  | 0 | 0 | 0 | 0 | 1 | 1 | 0 | 0 | hsa-miR-622 | -0.27 | N/A | Sites in UTR |
| RNF220   | NM_018150    | ring finger protein 220                                                                 | 1 | 1 | 0 | 0 | 0 | 0 | 0 | 0 | hsa-miR-622 | -0.27 | N/A | Sites in UTR |
| SLC17A7  | NM_020309    | solute carrier family 17 (sodium-dependent inorganic phosphate cotransporter), member 7 | 0 | 0 | 0 | 0 | 1 | 1 | 0 | 0 | hsa-miR-622 | -0.27 | N/A | Sites in UTR |
| NCS1     | NM_001128826 | neuronal calcium sensor 1                                                               | 1 | 1 | 0 | 0 | 1 | 0 | 1 | 0 | hsa-miR-622 | -0.27 | N/A | Sites in UTR |
| CLK1     | NM_001162407 | CDC-like kinase 1                                                                       | 0 | 0 | 0 | 0 | 1 | 0 | 1 | 0 | hsa-miR-622 | -0.27 | N/A | Sites in UTR |
| SMOC2    | NM_001166412 | SPARC related modular calcium binding 2                                                 | 0 | 0 | 0 | 0 | 1 | 0 | 1 | 0 | hsa-miR-622 | -0.27 | N/A | Sites in UTR |
| CBLN2    | NM_182511    | cerebellin 2 precursor                                                                  | 0 | 0 | 0 | 0 | 1 | 0 | 1 | 0 | hsa-miR-622 | -0.27 | N/A | Sites in UTR |
| ANKRD29  | NM_173505    | ankyrin repeat domain 29                                                                | 0 | 0 | 0 | 0 | 2 | 0 | 1 | 1 | hsa-miR-622 | -0.27 | N/A | Sites in UTR |
| TPRG1    | NM_198485    | tumor protein p63 regulated 1                                                           | 1 | 0 | 1 | 0 | 1 | 0 | 1 | 0 | hsa-miR-622 | -0.27 | N/A | Sites in UTR |
| ATP2A3   | NM_005173    | ATPase, Ca++ transporting, ubiquitous                                                   | 0 | 0 | 0 | 0 | 1 | 1 | 0 | 0 | hsa-miR-622 | -0.27 | N/A | Sites in UTR |
| ZNF248   | NM_021045    | zinc finger protein 248                                                                 | 0 | 0 | 0 | 0 | 1 | 1 | 0 | 0 | hsa-miR-622 | -0.27 | N/A | Sites in UTR |
| ESRRG    | NM_001134285 | estrogen-related receptor gamma                                                         | 0 | 0 | 0 | 0 | 2 | 0 | 2 | 0 | hsa-miR-622 | -0.27 | N/A | Sites in UTR |
| C12orf69 | NM_001013698 | chromosome 12 open reading frame 69                                                     | 0 | 0 | 0 | 0 | 2 | 0 | 1 | 1 | hsa-miR-622 | -0.27 | N/A | Sites in UTR |

|              |              |                                                                                                               |   |   |   |   |   |   |   |   |             |       |     |              |
|--------------|--------------|---------------------------------------------------------------------------------------------------------------|---|---|---|---|---|---|---|---|-------------|-------|-----|--------------|
| PDF          | NM_022341    | peptide deformylase (mitochondrial)                                                                           | 0 | 0 | 0 | 0 | 1 | 1 | 0 | 0 | hsa-miR-622 | -0.27 | N/A | Sites in UTR |
| SLC25A38     | NM_017875    | solute carrier family 25, member 38                                                                           | 0 | 0 | 0 | 0 | 1 | 1 | 0 | 0 | hsa-miR-622 | -0.27 | N/A | Sites in UTR |
| UBL4B        | NM_203412    | ubiquitin-like 4B                                                                                             | 0 | 0 | 0 | 0 | 1 | 1 | 0 | 0 | hsa-miR-622 | -0.27 | N/A | Sites in UTR |
| LOC100287036 | NM_001242885 | hypothetical LOC100287036                                                                                     | 0 | 0 | 0 | 0 | 1 | 1 | 0 | 0 | hsa-miR-622 | -0.27 | N/A | Sites in UTR |
| CDC42EP3     | NM_006449    | CDC42 effector protein (Rho GTPase binding) 3                                                                 | 0 | 0 | 0 | 0 | 1 | 0 | 1 | 0 | hsa-miR-622 | -0.27 | N/A | Sites in UTR |
| PABPC1L2A    | NM_001012977 | poly(A) binding protein, cytoplasmic 1-like 2A                                                                | 0 | 0 | 0 | 0 | 1 | 0 | 1 | 0 | hsa-miR-622 | -0.27 | N/A | Sites in UTR |
| PDE4DIP      | NM_001198832 | phosphodiesterase 4D interacting protein                                                                      | 0 | 0 | 0 | 0 | 1 | 1 | 0 | 0 | hsa-miR-622 | -0.27 | N/A | Sites in UTR |
| TRDMT1       | NM_004412    | tRNA aspartic acid methyltransferase 1                                                                        | 0 | 0 | 0 | 0 | 2 | 1 | 0 | 1 | hsa-miR-622 | -0.27 | N/A | Sites in UTR |
| C9orf72      | NM_145005    | chromosome 9 open reading frame 72                                                                            | 0 | 0 | 0 | 0 | 1 | 0 | 1 | 0 | hsa-miR-622 | -0.27 | N/A | Sites in UTR |
| ARIH1        | NM_005744    | ariadne homolog, ubiquitin-conjugating enzyme E2 binding protein, 1 (Drosophila)                              | 0 | 0 | 0 | 0 | 1 | 1 | 0 | 0 | hsa-miR-622 | -0.27 | N/A | Sites in UTR |
| FCGR2B       | NM_001002273 | Fc fragment of IgG, low affinity IIb, receptor (CD32)                                                         | 0 | 0 | 0 | 0 | 2 | 0 | 1 | 1 | hsa-miR-622 | -0.27 | N/A | Sites in UTR |
| LOC388564    | NM_001190764 | hypothetical protein LOC388564                                                                                | 0 | 0 | 0 | 0 | 1 | 1 | 0 | 0 | hsa-miR-622 | -0.27 | N/A | Sites in UTR |
| RBM3         | NM_006743    | RNA binding motif (RNP1, RRM) protein 3                                                                       | 0 | 0 | 0 | 0 | 1 | 1 | 0 | 0 | hsa-miR-622 | -0.27 | N/A | Sites in UTR |
| PTGES        | NM_004878    | prostaglandin E synthase                                                                                      | 0 | 0 | 0 | 0 | 1 | 1 | 0 | 0 | hsa-miR-622 | -0.27 | N/A | Sites in UTR |
| RHBDL3       | NM_138328    | rhomoid, veinlet-like 3 (Drosophila)                                                                          | 0 | 0 | 0 | 0 | 1 | 0 | 1 | 0 | hsa-miR-622 | -0.26 | N/A | Sites in UTR |
| SLC39A12     | NM_001145195 | solute carrier family 39 (zinc transporter), member 12                                                        | 0 | 0 | 0 | 0 | 1 | 0 | 1 | 0 | hsa-miR-622 | -0.26 | N/A | Sites in UTR |
| ST6GALNAC3   | NM_152996    | ST6 (alpha-N-acetyl-neuraminyl-2,3-beta-galactosyl-1,3)-N-acetylgalactosaminide alpha-2,6-sialyltransferase 3 | 0 | 0 | 0 | 0 | 1 | 0 | 1 | 0 | hsa-miR-622 | -0.26 | N/A | Sites in UTR |
| PAPOLA       | NM_032632    | poly(A) polymerase alpha                                                                                      | 1 | 0 | 1 | 0 | 0 | 0 | 0 | 0 | hsa-miR-622 | -0.26 | N/A | Sites in UTR |

|          |              |                                                                  |   |   |   |   |   |   |   |   |             |       |     |              |
|----------|--------------|------------------------------------------------------------------|---|---|---|---|---|---|---|---|-------------|-------|-----|--------------|
| MMP16    | NM_005941    | matrix metalloproteinase 16 (membrane-inserted)                  | 0 | 0 | 0 | 0 | 1 | 0 | 1 | 0 | hsa-miR-622 | -0.26 | N/A | Sites in UTR |
| KDM6A    | NM_021140    | lysine (K)-specific demethylase 6A                               | 1 | 0 | 1 | 0 | 0 | 0 | 0 | 0 | hsa-miR-622 | -0.26 | N/A | Sites in UTR |
| GPR89B   | NM_016334    | G protein-coupled receptor 89B                                   | 1 | 0 | 1 | 0 | 0 | 0 | 0 | 0 | hsa-miR-622 | -0.26 | N/A | Sites in UTR |
| GPR89A   | NM_001097612 | G protein-coupled receptor 89A                                   | 1 | 0 | 1 | 0 | 0 | 0 | 0 | 0 | hsa-miR-622 | -0.26 | N/A | Sites in UTR |
| GPR89C   | NM_001097616 | G protein-coupled receptor 89C                                   | 1 | 0 | 1 | 0 | 0 | 0 | 0 | 0 | hsa-miR-622 | -0.26 | N/A | Sites in UTR |
| CLEC4F   | NM_173535    | C-type lectin domain family 4, member F                          | 0 | 0 | 0 | 0 | 1 | 1 | 0 | 0 | hsa-miR-622 | -0.26 | N/A | Sites in UTR |
| IRX1     | NM_024337    | iroquois homeobox 1                                              | 0 | 0 | 0 | 0 | 1 | 0 | 1 | 0 | hsa-miR-622 | -0.26 | N/A | Sites in UTR |
| TLE4     | NM_007005    | transducin-like enhancer of split 4 (E(sp1) homolog, Drosophila) | 0 | 0 | 0 | 0 | 2 | 0 | 1 | 1 | hsa-miR-622 | -0.26 | N/A | Sites in UTR |
| PAX3     | NM_001127366 | paired box 3                                                     | 0 | 0 | 0 | 0 | 2 | 0 | 2 | 0 | hsa-miR-622 | -0.26 | N/A | Sites in UTR |
| GRIN2D   | NM_000836    | glutamate receptor, ionotropic, N-methyl D-aspartate 2D          | 3 | 0 | 3 | 0 | 1 | 0 | 1 | 0 | hsa-miR-622 | -0.26 | N/A | Sites in UTR |
| DLX6     | NM_005222    | distal-less homeobox 6                                           | 1 | 1 | 0 | 0 | 0 | 0 | 0 | 0 | hsa-miR-622 | -0.26 | N/A | Sites in UTR |
| STX7     | NM_003569    | syntaxin 7                                                       | 0 | 0 | 0 | 0 | 3 | 1 | 2 | 0 | hsa-miR-622 | -0.26 | N/A | Sites in UTR |
| ATE1     | NM_001001976 | arginyltransferase 1                                             | 0 | 0 | 0 | 0 | 1 | 0 | 1 | 0 | hsa-miR-622 | -0.26 | N/A | Sites in UTR |
| TTC19    | NM_017775    | tetratricopeptide repeat domain 19                               | 0 | 0 | 0 | 0 | 1 | 0 | 1 | 0 | hsa-miR-622 | -0.26 | N/A | Sites in UTR |
| PI4KB    | NM_001198773 | phosphatidylinositol 4-kinase, catalytic, beta                   | 0 | 0 | 0 | 0 | 1 | 1 | 0 | 0 | hsa-miR-622 | -0.26 | N/A | Sites in UTR |
| C14orf43 | NM_001043318 | chromosome 14 open reading frame 43                              | 2 | 0 | 1 | 1 | 0 | 0 | 0 | 0 | hsa-miR-622 | -0.26 | N/A | Sites in UTR |
| SLC35E1  | NM_024881    | solute carrier family 35, member E1                              | 0 | 0 | 0 | 0 | 2 | 0 | 2 | 0 | hsa-miR-622 | -0.26 | N/A | Sites in UTR |
| TMOD1    | NM_001166116 | tropomodulin 1                                                   | 0 | 0 | 0 | 0 | 1 | 1 | 0 | 0 | hsa-miR-622 | -0.26 | N/A | Sites in UTR |

|          |              |                                                            |   |   |   |   |   |   |   |   |             |       |     |              |
|----------|--------------|------------------------------------------------------------|---|---|---|---|---|---|---|---|-------------|-------|-----|--------------|
| PRR5L    | NM_001160167 | proline rich 5 like                                        | 0 | 0 | 0 | 0 | 1 | 1 | 0 | 0 | hsa-miR-622 | -0.26 | N/A | Sites in UTR |
| WWC3     | NM_015691    | WWC family member 3                                        | 1 | 0 | 0 | 1 | 2 | 0 | 1 | 1 | hsa-miR-622 | -0.26 | N/A | Sites in UTR |
| PCTP     | NM_001102402 | phosphatidylcholine transfer protein                       | 0 | 0 | 0 | 0 | 1 | 0 | 1 | 0 | hsa-miR-622 | -0.26 | N/A | Sites in UTR |
| TMEM47   | NM_031442    | transmembrane protein 47                                   | 1 | 0 | 1 | 0 | 0 | 0 | 0 | 0 | hsa-miR-622 | -0.26 | N/A | Sites in UTR |
| PGRMC2   | NM_006320    | progesterone receptor membrane component 2                 | 1 | 0 | 0 | 1 | 1 | 0 | 1 | 0 | hsa-miR-622 | -0.26 | N/A | Sites in UTR |
| C15orf29 | NM_024713    | chromosome 15 open reading frame 29                        | 0 | 0 | 0 | 0 | 2 | 0 | 1 | 1 | hsa-miR-622 | -0.26 | N/A | Sites in UTR |
| 11-Sep   | NM_018243    | septin 11                                                  | 0 | 0 | 0 | 0 | 2 | 0 | 2 | 0 | hsa-miR-622 | -0.26 | N/A | Sites in UTR |
| PDCD1LG2 | NM_025239    | programmed cell death 1 ligand 2                           | 0 | 0 | 0 | 0 | 1 | 1 | 0 | 0 | hsa-miR-622 | -0.26 | N/A | Sites in UTR |
| WDR65    | NM_001167965 | WD repeat domain 65                                        | 0 | 0 | 0 | 0 | 1 | 1 | 0 | 0 | hsa-miR-622 | -0.26 | N/A | Sites in UTR |
| PRKAR2A  | NM_004157    | protein kinase, cAMP-dependent, regulatory, type II, alpha | 0 | 0 | 0 | 0 | 1 | 1 | 0 | 0 | hsa-miR-622 | -0.25 | N/A | Sites in UTR |
| RAB31    | NM_006868    | RAB31, member RAS oncogene family                          | 0 | 0 | 0 | 0 | 1 | 1 | 0 | 0 | hsa-miR-622 | -0.25 | N/A | Sites in UTR |
| PCGF5    | NM_032373    | polycomb group ring finger 5                               | 0 | 0 | 0 | 0 | 2 | 1 | 0 | 1 | hsa-miR-622 | -0.25 | N/A | Sites in UTR |
| EBF3     | NM_001005463 | early B-cell factor 3                                      | 0 | 0 | 0 | 0 | 2 | 0 | 1 | 1 | hsa-miR-622 | -0.25 | N/A | Sites in UTR |
| MAP3K2   | NM_006609    | mitogen-activated protein kinase kinase kinase 2           | 1 | 0 | 1 | 0 | 2 | 1 | 1 | 0 | hsa-miR-622 | -0.25 | N/A | Sites in UTR |
| GNL3     | NM_014366    | guanine nucleotide binding protein-like 3 (nucleolar)      | 0 | 0 | 0 | 0 | 1 | 0 | 1 | 0 | hsa-miR-622 | -0.25 | N/A | Sites in UTR |
| SMC2     | NM_001042550 | structural maintenance of chromosomes 2                    | 0 | 0 | 0 | 0 | 2 | 0 | 1 | 1 | hsa-miR-622 | -0.25 | N/A | Sites in UTR |
| FRS2     | NM_001042555 | fibroblast growth factor receptor substrate 2              | 1 | 0 | 0 | 1 | 1 | 0 | 1 | 0 | hsa-miR-622 | -0.25 | N/A | Sites in UTR |
| MAPK1    | NM_002745    | mitogen-activated protein kinase 1                         | 0 | 0 | 0 | 0 | 2 | 0 | 2 | 0 | hsa-miR-622 | -0.25 | N/A | Sites in UTR |

|         |              |                                                                            |   |   |   |   |   |   |   |   |             |       |     |              |
|---------|--------------|----------------------------------------------------------------------------|---|---|---|---|---|---|---|---|-------------|-------|-----|--------------|
| RTF1    | NM_015138    | Rtf1, Paf1/RNA polymerase II complex component, homolog (S. cerevisiae)    | 1 | 0 | 1 | 0 | 1 | 0 | 1 | 0 | hsa-miR-622 | -0.25 | N/A | Sites in UTR |
| EIF4E1B | NM_001099408 | eukaryotic translation initiation factor 4E family member 1B               | 0 | 0 | 0 | 0 | 1 | 1 | 0 | 0 | hsa-miR-622 | -0.25 | N/A | Sites in UTR |
| ADIPOQ  | NM_001177800 | adiponectin, C1Q and collagen domain containing                            | 0 | 0 | 0 | 0 | 1 | 0 | 1 | 0 | hsa-miR-622 | -0.25 | N/A | Sites in UTR |
| WIPF1   | NM_001077269 | WAS/WASL interacting protein family, member 1                              | 0 | 0 | 0 | 0 | 1 | 0 | 1 | 0 | hsa-miR-622 | -0.25 | N/A | Sites in UTR |
| DLG5    | NM_004747    | discs, large homolog 5 (Drosophila)                                        | 0 | 0 | 0 | 0 | 2 | 0 | 2 | 0 | hsa-miR-622 | -0.25 | N/A | Sites in UTR |
| CNP     | NM_033133    | 2',3'-cyclic nucleotide 3' phosphodiesterase                               | 0 | 0 | 0 | 0 | 3 | 0 | 2 | 1 | hsa-miR-622 | -0.25 | N/A | Sites in UTR |
| RGS20   | NM_003702    | regulator of G-protein signaling 20                                        | 0 | 0 | 0 | 0 | 1 | 0 | 1 | 0 | hsa-miR-622 | -0.25 | N/A | Sites in UTR |
| MAFB    | NM_005461    | v-maf musculoaponeurotic fibrosarcoma oncogene homolog B (avian)           | 1 | 0 | 1 | 0 | 0 | 0 | 0 | 0 | hsa-miR-622 | -0.25 | N/A | Sites in UTR |
| BTG1    | NM_001731    | B-cell translocation gene 1, anti-proliferative                            | 1 | 0 | 0 | 1 | 1 | 0 | 1 | 0 | hsa-miR-622 | -0.25 | N/A | Sites in UTR |
| PURB    | NM_033224    | purine-rich element binding protein B                                      | 0 | 0 | 0 | 0 | 2 | 0 | 2 | 0 | hsa-miR-622 | -0.25 | N/A | Sites in UTR |
| TMF1    | NM_007114    | TATA element modulatory factor 1                                           | 0 | 0 | 0 | 0 | 2 | 0 | 2 | 0 | hsa-miR-622 | -0.25 | N/A | Sites in UTR |
| SATB1   | NM_001131010 | SATB homeobox 1                                                            | 1 | 0 | 1 | 0 | 0 | 0 | 0 | 0 | hsa-miR-622 | -0.25 | N/A | Sites in UTR |
| MAP7    | NM_001198608 | microtubule-associated protein 7                                           | 0 | 0 | 0 | 0 | 1 | 0 | 1 | 0 | hsa-miR-622 | -0.25 | N/A | Sites in UTR |
| FAM70A  | NM_001104544 | family with sequence similarity 70, member A                               | 0 | 0 | 0 | 0 | 1 | 0 | 1 | 0 | hsa-miR-622 | -0.25 | N/A | Sites in UTR |
| SLC28A3 | NM_001199633 | solute carrier family 28 (sodium-coupled nucleoside transporter), member 3 | 0 | 0 | 0 | 0 | 1 | 0 | 1 | 0 | hsa-miR-622 | -0.25 | N/A | Sites in UTR |
| TSEN15  | NM_001127394 | tRNA splicing endonuclease 15 homolog (S. cerevisiae)                      | 0 | 0 | 0 | 0 | 1 | 0 | 1 | 0 | hsa-miR-622 | -0.25 | N/A | Sites in UTR |
| ERO1LB  | NM_019891    | ERO1-like beta (S. cerevisiae)                                             | 0 | 0 | 0 | 0 | 2 | 0 | 0 | 2 | hsa-miR-622 | -0.25 | N/A | Sites in UTR |
| HIRA    | NM_003325    | HIR histone cell cycle regulation defective homolog A (S. cerevisiae)      | 0 | 0 | 0 | 0 | 1 | 1 | 0 | 0 | hsa-miR-622 | -0.25 | N/A | Sites in UTR |

|         |              |                                                                                     |   |   |   |   |   |   |   |   |             |       |     |              |
|---------|--------------|-------------------------------------------------------------------------------------|---|---|---|---|---|---|---|---|-------------|-------|-----|--------------|
| ABCC9   | NM_020297    | ATP-binding cassette, sub-family C (CFTR/MRP), member 9                             | 0 | 0 | 0 | 0 | 1 | 1 | 0 | 0 | hsa-miR-622 | -0.25 | N/A | Sites in UTR |
| SH2D4B  | NM_001145719 | SH2 domain containing 4B                                                            | 0 | 0 | 0 | 0 | 1 | 1 | 0 | 0 | hsa-miR-622 | -0.25 | N/A | Sites in UTR |
| MYLIP   | NM_013262    | myosin regulatory light chain interacting protein                                   | 0 | 0 | 0 | 0 | 1 | 1 | 0 | 0 | hsa-miR-622 | -0.25 | N/A | Sites in UTR |
| SLC11A2 | NM_000617    | solute carrier family 11 (proton-coupled divalent metal ion transporters), member 2 | 0 | 0 | 0 | 0 | 2 | 0 | 2 | 0 | hsa-miR-622 | -0.24 | N/A | Sites in UTR |
| SIM2    | NM_009586    | single-minded homolog 2 (Drosophila)                                                | 0 | 0 | 0 | 0 | 1 | 1 | 0 | 0 | hsa-miR-622 | -0.24 | N/A | Sites in UTR |
| CHSY1   | NM_014918    | chondroitin sulfate synthase 1                                                      | 0 | 0 | 0 | 0 | 1 | 1 | 0 | 0 | hsa-miR-622 | -0.24 | N/A | Sites in UTR |
| CCR5    | NM_000579    | chemokine (C-C motif) receptor 5                                                    | 0 | 0 | 0 | 0 | 1 | 1 | 0 | 0 | hsa-miR-622 | -0.24 | N/A | Sites in UTR |
| VTA1    | NM_016485    | Vps20-associated 1 homolog (S. cerevisiae)                                          | 0 | 0 | 0 | 0 | 1 | 1 | 0 | 0 | hsa-miR-622 | -0.24 | N/A | Sites in UTR |
| FAM129A | NM_052966    | family with sequence similarity 129, member A                                       | 0 | 0 | 0 | 0 | 3 | 0 | 1 | 2 | hsa-miR-622 | -0.24 | N/A | Sites in UTR |
| ABHD5   | NM_016006    | abhydrolase domain containing 5                                                     | 0 | 0 | 0 | 0 | 3 | 1 | 1 | 1 | hsa-miR-622 | -0.24 | N/A | Sites in UTR |
| ZNF48   | NM_001214906 | zinc finger protein 48                                                              | 0 | 0 | 0 | 0 | 1 | 0 | 1 | 0 | hsa-miR-622 | -0.24 | N/A | Sites in UTR |
| GAPVD1  | NM_015635    | GTPase activating protein and VPS9 domains 1                                        | 1 | 0 | 1 | 0 | 1 | 0 | 0 | 1 | hsa-miR-622 | -0.24 | N/A | Sites in UTR |
| SHISA2  | NM_001007538 | shisa homolog 2 (Xenopus laevis)                                                    | 0 | 0 | 0 | 0 | 2 | 0 | 1 | 1 | hsa-miR-622 | -0.24 | N/A | Sites in UTR |
| ZDHHC2  | NM_016353    | zinc finger, DHHC-type containing 2                                                 | 1 | 1 | 0 | 0 | 0 | 0 | 0 | 0 | hsa-miR-622 | -0.24 | N/A | Sites in UTR |
| FPR3    | NM_002030    | formyl peptide receptor 3                                                           | 0 | 0 | 0 | 0 | 1 | 0 | 1 | 0 | hsa-miR-622 | -0.24 | N/A | Sites in UTR |
| GHR     | NM_000163    | growth hormone receptor                                                             | 0 | 0 | 0 | 0 | 1 | 0 | 1 | 0 | hsa-miR-622 | -0.24 | N/A | Sites in UTR |
| NR3C1   | NM_000176    | nuclear receptor subfamily 3, group C, member 1 (glucocorticoid receptor)           | 0 | 0 | 0 | 0 | 1 | 0 | 1 | 0 | hsa-miR-622 | -0.24 | N/A | Sites in UTR |
| ATP5L   | NM_006476    | ATP synthase, H+ transporting, mitochondrial Fo complex, subunit G                  | 1 | 0 | 1 | 0 | 0 | 0 | 0 | 0 | hsa-miR-622 | -0.24 | N/A | Sites in UTR |

|          |              |                                                                             |   |   |   |   |   |   |   |   |             |       |     |              |
|----------|--------------|-----------------------------------------------------------------------------|---|---|---|---|---|---|---|---|-------------|-------|-----|--------------|
| SLC39A14 | NM_001128431 | solute carrier family 39 (zinc transporter), member 14                      | 0 | 0 | 0 | 0 | 1 | 0 | 1 | 0 | hsa-miR-622 | -0.24 | N/A | Sites in UTR |
| PCDH15   | NM_001142763 | protocadherin-related 15                                                    | 0 | 0 | 0 | 0 | 1 | 0 | 1 | 0 | hsa-miR-622 | -0.24 | N/A | Sites in UTR |
| SUV39H1  | NM_003173    | suppressor of variegation 3-9 homolog 1 (Drosophila)                        | 0 | 0 | 0 | 0 | 1 | 1 | 0 | 0 | hsa-miR-622 | -0.24 | N/A | Sites in UTR |
| DENND1A  | NM_020946    | DENN/MADD domain containing 1A                                              | 0 | 0 | 0 | 0 | 2 | 1 | 1 | 0 | hsa-miR-622 | -0.24 | N/A | Sites in UTR |
| ZBTB7B   | NM_015872    | zinc finger and BTB domain containing 7B                                    | 0 | 0 | 0 | 0 | 1 | 1 | 0 | 0 | hsa-miR-622 | -0.24 | N/A | Sites in UTR |
| CSorf47  | NM_001144954 | chromosome 5 open reading frame 47                                          | 0 | 0 | 0 | 0 | 1 | 0 | 1 | 0 | hsa-miR-622 | -0.24 | N/A | Sites in UTR |
| EZH1     | NM_001991    | enhancer of zeste homolog 1 (Drosophila)                                    | 1 | 1 | 0 | 0 | 1 | 0 | 0 | 1 | hsa-miR-622 | -0.24 | N/A | Sites in UTR |
| PAFAH1B1 | NM_000430    | platelet-activating factor acetylhydrolase 1b, regulatory subunit 1 (45kDa) | 1 | 0 | 1 | 0 | 0 | 0 | 0 | 0 | hsa-miR-622 | -0.24 | N/A | Sites in UTR |
| RRAGD    | NM_021244    | Ras-related GTP binding D                                                   | 0 | 0 | 0 | 0 | 1 | 0 | 1 | 0 | hsa-miR-622 | -0.24 | N/A | Sites in UTR |
| CDS2     | NM_003818    | CDP-diacylglycerol synthase (phosphatidate cytidyltransferase) 2            | 1 | 1 | 0 | 0 | 0 | 0 | 0 | 0 | hsa-miR-622 | -0.24 | N/A | Sites in UTR |
| NUDT16   | NM_001171905 | nudix (nucleoside diphosphate linked moiety X)-type motif 16                | 0 | 0 | 0 | 0 | 1 | 0 | 1 | 0 | hsa-miR-622 | -0.24 | N/A | Sites in UTR |
| CRK      | NM_005206    | v-crk sarcoma virus CT10 oncogene homolog (avian)                           | 0 | 0 | 0 | 0 | 2 | 0 | 1 | 1 | hsa-miR-622 | -0.24 | N/A | Sites in UTR |
| TSKU     | NM_015516    | tsukushi small leucine rich proteoglycan homolog (Xenopus laevis)           | 1 | 0 | 1 | 0 | 1 | 0 | 1 | 0 | hsa-miR-622 | -0.24 | N/A | Sites in UTR |
| ANO5     | NM_001142649 | anoctamin 5                                                                 | 0 | 0 | 0 | 0 | 3 | 0 | 0 | 3 | hsa-miR-622 | -0.24 | N/A | Sites in UTR |
| SLC38A2  | NM_018976    | solute carrier family 38, member 2                                          | 0 | 0 | 0 | 0 | 1 | 1 | 0 | 0 | hsa-miR-622 | -0.24 | N/A | Sites in UTR |
| SLAMF6   | NM_001184714 | SLAM family member 6                                                        | 0 | 0 | 0 | 0 | 2 | 1 | 0 | 1 | hsa-miR-622 | -0.24 | N/A | Sites in UTR |
| RIMBP2   | NM_015347    | RIMS binding protein 2                                                      | 1 | 0 | 1 | 0 | 0 | 0 | 0 | 0 | hsa-miR-622 | -0.24 | N/A | Sites in UTR |
| MAP1A    | NM_002373    | microtubule-associated protein 1A                                           | 0 | 0 | 0 | 0 | 1 | 1 | 0 | 0 | hsa-miR-622 | -0.24 | N/A | Sites in UTR |

|           |              |                                                                        |   |   |   |   |   |   |   |   |             |       |     |              |
|-----------|--------------|------------------------------------------------------------------------|---|---|---|---|---|---|---|---|-------------|-------|-----|--------------|
| XRCC3     | NM_001100118 | X-ray repair complementing defective repair in Chinese hamster cells 3 | 0 | 0 | 0 | 0 | 1 | 1 | 0 | 0 | hsa-miR-622 | -0.24 | N/A | Sites in UTR |
| COG8      | NM_032382    | component of oligomeric golgi complex 8                                | 0 | 0 | 0 | 0 | 1 | 1 | 0 | 0 | hsa-miR-622 | -0.24 | N/A | Sites in UTR |
| KRTAP13-2 | NM_181621    | keratin associated protein 13-2                                        | 0 | 0 | 0 | 0 | 1 | 0 | 1 | 0 | hsa-miR-622 | -0.24 | N/A | Sites in UTR |
| PSEN1     | NM_000021    | presenilin 1                                                           | 1 | 0 | 1 | 0 | 0 | 0 | 0 | 0 | hsa-miR-622 | -0.23 | N/A | Sites in UTR |
| RGS1      | NM_002922    | regulator of G-protein signaling 1                                     | 0 | 0 | 0 | 0 | 1 | 0 | 1 | 0 | hsa-miR-622 | -0.23 | N/A | Sites in UTR |
| SDC2      | NM_002998    | syndecan 2                                                             | 0 | 0 | 0 | 0 | 2 | 0 | 1 | 1 | hsa-miR-622 | -0.23 | N/A | Sites in UTR |
| PAFAH2    | NM_000437    | platelet-activating factor acetylhydrolase 2, 40kDa                    | 0 | 0 | 0 | 0 | 1 | 1 | 0 | 0 | hsa-miR-622 | -0.23 | N/A | Sites in UTR |
| RARG      | NM_000966    | retinoic acid receptor, gamma                                          | 1 | 1 | 0 | 0 | 0 | 0 | 0 | 0 | hsa-miR-622 | -0.23 | N/A | Sites in UTR |
| SFRP2     | NM_003013    | secreted frizzled-related protein 2                                    | 0 | 0 | 0 | 0 | 1 | 1 | 0 | 0 | hsa-miR-622 | -0.23 | N/A | Sites in UTR |
| ATP5L2    | NM_001165877 | ATP synthase, H+ transporting, mitochondrial Fo complex, subunit G2    | 0 | 0 | 0 | 0 | 1 | 0 | 1 | 0 | hsa-miR-622 | -0.23 | N/A | Sites in UTR |
| CD300E    | NM_181449    | CD300e molecule                                                        | 1 | 0 | 1 | 0 | 0 | 0 | 0 | 0 | hsa-miR-622 | -0.23 | N/A | Sites in UTR |
| ARSI      | NM_001012301 | arylsulfatase family, member I                                         | 0 | 0 | 0 | 0 | 2 | 0 | 2 | 0 | hsa-miR-622 | -0.23 | N/A | Sites in UTR |
| C3orf43   | NM_001077657 | chromosome 3 open reading frame 43                                     | 0 | 0 | 0 | 0 | 1 | 1 | 0 | 0 | hsa-miR-622 | -0.23 | N/A | Sites in UTR |
| C1orf131  | NM_152379    | chromosome 1 open reading frame 131                                    | 0 | 0 | 0 | 0 | 1 | 0 | 1 | 0 | hsa-miR-622 | -0.23 | N/A | Sites in UTR |
| DSC3      | NM_001941    | desmocollin 3                                                          | 0 | 0 | 0 | 0 | 2 | 0 | 0 | 2 | hsa-miR-622 | -0.23 | N/A | Sites in UTR |
| POU4F1    | NM_006237    | POU class 4 homeobox 1                                                 | 1 | 0 | 0 | 1 | 1 | 0 | 1 | 0 | hsa-miR-622 | -0.23 | N/A | Sites in UTR |
| COTL1     | NM_021149    | coactosin-like 1 (Dictyostelium)                                       | 0 | 0 | 0 | 0 | 1 | 1 | 0 | 0 | hsa-miR-622 | -0.23 | N/A | Sites in UTR |
| PRRC2B    | NM_013318    | proline-rich coiled-coil 2B                                            | 0 | 0 | 0 | 0 | 1 | 1 | 0 | 0 | hsa-miR-622 | -0.23 | N/A | Sites in UTR |



|        |              |                                                                                        |   |   |   |   |   |   |   |   |             |       |     |              |
|--------|--------------|----------------------------------------------------------------------------------------|---|---|---|---|---|---|---|---|-------------|-------|-----|--------------|
| PRDM4  | NM_012406    | PR domain containing 4                                                                 | 0 | 0 | 0 | 0 | 1 | 0 | 1 | 0 | hsa-miR-622 | -0.23 | N/A | Sites in UTR |
| ZNF260 | NM_001012756 | zinc finger protein 260                                                                | 0 | 0 | 0 | 0 | 2 | 0 | 0 | 2 | hsa-miR-622 | -0.23 | N/A | Sites in UTR |
| TPD52  | NM_001025252 | tumor protein D52                                                                      | 0 | 0 | 0 | 0 | 1 | 1 | 0 | 0 | hsa-miR-622 | -0.23 | N/A | Sites in UTR |
| MEX3A  | NM_001093725 | mex-3 homolog A (C. elegans)                                                           | 0 | 0 | 0 | 0 | 1 | 1 | 0 | 0 | hsa-miR-622 | -0.23 | N/A | Sites in UTR |
| ZNF865 | NM_001195605 | zinc finger protein 865                                                                | 0 | 0 | 0 | 0 | 2 | 1 | 0 | 1 | hsa-miR-622 | -0.23 | N/A | Sites in UTR |
| TAF7   | NM_005642    | TAF7 RNA polymerase II, TATA box binding protein (TBP)-associated factor, 55kDa        | 0 | 0 | 0 | 0 | 1 | 0 | 1 | 0 | hsa-miR-622 | -0.23 | N/A | Sites in UTR |
| TECPR2 | NM_001172631 | tectonin beta-propeller repeat containing 2                                            | 0 | 0 | 0 | 0 | 1 | 0 | 1 | 0 | hsa-miR-622 | -0.23 | N/A | Sites in UTR |
| MYL12A | NM_006471    | myosin, light chain 12A, regulatory, non-sarcomeric                                    | 1 | 0 | 1 | 0 | 0 | 0 | 0 | 0 | hsa-miR-622 | -0.23 | N/A | Sites in UTR |
| WFDC8  | NM_181510    | WAP four-disulfide core domain 8                                                       | 0 | 0 | 0 | 0 | 1 | 0 | 1 | 0 | hsa-miR-622 | -0.23 | N/A | Sites in UTR |
| EN1    | NM_001426    | engrailed homeobox 1                                                                   | 2 | 0 | 1 | 1 | 0 | 0 | 0 | 0 | hsa-miR-622 | -0.23 | N/A | Sites in UTR |
| SIAH3  | NM_198849    | seven in absentia homolog 3 (Drosophila)                                               | 0 | 0 | 0 | 0 | 2 | 0 | 1 | 1 | hsa-miR-622 | -0.23 | N/A | Sites in UTR |
| NEDD4L | NM_001144964 | neural precursor cell expressed, developmentally down-regulated 4-like                 | 0 | 0 | 0 | 0 | 1 | 1 | 0 | 0 | hsa-miR-622 | -0.23 | N/A | Sites in UTR |
| TRIB2  | NM_021643    | tribbles homolog 2 (Drosophila)                                                        | 1 | 1 | 0 | 0 | 0 | 0 | 0 | 0 | hsa-miR-622 | -0.23 | N/A | Sites in UTR |
| RHD    | NM_001127691 | Rh blood group, D antigen                                                              | 0 | 0 | 0 | 0 | 1 | 0 | 1 | 0 | hsa-miR-622 | -0.23 | N/A | Sites in UTR |
| UBE2J1 | NM_016021    | ubiquitin-conjugating enzyme E2, J1, U                                                 | 0 | 0 | 0 | 0 | 1 | 0 | 1 | 0 | hsa-miR-622 | -0.23 | N/A | Sites in UTR |
| SEH1L  | NM_001013437 | SEH1-like (S. cerevisiae)                                                              | 0 | 0 | 0 | 0 | 1 | 0 | 1 | 0 | hsa-miR-622 | -0.23 | N/A | Sites in UTR |
| SEC16A | NM_014866    | SEC16 homolog A (S. cerevisiae)                                                        | 0 | 0 | 0 | 0 | 2 | 0 | 0 | 2 | hsa-miR-622 | -0.23 | N/A | Sites in UTR |
| CTDSPL | NM_001008392 | CTD (carboxy-terminal domain, RNA polymerase II, polypeptide A) small phosphatase-like | 0 | 0 | 0 | 0 | 1 | 1 | 0 | 0 | hsa-miR-622 | -0.23 | N/A | Sites in UTR |

|         |              |                                                                          |   |   |   |   |   |   |   |   |             |       |     |              |
|---------|--------------|--------------------------------------------------------------------------|---|---|---|---|---|---|---|---|-------------|-------|-----|--------------|
| PARP6   | NM_020214    | poly (ADP-ribose) polymerase family, member 6                            | 0 | 0 | 0 | 0 | 1 | 1 | 0 | 0 | hsa-miR-622 | -0.23 | N/A | Sites in UTR |
| SLCO2A1 | NM_005630    | solute carrier organic anion transporter family, member 2A1              | 0 | 0 | 0 | 0 | 2 | 1 | 0 | 1 | hsa-miR-622 | -0.23 | N/A | Sites in UTR |
| KLF3    | NM_016531    | Kruppel-like factor 3 (basic)                                            | 1 | 0 | 0 | 1 | 1 | 0 | 1 | 0 | hsa-miR-622 | -0.23 | N/A | Sites in UTR |
| WSB1    | NM_015626    | WD repeat and SOCS box containing 1                                      | 0 | 0 | 0 | 0 | 1 | 1 | 0 | 0 | hsa-miR-622 | -0.23 | N/A | Sites in UTR |
| SLC14A1 | NM_001128588 | solute carrier family 14 (urea transporter), member 1 (Kidd blood group) | 0 | 0 | 0 | 0 | 2 | 1 | 0 | 1 | hsa-miR-622 | -0.23 | N/A | Sites in UTR |
| PHTF2   | NM_001127357 | putative homeodomain transcription factor 2                              | 0 | 0 | 0 | 0 | 1 | 0 | 1 | 0 | hsa-miR-622 | -0.23 | N/A | Sites in UTR |
| KLHL14  | NM_020805    | kelch-like 14 (Drosophila)                                               | 1 | 0 | 1 | 0 | 0 | 0 | 0 | 0 | hsa-miR-622 | -0.23 | N/A | Sites in UTR |
| FAM110C | NM_001077710 | family with sequence similarity 110, member C                            | 0 | 0 | 0 | 0 | 1 | 0 | 1 | 0 | hsa-miR-622 | -0.23 | N/A | Sites in UTR |
| CCDC86  | NM_024098    | coiled-coil domain containing 86                                         | 0 | 0 | 0 | 0 | 1 | 1 | 0 | 0 | hsa-miR-622 | -0.23 | N/A | Sites in UTR |
| CCNG1   | NM_004060    | cyclin G1                                                                | 0 | 0 | 0 | 0 | 1 | 0 | 1 | 0 | hsa-miR-622 | -0.23 | N/A | Sites in UTR |
| EPHA7   | NM_004440    | EPH receptor A7                                                          | 0 | 0 | 0 | 0 | 1 | 0 | 1 | 0 | hsa-miR-622 | -0.23 | N/A | Sites in UTR |
| IRF2    | NM_002199    | interferon regulatory factor 2                                           | 0 | 0 | 0 | 0 | 1 | 0 | 1 | 0 | hsa-miR-622 | -0.23 | N/A | Sites in UTR |
| NPY1R   | NM_000909    | neuropeptide Y receptor Y1                                               | 0 | 0 | 0 | 0 | 1 | 0 | 1 | 0 | hsa-miR-622 | -0.23 | N/A | Sites in UTR |
| PKD1L1  | NM_138295    | polycystic kidney disease 1 like 1                                       | 0 | 0 | 0 | 0 | 1 | 0 | 1 | 0 | hsa-miR-622 | -0.23 | N/A | Sites in UTR |
| BCAT1   | NM_001178091 | branched chain amino-acid transaminase 1, cytosolic                      | 0 | 0 | 0 | 0 | 2 | 0 | 1 | 1 | hsa-miR-622 | -0.23 | N/A | Sites in UTR |
| TMEM100 | NM_001099640 | transmembrane protein 100                                                | 0 | 0 | 0 | 0 | 2 | 0 | 1 | 1 | hsa-miR-622 | -0.23 | N/A | Sites in UTR |
| RNF125  | NM_017831    | ring finger protein 125                                                  | 1 | 1 | 0 | 0 | 1 | 0 | 0 | 1 | hsa-miR-622 | -0.23 | N/A | Sites in UTR |
| OSMR    | NM_001168355 | oncostatin M receptor                                                    | 0 | 0 | 0 | 0 | 1 | 0 | 1 | 0 | hsa-miR-622 | -0.23 | N/A | Sites in UTR |

|          |              |                                                                                       |   |   |   |   |   |   |   |   |             |       |     |              |
|----------|--------------|---------------------------------------------------------------------------------------|---|---|---|---|---|---|---|---|-------------|-------|-----|--------------|
| C9orf80  | NM_021218    | chromosome 9 open reading frame 80                                                    | 0 | 0 | 0 | 0 | 1 | 0 | 1 | 0 | hsa-miR-622 | -0.23 | N/A | Sites in UTR |
| CFHR5    | NM_030787    | complement factor H-related 5                                                         | 0 | 0 | 0 | 0 | 1 | 0 | 1 | 0 | hsa-miR-622 | -0.23 | N/A | Sites in UTR |
| ACBD5    | NM_001042473 | acyl-CoA binding domain containing 5                                                  | 0 | 0 | 0 | 0 | 1 | 1 | 0 | 0 | hsa-miR-622 | -0.23 | N/A | Sites in UTR |
| ACAT1    | NM_000019    | acetyl-CoA acetyltransferase 1                                                        | 0 | 0 | 0 | 0 | 1 | 0 | 1 | 0 | hsa-miR-622 | -0.23 | N/A | Sites in UTR |
| FABP2    | NM_000134    | fatty acid binding protein 2, intestinal                                              | 0 | 0 | 0 | 0 | 1 | 0 | 1 | 0 | hsa-miR-622 | -0.23 | N/A | Sites in UTR |
| POLR2H   | NM_006232    | polymerase (RNA) II (DNA directed) polypeptide H                                      | 0 | 0 | 0 | 0 | 1 | 0 | 1 | 0 | hsa-miR-622 | -0.23 | N/A | Sites in UTR |
| EGFR     | NM_005228    | epidermal growth factor receptor                                                      | 0 | 0 | 0 | 0 | 2 | 0 | 1 | 1 | hsa-miR-622 | -0.23 | N/A | Sites in UTR |
| CLDN5    | NM_001130861 | claudin 5                                                                             | 0 | 0 | 0 | 0 | 1 | 1 | 0 | 0 | hsa-miR-622 | -0.23 | N/A | Sites in UTR |
| DCUN1D5  | NM_032299    | DCN1, defective in cullin neddylation 1, domain containing 5 ( <i>S. cerevisiae</i> ) | 1 | 0 | 0 | 1 | 2 | 0 | 1 | 1 | hsa-miR-622 | -0.22 | N/A | Sites in UTR |
| LSM1     | NM_014462    | LSM1 homolog, U6 small nuclear RNA associated ( <i>S. cerevisiae</i> )                | 0 | 0 | 0 | 0 | 1 | 0 | 1 | 0 | hsa-miR-622 | -0.22 | N/A | Sites in UTR |
| ZNF436   | NM_001077195 | zinc finger protein 436                                                               | 0 | 0 | 0 | 0 | 2 | 0 | 1 | 1 | hsa-miR-622 | -0.22 | N/A | Sites in UTR |
| CLEC12B  | NM_205852    | C-type lectin domain family 12, member B                                              | 0 | 0 | 0 | 0 | 3 | 0 | 0 | 3 | hsa-miR-622 | -0.22 | N/A | Sites in UTR |
| DPP10    | NM_001004360 | dipeptidyl-peptidase 10 (non-functional)                                              | 0 | 0 | 0 | 0 | 1 | 1 | 0 | 0 | hsa-miR-622 | -0.22 | N/A | Sites in UTR |
| TMCO1    | NM_019026    | transmembrane and coiled-coil domains 1                                               | 1 | 0 | 1 | 0 | 1 | 0 | 1 | 0 | hsa-miR-622 | -0.22 | N/A | Sites in UTR |
| DDHD1    | NM_001160147 | DDHD domain containing 1                                                              | 0 | 0 | 0 | 0 | 3 | 0 | 3 | 0 | hsa-miR-622 | -0.22 | N/A | Sites in UTR |
| DYNC1LI2 | NM_006141    | dynein, cytoplasmic 1, light intermediate chain 2                                     | 0 | 0 | 0 | 0 | 1 | 0 | 1 | 0 | hsa-miR-622 | -0.22 | N/A | Sites in UTR |
| RAB28    | NM_001017979 | RAB28, member RAS oncogene family                                                     | 0 | 0 | 0 | 0 | 1 | 0 | 1 | 0 | hsa-miR-622 | -0.22 | N/A | Sites in UTR |
| NT5DC3   | NM_001031701 | 5'-nucleotidase domain containing 3                                                   | 0 | 0 | 0 | 0 | 2 | 1 | 1 | 0 | hsa-miR-622 | -0.22 | N/A | Sites in UTR |

|         |              |                                                                                   |   |   |   |   |   |   |   |   |             |       |     |              |
|---------|--------------|-----------------------------------------------------------------------------------|---|---|---|---|---|---|---|---|-------------|-------|-----|--------------|
| HES2    | NM_019089    | hairy and enhancer of split 2 (Drosophila)                                        | 1 | 1 | 0 | 0 | 1 | 0 | 0 | 1 | hsa-miR-622 | -0.22 | N/A | Sites in UTR |
| USP10   | NM_005153    | ubiquitin specific peptidase 10                                                   | 0 | 0 | 0 | 0 | 1 | 0 | 1 | 0 | hsa-miR-622 | -0.22 | N/A | Sites in UTR |
| RAB25   | NM_020387    | RAB25, member RAS oncogene family                                                 | 0 | 0 | 0 | 0 | 1 | 0 | 1 | 0 | hsa-miR-622 | -0.22 | N/A | Sites in UTR |
| CDH5    | NM_001795    | cadherin 5, type 2 (vascular endothelium)                                         | 0 | 0 | 0 | 0 | 2 | 0 | 1 | 1 | hsa-miR-622 | -0.22 | N/A | Sites in UTR |
| LYRM7   | NM_181705    | Lyrm7 homolog (mouse)                                                             | 0 | 0 | 0 | 0 | 2 | 1 | 0 | 1 | hsa-miR-622 | -0.22 | N/A | Sites in UTR |
| RALGPS1 | NM_014636    | Ral GEF with PH domain and SH3 binding motif 1                                    | 1 | 1 | 0 | 0 | 2 | 1 | 0 | 1 | hsa-miR-622 | -0.22 | N/A | Sites in UTR |
| API5    | NM_001142930 | apoptosis inhibitor 5                                                             | 0 | 0 | 0 | 0 | 1 | 0 | 1 | 0 | hsa-miR-622 | -0.22 | N/A | Sites in UTR |
| LPAR2   | NM_004720    | lysophosphatidic acid receptor 2                                                  | 0 | 0 | 0 | 0 | 2 | 0 | 1 | 1 | hsa-miR-622 | -0.22 | N/A | Sites in UTR |
| LRAT    | NM_004744    | lecithin retinol acyltransferase (phosphatidylcholine--retinol O-acyltransferase) | 0 | 0 | 0 | 0 | 1 | 1 | 0 | 0 | hsa-miR-622 | -0.22 | N/A | Sites in UTR |
| BST1    | NM_004334    | bone marrow stromal cell antigen 1                                                | 0 | 0 | 0 | 0 | 1 | 0 | 1 | 0 | hsa-miR-622 | -0.22 | N/A | Sites in UTR |
| EIF2B1  | NM_001414    | eukaryotic translation initiation factor 2B, subunit 1 alpha, 26kDa               | 1 | 1 | 0 | 0 | 0 | 0 | 0 | 0 | hsa-miR-622 | -0.22 | N/A | Sites in UTR |
| PRRX1   | NM_006902    | paired related homeobox 1                                                         | 0 | 0 | 0 | 0 | 1 | 1 | 0 | 0 | hsa-miR-622 | -0.22 | N/A | Sites in UTR |
| ZC3H10  | NM_032786    | zinc finger CCCH-type containing 10                                               | 1 | 1 | 0 | 0 | 0 | 0 | 0 | 0 | hsa-miR-622 | -0.22 | N/A | Sites in UTR |
| ATXN7L1 | NM_020725    | ataxin 7-like 1                                                                   | 1 | 1 | 0 | 0 | 0 | 0 | 0 | 0 | hsa-miR-622 | -0.22 | N/A | Sites in UTR |
| HYAL1   | NM_007312    | hyaluronoglucosaminidase 1                                                        | 0 | 0 | 0 | 0 | 1 | 0 | 1 | 0 | hsa-miR-622 | -0.22 | N/A | Sites in UTR |
| LYZ     | NM_000239    | lysozyme                                                                          | 0 | 0 | 0 | 0 | 1 | 0 | 1 | 0 | hsa-miR-622 | -0.22 | N/A | Sites in UTR |
| SLC37A1 | NM_018964    | solute carrier family 37 (glycerol-3-phosphate transporter), member 1             | 0 | 0 | 0 | 0 | 1 | 0 | 1 | 0 | hsa-miR-622 | -0.22 | N/A | Sites in UTR |
| ZFYVE20 | NM_022340    | zinc finger, FYVE domain containing 20                                            | 0 | 0 | 0 | 0 | 1 | 0 | 1 | 0 | hsa-miR-622 | -0.22 | N/A | Sites in UTR |

|              |              |                                                                  |   |   |   |   |   |   |   |   |             |       |     |              |
|--------------|--------------|------------------------------------------------------------------|---|---|---|---|---|---|---|---|-------------|-------|-----|--------------|
| ALCAM        | NM_001627    | activated leukocyte cell adhesion molecule                       | 0 | 0 | 0 | 0 | 1 | 1 | 0 | 0 | hsa-miR-622 | -0.22 | N/A | Sites in UTR |
| SH2D7        | NM_001101404 | SH2 domain containing 7                                          | 0 | 0 | 0 | 0 | 1 | 1 | 0 | 0 | hsa-miR-622 | -0.22 | N/A | Sites in UTR |
| DGKG         | NM_001080744 | diacylglycerol kinase, gamma 90kDa                               | 0 | 0 | 0 | 0 | 2 | 1 | 0 | 1 | hsa-miR-622 | -0.22 | N/A | Sites in UTR |
| VPS24        | NM_001005753 | vacuolar protein sorting 24 homolog ( <i>S. cerevisiae</i> )     | 0 | 0 | 0 | 0 | 1 | 0 | 1 | 0 | hsa-miR-622 | -0.22 | N/A | Sites in UTR |
| RNF103-VPS24 | NM_001198954 | RNF103-VPS24 readthrough                                         | 0 | 0 | 0 | 0 | 1 | 0 | 1 | 0 | hsa-miR-622 | -0.22 | N/A | Sites in UTR |
| PDE7A        | NM_002604    | phosphodiesterase 7A                                             | 0 | 0 | 0 | 0 | 1 | 1 | 0 | 0 | hsa-miR-622 | -0.22 | N/A | Sites in UTR |
| ISM1         | NM_080826    | isthmin 1 homolog (zebrafish)                                    | 0 | 0 | 0 | 0 | 2 | 0 | 1 | 1 | hsa-miR-622 | -0.22 | N/A | Sites in UTR |
| NDRG3        | NM_022477    | NDRG family member 3                                             | 0 | 0 | 0 | 0 | 1 | 0 | 1 | 0 | hsa-miR-622 | -0.22 | N/A | Sites in UTR |
| HTRA4        | NM_153692    | HtrA serine peptidase 4                                          | 0 | 0 | 0 | 0 | 1 | 0 | 1 | 0 | hsa-miR-622 | -0.22 | N/A | Sites in UTR |
| C9orf3       | NM_001193331 | chromosome 9 open reading frame 3                                | 0 | 0 | 0 | 0 | 2 | 0 | 0 | 2 | hsa-miR-622 | -0.22 | N/A | Sites in UTR |
| THUMP3       | NM_001114092 | THUMP domain containing 3                                        | 0 | 0 | 0 | 0 | 2 | 0 | 1 | 1 | hsa-miR-622 | -0.22 | N/A | Sites in UTR |
| HBEGF        | NM_001945    | heparin-binding EGF-like growth factor                           | 0 | 0 | 0 | 0 | 1 | 0 | 1 | 0 | hsa-miR-622 | -0.21 | N/A | Sites in UTR |
| DKK2         | NM_014421    | dickkopf homolog 2 ( <i>Xenopus laevis</i> )                     | 1 | 0 | 1 | 0 | 0 | 0 | 0 | 0 | hsa-miR-622 | -0.21 | N/A | Sites in UTR |
| FGF3         | NM_005247    | fibroblast growth factor 3                                       | 0 | 0 | 0 | 0 | 1 | 1 | 0 | 0 | hsa-miR-622 | -0.21 | N/A | Sites in UTR |
| COL4A3BP     | NM_001130105 | collagen, type IV, alpha 3 (Goodpasture antigen) binding protein | 0 | 0 | 0 | 0 | 1 | 1 | 0 | 0 | hsa-miR-622 | -0.21 | N/A | Sites in UTR |
| GFAP         | NM_002055    | glial fibrillary acidic protein                                  | 0 | 0 | 0 | 0 | 4 | 0 | 3 | 1 | hsa-miR-622 | -0.21 | N/A | Sites in UTR |
| GP5          | NM_004488    | glycoprotein V (platelet)                                        | 0 | 0 | 0 | 0 | 1 | 0 | 1 | 0 | hsa-miR-622 | -0.21 | N/A | Sites in UTR |
| PRSS8        | NM_002773    | protease, serine, 8                                              | 0 | 0 | 0 | 0 | 1 | 1 | 0 | 0 | hsa-miR-622 | -0.21 | N/A | Sites in UTR |

|         |              |                                                                                       |   |   |   |   |   |   |   |   |             |       |     |              |
|---------|--------------|---------------------------------------------------------------------------------------|---|---|---|---|---|---|---|---|-------------|-------|-----|--------------|
| ALDH4A1 | NM_001161504 | aldehyde dehydrogenase 4 family, member A1                                            | 0 | 0 | 0 | 0 | 1 | 1 | 0 | 0 | hsa-miR-622 | -0.21 | N/A | Sites in UTR |
| ZNF234  | NM_001144824 | zinc finger protein 234                                                               | 0 | 0 | 0 | 0 | 1 | 1 | 0 | 0 | hsa-miR-622 | -0.21 | N/A | Sites in UTR |
| ATXN1   | NM_000332    | ataxin 1                                                                              | 0 | 0 | 0 | 0 | 2 | 1 | 1 | 0 | hsa-miR-622 | -0.21 | N/A | Sites in UTR |
| PRR11   | NM_018304    | proline rich 11                                                                       | 0 | 0 | 0 | 0 | 5 | 0 | 0 | 5 | hsa-miR-622 | -0.21 | N/A | Sites in UTR |
| SNRNP40 | NM_004814    | small nuclear ribonucleoprotein 40kDa (U5)                                            | 0 | 0 | 0 | 0 | 1 | 0 | 1 | 0 | hsa-miR-622 | -0.21 | N/A | Sites in UTR |
| MFSD4   | NM_181644    | major facilitator superfamily domain containing 4                                     | 0 | 0 | 0 | 0 | 2 | 0 | 1 | 1 | hsa-miR-622 | -0.21 | N/A | Sites in UTR |
| TNFRSF9 | NM_001561    | tumor necrosis factor receptor superfamily, member 9                                  | 0 | 0 | 0 | 0 | 2 | 0 | 2 | 0 | hsa-miR-622 | -0.21 | N/A | Sites in UTR |
| CYFIP2  | NM_001037332 | cytoplasmic FMR1 interacting protein 2                                                | 0 | 0 | 0 | 0 | 4 | 0 | 1 | 3 | hsa-miR-622 | -0.21 | N/A | Sites in UTR |
| U2SURP  | NM_001080415 | U2 snRNP-associated SURP domain containing                                            | 0 | 0 | 0 | 0 | 1 | 0 | 1 | 0 | hsa-miR-622 | -0.21 | N/A | Sites in UTR |
| TGIF1   | NM_003244    | TGFB-induced factor homeobox 1                                                        | 1 | 0 | 1 | 0 | 0 | 0 | 0 | 0 | hsa-miR-622 | -0.21 | N/A | Sites in UTR |
| TMEM233 | NM_001136534 | transmembrane protein 233                                                             | 1 | 0 | 1 | 0 | 0 | 0 | 0 | 0 | hsa-miR-622 | -0.21 | N/A | Sites in UTR |
| HTR2C   | NM_000868    | 5-hydroxytryptamine (serotonin) receptor 2C                                           | 1 | 0 | 1 | 0 | 0 | 0 | 0 | 0 | hsa-miR-622 | -0.21 | N/A | Sites in UTR |
| MRPL9   | NM_031420    | mitochondrial ribosomal protein L9                                                    | 0 | 0 | 0 | 0 | 1 | 0 | 1 | 0 | hsa-miR-622 | -0.21 | N/A | Sites in UTR |
| MYL12B  | NM_001144944 | myosin, light chain 12B, regulatory                                                   | 0 | 0 | 0 | 0 | 1 | 0 | 1 | 0 | hsa-miR-622 | -0.21 | N/A | Sites in UTR |
| SAMD4B  | NM_018028    | sterile alpha motif domain containing 4B                                              | 0 | 0 | 0 | 0 | 3 | 0 | 3 | 0 | hsa-miR-622 | -0.21 | N/A | Sites in UTR |
| ERCC6   | NM_000124    | excision repair cross-complementing rodent repair deficiency, complementation group 6 | 0 | 0 | 0 | 0 | 1 | 0 | 1 | 0 | hsa-miR-622 | -0.21 | N/A | Sites in UTR |
| AXIN2   | NM_004655    | axin 2                                                                                | 0 | 0 | 0 | 0 | 1 | 0 | 1 | 0 | hsa-miR-622 | -0.21 | N/A | Sites in UTR |
| RNF24   | NM_001134337 | ring finger protein 24                                                                | 1 | 0 | 1 | 0 | 0 | 0 | 0 | 0 | hsa-miR-622 | -0.21 | N/A | Sites in UTR |

|          |              |                                                                                                                                |   |   |   |   |   |   |   |   |             |       |     |              |
|----------|--------------|--------------------------------------------------------------------------------------------------------------------------------|---|---|---|---|---|---|---|---|-------------|-------|-----|--------------|
| SDCBP2   | NM_001199784 | syndecan binding protein (syntenin) 2                                                                                          | 0 | 0 | 0 | 0 | 1 | 0 | 1 | 0 | hsa-miR-622 | -0.21 | N/A | Sites in UTR |
| HEATR1   | NM_018072    | HEAT repeat containing 1                                                                                                       | 0 | 0 | 0 | 0 | 1 | 0 | 1 | 0 | hsa-miR-622 | -0.21 | N/A | Sites in UTR |
| MYO5C    | NM_018728    | myosin VC                                                                                                                      | 0 | 0 | 0 | 0 | 1 | 0 | 1 | 0 | hsa-miR-622 | -0.21 | N/A | Sites in UTR |
| PMPCB    | NM_004279    | peptidase (mitochondrial processing) beta                                                                                      | 0 | 0 | 0 | 0 | 2 | 0 | 2 | 0 | hsa-miR-622 | -0.21 | N/A | Sites in UTR |
| RPUSD4   | NM_001144827 | RNA pseudouridylyate synthase domain containing 4                                                                              | 0 | 0 | 0 | 0 | 2 | 0 | 2 | 0 | hsa-miR-622 | -0.21 | N/A | Sites in UTR |
| HAPLN4   | NM_023002    | hyaluronan and proteoglycan link protein 4                                                                                     | 0 | 0 | 0 | 0 | 2 | 1 | 0 | 1 | hsa-miR-622 | -0.21 | N/A | Sites in UTR |
| RB1      | NM_000321    | retinoblastoma 1                                                                                                               | 0 | 0 | 0 | 0 | 1 | 0 | 1 | 0 | hsa-miR-622 | -0.21 | N/A | Sites in UTR |
| USP25    | NM_013396    | ubiquitin specific peptidase 25                                                                                                | 1 | 0 | 1 | 0 | 0 | 0 | 0 | 0 | hsa-miR-622 | -0.21 | N/A | Sites in UTR |
| CHRFAM7A | NM_139320    | CHRNA7 (cholinergic receptor, nicotinic, alpha 7, exons 5-10) and FAM7A (family with sequence similarity 7A, exons A-E) fusion | 0 | 0 | 0 | 0 | 1 | 0 | 1 | 0 | hsa-miR-622 | -0.21 | N/A | Sites in UTR |
| C9orf91  | NM_153045    | chromosome 9 open reading frame 91                                                                                             | 1 | 0 | 0 | 1 | 1 | 0 | 1 | 0 | hsa-miR-622 | -0.21 | N/A | Sites in UTR |
| HOXB9    | NM_024017    | homeobox B9                                                                                                                    | 0 | 0 | 0 | 0 | 2 | 0 | 2 | 0 | hsa-miR-622 | -0.21 | N/A | Sites in UTR |
| SIRPB1   | NM_001135844 | signal-regulatory protein beta 1                                                                                               | 0 | 0 | 0 | 0 | 1 | 1 | 0 | 0 | hsa-miR-622 | -0.21 | N/A | Sites in UTR |
| PSMD13   | NM_002817    | proteasome (prosome, macropain) 26S subunit, non-ATPase, 13                                                                    | 0 | 0 | 0 | 0 | 1 | 0 | 1 | 0 | hsa-miR-622 | -0.21 | N/A | Sites in UTR |
| UQCR11   | NM_006830    | ubiquinol-cytochrome c reductase, complex III subunit XI                                                                       | 0 | 0 | 0 | 0 | 1 | 0 | 1 | 0 | hsa-miR-622 | -0.21 | N/A | Sites in UTR |
| SLC16A10 | NM_018593    | solute carrier family 16, member 10 (aromatic amino acid transporter)                                                          | 1 | 0 | 1 | 0 | 0 | 0 | 0 | 0 | hsa-miR-622 | -0.21 | N/A | Sites in UTR |
| PRR23C   | NM_001134657 | proline rich 23C                                                                                                               | 0 | 0 | 0 | 0 | 1 | 0 | 1 | 0 | hsa-miR-622 | -0.21 | N/A | Sites in UTR |
| MTRNR2L7 | NM_001190489 | MT-RNR2-like 7                                                                                                                 | 0 | 0 | 0 | 0 | 1 | 0 | 1 | 0 | hsa-miR-622 | -0.21 | N/A | Sites in UTR |
| DCDC5    | NM_020869    | doublecortin domain containing 5                                                                                               | 0 | 0 | 0 | 0 | 1 | 0 | 1 | 0 | hsa-miR-622 | -0.21 | N/A | Sites in UTR |

|          |              |                                                                                           |   |   |   |   |   |   |   |   |             |       |     |              |
|----------|--------------|-------------------------------------------------------------------------------------------|---|---|---|---|---|---|---|---|-------------|-------|-----|--------------|
| YWHAG    | NM_012479    | tyrosine 3-monooxygenase/tryptophan 5-monooxygenase activation protein, gamma polypeptide | 0 | 0 | 0 | 0 | 1 | 1 | 0 | 0 | hsa-miR-622 | -0.21 | N/A | Sites in UTR |
| FRMD4A   | NM_018027    | FERM domain containing 4A                                                                 | 0 | 0 | 0 | 0 | 2 | 1 | 0 | 1 | hsa-miR-622 | -0.21 | N/A | Sites in UTR |
| ATP1B3   | NM_001679    | ATPase, Na <sup>+</sup> /K <sup>+</sup> transporting, beta 3 polypeptide                  | 0 | 0 | 0 | 0 | 1 | 0 | 1 | 0 | hsa-miR-622 | -0.21 | N/A | Sites in UTR |
| LAMC2    | NM_005562    | laminin, gamma 2                                                                          | 0 | 0 | 0 | 0 | 1 | 0 | 1 | 0 | hsa-miR-622 | -0.2  | N/A | Sites in UTR |
| PAX1     | NM_006192    | paired box 1                                                                              | 0 | 0 | 0 | 0 | 1 | 0 | 1 | 0 | hsa-miR-622 | -0.2  | N/A | Sites in UTR |
| APOBEC3F | NM_145298    | apolipoprotein B mRNA editing enzyme, catalytic polypeptide-like 3F                       | 0 | 0 | 0 | 0 | 2 | 0 | 2 | 0 | hsa-miR-622 | -0.2  | N/A | Sites in UTR |
| CYTH3    | NM_004227    | cytohesin 3                                                                               | 0 | 0 | 0 | 0 | 1 | 1 | 0 | 0 | hsa-miR-622 | -0.2  | N/A | Sites in UTR |
| TOMM34   | NM_006809    | translocase of outer mitochondrial membrane 34                                            | 0 | 0 | 0 | 0 | 1 | 1 | 0 | 0 | hsa-miR-622 | -0.2  | N/A | Sites in UTR |
| WSCD1    | NM_015253    | WSC domain containing 1                                                                   | 0 | 0 | 0 | 0 | 1 | 1 | 0 | 0 | hsa-miR-622 | -0.2  | N/A | Sites in UTR |
| DPCR1    | NM_080870    | diffuse panbronchiolitis critical region 1                                                | 0 | 0 | 0 | 0 | 1 | 1 | 0 | 0 | hsa-miR-622 | -0.2  | N/A | Sites in UTR |
| PEA15    | NM_003768    | phosphoprotein enriched in astrocytes 15                                                  | 1 | 0 | 1 | 0 | 1 | 0 | 1 | 0 | hsa-miR-622 | -0.2  | N/A | Sites in UTR |
| PIK3R5   | NM_001142633 | phosphoinositide-3-kinase, regulatory subunit 5                                           | 0 | 0 | 0 | 0 | 2 | 1 | 1 | 0 | hsa-miR-622 | -0.2  | N/A | Sites in UTR |
| LCT      | NM_002299    | lactase                                                                                   | 0 | 0 | 0 | 0 | 1 | 0 | 1 | 0 | hsa-miR-622 | -0.2  | N/A | Sites in UTR |
| FAM36A   | NM_198076    | family with sequence similarity 36, member A                                              | 0 | 0 | 0 | 0 | 1 | 1 | 0 | 0 | hsa-miR-622 | -0.2  | N/A | Sites in UTR |
| ONECUT2  | NM_004852    | one cut homeobox 2                                                                        | 0 | 0 | 0 | 0 | 3 | 0 | 2 | 1 | hsa-miR-622 | -0.2  | N/A | Sites in UTR |
| TNPO3    | NM_001191028 | transportin 3                                                                             | 1 | 0 | 1 | 0 | 0 | 0 | 0 | 0 | hsa-miR-622 | -0.2  | N/A | Sites in UTR |
| SRFBP1   | NM_152546    | serum response factor binding protein 1                                                   | 0 | 0 | 0 | 0 | 1 | 0 | 1 | 0 | hsa-miR-622 | -0.2  | N/A | Sites in UTR |
| GPHN     | NM_001024218 | gephyrin                                                                                  | 1 | 0 | 0 | 1 | 1 | 0 | 0 | 1 | hsa-miR-622 | -0.2  | N/A | Sites in UTR |



|          |              |                                                                       |   |   |   |   |   |   |   |   |             |      |     |              |
|----------|--------------|-----------------------------------------------------------------------|---|---|---|---|---|---|---|---|-------------|------|-----|--------------|
| ADM2     | NM_024866    | adrenomedullin 2                                                      | 0 | 0 | 0 | 0 | 1 | 1 | 0 | 0 | hsa-miR-622 | -0.2 | N/A | Sites in UTR |
| EPHA5    | NM_004439    | EPH receptor A5                                                       | 0 | 0 | 0 | 0 | 2 | 1 | 0 | 1 | hsa-miR-622 | -0.2 | N/A | Sites in UTR |
| E2F6     | NM_198256    | E2F transcription factor 6                                            | 0 | 0 | 0 | 0 | 2 | 0 | 2 | 0 | hsa-miR-622 | -0.2 | N/A | Sites in UTR |
| PRF1     | NM_001083116 | perforin 1 (pore forming protein)                                     | 0 | 0 | 0 | 0 | 1 | 0 | 1 | 0 | hsa-miR-622 | -0.2 | N/A | Sites in UTR |
| SPTBN1   | NM_003128    | spectrin, beta, non-erythrocytic 1                                    | 0 | 0 | 0 | 0 | 1 | 0 | 1 | 0 | hsa-miR-622 | -0.2 | N/A | Sites in UTR |
| AKAP7    | NM_004842    | A kinase (PRKA) anchor protein 7                                      | 0 | 0 | 0 | 0 | 1 | 0 | 1 | 0 | hsa-miR-622 | -0.2 | N/A | Sites in UTR |
| CWC27    | NM_005869    | CWC27 spliceosome-associated protein homolog ( <i>S. cerevisiae</i> ) | 0 | 0 | 0 | 0 | 1 | 0 | 1 | 0 | hsa-miR-622 | -0.2 | N/A | Sites in UTR |
| KCNC1    | NM_004976    | potassium voltage-gated channel, Shaw-related subfamily, member 1     | 1 | 0 | 1 | 0 | 1 | 0 | 1 | 0 | hsa-miR-622 | -0.2 | N/A | Sites in UTR |
| MYH11    | NM_001040113 | myosin, heavy chain 11, smooth muscle                                 | 0 | 0 | 0 | 0 | 1 | 0 | 1 | 0 | hsa-miR-622 | -0.2 | N/A | Sites in UTR |
| KSR1     | NM_014238    | kinase suppressor of ras 1                                            | 0 | 0 | 0 | 0 | 1 | 0 | 1 | 0 | hsa-miR-622 | -0.2 | N/A | Sites in UTR |
| FAM13B   | NM_001101800 | family with sequence similarity 13, member B                          | 0 | 0 | 0 | 0 | 1 | 0 | 1 | 0 | hsa-miR-622 | -0.2 | N/A | Sites in UTR |
| CYSLTR2  | NM_020377    | cysteinyl leukotriene receptor 2                                      | 0 | 0 | 0 | 0 | 1 | 0 | 1 | 0 | hsa-miR-622 | -0.2 | N/A | Sites in UTR |
| CEP19    | NM_032898    | centrosomal protein 19kDa                                             | 0 | 0 | 0 | 0 | 1 | 0 | 1 | 0 | hsa-miR-622 | -0.2 | N/A | Sites in UTR |
| SLC22A8  | NM_001184732 | solute carrier family 22 (organic anion transporter), member 8        | 0 | 0 | 0 | 0 | 2 | 0 | 0 | 2 | hsa-miR-622 | -0.2 | N/A | Sites in UTR |
| ERP44    | NM_015051    | endoplasmic reticulum protein 44                                      | 0 | 0 | 0 | 0 | 1 | 1 | 0 | 0 | hsa-miR-622 | -0.2 | N/A | Sites in UTR |
| KIAA0317 | NM_001039479 | KIAA0317                                                              | 0 | 0 | 0 | 0 | 3 | 0 | 1 | 2 | hsa-miR-622 | -0.2 | N/A | Sites in UTR |
| FAM105A  | NM_019018    | family with sequence similarity 105, member A                         | 0 | 0 | 0 | 0 | 3 | 1 | 1 | 1 | hsa-miR-622 | -0.2 | N/A | Sites in UTR |
| HLA-DQB1 | NM_002123    | major histocompatibility complex, class II, DQ beta 1                 | 0 | 0 | 0 | 0 | 1 | 0 | 1 | 0 | hsa-miR-622 | -0.2 | N/A | Sites in UTR |

|          |              |                                                                        |   |   |   |   |   |   |   |   |             |      |     |              |
|----------|--------------|------------------------------------------------------------------------|---|---|---|---|---|---|---|---|-------------|------|-----|--------------|
| CHDH     | NM_018397    | choline dehydrogenase                                                  | 0 | 0 | 0 | 0 | 1 | 0 | 1 | 0 | hsa-miR-622 | -0.2 | N/A | Sites in UTR |
| LSM11    | NM_173491    | LSM11, U7 small nuclear RNA associated                                 | 1 | 0 | 1 | 0 | 0 | 0 | 0 | 0 | hsa-miR-622 | -0.2 | N/A | Sites in UTR |
| SLC15A5  | NM_001170798 | solute carrier family 15, member 5                                     | 0 | 0 | 0 | 0 | 1 | 0 | 1 | 0 | hsa-miR-622 | -0.2 | N/A | Sites in UTR |
| LPGAT1   | NM_014873    | lysophosphatidylglycerol acyltransferase 1                             | 0 | 0 | 0 | 0 | 2 | 0 | 2 | 0 | hsa-miR-622 | -0.2 | N/A | Sites in UTR |
| AQP5     | NM_001651    | aquaporin 5                                                            | 0 | 0 | 0 | 0 | 1 | 0 | 1 | 0 | hsa-miR-622 | -0.2 | N/A | Sites in UTR |
| BMP4     | NM_001202    | bone morphogenetic protein 4                                           | 0 | 0 | 0 | 0 | 1 | 0 | 1 | 0 | hsa-miR-622 | -0.2 | N/A | Sites in UTR |
| NIT1     | NM_001185093 | nitrilase 1                                                            | 0 | 0 | 0 | 0 | 1 | 0 | 1 | 0 | hsa-miR-622 | -0.2 | N/A | Sites in UTR |
| SLC7A6OS | NM_032178    | solute carrier family 7, member 6 opposite strand                      | 0 | 0 | 0 | 0 | 1 | 0 | 1 | 0 | hsa-miR-622 | -0.2 | N/A | Sites in UTR |
| KIAA0182 | NM_001134473 | KIAA0182                                                               | 0 | 0 | 0 | 0 | 1 | 1 | 0 | 0 | hsa-miR-622 | -0.2 | N/A | Sites in UTR |
| GLTPD1   | NM_001029885 | glycolipid transfer protein domain containing 1                        | 0 | 0 | 0 | 0 | 2 | 0 | 2 | 0 | hsa-miR-622 | -0.2 | N/A | Sites in UTR |
| VMA21    | NM_001017980 | VMA21 vacuolar H <sup>+</sup> -ATPase homolog ( <i>S. cerevisiae</i> ) | 0 | 0 | 0 | 0 | 1 | 0 | 1 | 0 | hsa-miR-622 | -0.2 | N/A | Sites in UTR |
| LY75     | NM_002349    | lymphocyte antigen 75                                                  | 0 | 0 | 0 | 0 | 2 | 0 | 0 | 2 | hsa-miR-622 | -0.2 | N/A | Sites in UTR |
| WASL     | NM_003941    | Wiskott-Aldrich syndrome-like                                          | 0 | 0 | 0 | 0 | 2 | 0 | 1 | 1 | hsa-miR-622 | -0.2 | N/A | Sites in UTR |
| B3GALNT2 | NM_152490    | beta-1,3-N-acetylgalactosaminyltransferase 2                           | 0 | 0 | 0 | 0 | 2 | 0 | 1 | 1 | hsa-miR-622 | -0.2 | N/A | Sites in UTR |
| DDX23    | NM_004818    | DEAD (Asp-Glu-Ala-Asp) box polypeptide 23                              | 1 | 1 | 0 | 0 | 0 | 0 | 0 | 0 | hsa-miR-622 | -0.2 | N/A | Sites in UTR |
| C15orf62 | NM_001130448 | chromosome 15 open reading frame 62                                    | 0 | 0 | 0 | 0 | 1 | 1 | 0 | 0 | hsa-miR-622 | -0.2 | N/A | Sites in UTR |
| IL16     | NM_001172128 | interleukin 16                                                         | 0 | 0 | 0 | 0 | 1 | 0 | 1 | 0 | hsa-miR-622 | -0.2 | N/A | Sites in UTR |
| TAGAP    | NM_054114    | T-cell activation RhoGTPase activating protein                         | 0 | 0 | 0 | 0 | 1 | 0 | 1 | 0 | hsa-miR-622 | -0.2 | N/A | Sites in UTR |

|           |              |                                                                                                  |   |   |   |   |   |   |   |   |             |       |     |              |
|-----------|--------------|--------------------------------------------------------------------------------------------------|---|---|---|---|---|---|---|---|-------------|-------|-----|--------------|
| RAD21     | NM_006265    | RAD21 homolog (S. pombe)                                                                         | 0 | 0 | 0 | 0 | 1 | 1 | 0 | 0 | hsa-miR-622 | -0.2  | N/A | Sites in UTR |
| RBMS1     | NM_002897    | RNA binding motif, single stranded interacting protein 1                                         | 0 | 0 | 0 | 0 | 1 | 1 | 0 | 0 | hsa-miR-622 | -0.2  | N/A | Sites in UTR |
| KLF9      | NM_001206    | Kruppel-like factor 9                                                                            | 0 | 0 | 0 | 0 | 1 | 0 | 0 | 1 | hsa-miR-622 | -0.2  | N/A | Sites in UTR |
| LSS       | NM_001145436 | lanosterol synthase (2,3-oxidosqualene-lanosterol cyclase)                                       | 0 | 0 | 0 | 0 | 1 | 0 | 1 | 0 | hsa-miR-622 | -0.2  | N/A | Sites in UTR |
| METTL13   | NM_001007239 | methyltransferase like 13                                                                        | 1 | 0 | 0 | 1 | 1 | 0 | 1 | 0 | hsa-miR-622 | -0.2  | N/A | Sites in UTR |
| FAM22G    | NM_001045477 | family with sequence similarity 22, member G                                                     | 0 | 0 | 0 | 0 | 1 | 1 | 0 | 0 | hsa-miR-622 | -0.2  | N/A | Sites in UTR |
| EXOC7     | NM_001013839 | exocyst complex component 7                                                                      | 0 | 0 | 0 | 0 | 4 | 0 | 3 | 1 | hsa-miR-622 | -0.19 | N/A | Sites in UTR |
| LAIR1     | NM_002287    | leukocyte-associated immunoglobulin-like receptor 1                                              | 0 | 0 | 0 | 0 | 1 | 0 | 1 | 0 | hsa-miR-622 | -0.19 | N/A | Sites in UTR |
| GALNT14   | NM_024572    | UDP-N-acetyl-alpha-D-galactosamine:polypeptide N-acetylgalactosaminyltransferase 14 (GalNAc-T14) | 0 | 0 | 0 | 0 | 1 | 0 | 1 | 0 | hsa-miR-622 | -0.19 | N/A | Sites in UTR |
| LOC284385 | NM_001242812 | hypothetical LOC284385                                                                           | 0 | 0 | 0 | 0 | 1 | 0 | 1 | 0 | hsa-miR-622 | -0.19 | N/A | Sites in UTR |
| CCDC165   | NM_015210    | coiled-coil domain containing 165                                                                | 0 | 0 | 0 | 0 | 1 | 0 | 1 | 0 | hsa-miR-622 | -0.19 | N/A | Sites in UTR |
| FBXO22    | NM_012170    | F-box protein 22                                                                                 | 0 | 0 | 0 | 0 | 1 | 0 | 1 | 0 | hsa-miR-622 | -0.19 | N/A | Sites in UTR |
| C8orf4    | NM_020130    | chromosome 8 open reading frame 4                                                                | 0 | 0 | 0 | 0 | 1 | 0 | 1 | 0 | hsa-miR-622 | -0.19 | N/A | Sites in UTR |
| METTL15   | NM_001113528 | methyltransferase like 15                                                                        | 0 | 0 | 0 | 0 | 1 | 0 | 1 | 0 | hsa-miR-622 | -0.19 | N/A | Sites in UTR |
| ETNK1     | NM_018638    | ethanolamine kinase 1                                                                            | 0 | 0 | 0 | 0 | 2 | 0 | 0 | 2 | hsa-miR-622 | -0.19 | N/A | Sites in UTR |
| SLC25A30  | NM_001010875 | solute carrier family 25, member 30                                                              | 0 | 0 | 0 | 0 | 2 | 0 | 1 | 1 | hsa-miR-622 | -0.19 | N/A | Sites in UTR |
| RGS4      | NM_001102445 | regulator of G-protein signaling 4                                                               | 0 | 0 | 0 | 0 | 1 | 0 | 1 | 0 | hsa-miR-622 | -0.19 | N/A | Sites in UTR |
| EP400     | NM_015409    | E1A binding protein p400                                                                         | 0 | 0 | 0 | 0 | 1 | 0 | 1 | 0 | hsa-miR-622 | -0.19 | N/A | Sites in UTR |

|         |              |                                                         |   |   |   |   |   |   |   |   |   |             |       |     |              |
|---------|--------------|---------------------------------------------------------|---|---|---|---|---|---|---|---|---|-------------|-------|-----|--------------|
| RBM12B  | NM_203390    | RNA binding motif protein 12B                           | 1 | 0 | 1 | 0 | 0 | 0 | 0 | 0 | 0 | hsa-miR-622 | -0.19 | N/A | Sites in UTR |
| CNTNAP2 | NM_014141    | contactin associated protein-like 2                     | 1 | 0 | 0 | 1 | 1 | 0 | 0 | 1 | 1 | hsa-miR-622 | -0.19 | N/A | Sites in UTR |
| SFRP1   | NM_003012    | secreted frizzled-related protein 1                     | 0 | 0 | 0 | 0 | 1 | 1 | 0 | 0 | 0 | hsa-miR-622 | -0.19 | N/A | Sites in UTR |
| MBNL1   | NM_021038    | muscleblind-like (Drosophila)                           | 1 | 1 | 0 | 0 | 1 | 0 | 0 | 1 | 1 | hsa-miR-622 | -0.19 | N/A | Sites in UTR |
| GABPB1  | NM_005254    | GA binding protein transcription factor, beta subunit 1 | 0 | 0 | 0 | 0 | 1 | 0 | 1 | 0 | 0 | hsa-miR-622 | -0.19 | N/A | Sites in UTR |
| UBE2L6  | NM_004223    | ubiquitin-conjugating enzyme E2L 6                      | 0 | 0 | 0 | 0 | 1 | 0 | 1 | 0 | 0 | hsa-miR-622 | -0.19 | N/A | Sites in UTR |
| C1orf9  | NM_014283    | chromosome 1 open reading frame 9                       | 0 | 0 | 0 | 0 | 1 | 0 | 1 | 0 | 0 | hsa-miR-622 | -0.19 | N/A | Sites in UTR |
| ZNF713  | NM_182633    | zinc finger protein 713                                 | 0 | 0 | 0 | 0 | 2 | 0 | 0 | 2 | 2 | hsa-miR-622 | -0.19 | N/A | Sites in UTR |
| RALGPS2 | NM_152663    | Ral GEF with PH domain and SH3 binding motif 2          | 0 | 0 | 0 | 0 | 1 | 1 | 0 | 0 | 0 | hsa-miR-622 | -0.19 | N/A | Sites in UTR |
| EPB41L5 | NM_001184937 | erythrocyte membrane protein band 4.1 like 5            | 0 | 0 | 0 | 0 | 1 | 1 | 0 | 0 | 0 | hsa-miR-622 | -0.19 | N/A | Sites in UTR |
| OTUD4   | NM_001102653 | OTU domain containing 4                                 | 0 | 0 | 0 | 0 | 2 | 1 | 1 | 0 | 0 | hsa-miR-622 | -0.19 | N/A | Sites in UTR |
| YPEL2   | NM_001005404 | yippee-like 2 (Drosophila)                              | 0 | 0 | 0 | 0 | 3 | 0 | 1 | 2 | 2 | hsa-miR-622 | -0.19 | N/A | Sites in UTR |
| ALDH1B1 | NM_000692    | aldehyde dehydrogenase 1 family, member B1              | 0 | 0 | 0 | 0 | 1 | 0 | 1 | 0 | 0 | hsa-miR-622 | -0.19 | N/A | Sites in UTR |
| DFFA    | NM_213566    | DNA fragmentation factor, 45kDa, alpha polypeptide      | 0 | 0 | 0 | 0 | 1 | 0 | 1 | 0 | 0 | hsa-miR-622 | -0.19 | N/A | Sites in UTR |
| USP24   | NM_015306    | ubiquitin specific peptidase 24                         | 1 | 0 | 1 | 0 | 0 | 0 | 0 | 0 | 0 | hsa-miR-622 | -0.19 | N/A | Sites in UTR |
| DLL4    | NM_019074    | delta-like 4 (Drosophila)                               | 1 | 0 | 1 | 0 | 0 | 0 | 0 | 0 | 0 | hsa-miR-622 | -0.19 | N/A | Sites in UTR |
| IQCH    | NM_001031715 | IQ motif containing H                                   | 0 | 0 | 0 | 0 | 1 | 0 | 1 | 0 | 0 | hsa-miR-622 | -0.19 | N/A | Sites in UTR |
| TMEM86A | NM_153347    | transmembrane protein 86A                               | 0 | 0 | 0 | 0 | 1 | 0 | 1 | 0 | 0 | hsa-miR-622 | -0.19 | N/A | Sites in UTR |

|           |              |                                                                                         |   |   |   |   |   |   |   |   |             |       |     |              |
|-----------|--------------|-----------------------------------------------------------------------------------------|---|---|---|---|---|---|---|---|-------------|-------|-----|--------------|
| KIAA0174  | NM_014761    | KIAA0174                                                                                | 0 | 0 | 0 | 0 | 2 | 0 | 0 | 2 | hsa-miR-622 | -0.19 | N/A | Sites in UTR |
| ZKSCAN1   | NM_003439    | zinc finger with KRAB and SCAN domains 1                                                | 0 | 0 | 0 | 0 | 3 | 1 | 0 | 2 | hsa-miR-622 | -0.19 | N/A | Sites in UTR |
| HIF1A     | NM_001530    | hypoxia inducible factor 1, alpha subunit (basic helix-loop-helix transcription factor) | 0 | 0 | 0 | 0 | 1 | 0 | 1 | 0 | hsa-miR-622 | -0.19 | N/A | Sites in UTR |
| SIN3A     | NM_001145357 | SIN3 homolog A, transcription regulator (yeast)                                         | 0 | 0 | 0 | 0 | 1 | 0 | 1 | 0 | hsa-miR-622 | -0.19 | N/A | Sites in UTR |
| FAM32A    | NM_014077    | family with sequence similarity 32, member A                                            | 0 | 0 | 0 | 0 | 1 | 0 | 1 | 0 | hsa-miR-622 | -0.19 | N/A | Sites in UTR |
| PCNP      | NM_020357    | PEST proteolytic signal containing nuclear protein                                      | 0 | 0 | 0 | 0 | 1 | 0 | 1 | 0 | hsa-miR-622 | -0.19 | N/A | Sites in UTR |
| ZNF329    | NM_024620    | zinc finger protein 329                                                                 | 0 | 0 | 0 | 0 | 2 | 0 | 0 | 2 | hsa-miR-622 | -0.19 | N/A | Sites in UTR |
| SNX10     | NM_001199835 | sorting nexin 10                                                                        | 0 | 0 | 0 | 0 | 2 | 0 | 1 | 1 | hsa-miR-622 | -0.19 | N/A | Sites in UTR |
| C20orf203 | NM_182584    | chromosome 20 open reading frame 203                                                    | 0 | 0 | 0 | 0 | 2 | 1 | 0 | 1 | hsa-miR-622 | -0.19 | N/A | Sites in UTR |
| C20orf112 | NM_080616    | chromosome 20 open reading frame 112                                                    | 1 | 0 | 0 | 1 | 1 | 0 | 1 | 0 | hsa-miR-622 | -0.19 | N/A | Sites in UTR |
| APC       | NM_000038    | adenomatous polyposis coli                                                              | 0 | 0 | 0 | 0 | 1 | 0 | 0 | 1 | hsa-miR-622 | -0.19 | N/A | Sites in UTR |
| CHRNA7    | NM_000746    | cholinergic receptor, nicotinic, alpha 7                                                | 0 | 0 | 0 | 0 | 1 | 0 | 1 | 0 | hsa-miR-622 | -0.19 | N/A | Sites in UTR |
| EYA4      | NM_004100    | eyes absent homolog 4 (Drosophila)                                                      | 1 | 0 | 1 | 0 | 0 | 0 | 0 | 0 | hsa-miR-622 | -0.19 | N/A | Sites in UTR |
| RLF       | NM_012421    | rearranged L-myc fusion                                                                 | 0 | 0 | 0 | 0 | 1 | 0 | 1 | 0 | hsa-miR-622 | -0.19 | N/A | Sites in UTR |
| TIGD3     | NM_145719    | tigger transposable element derived 3                                                   | 0 | 0 | 0 | 0 | 1 | 0 | 1 | 0 | hsa-miR-622 | -0.19 | N/A | Sites in UTR |
| C12orf74  | NM_001037671 | chromosome 12 open reading frame 74                                                     | 0 | 0 | 0 | 0 | 1 | 0 | 1 | 0 | hsa-miR-622 | -0.19 | N/A | Sites in UTR |
| SMAD2     | NM_001003652 | SMAD family member 2                                                                    | 0 | 0 | 0 | 0 | 1 | 1 | 0 | 0 | hsa-miR-622 | -0.19 | N/A | Sites in UTR |
| SMAD5     | NM_001001419 | SMAD family member 5                                                                    | 0 | 0 | 0 | 0 | 1 | 0 | 1 | 0 | hsa-miR-622 | -0.19 | N/A | Sites in UTR |

|          |              |                                                                                             |   |   |   |   |   |   |   |   |   |             |       |     |              |
|----------|--------------|---------------------------------------------------------------------------------------------|---|---|---|---|---|---|---|---|---|-------------|-------|-----|--------------|
| CLDN11   | NM_001185056 | claudin 11                                                                                  | 1 | 0 | 1 | 0 | 0 | 0 | 0 | 0 | 0 | hsa-miR-622 | -0.19 | N/A | Sites in UTR |
| FRY      | NM_023037    | furry homolog (Drosophila)                                                                  | 0 | 0 | 0 | 0 | 1 | 0 | 1 | 0 | 0 | hsa-miR-622 | -0.19 | N/A | Sites in UTR |
| TMEM43   | NM_024334    | transmembrane protein 43                                                                    | 1 | 0 | 1 | 0 | 0 | 0 | 0 | 0 | 0 | hsa-miR-622 | -0.19 | N/A | Sites in UTR |
| AGAP3    | NM_031946    | ArfGAP with GTPase domain, ankyrin repeat and PH domain 3                                   | 1 | 0 | 1 | 0 | 0 | 0 | 0 | 0 | 0 | hsa-miR-622 | -0.19 | N/A | Sites in UTR |
| ARHGDI A | NM_001185077 | Rho GDP dissociation inhibitor (GDI) alpha                                                  | 0 | 0 | 0 | 0 | 1 | 1 | 0 | 0 | 0 | hsa-miR-622 | -0.19 | N/A | Sites in UTR |
| ITGA3    | NM_002204    | integrin, alpha 3 (antigen CD49C, alpha 3 subunit of VLA-3 receptor)                        | 0 | 0 | 0 | 0 | 1 | 1 | 0 | 0 | 0 | hsa-miR-622 | -0.19 | N/A | Sites in UTR |
| USP20    | NM_001008563 | ubiquitin specific peptidase 20                                                             | 0 | 0 | 0 | 0 | 1 | 1 | 0 | 0 | 0 | hsa-miR-622 | -0.19 | N/A | Sites in UTR |
| ROBO2    | NM_001128929 | roundabout, axon guidance receptor, homolog 2 (Drosophila)                                  | 1 | 0 | 0 | 1 | 2 | 0 | 0 | 2 | 2 | hsa-miR-622 | -0.19 | N/A | Sites in UTR |
| CX3CR1   | NM_001171171 | chemokine (C-X3-C motif) receptor 1                                                         | 0 | 0 | 0 | 0 | 1 | 0 | 1 | 0 | 0 | hsa-miR-622 | -0.19 | N/A | Sites in UTR |
| FLT4     | NM_182925    | fms-related tyrosine kinase 4                                                               | 0 | 0 | 0 | 0 | 2 | 0 | 1 | 1 | 1 | hsa-miR-622 | -0.19 | N/A | Sites in UTR |
| MASP1    | NM_001031849 | mannan-binding lectin serine peptidase 1 (C4/C2 activating component of Ra-reactive factor) | 0 | 0 | 0 | 0 | 2 | 0 | 1 | 1 | 1 | hsa-miR-622 | -0.19 | N/A | Sites in UTR |
| E2F1     | NM_005225    | E2F transcription factor 1                                                                  | 1 | 1 | 0 | 0 | 0 | 0 | 0 | 0 | 0 | hsa-miR-622 | -0.19 | N/A | Sites in UTR |
| RBM8A    | NM_005105    | RNA binding motif protein 8A                                                                | 0 | 0 | 0 | 0 | 1 | 1 | 0 | 0 | 0 | hsa-miR-622 | -0.19 | N/A | Sites in UTR |
| SLC25A34 | NM_207348    | solute carrier family 25, member 34                                                         | 0 | 0 | 0 | 0 | 3 | 0 | 2 | 1 | 1 | hsa-miR-622 | -0.19 | N/A | Sites in UTR |
| RASA1    | NM_002890    | RAS p21 protein activator (GTPase activating protein) 1                                     | 0 | 0 | 0 | 0 | 1 | 0 | 1 | 0 | 0 | hsa-miR-622 | -0.18 | N/A | Sites in UTR |
| ZNF282   | NM_003575    | zinc finger protein 282                                                                     | 1 | 0 | 1 | 0 | 0 | 0 | 0 | 0 | 0 | hsa-miR-622 | -0.18 | N/A | Sites in UTR |
| C1orf212 | NM_001164824 | chromosome 1 open reading frame 212                                                         | 0 | 0 | 0 | 0 | 2 | 0 | 2 | 0 | 0 | hsa-miR-622 | -0.18 | N/A | Sites in UTR |
| PRKACA   | NM_002730    | protein kinase, cAMP-dependent, catalytic, alpha                                            | 1 | 1 | 0 | 0 | 0 | 0 | 0 | 0 | 0 | hsa-miR-622 | -0.18 | N/A | Sites in UTR |

|         |              |                                                                                    |   |   |   |   |   |   |   |   |             |       |     |              |
|---------|--------------|------------------------------------------------------------------------------------|---|---|---|---|---|---|---|---|-------------|-------|-----|--------------|
| NMUR1   | NM_006056    | neuromedin U receptor 1                                                            | 0 | 0 | 0 | 0 | 1 | 1 | 0 | 0 | hsa-miR-622 | -0.18 | N/A | Sites in UTR |
| LY6K    | NM_001160354 | lymphocyte antigen 6 complex, locus K                                              | 0 | 0 | 0 | 0 | 1 | 1 | 0 | 0 | hsa-miR-622 | -0.18 | N/A | Sites in UTR |
| NEK2    | NM_002497    | NIMA (never in mitosis gene a)-related kinase 2                                    | 0 | 0 | 0 | 0 | 1 | 0 | 0 | 1 | hsa-miR-622 | -0.18 | N/A | Sites in UTR |
| MX1     | NM_001144925 | myxovirus (influenza virus) resistance 1, interferon-inducible protein p78 (mouse) | 0 | 0 | 0 | 0 | 1 | 0 | 1 | 0 | hsa-miR-622 | -0.18 | N/A | Sites in UTR |
| GGT6    | NM_001122890 | gamma-glutamyltransferase 6                                                        | 0 | 0 | 0 | 0 | 1 | 0 | 1 | 0 | hsa-miR-622 | -0.18 | N/A | Sites in UTR |
| AGR3    | NM_176813    | anterior gradient homolog 3 (Xenopus laevis)                                       | 0 | 0 | 0 | 0 | 1 | 0 | 0 | 1 | hsa-miR-622 | -0.18 | N/A | Sites in UTR |
| AFF3    | NM_001025108 | AF4/FMR2 family, member 3                                                          | 0 | 0 | 0 | 0 | 1 | 0 | 1 | 0 | hsa-miR-622 | -0.18 | N/A | Sites in UTR |
| XPNPEP2 | NM_003399    | X-prolyl aminopeptidase (aminopeptidase P) 2, membrane-bound                       | 0 | 0 | 0 | 0 | 1 | 0 | 1 | 0 | hsa-miR-622 | -0.18 | N/A | Sites in UTR |
| TBC1D8  | NM_001102426 | TBC1 domain family, member 8 (with GRAM domain)                                    | 0 | 0 | 0 | 0 | 1 | 0 | 1 | 0 | hsa-miR-622 | -0.18 | N/A | Sites in UTR |
| DTX3    | NM_178502    | deltex homolog 3 (Drosophila)                                                      | 1 | 0 | 1 | 0 | 0 | 0 | 0 | 0 | hsa-miR-622 | -0.18 | N/A | Sites in UTR |
| ZNF627  | NM_145295    | zinc finger protein 627                                                            | 0 | 0 | 0 | 0 | 1 | 0 | 1 | 0 | hsa-miR-622 | -0.18 | N/A | Sites in UTR |
| SPRY4   | NM_207344    | SPRY domain containing 4                                                           | 0 | 0 | 0 | 0 | 1 | 0 | 1 | 0 | hsa-miR-622 | -0.18 | N/A | Sites in UTR |
| OR2H1   | NM_030883    | olfactory receptor, family 2, subfamily H, member 1                                | 0 | 0 | 0 | 0 | 1 | 0 | 0 | 1 | hsa-miR-622 | -0.18 | N/A | Sites in UTR |
| PLCH1   | NM_001130960 | phospholipase C, eta 1                                                             | 0 | 0 | 0 | 0 | 1 | 0 | 1 | 0 | hsa-miR-622 | -0.18 | N/A | Sites in UTR |
| ACPL2   | NM_001037172 | acid phosphatase-like 2                                                            | 0 | 0 | 0 | 0 | 1 | 0 | 1 | 0 | hsa-miR-622 | -0.18 | N/A | Sites in UTR |
| TNRC6B  | NM_001024843 | trinucleotide repeat containing 6B                                                 | 1 | 0 | 1 | 0 | 1 | 0 | 0 | 1 | hsa-miR-622 | -0.18 | N/A | Sites in UTR |
| GLO1    | NM_006708    | glyoxalase I                                                                       | 0 | 0 | 0 | 0 | 1 | 0 | 0 | 1 | hsa-miR-622 | -0.18 | N/A | Sites in UTR |
| GJB2    | NM_004004    | gap junction protein, beta 2, 26kDa                                                | 0 | 0 | 0 | 0 | 1 | 0 | 1 | 0 | hsa-miR-622 | -0.18 | N/A | Sites in UTR |

|          |              |                                                                                      |   |   |   |   |   |   |   |   |             |       |     |              |
|----------|--------------|--------------------------------------------------------------------------------------|---|---|---|---|---|---|---|---|-------------|-------|-----|--------------|
| ZNF143   | NM_003442    | zinc finger protein 143                                                              | 0 | 0 | 0 | 0 | 1 | 0 | 1 | 0 | hsa-miR-622 | -0.18 | N/A | Sites in UTR |
| PPM1D    | NM_003620    | protein phosphatase, Mg2+/Mn2+ dependent, 1D                                         | 0 | 0 | 0 | 0 | 1 | 0 | 1 | 0 | hsa-miR-622 | -0.18 | N/A | Sites in UTR |
| PAXIP1   | NM_007349    | PAX interacting (with transcription-activation domain) protein 1                     | 0 | 0 | 0 | 0 | 1 | 0 | 1 | 0 | hsa-miR-622 | -0.18 | N/A | Sites in UTR |
| SERAC1   | NM_032861    | serine active site containing 1                                                      | 0 | 0 | 0 | 0 | 1 | 0 | 1 | 0 | hsa-miR-622 | -0.18 | N/A | Sites in UTR |
| FKTN     | NM_001079802 | fukutin                                                                              | 0 | 0 | 0 | 0 | 1 | 1 | 0 | 0 | hsa-miR-622 | -0.18 | N/A | Sites in UTR |
| FHL3     | NM_004468    | four and a half LIM domains 3                                                        | 0 | 0 | 0 | 0 | 1 | 1 | 0 | 0 | hsa-miR-622 | -0.18 | N/A | Sites in UTR |
| C1orf201 | NM_001199012 | chromosome 1 open reading frame 201                                                  | 0 | 0 | 0 | 0 | 1 | 1 | 0 | 0 | hsa-miR-622 | -0.18 | N/A | Sites in UTR |
| YTHDF2   | NM_001172828 | YTH domain family, member 2                                                          | 0 | 0 | 0 | 0 | 1 | 0 | 1 | 0 | hsa-miR-622 | -0.18 | N/A | Sites in UTR |
| MEGF11   | NM_032445    | multiple EGF-like-domains 11                                                         | 0 | 0 | 0 | 0 | 1 | 0 | 1 | 0 | hsa-miR-622 | -0.18 | N/A | Sites in UTR |
| KIAA1644 | NM_001099294 | KIAA1644                                                                             | 1 | 1 | 0 | 0 | 0 | 0 | 0 | 0 | hsa-miR-622 | -0.18 | N/A | Sites in UTR |
| EIF2AK1  | NM_001134335 | eukaryotic translation initiation factor 2-alpha kinase 1                            | 0 | 0 | 0 | 0 | 2 | 1 | 0 | 1 | hsa-miR-622 | -0.18 | N/A | Sites in UTR |
| MGST2    | NM_001204366 | microsomal glutathione S-transferase 2                                               | 0 | 0 | 0 | 0 | 1 | 0 | 1 | 0 | hsa-miR-622 | -0.18 | N/A | Sites in UTR |
| PTK2     | NM_001199649 | PTK2 protein tyrosine kinase 2                                                       | 0 | 0 | 0 | 0 | 1 | 0 | 1 | 0 | hsa-miR-622 | -0.18 | N/A | Sites in UTR |
| TSPAN2   | NM_005725    | tetraspanin 2                                                                        | 0 | 0 | 0 | 0 | 1 | 0 | 1 | 0 | hsa-miR-622 | -0.18 | N/A | Sites in UTR |
| MAB21L2  | NM_006439    | mab-21-like 2 (C. elegans)                                                           | 0 | 0 | 0 | 0 | 1 | 0 | 1 | 0 | hsa-miR-622 | -0.18 | N/A | Sites in UTR |
| TAF7L    | NM_001168474 | TAF7-like RNA polymerase II, TATA box binding protein (TBP)-associated factor, 50kDa | 0 | 0 | 0 | 0 | 1 | 0 | 1 | 0 | hsa-miR-622 | -0.18 | N/A | Sites in UTR |
| FGFRL1   | NM_001004356 | fibroblast growth factor receptor-like 1                                             | 0 | 0 | 0 | 0 | 2 | 1 | 1 | 0 | hsa-miR-622 | -0.18 | N/A | Sites in UTR |
| SPATA2   | NM_001135773 | spermatogenesis associated 2                                                         | 0 | 0 | 0 | 0 | 2 | 0 | 2 | 0 | hsa-miR-622 | -0.18 | N/A | Sites in UTR |



|           |              |                                                                                |   |   |   |   |   |   |   |   |             |       |     |              |
|-----------|--------------|--------------------------------------------------------------------------------|---|---|---|---|---|---|---|---|-------------|-------|-----|--------------|
| ABL1      | NM_005157    | c-abl oncogene 1, non-receptor tyrosine kinase                                 | 0 | 0 | 0 | 0 | 2 | 1 | 1 | 0 | hsa-miR-622 | -0.18 | N/A | Sites in UTR |
| CEACAM7   | NM_006890    | carcinoembryonic antigen-related cell adhesion molecule 7                      | 0 | 0 | 0 | 0 | 1 | 0 | 1 | 0 | hsa-miR-622 | -0.18 | N/A | Sites in UTR |
| SETX      | NM_015046    | senataxin                                                                      | 0 | 0 | 0 | 0 | 1 | 0 | 1 | 0 | hsa-miR-622 | -0.18 | N/A | Sites in UTR |
| GOLGA4    | NM_001172713 | golgin A4                                                                      | 0 | 0 | 0 | 0 | 1 | 0 | 1 | 0 | hsa-miR-622 | -0.18 | N/A | Sites in UTR |
| KIF5C     | NM_004522    | kinesin family member 5C                                                       | 1 | 0 | 1 | 0 | 0 | 0 | 0 | 0 | hsa-miR-622 | -0.18 | N/A | Sites in UTR |
| RCN1      | NM_002901    | reticulocalbin 1, EF-hand calcium binding domain                               | 0 | 0 | 0 | 0 | 1 | 0 | 1 | 0 | hsa-miR-622 | -0.18 | N/A | Sites in UTR |
| HAO2      | NM_001005783 | hydroxyacid oxidase 2 (long chain)                                             | 0 | 0 | 0 | 0 | 1 | 0 | 1 | 0 | hsa-miR-622 | -0.18 | N/A | Sites in UTR |
| CXorf36   | NM_024689    | chromosome X open reading frame 36                                             | 0 | 0 | 0 | 0 | 1 | 0 | 1 | 0 | hsa-miR-622 | -0.18 | N/A | Sites in UTR |
| C15orf44  | NM_001136043 | chromosome 15 open reading frame 44                                            | 0 | 0 | 0 | 0 | 1 | 0 | 1 | 0 | hsa-miR-622 | -0.18 | N/A | Sites in UTR |
| KCNA6     | NM_002235    | potassium voltage-gated channel, shaker-related subfamily, member 6            | 1 | 0 | 1 | 0 | 1 | 0 | 0 | 1 | hsa-miR-622 | -0.18 | N/A | Sites in UTR |
| ATP2B1    | NM_001001323 | ATPase, Ca++ transporting, plasma membrane 1                                   | 1 | 1 | 0 | 0 | 0 | 0 | 0 | 0 | hsa-miR-622 | -0.18 | N/A | Sites in UTR |
| TIMP2     | NM_003255    | TIMP metalloproteinase inhibitor 2                                             | 1 | 0 | 1 | 0 | 2 | 0 | 1 | 1 | hsa-miR-622 | -0.18 | N/A | Sites in UTR |
| POP1      | NM_001145860 | processing of precursor 1, ribonuclease P/MRP subunit (S. cerevisiae)          | 0 | 0 | 0 | 0 | 1 | 0 | 0 | 1 | hsa-miR-622 | -0.18 | N/A | Sites in UTR |
| SLC7A1    | NM_003045    | solute carrier family 7 (cationic amino acid transporter, y+ system), member 1 | 0 | 0 | 0 | 0 | 1 | 0 | 1 | 0 | hsa-miR-622 | -0.18 | N/A | Sites in UTR |
| EXO1      | NM_003686    | exonuclease 1                                                                  | 0 | 0 | 0 | 0 | 1 | 0 | 1 | 0 | hsa-miR-622 | -0.18 | N/A | Sites in UTR |
| PDSS1     | NM_014317    | prenyl (decaprenyl) diphosphate synthase, subunit 1                            | 1 | 0 | 1 | 0 | 0 | 0 | 0 | 0 | hsa-miR-622 | -0.18 | N/A | Sites in UTR |
| C20orf177 | NM_001190826 | chromosome 20 open reading frame 177                                           | 0 | 0 | 0 | 0 | 1 | 0 | 1 | 0 | hsa-miR-622 | -0.18 | N/A | Sites in UTR |
| VMP1      | NM_030938    | vacuole membrane protein 1                                                     | 0 | 0 | 0 | 0 | 1 | 0 | 1 | 0 | hsa-miR-622 | -0.18 | N/A | Sites in UTR |

|              |              |                                                               |   |   |   |   |   |   |   |   |             |       |     |              |
|--------------|--------------|---------------------------------------------------------------|---|---|---|---|---|---|---|---|-------------|-------|-----|--------------|
| UBR7         | NM_175748    | ubiquitin protein ligase E3 component n-recognin 7 (putative) | 0 | 0 | 0 | 0 | 2 | 0 | 1 | 1 | hsa-miR-622 | -0.18 | N/A | Sites in UTR |
| FCHSD2       | NM_014824    | FCH and double SH3 domains 2                                  | 0 | 0 | 0 | 0 | 1 | 1 | 0 | 0 | hsa-miR-622 | -0.18 | N/A | Sites in UTR |
| ARPM1        | NM_032487    | actin related protein M1                                      | 0 | 0 | 0 | 0 | 1 | 0 | 0 | 1 | hsa-miR-622 | -0.17 | N/A | Sites in UTR |
| RAB1A        | NM_004161    | RAB1A, member RAS oncogene family                             | 1 | 0 | 1 | 0 | 0 | 0 | 0 | 0 | hsa-miR-622 | -0.17 | N/A | Sites in UTR |
| PLCB1        | NM_015192    | phospholipase C, beta 1 (phosphoinositide-specific)           | 0 | 0 | 0 | 0 | 1 | 0 | 1 | 0 | hsa-miR-622 | -0.17 | N/A | Sites in UTR |
| PTCHD2       | NM_020780    | patched domain containing 2                                   | 0 | 0 | 0 | 0 | 1 | 0 | 1 | 0 | hsa-miR-622 | -0.17 | N/A | Sites in UTR |
| PRKCQ        | NM_001242413 | protein kinase C, theta                                       | 0 | 0 | 0 | 0 | 2 | 0 | 0 | 2 | hsa-miR-622 | -0.17 | N/A | Sites in UTR |
| MPPED2       | NM_001145399 | metallophosphoesterase domain containing 2                    | 0 | 0 | 0 | 0 | 2 | 0 | 1 | 1 | hsa-miR-622 | -0.17 | N/A | Sites in UTR |
| LOC100507203 | NM_001195597 | hypothetical LOC100507203                                     | 0 | 0 | 0 | 0 | 1 | 1 | 0 | 0 | hsa-miR-622 | -0.17 | N/A | Sites in UTR |
| ZNF648       | NM_001009992 | zinc finger protein 648                                       | 0 | 0 | 0 | 0 | 1 | 0 | 0 | 1 | hsa-miR-622 | -0.17 | N/A | Sites in UTR |
| GYPA         | NM_002099    | glycophorin A (MNS blood group)                               | 0 | 0 | 0 | 0 | 1 | 0 | 1 | 0 | hsa-miR-622 | -0.17 | N/A | Sites in UTR |
| SLC22A18     | NM_002555    | solute carrier family 22, member 18                           | 0 | 0 | 0 | 0 | 1 | 0 | 1 | 0 | hsa-miR-622 | -0.17 | N/A | Sites in UTR |
| GPR68        | NM_001177676 | G protein-coupled receptor 68                                 | 0 | 0 | 0 | 0 | 1 | 0 | 1 | 0 | hsa-miR-622 | -0.17 | N/A | Sites in UTR |
| RASAL1       | NM_001193520 | RAS protein activator like 1 (GAP1 like)                      | 0 | 0 | 0 | 0 | 1 | 0 | 1 | 0 | hsa-miR-622 | -0.17 | N/A | Sites in UTR |
| IGF2BP2      | NM_001007225 | insulin-like growth factor 2 mRNA binding protein 2           | 0 | 0 | 0 | 0 | 1 | 0 | 1 | 0 | hsa-miR-622 | -0.17 | N/A | Sites in UTR |
| ANKFY1       | NM_016376    | ankyrin repeat and FYVE domain containing 1                   | 1 | 0 | 1 | 0 | 0 | 0 | 0 | 0 | hsa-miR-622 | -0.17 | N/A | Sites in UTR |
| CSGALNACT1   | NM_001130518 | chondroitin sulfate N-acetylgalactosaminyltransferase 1       | 0 | 0 | 0 | 0 | 1 | 0 | 1 | 0 | hsa-miR-622 | -0.17 | N/A | Sites in UTR |
| NCAM2        | NM_004540    | neural cell adhesion molecule 2                               | 0 | 0 | 0 | 0 | 2 | 0 | 0 | 2 | hsa-miR-622 | -0.17 | N/A | Sites in UTR |

|          |              |                                                                               |   |   |   |   |   |   |   |   |             |       |     |              |
|----------|--------------|-------------------------------------------------------------------------------|---|---|---|---|---|---|---|---|-------------|-------|-----|--------------|
| GPSM3    | NM_022107    | G-protein signaling modulator 3                                               | 0 | 0 | 0 | 0 | 2 | 0 | 0 | 2 | hsa-miR-622 | -0.17 | N/A | Sites in UTR |
| FGF9     | NM_002010    | fibroblast growth factor 9 (glia-activating factor)                           | 1 | 0 | 1 | 0 | 1 | 0 | 0 | 1 | hsa-miR-622 | -0.17 | N/A | Sites in UTR |
| RAB15    | NM_198686    | RAB15, member RAS oncogene family                                             | 0 | 0 | 0 | 0 | 2 | 0 | 1 | 1 | hsa-miR-622 | -0.17 | N/A | Sites in UTR |
| GPR64    | NM_001079858 | G protein-coupled receptor 64                                                 | 0 | 0 | 0 | 0 | 1 | 1 | 0 | 0 | hsa-miR-622 | -0.17 | N/A | Sites in UTR |
| TRAF1    | NM_001190945 | TNF receptor-associated factor 1                                              | 0 | 0 | 0 | 0 | 4 | 1 | 1 | 2 | hsa-miR-622 | -0.17 | N/A | Sites in UTR |
| IL1B     | NM_000576    | interleukin 1, beta                                                           | 0 | 0 | 0 | 0 | 1 | 0 | 0 | 1 | hsa-miR-622 | -0.17 | N/A | Sites in UTR |
| STARD8   | NM_001142503 | StAR-related lipid transfer (START) domain containing 8                       | 0 | 0 | 0 | 0 | 1 | 1 | 0 | 0 | hsa-miR-622 | -0.17 | N/A | Sites in UTR |
| SYT11    | NM_152280    | synaptotagmin XI                                                              | 1 | 0 | 0 | 1 | 1 | 0 | 0 | 1 | hsa-miR-622 | -0.17 | N/A | Sites in UTR |
| ACOX1    | NM_001185039 | acyl-CoA oxidase 1, palmitoyl                                                 | 0 | 0 | 0 | 0 | 2 | 0 | 2 | 0 | hsa-miR-622 | -0.17 | N/A | Sites in UTR |
| PLEKHG4  | NM_001129727 | pleckstrin homology domain containing, family G (with RhoGef domain) member 4 | 0 | 0 | 0 | 0 | 1 | 0 | 0 | 1 | hsa-miR-622 | -0.17 | N/A | Sites in UTR |
| HPS3     | NM_032383    | Hermansky-Pudlak syndrome 3                                                   | 0 | 0 | 0 | 0 | 1 | 0 | 0 | 1 | hsa-miR-622 | -0.17 | N/A | Sites in UTR |
| EPB41L4A | NM_022140    | erythrocyte membrane protein band 4.1 like 4A                                 | 0 | 0 | 0 | 0 | 1 | 0 | 1 | 0 | hsa-miR-622 | -0.17 | N/A | Sites in UTR |
| PNPLA3   | NM_025225    | patatin-like phospholipase domain containing 3                                | 0 | 0 | 0 | 0 | 1 | 0 | 1 | 0 | hsa-miR-622 | -0.17 | N/A | Sites in UTR |
| TM4SF18  | NM_001184723 | transmembrane 4 L six family member 18                                        | 0 | 0 | 0 | 0 | 1 | 0 | 1 | 0 | hsa-miR-622 | -0.17 | N/A | Sites in UTR |
| C2orf72  | NM_001144994 | chromosome 2 open reading frame 72                                            | 0 | 0 | 0 | 0 | 1 | 0 | 1 | 0 | hsa-miR-622 | -0.17 | N/A | Sites in UTR |
| ABI2     | NM_005759    | abl-interactor 2                                                              | 0 | 0 | 0 | 0 | 2 | 0 | 0 | 2 | hsa-miR-622 | -0.17 | N/A | Sites in UTR |
| TOR1AIP2 | NM_001199260 | torsin A interacting protein 2                                                | 0 | 0 | 0 | 0 | 1 | 1 | 0 | 0 | hsa-miR-622 | -0.17 | N/A | Sites in UTR |
| C9orf47  | NM_001001938 | chromosome 9 open reading frame 47                                            | 0 | 0 | 0 | 0 | 3 | 0 | 1 | 2 | hsa-miR-622 | -0.17 | N/A | Sites in UTR |

|          |              |                                                              |   |   |   |   |   |   |   |   |             |       |     |              |
|----------|--------------|--------------------------------------------------------------|---|---|---|---|---|---|---|---|-------------|-------|-----|--------------|
| IGSF3    | NM_001007237 | immunoglobulin superfamily, member 3                         | 0 | 0 | 0 | 0 | 3 | 0 | 3 | 0 | hsa-miR-622 | -0.17 | N/A | Sites in UTR |
| GGT7     | NM_178026    | gamma-glutamyltransferase 7                                  | 0 | 0 | 0 | 0 | 1 | 0 | 1 | 0 | hsa-miR-622 | -0.17 | N/A | Sites in UTR |
| TLK2     | NM_001112707 | tousled-like kinase 2                                        | 1 | 0 | 1 | 0 | 0 | 0 | 0 | 0 | hsa-miR-622 | -0.17 | N/A | Sites in UTR |
| HABP2    | NM_001177660 | hyaluronan binding protein 2                                 | 0 | 0 | 0 | 0 | 1 | 0 | 1 | 0 | hsa-miR-622 | -0.17 | N/A | Sites in UTR |
| BUB3     | NM_004725    | budding uninhibited by benzimidazoles 3 homolog (yeast)      | 0 | 0 | 0 | 0 | 1 | 0 | 1 | 0 | hsa-miR-622 | -0.17 | N/A | Sites in UTR |
| FAIM3    | NM_001142473 | Fas apoptotic inhibitory molecule 3                          | 0 | 0 | 0 | 0 | 1 | 0 | 1 | 0 | hsa-miR-622 | -0.17 | N/A | Sites in UTR |
| SLC23A2  | NM_005116    | solute carrier family 23 (nucleobase transporters), member 2 | 0 | 0 | 0 | 0 | 1 | 0 | 1 | 0 | hsa-miR-622 | -0.17 | N/A | Sites in UTR |
| PSIP1    | NM_001128217 | PC4 and SFRS1 interacting protein 1                          | 0 | 0 | 0 | 0 | 1 | 0 | 1 | 0 | hsa-miR-622 | -0.17 | N/A | Sites in UTR |
| TRAPPC3  | NM_014408    | trafficking protein particle complex 3                       | 1 | 0 | 1 | 0 | 0 | 0 | 0 | 0 | hsa-miR-622 | -0.17 | N/A | Sites in UTR |
| LGR4     | NM_018490    | leucine-rich repeat containing G protein-coupled receptor 4  | 0 | 0 | 0 | 0 | 1 | 0 | 1 | 0 | hsa-miR-622 | -0.17 | N/A | Sites in UTR |
| RAB20    | NM_017817    | RAB20, member RAS oncogene family                            | 0 | 0 | 0 | 0 | 1 | 0 | 1 | 0 | hsa-miR-622 | -0.17 | N/A | Sites in UTR |
| SPSB2    | NM_001146316 | splA/ryanodine receptor domain and SOCS box containing 2     | 0 | 0 | 0 | 0 | 1 | 0 | 1 | 0 | hsa-miR-622 | -0.17 | N/A | Sites in UTR |
| C9orf100 | NM_032818    | chromosome 9 open reading frame 100                          | 0 | 0 | 0 | 0 | 1 | 0 | 1 | 0 | hsa-miR-622 | -0.17 | N/A | Sites in UTR |
| KLF14    | NM_138693    | Kruppel-like factor 14                                       | 1 | 0 | 1 | 0 | 0 | 0 | 0 | 0 | hsa-miR-622 | -0.17 | N/A | Sites in UTR |
| SH3PXD2B | NM_001017995 | SH3 and PX domains 2B                                        | 0 | 0 | 0 | 0 | 2 | 0 | 2 | 0 | hsa-miR-622 | -0.17 | N/A | Sites in UTR |
| FAM164A  | NM_016010    | family with sequence similarity 164, member A                | 0 | 0 | 0 | 0 | 1 | 0 | 1 | 0 | hsa-miR-622 | -0.17 | N/A | Sites in UTR |
| TM6SF1   | NM_001144903 | transmembrane 6 superfamily member 1                         | 0 | 0 | 0 | 0 | 1 | 0 | 1 | 0 | hsa-miR-622 | -0.17 | N/A | Sites in UTR |
| SEPN1    | NM_020451    | selenoprotein N, 1                                           | 0 | 0 | 0 | 0 | 1 | 0 | 1 | 0 | hsa-miR-622 | -0.17 | N/A | Sites in UTR |

|          |              |                                                                                              |   |   |   |   |   |   |   |   |             |       |     |              |
|----------|--------------|----------------------------------------------------------------------------------------------|---|---|---|---|---|---|---|---|-------------|-------|-----|--------------|
| PLEKHA3  | NM_019091    | pleckstrin homology domain containing, family A (phosphoinositide binding specific) member 3 | 0 | 0 | 0 | 0 | 1 | 0 | 1 | 0 | hsa-miR-622 | -0.17 | N/A | Sites in UTR |
| SLFN11   | NM_001104587 | schlafen family member 11                                                                    | 0 | 0 | 0 | 0 | 2 | 0 | 2 | 0 | hsa-miR-622 | -0.17 | N/A | Sites in UTR |
| C6       | NM_000065    | complement component 6                                                                       | 0 | 0 | 0 | 0 | 1 | 0 | 1 | 0 | hsa-miR-622 | -0.17 | N/A | Sites in UTR |
| COL2A1   | NM_001844    | collagen, type II, alpha 1                                                                   | 1 | 0 | 1 | 0 | 0 | 0 | 0 | 0 | hsa-miR-622 | -0.17 | N/A | Sites in UTR |
| TRIM31   | NM_007028    | tripartite motif containing 31                                                               | 0 | 0 | 0 | 0 | 1 | 0 | 1 | 0 | hsa-miR-622 | -0.17 | N/A | Sites in UTR |
| ESRRB    | NM_004452    | estrogen-related receptor beta                                                               | 0 | 0 | 0 | 0 | 2 | 0 | 1 | 1 | hsa-miR-622 | -0.17 | N/A | Sites in UTR |
| SAMD8    | NM_001174156 | sterile alpha motif domain containing 8                                                      | 0 | 0 | 0 | 0 | 4 | 1 | 1 | 2 | hsa-miR-622 | -0.17 | N/A | Sites in UTR |
| HORMAD1  | NM_001199829 | HORMA domain containing 1                                                                    | 0 | 0 | 0 | 0 | 1 | 0 | 0 | 1 | hsa-miR-622 | -0.17 | N/A | Sites in UTR |
| FKBP2    | NM_001135208 | FK506 binding protein 2, 13kDa                                                               | 1 | 0 | 1 | 0 | 1 | 0 | 1 | 0 | hsa-miR-622 | -0.17 | N/A | Sites in UTR |
| ICOS     | NM_012092    | inducible T-cell co-stimulator                                                               | 0 | 0 | 0 | 0 | 1 | 0 | 1 | 0 | hsa-miR-622 | -0.17 | N/A | Sites in UTR |
| MPEG1    | NM_001039396 | macrophage expressed 1                                                                       | 0 | 0 | 0 | 0 | 1 | 0 | 1 | 0 | hsa-miR-622 | -0.17 | N/A | Sites in UTR |
| C12orf61 | NM_175895    | chromosome 12 open reading frame 61                                                          | 0 | 0 | 0 | 0 | 1 | 0 | 1 | 0 | hsa-miR-622 | -0.17 | N/A | Sites in UTR |
| ROD1     | NM_001163788 | ROD1 regulator of differentiation 1 (S. pombe)                                               | 0 | 0 | 0 | 0 | 2 | 0 | 0 | 2 | hsa-miR-622 | -0.17 | N/A | Sites in UTR |
| TMEM120B | NM_001080825 | transmembrane protein 120B                                                                   | 0 | 0 | 0 | 0 | 2 | 0 | 2 | 0 | hsa-miR-622 | -0.17 | N/A | Sites in UTR |
| GADD45B  | NM_015675    | growth arrest and DNA-damage-inducible, beta                                                 | 0 | 0 | 0 | 0 | 3 | 0 | 1 | 2 | hsa-miR-622 | -0.17 | N/A | Sites in UTR |
| VWDE     | NM_001135924 | von Willebrand factor D and EGF domains                                                      | 0 | 0 | 0 | 0 | 1 | 0 | 0 | 1 | hsa-miR-622 | -0.17 | N/A | Sites in UTR |
| ERBB3    | NM_001982    | v-erb-b2 erythroblastic leukemia viral oncogene homolog 3 (avian)                            | 0 | 0 | 0 | 0 | 1 | 0 | 1 | 0 | hsa-miR-622 | -0.17 | N/A | Sites in UTR |
| PHF20L1  | NM_016018    | PHD finger protein 20-like 1                                                                 | 0 | 0 | 0 | 0 | 1 | 0 | 1 | 0 | hsa-miR-622 | -0.17 | N/A | Sites in UTR |

|         |              |                                                                                  |   |   |   |   |   |   |   |   |             |       |     |              |
|---------|--------------|----------------------------------------------------------------------------------|---|---|---|---|---|---|---|---|-------------|-------|-----|--------------|
| HAUS3   | NM_024511    | HAUS augmin-like complex, subunit 3                                              | 0 | 0 | 0 | 0 | 1 | 1 | 0 | 0 | hsa-miR-622 | -0.17 | N/A | Sites in UTR |
| CNOT7   | NM_054026    | CCR4-NOT transcription complex, subunit 7                                        | 0 | 0 | 0 | 0 | 1 | 0 | 0 | 1 | hsa-miR-622 | -0.17 | N/A | Sites in UTR |
| TAF9B   | NM_015975    | TAF9B RNA polymerase II, TATA box binding protein (TBP)-associated factor, 31kDa | 0 | 0 | 0 | 0 | 1 | 0 | 0 | 1 | hsa-miR-622 | -0.17 | N/A | Sites in UTR |
| MAPK9   | NM_001135044 | mitogen-activated protein kinase 9                                               | 0 | 0 | 0 | 0 | 1 | 0 | 1 | 0 | hsa-miR-622 | -0.17 | N/A | Sites in UTR |
| INADL   | NM_176877    | InaD-like (Drosophila)                                                           | 0 | 0 | 0 | 0 | 1 | 0 | 1 | 0 | hsa-miR-622 | -0.17 | N/A | Sites in UTR |
| TMCC3   | NM_020698    | transmembrane and coiled-coil domain family 3                                    | 0 | 0 | 0 | 0 | 1 | 0 | 1 | 0 | hsa-miR-622 | -0.17 | N/A | Sites in UTR |
| FAM60A  | NM_001135811 | family with sequence similarity 60, member A                                     | 0 | 0 | 0 | 0 | 1 | 1 | 0 | 0 | hsa-miR-622 | -0.17 | N/A | Sites in UTR |
| HHIPL1  | NM_001127258 | HHIP-like 1                                                                      | 0 | 0 | 0 | 0 | 1 | 1 | 0 | 0 | hsa-miR-622 | -0.17 | N/A | Sites in UTR |
| INO80D  | NM_017759    | INO80 complex subunit D                                                          | 0 | 0 | 0 | 0 | 3 | 0 | 2 | 1 | hsa-miR-622 | -0.16 | N/A | Sites in UTR |
| TMEM180 | NM_024789    | transmembrane protein 180                                                        | 0 | 0 | 0 | 0 | 1 | 0 | 0 | 1 | hsa-miR-622 | -0.16 | N/A | Sites in UTR |
| ALPL    | NM_000478    | alkaline phosphatase, liver/bone/kidney                                          | 1 | 0 | 1 | 0 | 0 | 0 | 0 | 0 | hsa-miR-622 | -0.16 | N/A | Sites in UTR |
| PAX4    | NM_006193    | paired box 4                                                                     | 0 | 0 | 0 | 0 | 1 | 0 | 1 | 0 | hsa-miR-622 | -0.16 | N/A | Sites in UTR |
| TBX19   | NM_005149    | T-box 19                                                                         | 0 | 0 | 0 | 0 | 1 | 0 | 1 | 0 | hsa-miR-622 | -0.16 | N/A | Sites in UTR |
| MORC4   | NM_001085354 | MORC family CW-type zinc finger 4                                                | 0 | 0 | 0 | 0 | 1 | 0 | 1 | 0 | hsa-miR-622 | -0.16 | N/A | Sites in UTR |
| GRASP   | NM_181711    | GRP1 (general receptor for phosphoinositides 1)-associated scaffold protein      | 1 | 0 | 1 | 0 | 0 | 0 | 0 | 0 | hsa-miR-622 | -0.16 | N/A | Sites in UTR |
| ANKRD11 | NM_013275    | ankyrin repeat domain 11                                                         | 0 | 0 | 0 | 0 | 2 | 0 | 2 | 0 | hsa-miR-622 | -0.16 | N/A | Sites in UTR |
| TOR1B   | NM_014506    | torsin family 1, member B (torsin B)                                             | 0 | 0 | 0 | 0 | 1 | 1 | 0 | 0 | hsa-miR-622 | -0.16 | N/A | Sites in UTR |
| UBQLN1  | NM_013438    | ubiquilin 1                                                                      | 0 | 0 | 0 | 0 | 1 | 1 | 0 | 0 | hsa-miR-622 | -0.16 | N/A | Sites in UTR |

|          |              |                                                                            |   |   |   |   |   |   |   |   |             |       |     |              |
|----------|--------------|----------------------------------------------------------------------------|---|---|---|---|---|---|---|---|-------------|-------|-----|--------------|
| RNF2     | NM_007212    | ring finger protein 2                                                      | 0 | 0 | 0 | 0 | 1 | 0 | 0 | 1 | hsa-miR-622 | -0.16 | N/A | Sites in UTR |
| SNRPB2   | NM_003092    | small nuclear ribonucleoprotein polypeptide B                              | 0 | 0 | 0 | 0 | 1 | 0 | 0 | 1 | hsa-miR-622 | -0.16 | N/A | Sites in UTR |
| TEX10    | NM_001161584 | testis expressed 10                                                        | 0 | 0 | 0 | 0 | 1 | 0 | 0 | 1 | hsa-miR-622 | -0.16 | N/A | Sites in UTR |
| B3GALNT1 | NM_001038628 | beta-1,3-N-acetylgalactosaminyltransferase 1 (globoside blood group)       | 0 | 0 | 0 | 0 | 1 | 0 | 1 | 0 | hsa-miR-622 | -0.16 | N/A | Sites in UTR |
| FTSJ2    | NM_013393    | FtsJ homolog 2 (E. coli)                                                   | 0 | 0 | 0 | 0 | 1 | 0 | 1 | 0 | hsa-miR-622 | -0.16 | N/A | Sites in UTR |
| CEACAM21 | NM_001098506 | carcinoembryonic antigen-related cell adhesion molecule 21                 | 0 | 0 | 0 | 0 | 1 | 0 | 1 | 0 | hsa-miR-622 | -0.16 | N/A | Sites in UTR |
| CRTC3    | NM_001042574 | CREB regulated transcription coactivator 3                                 | 0 | 0 | 0 | 0 | 1 | 1 | 0 | 0 | hsa-miR-622 | -0.16 | N/A | Sites in UTR |
| TARBP2   | NM_004178    | TAR (HIV-1) RNA binding protein 2                                          | 1 | 0 | 1 | 0 | 0 | 0 | 0 | 0 | hsa-miR-622 | -0.16 | N/A | Sites in UTR |
| KCTD3    | NM_016121    | potassium channel tetramerisation domain containing 3                      | 0 | 0 | 0 | 0 | 1 | 0 | 1 | 0 | hsa-miR-622 | -0.16 | N/A | Sites in UTR |
| MRPS14   | NM_022100    | mitochondrial ribosomal protein S14                                        | 0 | 0 | 0 | 0 | 2 | 0 | 0 | 2 | hsa-miR-622 | -0.16 | N/A | Sites in UTR |
| GPR4     | NM_005282    | G protein-coupled receptor 4                                               | 0 | 0 | 0 | 0 | 2 | 0 | 1 | 1 | hsa-miR-622 | -0.16 | N/A | Sites in UTR |
| FHDC1    | NM_033393    | FH2 domain containing 1                                                    | 0 | 0 | 0 | 0 | 3 | 0 | 2 | 1 | hsa-miR-622 | -0.16 | N/A | Sites in UTR |
| DAZL     | NM_001190811 | deleted in azoospermia-like                                                | 0 | 0 | 0 | 0 | 1 | 0 | 0 | 1 | hsa-miR-622 | -0.16 | N/A | Sites in UTR |
| C11orf73 | NM_016401    | chromosome 11 open reading frame 73                                        | 0 | 0 | 0 | 0 | 1 | 0 | 0 | 1 | hsa-miR-622 | -0.16 | N/A | Sites in UTR |
| CYB5RL   | NM_001031672 | cytochrome b5 reductase-like                                               | 0 | 0 | 0 | 0 | 1 | 0 | 1 | 0 | hsa-miR-622 | -0.16 | N/A | Sites in UTR |
| EYA3     | NM_001990    | eyes absent homolog 3 (Drosophila)                                         | 0 | 0 | 0 | 0 | 2 | 0 | 1 | 1 | hsa-miR-622 | -0.16 | N/A | Sites in UTR |
| FAM19A5  | NM_001082967 | family with sequence similarity 19 (chemokine (C-C motif)-like), member A5 | 1 | 0 | 1 | 0 | 1 | 0 | 0 | 1 | hsa-miR-622 | -0.16 | N/A | Sites in UTR |
| PODXL    | NM_001018111 | podocalyxin-like                                                           | 0 | 0 | 0 | 0 | 3 | 0 | 3 | 0 | hsa-miR-622 | -0.16 | N/A | Sites in UTR |

|         |              |                                                            |   |   |   |   |   |   |   |   |             |       |     |              |
|---------|--------------|------------------------------------------------------------|---|---|---|---|---|---|---|---|-------------|-------|-----|--------------|
| NF2     | NM_000268    | neurofibromin 2 (merlin)                                   | 0 | 0 | 0 | 0 | 4 | 0 | 3 | 1 | hsa-miR-622 | -0.16 | N/A | Sites in UTR |
| SERBP1  | NM_001018067 | SERPINE1 mRNA binding protein 1                            | 1 | 0 | 0 | 1 | 0 | 0 | 0 | 0 | hsa-miR-622 | -0.16 | N/A | Sites in UTR |
| OR12D3  | NM_030959    | olfactory receptor, family 12, subfamily D, member 3       | 0 | 0 | 0 | 0 | 1 | 0 | 0 | 1 | hsa-miR-622 | -0.16 | N/A | Sites in UTR |
| PAGE5   | NM_001013435 | P antigen family, member 5 (prostate associated)           | 0 | 0 | 0 | 0 | 1 | 0 | 0 | 1 | hsa-miR-622 | -0.16 | N/A | Sites in UTR |
| BICD1   | NM_001003398 | bicaudal D homolog 1 (Drosophila)                          | 0 | 0 | 0 | 0 | 1 | 0 | 1 | 0 | hsa-miR-622 | -0.16 | N/A | Sites in UTR |
| USP4    | NM_003363    | ubiquitin specific peptidase 4 (proto-oncogene)            | 0 | 0 | 0 | 0 | 1 | 0 | 1 | 0 | hsa-miR-622 | -0.16 | N/A | Sites in UTR |
| SHANK2  | NM_012309    | SH3 and multiple ankyrin repeat domains 2                  | 0 | 0 | 0 | 0 | 1 | 0 | 1 | 0 | hsa-miR-622 | -0.16 | N/A | Sites in UTR |
| PKN3    | NM_013355    | protein kinase N3                                          | 0 | 0 | 0 | 0 | 1 | 0 | 1 | 0 | hsa-miR-622 | -0.16 | N/A | Sites in UTR |
| IPO11   | NM_001134779 | importin 11                                                | 0 | 0 | 0 | 0 | 1 | 0 | 1 | 0 | hsa-miR-622 | -0.16 | N/A | Sites in UTR |
| PLXDC1  | NM_020405    | plexin domain containing 1                                 | 0 | 0 | 0 | 0 | 1 | 0 | 1 | 0 | hsa-miR-622 | -0.16 | N/A | Sites in UTR |
| HOXA1   | NM_005522    | homeobox A1                                                | 0 | 0 | 0 | 0 | 1 | 0 | 0 | 1 | hsa-miR-622 | -0.16 | N/A | Sites in UTR |
| CMAS    | NM_018686    | cytidine monophosphate N-acetylneuraminic acid synthetase  | 0 | 0 | 0 | 0 | 1 | 0 | 0 | 1 | hsa-miR-622 | -0.16 | N/A | Sites in UTR |
| MCEE    | NM_032601    | methylmalonyl CoA epimerase                                | 0 | 0 | 0 | 0 | 1 | 0 | 0 | 1 | hsa-miR-622 | -0.16 | N/A | Sites in UTR |
| RASGRF2 | NM_006909    | Ras protein-specific guanine nucleotide-releasing factor 2 | 0 | 0 | 0 | 0 | 1 | 0 | 1 | 0 | hsa-miR-622 | -0.16 | N/A | Sites in UTR |
| CHST4   | NM_001166395 | carbohydrate (N-acetylglucosamine 6-O) sulfotransferase 4  | 0 | 0 | 0 | 0 | 1 | 0 | 1 | 0 | hsa-miR-622 | -0.16 | N/A | Sites in UTR |
| ODZ2    | NM_001122679 | odz, odd Oz/ten-m homolog 2 (Drosophila)                   | 1 | 0 | 1 | 0 | 0 | 0 | 0 | 0 | hsa-miR-622 | -0.16 | N/A | Sites in UTR |
| KCTD2   | NM_015353    | potassium channel tetramerisation domain containing 2      | 0 | 0 | 0 | 0 | 2 | 1 | 1 | 0 | hsa-miR-622 | -0.16 | N/A | Sites in UTR |
| ZIC1    | NM_003412    | Zic family member 1                                        | 0 | 0 | 0 | 0 | 1 | 0 | 0 | 1 | hsa-miR-622 | -0.16 | N/A | Sites in UTR |



|         |              |                                                            |   |   |   |   |   |   |   |   |             |       |     |              |
|---------|--------------|------------------------------------------------------------|---|---|---|---|---|---|---|---|-------------|-------|-----|--------------|
| C2orf43 | NM_021925    | chromosome 2 open reading frame 43                         | 0 | 0 | 0 | 0 | 1 | 0 | 0 | 1 | hsa-miR-622 | -0.16 | N/A | Sites in UTR |
| LRRC34  | NM_001172780 | leucine rich repeat containing 34                          | 0 | 0 | 0 | 0 | 1 | 0 | 0 | 1 | hsa-miR-622 | -0.16 | N/A | Sites in UTR |
| KIF24   | NM_194313    | kinesin family member 24                                   | 0 | 0 | 0 | 0 | 1 | 0 | 0 | 1 | hsa-miR-622 | -0.16 | N/A | Sites in UTR |
| CTSC    | NM_001114173 | cathepsin C                                                | 0 | 0 | 0 | 0 | 1 | 0 | 1 | 0 | hsa-miR-622 | -0.16 | N/A | Sites in UTR |
| RGS7    | NM_002924    | regulator of G-protein signaling 7                         | 0 | 0 | 0 | 0 | 1 | 0 | 1 | 0 | hsa-miR-622 | -0.16 | N/A | Sites in UTR |
| NAT9    | NM_015654    | N-acetyltransferase 9 (GCN5-related, putative)             | 0 | 0 | 0 | 0 | 1 | 0 | 1 | 0 | hsa-miR-622 | -0.16 | N/A | Sites in UTR |
| ISOC2   | NM_001136201 | isochorismatase domain containing 2                        | 0 | 0 | 0 | 0 | 1 | 0 | 1 | 0 | hsa-miR-622 | -0.16 | N/A | Sites in UTR |
| PAR6G   | NM_032510    | par-6 partitioning defective 6 homolog gamma (C. elegans)  | 0 | 0 | 0 | 0 | 1 | 0 | 1 | 0 | hsa-miR-622 | -0.16 | N/A | Sites in UTR |
| RNGTT   | NM_003800    | RNA guanylyltransferase and 5'-phosphatase                 | 0 | 0 | 0 | 0 | 2 | 0 | 0 | 2 | hsa-miR-622 | -0.16 | N/A | Sites in UTR |
| SNRNP25 | NM_024571    | small nuclear ribonucleoprotein 25kDa (U11/U12)            | 0 | 0 | 0 | 0 | 2 | 0 | 0 | 2 | hsa-miR-622 | -0.16 | N/A | Sites in UTR |
| PAK6    | NM_001128628 | p21 protein (Cdc42/Rac)-activated kinase 6                 | 0 | 0 | 0 | 0 | 2 | 0 | 2 | 0 | hsa-miR-622 | -0.16 | N/A | Sites in UTR |
| SPOPL   | NM_001001664 | speckle-type POZ protein-like                              | 1 | 0 | 0 | 1 | 0 | 0 | 0 | 0 | hsa-miR-622 | -0.16 | N/A | Sites in UTR |
| SELP    | NM_003005    | selectin P (granule membrane protein 140kDa, antigen CD62) | 0 | 0 | 0 | 0 | 1 | 0 | 1 | 0 | hsa-miR-622 | -0.16 | N/A | Sites in UTR |
| SPDYE3  | NM_001004351 | speedy homolog E3 (Xenopus laevis)                         | 0 | 0 | 0 | 0 | 1 | 0 | 1 | 0 | hsa-miR-622 | -0.16 | N/A | Sites in UTR |
| RAB21   | NM_014999    | RAB21, member RAS oncogene family                          | 0 | 0 | 0 | 0 | 1 | 0 | 0 | 1 | hsa-miR-622 | -0.16 | N/A | Sites in UTR |
| AIM1    | NM_001624    | absent in melanoma 1                                       | 0 | 0 | 0 | 0 | 1 | 0 | 1 | 0 | hsa-miR-622 | -0.16 | N/A | Sites in UTR |
| KITLG   | NM_000899    | KIT ligand                                                 | 0 | 0 | 0 | 0 | 1 | 0 | 1 | 0 | hsa-miR-622 | -0.16 | N/A | Sites in UTR |
| MNT     | NM_020310    | MAX binding protein                                        | 1 | 0 | 1 | 0 | 0 | 0 | 0 | 0 | hsa-miR-622 | -0.16 | N/A | Sites in UTR |

|          |              |                                                                            |   |   |   |   |   |   |   |   |             |       |     |              |
|----------|--------------|----------------------------------------------------------------------------|---|---|---|---|---|---|---|---|-------------|-------|-----|--------------|
| BTBD7    | NM_001002860 | BTB (POZ) domain containing 7                                              | 0 | 0 | 0 | 0 | 1 | 0 | 1 | 0 | hsa-miR-622 | -0.16 | N/A | Sites in UTR |
| KIAA1211 | NM_020722    | KIAA1211                                                                   | 1 | 0 | 1 | 0 | 0 | 0 | 0 | 0 | hsa-miR-622 | -0.16 | N/A | Sites in UTR |
| GIGYF1   | NM_022574    | GRB10 interacting GYF protein 1                                            | 0 | 0 | 0 | 0 | 1 | 0 | 1 | 0 | hsa-miR-622 | -0.16 | N/A | Sites in UTR |
| RBM17    | NM_001145547 | RNA binding motif protein 17                                               | 0 | 0 | 0 | 0 | 1 | 0 | 1 | 0 | hsa-miR-622 | -0.16 | N/A | Sites in UTR |
| RASSF8   | NM_001164746 | Ras association (RalGDS/AF-6) domain family (N-terminal) member 8          | 0 | 0 | 0 | 0 | 2 | 0 | 1 | 1 | hsa-miR-622 | -0.16 | N/A | Sites in UTR |
| FAM127A  | NM_001078171 | family with sequence similarity 127, member A                              | 0 | 0 | 0 | 0 | 2 | 0 | 2 | 0 | hsa-miR-622 | -0.16 | N/A | Sites in UTR |
| FBXW7    | NM_001013415 | F-box and WD repeat domain containing 7                                    | 1 | 1 | 0 | 0 | 0 | 0 | 0 | 0 | hsa-miR-622 | -0.16 | N/A | Sites in UTR |
| MDM4     | NM_001204171 | Mdm4 p53 binding protein homolog (mouse)                                   | 0 | 0 | 0 | 0 | 3 | 0 | 0 | 3 | hsa-miR-622 | -0.15 | N/A | Sites in UTR |
| ACOT8    | NM_005469    | acyl-CoA thioesterase 8                                                    | 0 | 0 | 0 | 0 | 1 | 0 | 0 | 1 | hsa-miR-622 | -0.15 | N/A | Sites in UTR |
| ELAVL1   | NM_001419    | ELAV (embryonic lethal, abnormal vision, Drosophila)-like 1 (Hu antigen R) | 0 | 0 | 0 | 0 | 1 | 0 | 1 | 0 | hsa-miR-622 | -0.15 | N/A | Sites in UTR |
| PLXND1   | NM_015103    | plexin D1                                                                  | 0 | 0 | 0 | 0 | 1 | 0 | 1 | 0 | hsa-miR-622 | -0.15 | N/A | Sites in UTR |
| EMCN     | NM_001159694 | endomucin                                                                  | 0 | 0 | 0 | 0 | 1 | 0 | 1 | 0 | hsa-miR-622 | -0.15 | N/A | Sites in UTR |
| SCN9A    | NM_002977    | sodium channel, voltage-gated, type IX, alpha subunit                      | 0 | 0 | 0 | 0 | 1 | 0 | 0 | 1 | hsa-miR-622 | -0.15 | N/A | Sites in UTR |
| PRPF4B   | NM_003913    | PRP4 pre-mRNA processing factor 4 homolog B (yeast)                        | 1 | 0 | 0 | 1 | 0 | 0 | 0 | 0 | hsa-miR-622 | -0.15 | N/A | Sites in UTR |
| FLRT3    | NM_013281    | fibronectin leucine rich transmembrane protein 3                           | 0 | 0 | 0 | 0 | 1 | 0 | 0 | 1 | hsa-miR-622 | -0.15 | N/A | Sites in UTR |
| SNX14    | NM_020468    | sorting nexin 14                                                           | 0 | 0 | 0 | 0 | 1 | 0 | 0 | 1 | hsa-miR-622 | -0.15 | N/A | Sites in UTR |
| KIAA1524 | NM_020890    | KIAA1524                                                                   | 0 | 0 | 0 | 0 | 1 | 0 | 0 | 1 | hsa-miR-622 | -0.15 | N/A | Sites in UTR |
| POTEC    | NM_001137671 | POTE ankyrin domain family, member C                                       | 0 | 0 | 0 | 0 | 1 | 0 | 0 | 1 | hsa-miR-622 | -0.15 | N/A | Sites in UTR |

|              |              |                                                                                                   |   |   |   |   |   |   |   |   |             |       |     |              |
|--------------|--------------|---------------------------------------------------------------------------------------------------|---|---|---|---|---|---|---|---|-------------|-------|-----|--------------|
| FAM155A      | NM_001080396 | family with sequence similarity 155, member A                                                     | 0 | 0 | 0 | 0 | 1 | 0 | 0 | 1 | hsa-miR-622 | -0.15 | N/A | Sites in UTR |
| ME1          | NM_002395    | malic enzyme 1, NADP(+)-dependent, cytosolic                                                      | 0 | 0 | 0 | 0 | 1 | 0 | 1 | 0 | hsa-miR-622 | -0.15 | N/A | Sites in UTR |
| RBM7         | NM_016090    | RNA binding motif protein 7                                                                       | 0 | 0 | 0 | 0 | 1 | 0 | 1 | 0 | hsa-miR-622 | -0.15 | N/A | Sites in UTR |
| ARL15        | NM_019087    | ADP-ribosylation factor-like 15                                                                   | 0 | 0 | 0 | 0 | 1 | 0 | 1 | 0 | hsa-miR-622 | -0.15 | N/A | Sites in UTR |
| LRP2BP       | NM_018409    | LRP2 binding protein                                                                              | 0 | 0 | 0 | 0 | 1 | 0 | 1 | 0 | hsa-miR-622 | -0.15 | N/A | Sites in UTR |
| SHANK3       | NM_001080420 | SH3 and multiple ankyrin repeat domains 3                                                         | 1 | 0 | 1 | 0 | 0 | 0 | 0 | 0 | hsa-miR-622 | -0.15 | N/A | Sites in UTR |
| RMI2         | NM_152308    | RMI2, RecQ mediated genome instability 2, homolog (S. cerevisiae)                                 | 0 | 0 | 0 | 0 | 1 | 0 | 1 | 0 | hsa-miR-622 | -0.15 | N/A | Sites in UTR |
| MAP3K12      | NM_001193511 | mitogen-activated protein kinase kinase kinase 12                                                 | 0 | 0 | 0 | 0 | 2 | 0 | 0 | 2 | hsa-miR-622 | -0.15 | N/A | Sites in UTR |
| DEFB132      | NM_207469    | defensin, beta 132                                                                                | 0 | 0 | 0 | 0 | 2 | 0 | 1 | 1 | hsa-miR-622 | -0.15 | N/A | Sites in UTR |
| MOBK13       | NM_001100819 | MOB1, Mps One Binder kinase activator-like 3 (yeast)                                              | 0 | 0 | 0 | 0 | 1 | 1 | 0 | 0 | hsa-miR-622 | -0.15 | N/A | Sites in UTR |
| HSPE1-MOBK13 | NM_001202485 | HSPE1-MOBK13 readthrough                                                                          | 0 | 0 | 0 | 0 | 1 | 1 | 0 | 0 | hsa-miR-622 | -0.15 | N/A | Sites in UTR |
| GSTM3        | NM_000849    | glutathione S-transferase mu 3 (brain)                                                            | 0 | 0 | 0 | 0 | 2 | 0 | 1 | 1 | hsa-miR-622 | -0.15 | N/A | Sites in UTR |
| SMARCA5      | NM_003601    | SWI/SNF related, matrix associated, actin dependent regulator of chromatin, subfamily a, member 5 | 0 | 0 | 0 | 0 | 3 | 0 | 0 | 3 | hsa-miR-622 | -0.15 | N/A | Sites in UTR |
| CALB1        | NM_004929    | calbindin 1, 28kDa                                                                                | 0 | 0 | 0 | 0 | 1 | 0 | 0 | 1 | hsa-miR-622 | -0.15 | N/A | Sites in UTR |
| NDUFB6       | NM_001199987 | NADH dehydrogenase (ubiquinone) 1 beta subcomplex, 6, 17kDa                                       | 0 | 0 | 0 | 0 | 1 | 0 | 0 | 1 | hsa-miR-622 | -0.15 | N/A | Sites in UTR |
| PF4V1        | NM_002620    | platelet factor 4 variant 1                                                                       | 0 | 0 | 0 | 0 | 1 | 0 | 0 | 1 | hsa-miR-622 | -0.15 | N/A | Sites in UTR |
| TFPI2        | NM_006528    | tissue factor pathway inhibitor 2                                                                 | 0 | 0 | 0 | 0 | 1 | 0 | 0 | 1 | hsa-miR-622 | -0.15 | N/A | Sites in UTR |
| C17orf78     | NM_173625    | chromosome 17 open reading frame 78                                                               | 0 | 0 | 0 | 0 | 1 | 0 | 0 | 1 | hsa-miR-622 | -0.15 | N/A | Sites in UTR |

|          |              |                                                                   |   |   |   |   |   |   |   |   |             |       |     |              |
|----------|--------------|-------------------------------------------------------------------|---|---|---|---|---|---|---|---|-------------|-------|-----|--------------|
| PTPRCAP  | NM_005608    | protein tyrosine phosphatase, receptor type, C-associated protein | 0 | 0 | 0 | 0 | 1 | 0 | 1 | 0 | hsa-miR-622 | -0.15 | N/A | Sites in UTR |
| MAP4K4   | NM_001242559 | mitogen-activated protein kinase kinase kinase kinase 4           | 1 | 0 | 1 | 0 | 0 | 0 | 0 | 0 | hsa-miR-622 | -0.15 | N/A | Sites in UTR |
| FXR2     | NM_004860    | fragile X mental retardation, autosomal homolog 2                 | 1 | 0 | 1 | 0 | 0 | 0 | 0 | 0 | hsa-miR-622 | -0.15 | N/A | Sites in UTR |
| SCAMP1   | NM_004866    | secretory carrier membrane protein 1                              | 0 | 0 | 0 | 0 | 1 | 1 | 0 | 0 | hsa-miR-622 | -0.15 | N/A | Sites in UTR |
| DZIP1    | NM_014934    | DAZ interacting protein 1                                         | 0 | 0 | 0 | 0 | 2 | 0 | 1 | 1 | hsa-miR-622 | -0.15 | N/A | Sites in UTR |
| SETD7    | NM_030648    | SET domain containing (lysine methyltransferase) 7                | 1 | 0 | 0 | 1 | 3 | 0 | 0 | 3 | hsa-miR-622 | -0.15 | N/A | Sites in UTR |
| PPP2CB   | NM_001009552 | protein phosphatase 2, catalytic subunit, beta isozyyme           | 0 | 0 | 0 | 0 | 1 | 0 | 0 | 1 | hsa-miR-622 | -0.15 | N/A | Sites in UTR |
| LRRC2    | NM_024512    | leucine rich repeat containing 2                                  | 0 | 0 | 0 | 0 | 1 | 0 | 0 | 1 | hsa-miR-622 | -0.15 | N/A | Sites in UTR |
| TRIM45   | NM_001145635 | tripartite motif containing 45                                    | 0 | 0 | 0 | 0 | 1 | 0 | 0 | 1 | hsa-miR-622 | -0.15 | N/A | Sites in UTR |
| KRT31    | NM_002277    | keratin 31                                                        | 0 | 0 | 0 | 0 | 1 | 0 | 1 | 0 | hsa-miR-622 | -0.15 | N/A | Sites in UTR |
| UNG      | NM_003362    | uracil-DNA glycosylase                                            | 0 | 0 | 0 | 0 | 1 | 0 | 1 | 0 | hsa-miR-622 | -0.15 | N/A | Sites in UTR |
| CLDN6    | NM_021195    | claudin 6                                                         | 0 | 0 | 0 | 0 | 1 | 0 | 1 | 0 | hsa-miR-622 | -0.15 | N/A | Sites in UTR |
| METTL21B | NM_015433    | methyltransferase like 21B                                        | 0 | 0 | 0 | 0 | 1 | 0 | 1 | 0 | hsa-miR-622 | -0.15 | N/A | Sites in UTR |
| VARS2    | NM_001167733 | valyl-tRNA synthetase 2, mitochondrial (putative)                 | 0 | 0 | 0 | 0 | 1 | 0 | 1 | 0 | hsa-miR-622 | -0.15 | N/A | Sites in UTR |
| HDHD2    | NM_032124    | haloacid dehalogenase-like hydrolase domain containing 2          | 0 | 0 | 0 | 0 | 1 | 0 | 1 | 0 | hsa-miR-622 | -0.15 | N/A | Sites in UTR |
| CNDP2    | NM_001168499 | CNDP dipeptidase 2 (metallopeptidase M20 family)                  | 0 | 0 | 0 | 0 | 2 | 0 | 1 | 1 | hsa-miR-622 | -0.15 | N/A | Sites in UTR |
| B4GALT5  | NM_004776    | UDP-Gal:betaGlcNAc beta 1,4- galactosyltransferase, polypeptide 5 | 0 | 0 | 0 | 0 | 1 | 1 | 0 | 0 | hsa-miR-622 | -0.15 | N/A | Sites in UTR |
| FAM22D   | NM_001009610 | family with sequence similarity 22, member D                      | 0 | 0 | 0 | 0 | 3 | 0 | 2 | 1 | hsa-miR-622 | -0.15 | N/A | Sites in UTR |

|          |              |                                                                            |   |   |   |   |   |   |   |   |             |       |     |              |
|----------|--------------|----------------------------------------------------------------------------|---|---|---|---|---|---|---|---|-------------|-------|-----|--------------|
| CMKLR1   | NM_001142343 | chemokine-like receptor 1                                                  | 0 | 0 | 0 | 0 | 1 | 0 | 0 | 1 | hsa-miR-622 | -0.15 | N/A | Sites in UTR |
| SCP2     | NM_001007099 | sterol carrier protein 2                                                   | 0 | 0 | 0 | 0 | 1 | 0 | 0 | 1 | hsa-miR-622 | -0.15 | N/A | Sites in UTR |
| ZNF69    | NM_021915    | zinc finger protein 69                                                     | 0 | 0 | 0 | 0 | 1 | 0 | 0 | 1 | hsa-miR-622 | -0.15 | N/A | Sites in UTR |
| CSAD     | NM_015989    | cysteine sulfinic acid decarboxylase                                       | 0 | 0 | 0 | 0 | 1 | 0 | 0 | 1 | hsa-miR-622 | -0.15 | N/A | Sites in UTR |
| ARHGAP20 | NM_020809    | Rho GTPase activating protein 20                                           | 0 | 0 | 0 | 0 | 1 | 0 | 0 | 1 | hsa-miR-622 | -0.15 | N/A | Sites in UTR |
| ACTR6    | NM_022496    | ARP6 actin-related protein 6 homolog (yeast)                               | 0 | 0 | 0 | 0 | 1 | 0 | 0 | 1 | hsa-miR-622 | -0.15 | N/A | Sites in UTR |
| PAGE2    | NM_207339    | P antigen family, member 2 (prostate associated)                           | 0 | 0 | 0 | 0 | 1 | 0 | 0 | 1 | hsa-miR-622 | -0.15 | N/A | Sites in UTR |
| PAGE2B   | NM_001015038 | P antigen family, member 2B                                                | 0 | 0 | 0 | 0 | 1 | 0 | 0 | 1 | hsa-miR-622 | -0.15 | N/A | Sites in UTR |
| MAOA     | NM_000240    | monoamine oxidase A                                                        | 0 | 0 | 0 | 0 | 1 | 0 | 1 | 0 | hsa-miR-622 | -0.15 | N/A | Sites in UTR |
| CMTM6    | NM_017801    | CKLF-like MARVEL transmembrane domain containing 6                         | 0 | 0 | 0 | 0 | 1 | 0 | 1 | 0 | hsa-miR-622 | -0.15 | N/A | Sites in UTR |
| SHC4     | NM_203349    | SHC (Src homology 2 domain containing) family, member 4                    | 0 | 0 | 0 | 0 | 1 | 0 | 1 | 0 | hsa-miR-622 | -0.15 | N/A | Sites in UTR |
| PLDN     | NM_012388    | pallidin homolog (mouse)                                                   | 0 | 0 | 0 | 0 | 2 | 0 | 0 | 2 | hsa-miR-622 | -0.15 | N/A | Sites in UTR |
| PDGFB    | NM_002608    | platelet-derived growth factor beta polypeptide                            | 1 | 0 | 1 | 0 | 1 | 0 | 0 | 1 | hsa-miR-622 | -0.15 | N/A | Sites in UTR |
| PFKFB4   | NM_004567    | 6-phosphofructo-2-kinase/fructose-2,6-bisphosphatase 4                     | 0 | 0 | 0 | 0 | 2 | 0 | 2 | 0 | hsa-miR-622 | -0.15 | N/A | Sites in UTR |
| MLL      | NM_001197104 | myeloid/lymphoid or mixed-lineage leukemia (trithorax homolog, Drosophila) | 0 | 0 | 0 | 0 | 2 | 0 | 0 | 2 | hsa-miR-622 | -0.15 | N/A | Sites in UTR |
| PHOX2B   | NM_003924    | paired-like homeobox 2b                                                    | 0 | 0 | 0 | 0 | 2 | 0 | 2 | 0 | hsa-miR-622 | -0.15 | N/A | Sites in UTR |
| FYCO1    | NM_024513    | FYVE and coiled-coil domain containing 1                                   | 0 | 0 | 0 | 0 | 3 | 0 | 0 | 3 | hsa-miR-622 | -0.15 | N/A | Sites in UTR |
| TCF7L2   | NM_001146274 | transcription factor 7-like 2 (T-cell specific, HMG-box)                   | 1 | 0 | 0 | 1 | 0 | 0 | 0 | 0 | hsa-miR-622 | -0.15 | N/A | Sites in UTR |

|          |              |                                               |   |   |   |   |   |   |   |   |             |       |     |              |
|----------|--------------|-----------------------------------------------|---|---|---|---|---|---|---|---|-------------|-------|-----|--------------|
| PCLO     | NM_014510    | piccolo (presynaptic cytomatrix protein)      | 0 | 0 | 0 | 0 | 1 | 0 | 0 | 1 | hsa-miR-622 | -0.15 | N/A | Sites in UTR |
| SH3GLB1  | NM_001206651 | SH3-domain GRB2-like endophilin B1            | 0 | 0 | 0 | 0 | 1 | 0 | 0 | 1 | hsa-miR-622 | -0.15 | N/A | Sites in UTR |
| IP6K1    | NM_001006115 | inositol hexakisphosphate kinase 1            | 0 | 0 | 0 | 0 | 1 | 0 | 1 | 0 | hsa-miR-622 | -0.15 | N/A | Sites in UTR |
| PCDH17   | NM_001040429 | protocadherin 17                              | 0 | 0 | 0 | 0 | 1 | 0 | 1 | 0 | hsa-miR-622 | -0.15 | N/A | Sites in UTR |
| FAM164C  | NM_001042430 | family with sequence similarity 164, member C | 0 | 0 | 0 | 0 | 1 | 0 | 1 | 0 | hsa-miR-622 | -0.15 | N/A | Sites in UTR |
| C8orf45  | NM_173518    | chromosome 8 open reading frame 45            | 0 | 0 | 0 | 0 | 1 | 0 | 1 | 0 | hsa-miR-622 | -0.15 | N/A | Sites in UTR |
| NRIP3    | NM_020645    | nuclear receptor interacting protein 3        | 0 | 0 | 0 | 0 | 2 | 0 | 0 | 2 | hsa-miR-622 | -0.15 | N/A | Sites in UTR |
| DLK2     | NM_023932    | delta-like 2 homolog (Drosophila)             | 0 | 0 | 0 | 0 | 1 | 0 | 1 | 0 | hsa-miR-622 | -0.15 | N/A | Sites in UTR |
| VSTM4    | NM_001031746 | V-set and transmembrane domain containing 4   | 0 | 0 | 0 | 0 | 1 | 1 | 0 | 0 | hsa-miR-622 | -0.15 | N/A | Sites in UTR |
| MAPK14   | NM_001315    | mitogen-activated protein kinase 14           | 0 | 0 | 0 | 0 | 2 | 1 | 1 | 0 | hsa-miR-622 | -0.15 | N/A | Sites in UTR |
| CXCR4    | NM_001008540 | chemokine (C-X-C motif) receptor 4            | 1 | 0 | 0 | 1 | 0 | 0 | 0 | 0 | hsa-miR-622 | -0.15 | N/A | Sites in UTR |
| DYNLL1   | NM_001037494 | dynein, light chain, LC8-type 1               | 0 | 0 | 0 | 0 | 1 | 0 | 0 | 1 | hsa-miR-622 | -0.15 | N/A | Sites in UTR |
| ZNF460   | NM_006635    | zinc finger protein 460                       | 0 | 0 | 0 | 0 | 1 | 0 | 0 | 1 | hsa-miR-622 | -0.15 | N/A | Sites in UTR |
| SLC25A33 | NM_032315    | solute carrier family 25, member 33           | 0 | 0 | 0 | 0 | 1 | 0 | 0 | 1 | hsa-miR-622 | -0.15 | N/A | Sites in UTR |
| HDDC2    | NM_016063    | HD domain containing 2                        | 0 | 0 | 0 | 0 | 1 | 0 | 1 | 0 | hsa-miR-622 | -0.15 | N/A | Sites in UTR |
| NRN1     | NM_016588    | neuritin 1                                    | 0 | 0 | 0 | 0 | 1 | 0 | 1 | 0 | hsa-miR-622 | -0.15 | N/A | Sites in UTR |
| TMEM132E | NM_207313    | transmembrane protein 132E                    | 0 | 0 | 0 | 0 | 1 | 0 | 1 | 0 | hsa-miR-622 | -0.15 | N/A | Sites in UTR |
| ASB15    | NM_080928    | ankyrin repeat and SOCS box containing 15     | 0 | 0 | 0 | 0 | 1 | 0 | 1 | 0 | hsa-miR-622 | -0.15 | N/A | Sites in UTR |

|          |              |                                                                 |   |   |   |   |   |   |   |   |             |       |     |              |
|----------|--------------|-----------------------------------------------------------------|---|---|---|---|---|---|---|---|-------------|-------|-----|--------------|
| MALT1    | NM_006785    | mucosa associated lymphoid tissue lymphoma translocation gene 1 | 0 | 0 | 0 | 0 | 2 | 0 | 0 | 2 | hsa-miR-622 | -0.15 | N/A | Sites in UTR |
| NTRK2    | NM_001007097 | neurotrophic tyrosine kinase, receptor, type 2                  | 0 | 0 | 0 | 0 | 1 | 1 | 0 | 0 | hsa-miR-622 | -0.15 | N/A | Sites in UTR |
| ZFAND5   | NM_001102420 | zinc finger, AN1-type domain 5                                  | 1 | 0 | 0 | 1 | 0 | 0 | 0 | 0 | hsa-miR-622 | -0.15 | N/A | Sites in UTR |
| CLDN14   | NM_001146077 | claudin 14                                                      | 0 | 0 | 0 | 0 | 1 | 0 | 0 | 1 | hsa-miR-622 | -0.15 | N/A | Sites in UTR |
| KIAA1324 | NM_020775    | KIAA1324                                                        | 1 | 0 | 0 | 1 | 0 | 0 | 0 | 0 | hsa-miR-622 | -0.15 | N/A | Sites in UTR |
| KLK7     | NM_001207053 | kallikrein-related peptidase 7                                  | 0 | 0 | 0 | 0 | 1 | 0 | 1 | 0 | hsa-miR-622 | -0.15 | N/A | Sites in UTR |
| PTPN3    | NM_001145368 | protein tyrosine phosphatase, non-receptor type 3               | 0 | 0 | 0 | 0 | 1 | 0 | 1 | 0 | hsa-miR-622 | -0.15 | N/A | Sites in UTR |
| CCDC76   | NM_019083    | coiled-coil domain containing 76                                | 0 | 0 | 0 | 0 | 1 | 0 | 1 | 0 | hsa-miR-622 | -0.15 | N/A | Sites in UTR |
| LARP1B   | NM_032239    | La ribonucleoprotein domain family, member 1B                   | 0 | 0 | 0 | 0 | 1 | 0 | 1 | 0 | hsa-miR-622 | -0.15 | N/A | Sites in UTR |
| MCOLN3   | NM_018298    | mucolipin 3                                                     | 0 | 0 | 0 | 0 | 1 | 0 | 1 | 0 | hsa-miR-622 | -0.15 | N/A | Sites in UTR |
| PDGFC    | NM_016205    | platelet derived growth factor C                                | 0 | 0 | 0 | 0 | 1 | 0 | 1 | 0 | hsa-miR-622 | -0.15 | N/A | Sites in UTR |
| CAMKK1   | NM_032294    | calcium/calmodulin-dependent protein kinase kinase 1, alpha     | 0 | 0 | 0 | 0 | 1 | 0 | 1 | 0 | hsa-miR-622 | -0.15 | N/A | Sites in UTR |
| FAM75D4  | NM_001145197 | family with sequence similarity 75, member D4                   | 0 | 0 | 0 | 0 | 1 | 0 | 1 | 0 | hsa-miR-622 | -0.15 | N/A | Sites in UTR |
| FAM75D3  | NM_207416    | family with sequence similarity 75, member D3                   | 0 | 0 | 0 | 0 | 1 | 0 | 1 | 0 | hsa-miR-622 | -0.15 | N/A | Sites in UTR |
| RAP2B    | NM_002886    | RAP2B, member of RAS oncogene family                            | 0 | 0 | 0 | 0 | 2 | 0 | 0 | 2 | hsa-miR-622 | -0.15 | N/A | Sites in UTR |
| TGFβ3    | NM_003239    | transforming growth factor, beta 3                              | 0 | 0 | 0 | 0 | 2 | 0 | 1 | 1 | hsa-miR-622 | -0.15 | N/A | Sites in UTR |
| FAM105B  | NM_138348    | family with sequence similarity 105, member B                   | 1 | 0 | 1 | 0 | 1 | 0 | 0 | 1 | hsa-miR-622 | -0.15 | N/A | Sites in UTR |
| GREB1    | NM_014668    | growth regulation by estrogen in breast cancer 1                | 0 | 0 | 0 | 0 | 1 | 1 | 0 | 0 | hsa-miR-622 | -0.15 | N/A | Sites in UTR |

|          |              |                                                                           |   |   |   |   |   |   |   |   |             |       |     |              |
|----------|--------------|---------------------------------------------------------------------------|---|---|---|---|---|---|---|---|-------------|-------|-----|--------------|
| PTPMT1   | NM_001143984 | protein tyrosine phosphatase, mitochondrial 1                             | 0 | 0 | 0 | 0 | 1 | 1 | 0 | 0 | hsa-miR-622 | -0.15 | N/A | Sites in UTR |
| C11orf41 | NM_012194    | chromosome 11 open reading frame 41                                       | 1 | 0 | 1 | 0 | 1 | 0 | 0 | 1 | hsa-miR-622 | -0.15 | N/A | Sites in UTR |
| ATP1A1   | NM_000701    | ATPase, Na <sup>+</sup> /K <sup>+</sup> transporting, alpha 1 polypeptide | 0 | 0 | 0 | 0 | 1 | 0 | 0 | 1 | hsa-miR-622 | -0.15 | N/A | Sites in UTR |
| PSG7     | NM_001206650 | pregnancy specific beta-1-glycoprotein 7 (gene/pseudogene)                | 0 | 0 | 0 | 0 | 1 | 0 | 0 | 1 | hsa-miR-622 | -0.15 | N/A | Sites in UTR |
| DDX47    | NM_016355    | DEAD (Asp-Glu-Ala-Asp) box polypeptide 47                                 | 0 | 0 | 0 | 0 | 1 | 0 | 0 | 1 | hsa-miR-622 | -0.15 | N/A | Sites in UTR |
| C11orf30 | NM_020193    | chromosome 11 open reading frame 30                                       | 0 | 0 | 0 | 0 | 1 | 0 | 0 | 1 | hsa-miR-622 | -0.15 | N/A | Sites in UTR |
| KIAA1407 | NM_020817    | KIAA1407                                                                  | 0 | 0 | 0 | 0 | 1 | 0 | 0 | 1 | hsa-miR-622 | -0.15 | N/A | Sites in UTR |
| HRAS     | NM_001130442 | v-Ha-ras Harvey rat sarcoma viral oncogene homolog                        | 0 | 0 | 0 | 0 | 1 | 0 | 1 | 0 | hsa-miR-622 | -0.15 | N/A | Sites in UTR |
| SNAP47   | NM_053052    | synaptosomal-associated protein, 47kDa                                    | 0 | 0 | 0 | 0 | 1 | 0 | 1 | 0 | hsa-miR-622 | -0.15 | N/A | Sites in UTR |
| BRP44    | NM_001143674 | brain protein 44                                                          | 0 | 0 | 0 | 0 | 2 | 0 | 0 | 2 | hsa-miR-622 | -0.15 | N/A | Sites in UTR |
| NUDCD3   | NM_015332    | NudC domain containing 3                                                  | 0 | 0 | 0 | 0 | 2 | 0 | 2 | 0 | hsa-miR-622 | -0.15 | N/A | Sites in UTR |
| OGN      | NM_014057    | osteoglycin                                                               | 0 | 0 | 0 | 0 | 1 | 0 | 0 | 1 | hsa-miR-622 | -0.14 | N/A | Sites in UTR |
| THBS1    | NM_003246    | thrombospondin 1                                                          | 0 | 0 | 0 | 0 | 1 | 0 | 0 | 1 | hsa-miR-622 | -0.14 | N/A | Sites in UTR |
| ZNF235   | NM_004234    | zinc finger protein 235                                                   | 0 | 0 | 0 | 0 | 1 | 0 | 0 | 1 | hsa-miR-622 | -0.14 | N/A | Sites in UTR |
| TNFSF15  | NM_001204344 | tumor necrosis factor (ligand) superfamily, member 15                     | 0 | 0 | 0 | 0 | 1 | 0 | 0 | 1 | hsa-miR-622 | -0.14 | N/A | Sites in UTR |
| IMPG2    | NM_016247    | interphotoreceptor matrix proteoglycan 2                                  | 0 | 0 | 0 | 0 | 1 | 0 | 0 | 1 | hsa-miR-622 | -0.14 | N/A | Sites in UTR |
| METTL4   | NM_022840    | methyltransferase like 4                                                  | 0 | 0 | 0 | 0 | 1 | 0 | 0 | 1 | hsa-miR-622 | -0.14 | N/A | Sites in UTR |
| VPS37A   | NM_001145152 | vacuolar protein sorting 37 homolog A (S. cerevisiae)                     | 1 | 0 | 0 | 1 | 0 | 0 | 0 | 0 | hsa-miR-622 | -0.14 | N/A | Sites in UTR |



|          |              |                                                                     |   |   |   |   |   |   |   |   |             |       |     |              |
|----------|--------------|---------------------------------------------------------------------|---|---|---|---|---|---|---|---|-------------|-------|-----|--------------|
| TWF1     | NM_001242397 | twinfilin, actin-binding protein, homolog 1 (Drosophila)            | 0 | 0 | 0 | 0 | 1 | 0 | 1 | 0 | hsa-miR-622 | -0.14 | N/A | Sites in UTR |
| GLCE     | NM_015554    | glucuronic acid epimerase                                           | 0 | 0 | 0 | 0 | 1 | 0 | 1 | 0 | hsa-miR-622 | -0.14 | N/A | Sites in UTR |
| C1orf106 | NM_001142569 | chromosome 1 open reading frame 106                                 | 0 | 0 | 0 | 0 | 1 | 0 | 1 | 0 | hsa-miR-622 | -0.14 | N/A | Sites in UTR |
| PRKG1    | NM_001098512 | protein kinase, cGMP-dependent, type I                              | 0 | 0 | 0 | 0 | 2 | 0 | 0 | 2 | hsa-miR-622 | -0.14 | N/A | Sites in UTR |
| C22orf43 | NM_016449    | chromosome 22 open reading frame 43                                 | 0 | 0 | 0 | 0 | 1 | 0 | 0 | 1 | hsa-miR-622 | -0.14 | N/A | Sites in UTR |
| WDR11    | NM_018117    | WD repeat domain 11                                                 | 0 | 0 | 0 | 0 | 1 | 0 | 0 | 1 | hsa-miR-622 | -0.14 | N/A | Sites in UTR |
| C20orf72 | NM_052865    | chromosome 20 open reading frame 72                                 | 0 | 0 | 0 | 0 | 1 | 0 | 0 | 1 | hsa-miR-622 | -0.14 | N/A | Sites in UTR |
| ZNF285   | NM_152354    | zinc finger protein 285                                             | 0 | 0 | 0 | 0 | 1 | 0 | 1 | 0 | hsa-miR-622 | -0.14 | N/A | Sites in UTR |
| CBLL1    | NM_024814    | Cas-Br-M (murine) ecotropic retroviral transforming sequence-like 1 | 0 | 0 | 0 | 0 | 1 | 0 | 1 | 0 | hsa-miR-622 | -0.14 | N/A | Sites in UTR |
| FAM92B   | NM_198491    | family with sequence similarity 92, member B                        | 0 | 0 | 0 | 0 | 1 | 0 | 1 | 0 | hsa-miR-622 | -0.14 | N/A | Sites in UTR |
| KCNE1    | NM_000219    | potassium voltage-gated channel, Isk-related family, member 1       | 0 | 0 | 0 | 0 | 1 | 1 | 0 | 0 | hsa-miR-622 | -0.14 | N/A | Sites in UTR |
| DENND4A  | NM_001144823 | DENN/MADD domain containing 4A                                      | 0 | 0 | 0 | 0 | 1 | 1 | 0 | 0 | hsa-miR-622 | -0.14 | N/A | Sites in UTR |
| ZNF783   | NM_001195220 | zinc finger family member 783                                       | 0 | 0 | 0 | 0 | 3 | 0 | 3 | 0 | hsa-miR-622 | -0.14 | N/A | Sites in UTR |
| PDE8B    | NM_001029851 | phosphodiesterase 8B                                                | 0 | 0 | 0 | 0 | 1 | 0 | 0 | 1 | hsa-miR-622 | -0.14 | N/A | Sites in UTR |
| ENOPH1   | NM_021204    | enolase-phosphatase 1                                               | 0 | 0 | 0 | 0 | 1 | 0 | 0 | 1 | hsa-miR-622 | -0.14 | N/A | Sites in UTR |
| CAB39L   | NM_001079670 | calcium binding protein 39-like                                     | 0 | 0 | 0 | 0 | 1 | 0 | 0 | 1 | hsa-miR-622 | -0.14 | N/A | Sites in UTR |
| MYOCD    | NM_001146313 | myocardin                                                           | 0 | 0 | 0 | 0 | 1 | 0 | 0 | 1 | hsa-miR-622 | -0.14 | N/A | Sites in UTR |
| NPPA     | NM_006172    | natriuretic peptide A                                               | 0 | 0 | 0 | 0 | 1 | 0 | 1 | 0 | hsa-miR-622 | -0.14 | N/A | Sites in UTR |

|         |              |                                                              |   |   |   |   |   |   |   |   |             |       |     |              |
|---------|--------------|--------------------------------------------------------------|---|---|---|---|---|---|---|---|-------------|-------|-----|--------------|
| NSUN2   | NM_001193455 | NOP2/Sun domain family, member 2                             | 0 | 0 | 0 | 0 | 1 | 0 | 1 | 0 | hsa-miR-622 | -0.14 | N/A | Sites in UTR |
| PGAP3   | NM_033419    | post-GPI attachment to proteins 3                            | 0 | 0 | 0 | 0 | 1 | 0 | 1 | 0 | hsa-miR-622 | -0.14 | N/A | Sites in UTR |
| GSK3B   | NM_001146156 | glycogen synthase kinase 3 beta                              | 0 | 0 | 0 | 0 | 1 | 1 | 0 | 0 | hsa-miR-622 | -0.14 | N/A | Sites in UTR |
| ABCD2   | NM_005164    | ATP-binding cassette, sub-family D (ALD), member 2           | 0 | 0 | 0 | 0 | 2 | 0 | 0 | 2 | hsa-miR-622 | -0.14 | N/A | Sites in UTR |
| SAMD12  | NM_001101676 | sterile alpha motif domain containing 12                     | 1 | 0 | 1 | 0 | 2 | 1 | 0 | 1 | hsa-miR-622 | -0.14 | N/A | Sites in UTR |
| ALDH6A1 | NM_005589    | aldehyde dehydrogenase 6 family, member A1                   | 0 | 0 | 0 | 0 | 1 | 0 | 0 | 1 | hsa-miR-622 | -0.14 | N/A | Sites in UTR |
| RELL1   | NM_001085400 | RELT-like 1                                                  | 0 | 0 | 0 | 0 | 1 | 0 | 0 | 1 | hsa-miR-622 | -0.14 | N/A | Sites in UTR |
| SLC29A3 | NM_001174098 | solute carrier family 29 (nucleoside transporters), member 3 | 0 | 0 | 0 | 0 | 1 | 0 | 1 | 0 | hsa-miR-622 | -0.14 | N/A | Sites in UTR |
| BCORL1  | NM_021946    | BCL6 corepressor-like 1                                      | 1 | 0 | 1 | 0 | 0 | 0 | 0 | 0 | hsa-miR-622 | -0.14 | N/A | Sites in UTR |
| C5orf20 | NM_130848    | chromosome 5 open reading frame 20                           | 0 | 0 | 0 | 0 | 1 | 0 | 1 | 0 | hsa-miR-622 | -0.14 | N/A | Sites in UTR |
| SPPL3   | NM_139015    | signal peptide peptidase-like 3                              | 1 | 0 | 1 | 0 | 1 | 0 | 0 | 1 | hsa-miR-622 | -0.14 | N/A | Sites in UTR |
| MEGF8   | NM_001410    | multiple EGF-like-domains 8                                  | 0 | 0 | 0 | 0 | 2 | 1 | 0 | 1 | hsa-miR-622 | -0.14 | N/A | Sites in UTR |
| ZNF445  | NM_181489    | zinc finger protein 445                                      | 0 | 0 | 0 | 0 | 2 | 0 | 1 | 1 | hsa-miR-622 | -0.14 | N/A | Sites in UTR |
| PTGFRN  | NM_020440    | prostaglandin F2 receptor negative regulator                 | 1 | 0 | 0 | 1 | 2 | 0 | 1 | 1 | hsa-miR-622 | -0.14 | N/A | Sites in UTR |
| RNF8    | NM_003958    | ring finger protein 8                                        | 0 | 0 | 0 | 0 | 3 | 1 | 1 | 1 | hsa-miR-622 | -0.14 | N/A | Sites in UTR |
| UBE3C   | NM_014671    | ubiquitin protein ligase E3C                                 | 0 | 0 | 0 | 0 | 1 | 0 | 0 | 1 | hsa-miR-622 | -0.14 | N/A | Sites in UTR |
| EID2    | NM_153232    | EP300 interacting inhibitor of differentiation 2             | 0 | 0 | 0 | 0 | 1 | 0 | 0 | 1 | hsa-miR-622 | -0.14 | N/A | Sites in UTR |
| LCORL   | NM_001166139 | ligand dependent nuclear receptor corepressor-like           | 0 | 0 | 0 | 0 | 1 | 0 | 0 | 1 | hsa-miR-622 | -0.14 | N/A | Sites in UTR |

|          |              |                                                            |   |   |   |   |   |   |   |   |             |       |     |              |
|----------|--------------|------------------------------------------------------------|---|---|---|---|---|---|---|---|-------------|-------|-----|--------------|
| HAS3     | NM_001199280 | hyaluronan synthase 3                                      | 0 | 0 | 0 | 0 | 1 | 0 | 1 | 0 | hsa-miR-622 | -0.14 | N/A | Sites in UTR |
| PRKCA    | NM_002737    | protein kinase C, alpha                                    | 0 | 0 | 0 | 0 | 1 | 0 | 1 | 0 | hsa-miR-622 | -0.14 | N/A | Sites in UTR |
| C16orf70 | NM_025187    | chromosome 16 open reading frame 70                        | 0 | 0 | 0 | 0 | 1 | 0 | 1 | 0 | hsa-miR-622 | -0.14 | N/A | Sites in UTR |
| RCOR1    | NM_015156    | REST corepressor 1                                         | 0 | 0 | 0 | 0 | 3 | 0 | 2 | 1 | hsa-miR-622 | -0.14 | N/A | Sites in UTR |
| PAK3     | NM_001128166 | p21 protein (Cdc42/Rac)-activated kinase 3                 | 0 | 0 | 0 | 0 | 1 | 0 | 0 | 1 | hsa-miR-622 | -0.14 | N/A | Sites in UTR |
| SATB2    | NM_001172509 | SATB homeobox 2                                            | 0 | 0 | 0 | 0 | 1 | 0 | 0 | 1 | hsa-miR-622 | -0.14 | N/A | Sites in UTR |
| NCKIPSD  | NM_016453    | NCK interacting protein with SH3 domain                    | 0 | 0 | 0 | 0 | 1 | 0 | 0 | 1 | hsa-miR-622 | -0.14 | N/A | Sites in UTR |
| KCTD4    | NM_198404    | potassium channel tetramerisation domain containing 4      | 0 | 0 | 0 | 0 | 1 | 0 | 0 | 1 | hsa-miR-622 | -0.14 | N/A | Sites in UTR |
| CIITA    | NM_000246    | class II, major histocompatibility complex, transactivator | 0 | 0 | 0 | 0 | 1 | 0 | 1 | 0 | hsa-miR-622 | -0.14 | N/A | Sites in UTR |
| USP2     | NM_004205    | ubiquitin specific peptidase 2                             | 0 | 0 | 0 | 0 | 1 | 0 | 1 | 0 | hsa-miR-622 | -0.14 | N/A | Sites in UTR |
| GFOD1    | NM_001242628 | glucose-fructose oxidoreductase domain containing 1        | 0 | 0 | 0 | 0 | 1 | 0 | 1 | 0 | hsa-miR-622 | -0.14 | N/A | Sites in UTR |
| KIF12    | NM_138424    | kinesin family member 12                                   | 0 | 0 | 0 | 0 | 1 | 0 | 1 | 0 | hsa-miR-622 | -0.14 | N/A | Sites in UTR |
| FN1      | NM_054034    | fibronectin 1                                              | 0 | 0 | 0 | 0 | 1 | 0 | 0 | 1 | hsa-miR-622 | -0.14 | N/A | Sites in UTR |
| HELLS    | NM_018063    | helicase, lymphoid-specific                                | 0 | 0 | 0 | 0 | 1 | 0 | 0 | 1 | hsa-miR-622 | -0.14 | N/A | Sites in UTR |
| RPS26    | NM_001029    | ribosomal protein S26                                      | 0 | 0 | 0 | 0 | 1 | 0 | 0 | 1 | hsa-miR-622 | -0.14 | N/A | Sites in UTR |
| PHLPP1   | NM_194449    | PH domain and leucine rich repeat protein phosphatase 1    | 0 | 0 | 0 | 0 | 1 | 0 | 0 | 1 | hsa-miR-622 | -0.14 | N/A | Sites in UTR |
| ZNF451   | NM_001031623 | zinc finger protein 451                                    | 0 | 0 | 0 | 0 | 1 | 0 | 0 | 1 | hsa-miR-622 | -0.14 | N/A | Sites in UTR |
| TAB3     | NM_152787    | TGF-beta activated kinase 1/MAP3K7 binding protein 3       | 0 | 0 | 0 | 0 | 1 | 0 | 0 | 1 | hsa-miR-622 | -0.14 | N/A | Sites in UTR |

|         |              |                                                                               |   |   |   |   |   |   |   |   |             |       |     |              |
|---------|--------------|-------------------------------------------------------------------------------|---|---|---|---|---|---|---|---|-------------|-------|-----|--------------|
| ZNF568  | NM_001204835 | zinc finger protein 568                                                       | 0 | 0 | 0 | 0 | 1 | 0 | 0 | 1 | hsa-miR-622 | -0.14 | N/A | Sites in UTR |
| ARTN    | NM_001136215 | artemin                                                                       | 0 | 0 | 0 | 0 | 1 | 0 | 1 | 0 | hsa-miR-622 | -0.14 | N/A | Sites in UTR |
| ZMYND19 | NM_138462    | zinc finger, MYND-type containing 19                                          | 1 | 0 | 1 | 0 | 0 | 0 | 0 | 0 | hsa-miR-622 | -0.14 | N/A | Sites in UTR |
| CNTD1   | NM_173478    | cyclin N-terminal domain containing 1                                         | 1 | 0 | 1 | 0 | 0 | 0 | 0 | 0 | hsa-miR-622 | -0.14 | N/A | Sites in UTR |
| ZFP42   | NM_174900    | zinc finger protein 42 homolog (mouse)                                        | 0 | 0 | 0 | 0 | 1 | 0 | 1 | 0 | hsa-miR-622 | -0.14 | N/A | Sites in UTR |
| YPEL1   | NM_013313    | yippee-like 1 (Drosophila)                                                    | 0 | 0 | 0 | 0 | 1 | 1 | 0 | 0 | hsa-miR-622 | -0.14 | N/A | Sites in UTR |
| MUC20   | NM_001098516 | mucin 20, cell surface associated                                             | 0 | 0 | 0 | 0 | 2 | 0 | 1 | 1 | hsa-miR-622 | -0.14 | N/A | Sites in UTR |
| ITGA2   | NM_002203    | integrin, alpha 2 (CD49B, alpha 2 subunit of VLA-2 receptor)                  | 0 | 0 | 0 | 0 | 3 | 0 | 0 | 3 | hsa-miR-622 | -0.14 | N/A | Sites in UTR |
| ZNF555  | NM_001172775 | zinc finger protein 555                                                       | 0 | 0 | 0 | 0 | 3 | 0 | 2 | 1 | hsa-miR-622 | -0.14 | N/A | Sites in UTR |
| DNA2    | NM_001080449 | DNA replication helicase 2 homolog (yeast)                                    | 0 | 0 | 0 | 0 | 1 | 0 | 0 | 1 | hsa-miR-622 | -0.14 | N/A | Sites in UTR |
| STMN1   | NM_001145454 | stathmin 1                                                                    | 0 | 0 | 0 | 0 | 1 | 0 | 0 | 1 | hsa-miR-622 | -0.14 | N/A | Sites in UTR |
| HCFC2   | NM_013320    | host cell factor C2                                                           | 0 | 0 | 0 | 0 | 1 | 0 | 0 | 1 | hsa-miR-622 | -0.14 | N/A | Sites in UTR |
| ZNF454  | NM_001178089 | zinc finger protein 454                                                       | 0 | 0 | 0 | 0 | 1 | 0 | 0 | 1 | hsa-miR-622 | -0.14 | N/A | Sites in UTR |
| OAS2    | NM_001032731 | 2'-5'-oligoadenylate synthetase 2, 69/71kDa                                   | 0 | 0 | 0 | 0 | 1 | 0 | 1 | 0 | hsa-miR-622 | -0.14 | N/A | Sites in UTR |
| TFAP2C  | NM_003222    | transcription factor AP-2 gamma (activating enhancer binding protein 2 gamma) | 0 | 0 | 0 | 0 | 1 | 0 | 1 | 0 | hsa-miR-622 | -0.14 | N/A | Sites in UTR |
| LUZP1   | NM_001142546 | leucine zipper protein 1                                                      | 0 | 0 | 0 | 0 | 1 | 0 | 1 | 0 | hsa-miR-622 | -0.14 | N/A | Sites in UTR |
| SLC39A6 | NM_012319    | solute carrier family 39 (zinc transporter), member 6                         | 0 | 0 | 0 | 0 | 1 | 0 | 1 | 0 | hsa-miR-622 | -0.14 | N/A | Sites in UTR |
| NCCRP1  | NM_001001414 | non-specific cytotoxic cell receptor protein 1 homolog (zebrafish)            | 0 | 0 | 0 | 0 | 1 | 0 | 1 | 0 | hsa-miR-622 | -0.14 | N/A | Sites in UTR |

|         |              |                                                        |   |   |   |   |   |   |   |   |             |       |     |              |
|---------|--------------|--------------------------------------------------------|---|---|---|---|---|---|---|---|-------------|-------|-----|--------------|
| ELMO1   | NM_001039459 | engulfment and cell motility 1                         | 0 | 0 | 0 | 0 | 2 | 0 | 1 | 1 | hsa-miR-622 | -0.14 | N/A | Sites in UTR |
| DDX5    | NM_004396    | DEAD (Asp-Glu-Ala-Asp) box polypeptide 5               | 1 | 0 | 0 | 1 | 0 | 0 | 0 | 0 | hsa-miR-622 | -0.14 | N/A | Sites in UTR |
| GTF2H3  | NM_001516    | general transcription factor IIH, polypeptide 3, 34kDa | 0 | 0 | 0 | 0 | 1 | 0 | 0 | 1 | hsa-miR-622 | -0.14 | N/A | Sites in UTR |
| DNAJB1  | NM_006145    | DnaJ (Hsp40) homolog, subfamily B, member 1            | 1 | 0 | 0 | 1 | 0 | 0 | 0 | 0 | hsa-miR-622 | -0.14 | N/A | Sites in UTR |
| GPR180  | NM_180989    | G protein-coupled receptor 180                         | 0 | 0 | 0 | 0 | 1 | 0 | 0 | 1 | hsa-miR-622 | -0.14 | N/A | Sites in UTR |
| ABHD3   | NM_138340    | abhydrolase domain containing 3                        | 0 | 0 | 0 | 0 | 1 | 0 | 0 | 1 | hsa-miR-622 | -0.14 | N/A | Sites in UTR |
| PDXDC1  | NM_015027    | pyridoxal-dependent decarboxylase domain containing 1  | 0 | 0 | 0 | 0 | 1 | 0 | 1 | 0 | hsa-miR-622 | -0.14 | N/A | Sites in UTR |
| ANKRD12 | NM_001083625 | ankyrin repeat domain 12                               | 0 | 0 | 0 | 0 | 1 | 0 | 1 | 0 | hsa-miR-622 | -0.14 | N/A | Sites in UTR |
| REV1    | NM_001037872 | REV1 homolog ( <i>S. cerevisiae</i> )                  | 0 | 0 | 0 | 0 | 1 | 0 | 1 | 0 | hsa-miR-622 | -0.14 | N/A | Sites in UTR |
| SAV1    | NM_021818    | salvador homolog 1 ( <i>Drosophila</i> )               | 0 | 0 | 0 | 0 | 1 | 0 | 1 | 0 | hsa-miR-622 | -0.14 | N/A | Sites in UTR |
| FBR3    | NM_001105079 | fibrosin                                               | 1 | 0 | 1 | 0 | 0 | 0 | 0 | 0 | hsa-miR-622 | -0.14 | N/A | Sites in UTR |
| KLHDC7B | NM_138433    | kelch domain containing 7B                             | 0 | 0 | 0 | 0 | 1 | 0 | 1 | 0 | hsa-miR-622 | -0.14 | N/A | Sites in UTR |
| BMP8A   | NM_181809    | bone morphogenetic protein 8a                          | 0 | 0 | 0 | 0 | 1 | 0 | 1 | 0 | hsa-miR-622 | -0.14 | N/A | Sites in UTR |
| TFEC    | NM_001018058 | transcription factor EC                                | 0 | 0 | 0 | 0 | 2 | 0 | 0 | 2 | hsa-miR-622 | -0.14 | N/A | Sites in UTR |
| AGFG1   | NM_001135187 | ArfGAP with FG repeats 1                               | 1 | 0 | 1 | 0 | 1 | 0 | 0 | 1 | hsa-miR-622 | -0.14 | N/A | Sites in UTR |
| KCTD5   | NM_018992    | potassium channel tetramerisation domain containing 5  | 0 | 0 | 0 | 0 | 2 | 1 | 0 | 1 | hsa-miR-622 | -0.14 | N/A | Sites in UTR |
| SH3TC2  | NM_024577    | SH3 domain and tetratricopeptide repeats 2             | 0 | 0 | 0 | 0 | 4 | 0 | 2 | 2 | hsa-miR-622 | -0.14 | N/A | Sites in UTR |
| RYR2    | NM_001035    | ryanodine receptor 2 (cardiac)                         | 0 | 0 | 0 | 0 | 1 | 0 | 0 | 1 | hsa-miR-622 | -0.14 | N/A | Sites in UTR |

|           |              |                                                                      |   |   |   |   |   |   |   |   |             |       |     |              |
|-----------|--------------|----------------------------------------------------------------------|---|---|---|---|---|---|---|---|-------------|-------|-----|--------------|
| KALRN     | NM_001024660 | kalirin, RhoGEF kinase                                               | 0 | 0 | 0 | 0 | 1 | 0 | 0 | 1 | hsa-miR-622 | -0.14 | N/A | Sites in UTR |
| EAF2      | NM_018456    | ELL associated factor 2                                              | 0 | 0 | 0 | 0 | 1 | 0 | 0 | 1 | hsa-miR-622 | -0.14 | N/A | Sites in UTR |
| ZNF574    | NM_022752    | zinc finger protein 574                                              | 0 | 0 | 0 | 0 | 1 | 0 | 0 | 1 | hsa-miR-622 | -0.14 | N/A | Sites in UTR |
| TRMT2B    | NM_001167970 | TRM2 tRNA methyltransferase 2 homolog B (S. cerevisiae)              | 0 | 0 | 0 | 0 | 1 | 0 | 0 | 1 | hsa-miR-622 | -0.14 | N/A | Sites in UTR |
| TSHZ2     | NM_001193421 | teashirt zinc finger homeobox 2                                      | 1 | 0 | 0 | 1 | 0 | 0 | 0 | 0 | hsa-miR-622 | -0.14 | N/A | Sites in UTR |
| EML5      | NM_183387    | echinoderm microtubule associated protein like 5                     | 0 | 0 | 0 | 0 | 1 | 0 | 0 | 1 | hsa-miR-622 | -0.14 | N/A | Sites in UTR |
| MEFV      | NM_000243    | Mediterranean fever                                                  | 1 | 0 | 1 | 0 | 0 | 0 | 0 | 0 | hsa-miR-622 | -0.14 | N/A | Sites in UTR |
| ATP8A2    | NM_016529    | ATPase, aminophospholipid transporter, class I, type 8A, member 2    | 0 | 0 | 0 | 0 | 1 | 0 | 1 | 0 | hsa-miR-622 | -0.14 | N/A | Sites in UTR |
| SRGAP1    | NM_020762    | SLIT-ROBO Rho GTPase activating protein 1                            | 0 | 0 | 0 | 0 | 2 | 0 | 1 | 1 | hsa-miR-622 | -0.14 | N/A | Sites in UTR |
| LRR8C     | NM_032270    | leucine rich repeat containing 8 family, member C                    | 0 | 0 | 0 | 0 | 2 | 0 | 1 | 1 | hsa-miR-622 | -0.14 | N/A | Sites in UTR |
| PLCXD3    | NM_001005473 | phosphatidylinositol-specific phospholipase C, X domain containing 3 | 0 | 0 | 0 | 0 | 3 | 0 | 1 | 2 | hsa-miR-622 | -0.14 | N/A | Sites in UTR |
| CHIT1     | NM_003465    | chitinase 1 (chitotriosidase)                                        | 0 | 0 | 0 | 0 | 1 | 0 | 0 | 1 | hsa-miR-622 | -0.14 | N/A | Sites in UTR |
| DAZ1      | NM_004081    | deleted in azoospermia 1                                             | 0 | 0 | 0 | 0 | 1 | 0 | 0 | 1 | hsa-miR-622 | -0.14 | N/A | Sites in UTR |
| LMX1A     | NM_001174069 | LIM homeobox transcription factor 1, alpha                           | 1 | 0 | 0 | 1 | 0 | 0 | 0 | 0 | hsa-miR-622 | -0.14 | N/A | Sites in UTR |
| MSRB2     | NM_012228    | methionine sulfoxide reductase B2                                    | 0 | 0 | 0 | 0 | 1 | 0 | 0 | 1 | hsa-miR-622 | -0.14 | N/A | Sites in UTR |
| C10orf118 | NM_018017    | chromosome 10 open reading frame 118                                 | 0 | 0 | 0 | 0 | 1 | 0 | 0 | 1 | hsa-miR-622 | -0.14 | N/A | Sites in UTR |
| DAZ3      | NM_020364    | deleted in azoospermia 3                                             | 0 | 0 | 0 | 0 | 1 | 0 | 0 | 1 | hsa-miR-622 | -0.14 | N/A | Sites in UTR |
| DAZ2      | NM_001005785 | deleted in azoospermia 2                                             | 0 | 0 | 0 | 0 | 1 | 0 | 0 | 1 | hsa-miR-622 | -0.14 | N/A | Sites in UTR |

|         |              |                                                         |   |   |   |   |   |   |   |   |             |       |     |              |
|---------|--------------|---------------------------------------------------------|---|---|---|---|---|---|---|---|-------------|-------|-----|--------------|
| DAZ4    | NM_001005375 | deleted in azoospermia 4                                | 0 | 0 | 0 | 0 | 1 | 0 | 0 | 1 | hsa-miR-622 | -0.14 | N/A | Sites in UTR |
| WWC2    | NM_024949    | WW and C2 domain containing 2                           | 0 | 0 | 0 | 0 | 1 | 0 | 0 | 1 | hsa-miR-622 | -0.14 | N/A | Sites in UTR |
| AMAC1L2 | NM_054028    | acyl-malonyl condensing enzyme 1-like 2                 | 0 | 0 | 0 | 0 | 1 | 0 | 0 | 1 | hsa-miR-622 | -0.14 | N/A | Sites in UTR |
| ADAT2   | NM_182503    | adenosine deaminase, tRNA-specific 2                    | 0 | 0 | 0 | 0 | 1 | 0 | 0 | 1 | hsa-miR-622 | -0.14 | N/A | Sites in UTR |
| C8orf84 | NM_153225    | chromosome 8 open reading frame 84                      | 0 | 0 | 0 | 0 | 1 | 0 | 0 | 1 | hsa-miR-622 | -0.14 | N/A | Sites in UTR |
| SRP19   | NM_001204199 | signal recognition particle 19kDa                       | 0 | 0 | 0 | 0 | 1 | 0 | 1 | 0 | hsa-miR-622 | -0.14 | N/A | Sites in UTR |
| TRIB1   | NM_025195    | tribbles homolog 1 (Drosophila)                         | 0 | 0 | 0 | 0 | 1 | 0 | 1 | 0 | hsa-miR-622 | -0.14 | N/A | Sites in UTR |
| ARIH2   | NM_006321    | ariadne homolog 2 (Drosophila)                          | 0 | 0 | 0 | 0 | 1 | 0 | 1 | 0 | hsa-miR-622 | -0.14 | N/A | Sites in UTR |
| RPH3A   | NM_001143854 | rabphilin 3A homolog (mouse)                            | 0 | 0 | 0 | 0 | 1 | 0 | 1 | 0 | hsa-miR-622 | -0.14 | N/A | Sites in UTR |
| SPIRE2  | NM_032451    | spire homolog 2 (Drosophila)                            | 0 | 0 | 0 | 0 | 1 | 0 | 1 | 0 | hsa-miR-622 | -0.14 | N/A | Sites in UTR |
| AADACL3 | NM_001103169 | arylacetamide deacetylase-like 3                        | 0 | 0 | 0 | 0 | 1 | 0 | 1 | 0 | hsa-miR-622 | -0.14 | N/A | Sites in UTR |
| LRP11   | NM_032832    | low density lipoprotein receptor-related protein 11     | 0 | 0 | 0 | 0 | 2 | 0 | 0 | 2 | hsa-miR-622 | -0.14 | N/A | Sites in UTR |
| MMAB    | NM_052845    | methylmalonic aciduria (cobalamin deficiency) cblB type | 0 | 0 | 0 | 0 | 1 | 1 | 0 | 0 | hsa-miR-622 | -0.14 | N/A | Sites in UTR |
| TBX15   | NM_152380    | T-box 15                                                | 0 | 0 | 0 | 0 | 2 | 0 | 0 | 2 | hsa-miR-622 | -0.13 | N/A | Sites in UTR |
| BNIP2   | NM_004330    | BCL2/adenovirus E1B 19kDa interacting protein 2         | 1 | 0 | 0 | 1 | 0 | 0 | 0 | 0 | hsa-miR-622 | -0.13 | N/A | Sites in UTR |
| NR2F6   | NM_005234    | nuclear receptor subfamily 2, group F, member 6         | 0 | 0 | 0 | 0 | 1 | 0 | 0 | 1 | hsa-miR-622 | -0.13 | N/A | Sites in UTR |
| RARRES1 | NM_002888    | retinoic acid receptor responder (tazarotene induced) 1 | 0 | 0 | 0 | 0 | 1 | 0 | 0 | 1 | hsa-miR-622 | -0.13 | N/A | Sites in UTR |
| ZNF165  | NM_003447    | zinc finger protein 165                                 | 0 | 0 | 0 | 0 | 1 | 0 | 0 | 1 | hsa-miR-622 | -0.13 | N/A | Sites in UTR |

|          |              |                                                        |   |   |   |   |   |   |   |   |             |       |     |              |
|----------|--------------|--------------------------------------------------------|---|---|---|---|---|---|---|---|-------------|-------|-----|--------------|
| ZNF766   | NM_001010851 | zinc finger protein 766                                | 0 | 0 | 0 | 0 | 1 | 0 | 0 | 1 | hsa-miR-622 | -0.13 | N/A | Sites in UTR |
| IDH3B    | NM_006899    | isocitrate dehydrogenase 3 (NAD+) beta                 | 0 | 0 | 0 | 0 | 1 | 0 | 1 | 0 | hsa-miR-622 | -0.13 | N/A | Sites in UTR |
| MET      | NM_000245    | met proto-oncogene (hepatocyte growth factor receptor) | 0 | 0 | 0 | 0 | 1 | 0 | 1 | 0 | hsa-miR-622 | -0.13 | N/A | Sites in UTR |
| NUPL1    | NM_001008564 | nucleoporin like 1                                     | 0 | 0 | 0 | 0 | 2 | 0 | 2 | 0 | hsa-miR-622 | -0.13 | N/A | Sites in UTR |
| FAM108B1 | NM_001025780 | family with sequence similarity 108, member B1         | 0 | 0 | 0 | 0 | 1 | 0 | 1 | 0 | hsa-miR-622 | -0.13 | N/A | Sites in UTR |
| C6orf225 | NM_001033564 | chromosome 6 open reading frame 225                    | 0 | 0 | 0 | 0 | 2 | 0 | 0 | 2 | hsa-miR-622 | -0.13 | N/A | Sites in UTR |
| SPARC    | NM_003118    | secreted protein, acidic, cysteine-rich (osteonectin)  | 0 | 0 | 0 | 0 | 1 | 1 | 0 | 0 | hsa-miR-622 | -0.13 | N/A | Sites in UTR |
| ZNF714   | NM_182515    | zinc finger protein 714                                | 0 | 0 | 0 | 0 | 2 | 0 | 1 | 1 | hsa-miR-622 | -0.13 | N/A | Sites in UTR |
| C6orf168 | NM_032511    | chromosome 6 open reading frame 168                    | 0 | 0 | 0 | 0 | 3 | 0 | 2 | 1 | hsa-miR-622 | -0.13 | N/A | Sites in UTR |
| ADORA3   | NM_001081976 | adenosine A3 receptor                                  | 0 | 0 | 0 | 0 | 1 | 0 | 0 | 1 | hsa-miR-622 | -0.13 | N/A | Sites in UTR |
| EED      | NM_152991    | embryonic ectoderm development                         | 0 | 0 | 0 | 0 | 1 | 0 | 0 | 1 | hsa-miR-622 | -0.13 | N/A | Sites in UTR |
| POT1     | NM_001042594 | protection of telomeres 1 homolog (S. pombe)           | 0 | 0 | 0 | 0 | 1 | 0 | 0 | 1 | hsa-miR-622 | -0.13 | N/A | Sites in UTR |
| CLDN22   | NM_001111319 | claudin 22                                             | 0 | 0 | 0 | 0 | 1 | 0 | 0 | 1 | hsa-miR-622 | -0.13 | N/A | Sites in UTR |
| PRTFDC1  | NM_020200    | phosphoribosyl transferase domain containing 1         | 0 | 0 | 0 | 0 | 1 | 0 | 0 | 1 | hsa-miR-622 | -0.13 | N/A | Sites in UTR |
| METTL14  | NM_020961    | methyltransferase like 14                              | 0 | 0 | 0 | 0 | 1 | 0 | 0 | 1 | hsa-miR-622 | -0.13 | N/A | Sites in UTR |
| FAM58A   | NM_001130997 | family with sequence similarity 58, member A           | 0 | 0 | 0 | 0 | 1 | 0 | 0 | 1 | hsa-miR-622 | -0.13 | N/A | Sites in UTR |
| MAP3K14  | NM_003954    | mitogen-activated protein kinase kinase kinase 14      | 0 | 0 | 0 | 0 | 1 | 0 | 1 | 0 | hsa-miR-622 | -0.13 | N/A | Sites in UTR |
| CECR1    | NM_017424    | cat eye syndrome chromosome region, candidate 1        | 1 | 0 | 1 | 0 | 0 | 0 | 0 | 0 | hsa-miR-622 | -0.13 | N/A | Sites in UTR |



|          |              |                                                              |   |   |   |   |   |   |   |   |             |       |     |              |
|----------|--------------|--------------------------------------------------------------|---|---|---|---|---|---|---|---|-------------|-------|-----|--------------|
| SLITRK1  | NM_052910    | SLIT and NTRK-like family, member 1                          | 0 | 0 | 0 | 0 | 1 | 0 | 1 | 0 | hsa-miR-622 | -0.13 | N/A | Sites in UTR |
| FAM174B  | NM_207446    | family with sequence similarity 174, member B                | 0 | 0 | 0 | 0 | 1 | 0 | 1 | 0 | hsa-miR-622 | -0.13 | N/A | Sites in UTR |
| VOPP1    | NM_030796    | vesicular, overexpressed in cancer, prosurvival protein 1    | 0 | 0 | 0 | 0 | 2 | 0 | 1 | 1 | hsa-miR-622 | -0.13 | N/A | Sites in UTR |
| PRRC1    | NM_130809    | proline-rich coiled-coil 1                                   | 0 | 0 | 0 | 0 | 2 | 1 | 0 | 1 | hsa-miR-622 | -0.13 | N/A | Sites in UTR |
| PPM1H    | NM_020700    | protein phosphatase, Mg2+/Mn2+ dependent, 1H                 | 0 | 0 | 0 | 0 | 1 | 1 | 0 | 0 | hsa-miR-622 | -0.13 | N/A | Sites in UTR |
| CELF2    | NM_001025076 | CUGBP, Elav-like family member 2                             | 1 | 0 | 0 | 1 | 1 | 0 | 0 | 1 | hsa-miR-622 | -0.13 | N/A | Sites in UTR |
| ZFYVE26  | NM_015346    | zinc finger, FYVE domain containing 26                       | 0 | 0 | 0 | 0 | 1 | 0 | 0 | 1 | hsa-miR-622 | -0.13 | N/A | Sites in UTR |
| ZCCHC4   | NM_024936    | zinc finger, CCHC domain containing 4                        | 0 | 0 | 0 | 0 | 1 | 0 | 0 | 1 | hsa-miR-622 | -0.13 | N/A | Sites in UTR |
| ZNF581   | NM_016535    | zinc finger protein 581                                      | 0 | 0 | 0 | 0 | 1 | 0 | 0 | 1 | hsa-miR-622 | -0.13 | N/A | Sites in UTR |
| FAM171B  | NM_177454    | family with sequence similarity 171, member B                | 1 | 0 | 0 | 1 | 0 | 0 | 0 | 0 | hsa-miR-622 | -0.13 | N/A | Sites in UTR |
| CD68     | NM_001040059 | CD68 molecule                                                | 0 | 0 | 0 | 0 | 1 | 0 | 1 | 0 | hsa-miR-622 | -0.13 | N/A | Sites in UTR |
| SOX11    | NM_003108    | SRY (sex determining region Y)-box 11                        | 1 | 0 | 1 | 0 | 0 | 0 | 0 | 0 | hsa-miR-622 | -0.13 | N/A | Sites in UTR |
| IQSEC1   | NM_001134382 | IQ motif and Sec7 domain 1                                   | 1 | 0 | 1 | 0 | 0 | 0 | 0 | 0 | hsa-miR-622 | -0.13 | N/A | Sites in UTR |
| MYC      | NM_002467    | v-myc myelocytomatosis viral oncogene homolog (avian)        | 0 | 0 | 0 | 0 | 1 | 0 | 0 | 1 | hsa-miR-622 | -0.13 | N/A | Sites in UTR |
| SLC25A27 | NM_004277    | solute carrier family 25, member 27                          | 0 | 0 | 0 | 0 | 1 | 0 | 0 | 1 | hsa-miR-622 | -0.13 | N/A | Sites in UTR |
| TMEM87B  | NM_032824    | transmembrane protein 87B                                    | 0 | 0 | 0 | 0 | 1 | 0 | 0 | 1 | hsa-miR-622 | -0.13 | N/A | Sites in UTR |
| GDNF     | NM_000514    | glial cell derived neurotrophic factor                       | 0 | 0 | 0 | 0 | 1 | 0 | 1 | 0 | hsa-miR-622 | -0.13 | N/A | Sites in UTR |
| GTF2E1   | NM_005513    | general transcription factor IIE, polypeptide 1, alpha 56kDa | 0 | 0 | 0 | 0 | 1 | 0 | 1 | 0 | hsa-miR-622 | -0.13 | N/A | Sites in UTR |

|         |              |                                                         |   |   |   |   |   |   |   |   |             |       |     |              |
|---------|--------------|---------------------------------------------------------|---|---|---|---|---|---|---|---|-------------|-------|-----|--------------|
| RAB23   | NM_016277    | RAB23, member RAS oncogene family                       | 0 | 0 | 0 | 0 | 1 | 0 | 1 | 0 | hsa-miR-622 | -0.13 | N/A | Sites in UTR |
| ZNF548  | NM_001172773 | zinc finger protein 548                                 | 0 | 0 | 0 | 0 | 1 | 0 | 1 | 0 | hsa-miR-622 | -0.13 | N/A | Sites in UTR |
| STIM1   | NM_003156    | stromal interaction molecule 1                          | 0 | 0 | 0 | 0 | 2 | 0 | 2 | 0 | hsa-miR-622 | -0.13 | N/A | Sites in UTR |
| PBX1    | NM_001204961 | pre-B-cell leukemia homeobox 1                          | 1 | 0 | 1 | 0 | 1 | 0 | 0 | 1 | hsa-miR-622 | -0.13 | N/A | Sites in UTR |
| ENAH    | NM_001008493 | enabled homolog (Drosophila)                            | 0 | 0 | 0 | 0 | 3 | 0 | 1 | 2 | hsa-miR-622 | -0.13 | N/A | Sites in UTR |
| AQP4    | NM_001650    | aquaporin 4                                             | 0 | 0 | 0 | 0 | 1 | 0 | 0 | 1 | hsa-miR-622 | -0.13 | N/A | Sites in UTR |
| PTPRG   | NM_002841    | protein tyrosine phosphatase, receptor type, G          | 0 | 0 | 0 | 0 | 1 | 0 | 0 | 1 | hsa-miR-622 | -0.13 | N/A | Sites in UTR |
| RARRES3 | NM_004585    | retinoic acid receptor responder (tazarotene induced) 3 | 0 | 0 | 0 | 0 | 1 | 0 | 0 | 1 | hsa-miR-622 | -0.13 | N/A | Sites in UTR |
| GJA5    | NM_005266    | gap junction protein, alpha 5, 40kDa                    | 0 | 0 | 0 | 0 | 1 | 0 | 1 | 0 | hsa-miR-622 | -0.13 | N/A | Sites in UTR |
| ISL2    | NM_145805    | ISL LIM homeobox 2                                      | 1 | 0 | 1 | 0 | 0 | 0 | 0 | 0 | hsa-miR-622 | -0.13 | N/A | Sites in UTR |
| MICALCL | NM_032867    | MICAL C-terminal like                                   | 0 | 0 | 0 | 0 | 1 | 0 | 1 | 0 | hsa-miR-622 | -0.13 | N/A | Sites in UTR |
| ORMDL3  | NM_139280    | ORM1-like 3 (S. cerevisiae)                             | 0 | 0 | 0 | 0 | 1 | 0 | 1 | 0 | hsa-miR-622 | -0.13 | N/A | Sites in UTR |
| ZNF280B | NM_080764    | zinc finger protein 280B                                | 0 | 0 | 0 | 0 | 1 | 0 | 1 | 0 | hsa-miR-622 | -0.13 | N/A | Sites in UTR |
| NPLOC4  | NM_017921    | nuclear protein localization 4 homolog (S. cerevisiae)  | 0 | 0 | 0 | 0 | 2 | 0 | 2 | 0 | hsa-miR-622 | -0.13 | N/A | Sites in UTR |
| GRIA1   | NM_000827    | glutamate receptor, ionotropic, AMPA 1                  | 0 | 0 | 0 | 0 | 1 | 0 | 0 | 1 | hsa-miR-622 | -0.13 | N/A | Sites in UTR |
| ELOVL4  | NM_022726    | ELOVL fatty acid elongase 4                             | 0 | 0 | 0 | 0 | 1 | 0 | 0 | 1 | hsa-miR-622 | -0.13 | N/A | Sites in UTR |
| ZNF238  | NM_006352    | zinc finger protein 238                                 | 1 | 0 | 0 | 1 | 0 | 0 | 0 | 0 | hsa-miR-622 | -0.13 | N/A | Sites in UTR |
| ZNF750  | NM_024702    | zinc finger protein 750                                 | 0 | 0 | 0 | 0 | 1 | 0 | 0 | 1 | hsa-miR-622 | -0.13 | N/A | Sites in UTR |

|          |              |                                                            |   |   |   |   |   |   |   |   |             |       |     |              |
|----------|--------------|------------------------------------------------------------|---|---|---|---|---|---|---|---|-------------|-------|-----|--------------|
| RWDD4    | NM_152682    | RWD domain containing 4                                    | 0 | 0 | 0 | 0 | 1 | 0 | 0 | 1 | hsa-miR-622 | -0.13 | N/A | Sites in UTR |
| KRT85    | NM_002283    | keratin 85                                                 | 0 | 0 | 0 | 0 | 1 | 0 | 1 | 0 | hsa-miR-622 | -0.13 | N/A | Sites in UTR |
| SIT1     | NM_014450    | signaling threshold regulating transmembrane adaptor 1     | 0 | 0 | 0 | 0 | 1 | 0 | 1 | 0 | hsa-miR-622 | -0.13 | N/A | Sites in UTR |
| ECHDC2   | NM_001198961 | enoyl CoA hydratase domain containing 2                    | 0 | 0 | 0 | 0 | 1 | 0 | 1 | 0 | hsa-miR-622 | -0.13 | N/A | Sites in UTR |
| CHD7     | NM_017780    | chromodomain helicase DNA binding protein 7                | 0 | 0 | 0 | 0 | 1 | 0 | 1 | 0 | hsa-miR-622 | -0.13 | N/A | Sites in UTR |
| CCDC130  | NM_030818    | coiled-coil domain containing 130                          | 0 | 0 | 0 | 0 | 1 | 0 | 1 | 0 | hsa-miR-622 | -0.13 | N/A | Sites in UTR |
| TMEM64   | NM_001008495 | transmembrane protein 64                                   | 0 | 0 | 0 | 0 | 1 | 0 | 1 | 0 | hsa-miR-622 | -0.13 | N/A | Sites in UTR |
| PTPRD    | NM_001040712 | protein tyrosine phosphatase, receptor type, D             | 1 | 0 | 0 | 1 | 0 | 0 | 0 | 0 | hsa-miR-622 | -0.13 | N/A | Sites in UTR |
| KMO      | NM_003679    | kynurenine 3-monooxygenase (kynurenine 3-hydroxylase)      | 0 | 0 | 0 | 0 | 1 | 0 | 0 | 1 | hsa-miR-622 | -0.13 | N/A | Sites in UTR |
| PIWIL2   | NM_001135721 | piwi-like 2 (Drosophila)                                   | 0 | 0 | 0 | 0 | 1 | 0 | 0 | 1 | hsa-miR-622 | -0.13 | N/A | Sites in UTR |
| SLAMF8   | NM_020125    | SLAM family member 8                                       | 0 | 0 | 0 | 0 | 1 | 0 | 0 | 1 | hsa-miR-622 | -0.13 | N/A | Sites in UTR |
| C9orf128 | NM_001012446 | chromosome 9 open reading frame 128                        | 0 | 0 | 0 | 0 | 1 | 0 | 0 | 1 | hsa-miR-622 | -0.13 | N/A | Sites in UTR |
| KIAA0754 | NM_015038    | KIAA0754                                                   | 0 | 0 | 0 | 0 | 1 | 0 | 0 | 1 | hsa-miR-622 | -0.13 | N/A | Sites in UTR |
| 6-Sep    | NM_015129    | septin 6                                                   | 0 | 0 | 0 | 0 | 1 | 0 | 1 | 0 | hsa-miR-622 | -0.13 | N/A | Sites in UTR |
| IFRD1    | NM_001007245 | interferon-related developmental regulator 1               | 0 | 0 | 0 | 0 | 1 | 0 | 0 | 1 | hsa-miR-622 | -0.13 | N/A | Sites in UTR |
| ABHD12   | NM_001042472 | abhydrolase domain containing 12                           | 1 | 0 | 0 | 1 | 0 | 0 | 0 | 0 | hsa-miR-622 | -0.13 | N/A | Sites in UTR |
| MEI5     | NM_001002759 | MEI5 meiotic recombination protein homolog (S. cerevisiae) | 0 | 0 | 0 | 0 | 1 | 0 | 0 | 1 | hsa-miR-622 | -0.13 | N/A | Sites in UTR |
| RASGEF1B | NM_152545    | RasGEF domain family, member 1B                            | 0 | 0 | 0 | 0 | 1 | 0 | 0 | 1 | hsa-miR-622 | -0.13 | N/A | Sites in UTR |

|          |              |                                                               |   |   |   |   |   |   |   |   |             |       |     |              |
|----------|--------------|---------------------------------------------------------------|---|---|---|---|---|---|---|---|-------------|-------|-----|--------------|
| RNF145   | NM_001199380 | ring finger protein 145                                       | 0 | 0 | 0 | 0 | 1 | 0 | 0 | 1 | hsa-miR-622 | -0.13 | N/A | Sites in UTR |
| LUZP2    | NM_001009909 | leucine zipper protein 2                                      | 0 | 0 | 0 | 0 | 1 | 0 | 0 | 1 | hsa-miR-622 | -0.13 | N/A | Sites in UTR |
| C2orf74  | NM_001143959 | chromosome 2 open reading frame 74                            | 0 | 0 | 0 | 0 | 1 | 0 | 0 | 1 | hsa-miR-622 | -0.13 | N/A | Sites in UTR |
| BET1     | NM_005868    | blocked early in transport 1 homolog ( <i>S. cerevisiae</i> ) | 0 | 0 | 0 | 0 | 1 | 0 | 1 | 0 | hsa-miR-622 | -0.13 | N/A | Sites in UTR |
| PNPO     | NM_018129    | pyridoxamine 5'-phosphate oxidase                             | 0 | 0 | 0 | 0 | 1 | 0 | 1 | 0 | hsa-miR-622 | -0.13 | N/A | Sites in UTR |
| SLC26A11 | NM_001166347 | solute carrier family 26, member 11                           | 0 | 0 | 0 | 0 | 1 | 0 | 1 | 0 | hsa-miR-622 | -0.13 | N/A | Sites in UTR |
| PTK6     | NM_005975    | PTK6 protein tyrosine kinase 6                                | 0 | 0 | 0 | 0 | 2 | 0 | 1 | 1 | hsa-miR-622 | -0.13 | N/A | Sites in UTR |
| COL4A4   | NM_000092    | collagen, type IV, alpha 4                                    | 0 | 0 | 0 | 0 | 2 | 0 | 2 | 0 | hsa-miR-622 | -0.13 | N/A | Sites in UTR |
| YEATS2   | NM_018023    | YEATS domain containing 2                                     | 0 | 0 | 0 | 0 | 1 | 1 | 0 | 0 | hsa-miR-622 | -0.13 | N/A | Sites in UTR |
| TRAF3    | NM_001199427 | TNF receptor-associated factor 3                              | 2 | 0 | 1 | 1 | 0 | 0 | 0 | 0 | hsa-miR-622 | -0.13 | N/A | Sites in UTR |
| ALDH1L2  | NM_001034173 | aldehyde dehydrogenase 1 family, member L2                    | 0 | 0 | 0 | 0 | 2 | 0 | 0 | 2 | hsa-miR-622 | -0.13 | N/A | Sites in UTR |
| PHF15    | NM_015288    | PHD finger protein 15                                         | 0 | 0 | 0 | 0 | 2 | 0 | 1 | 1 | hsa-miR-622 | -0.13 | N/A | Sites in UTR |
| GEMIN8   | NM_001042479 | gem (nuclear organelle) associated protein 8                  | 0 | 0 | 0 | 0 | 2 | 0 | 1 | 1 | hsa-miR-622 | -0.13 | N/A | Sites in UTR |
| NACC2    | NM_144653    | NACC family member 2, BEN and BTB (POZ) domain containing     | 0 | 0 | 0 | 0 | 2 | 0 | 2 | 0 | hsa-miR-622 | -0.13 | N/A | Sites in UTR |
| CEBPD    | NM_005195    | CCAAT/enhancer binding protein (C/EBP), delta                 | 0 | 0 | 0 | 0 | 1 | 0 | 0 | 1 | hsa-miR-622 | -0.13 | N/A | Sites in UTR |
| FZD3     | NM_017412    | frizzled family receptor 3                                    | 1 | 0 | 0 | 1 | 0 | 0 | 0 | 0 | hsa-miR-622 | -0.13 | N/A | Sites in UTR |
| NNT      | NM_012343    | nicotinamide nucleotide transhydrogenase                      | 0 | 0 | 0 | 0 | 1 | 0 | 0 | 1 | hsa-miR-622 | -0.13 | N/A | Sites in UTR |
| C17orf80 | NM_001100621 | chromosome 17 open reading frame 80                           | 0 | 0 | 0 | 0 | 1 | 0 | 0 | 1 | hsa-miR-622 | -0.13 | N/A | Sites in UTR |

|          |              |                                                                                |   |   |   |   |   |   |   |   |             |       |     |              |
|----------|--------------|--------------------------------------------------------------------------------|---|---|---|---|---|---|---|---|-------------|-------|-----|--------------|
| ARRDC4   | NM_183376    | arrestin domain containing 4                                                   | 0 | 0 | 0 | 0 | 1 | 0 | 0 | 1 | hsa-miR-622 | -0.13 | N/A | Sites in UTR |
| LRRC32   | NM_001128922 | leucine rich repeat containing 32                                              | 0 | 0 | 0 | 0 | 1 | 0 | 1 | 0 | hsa-miR-622 | -0.13 | N/A | Sites in UTR |
| PCSK6    | NM_002570    | proprotein convertase subtilisin/kexin type 6                                  | 0 | 0 | 0 | 0 | 1 | 0 | 1 | 0 | hsa-miR-622 | -0.13 | N/A | Sites in UTR |
| PCM1     | NM_006197    | pericentriolar material 1                                                      | 1 | 0 | 1 | 0 | 0 | 0 | 0 | 0 | hsa-miR-622 | -0.13 | N/A | Sites in UTR |
| MDC1     | NM_014641    | mediator of DNA-damage checkpoint 1                                            | 0 | 0 | 0 | 0 | 1 | 0 | 1 | 0 | hsa-miR-622 | -0.13 | N/A | Sites in UTR |
| INMT     | NM_001199219 | indolethylamine N-methyltransferase                                            | 0 | 0 | 0 | 0 | 1 | 0 | 1 | 0 | hsa-miR-622 | -0.13 | N/A | Sites in UTR |
| NCEH1    | NM_001146276 | neutral cholesterol ester hydrolase 1                                          | 0 | 0 | 0 | 0 | 1 | 0 | 1 | 0 | hsa-miR-622 | -0.13 | N/A | Sites in UTR |
| SEC16B   | NM_033127    | SEC16 homolog B ( <i>S. cerevisiae</i> )                                       | 0 | 0 | 0 | 0 | 1 | 0 | 1 | 0 | hsa-miR-622 | -0.13 | N/A | Sites in UTR |
| ADAMTS5  | NM_007038    | ADAM metallopeptidase with thrombospondin type 1 motif, 5                      | 0 | 0 | 0 | 0 | 2 | 0 | 0 | 2 | hsa-miR-622 | -0.13 | N/A | Sites in UTR |
| ADM      | NM_001124    | adrenomedullin                                                                 | 0 | 0 | 0 | 0 | 1 | 0 | 0 | 1 | hsa-miR-622 | -0.12 | N/A | Sites in UTR |
| SLC6A2   | NM_001172504 | solute carrier family 6 (neurotransmitter transporter, noradrenalin), member 2 | 0 | 0 | 0 | 0 | 1 | 0 | 0 | 1 | hsa-miR-622 | -0.12 | N/A | Sites in UTR |
| FCF1     | NM_015962    | FCF1 small subunit (SSU) processome component homolog ( <i>S. cerevisiae</i> ) | 0 | 0 | 0 | 0 | 1 | 0 | 0 | 1 | hsa-miR-622 | -0.12 | N/A | Sites in UTR |
| ADPGK    | NM_031284    | ADP-dependent glucokinase                                                      | 0 | 0 | 0 | 0 | 1 | 0 | 0 | 1 | hsa-miR-622 | -0.12 | N/A | Sites in UTR |
| GYPE     | NM_198682    | glycophorin E (MNS blood group)                                                | 0 | 0 | 0 | 0 | 1 | 0 | 1 | 0 | hsa-miR-622 | -0.12 | N/A | Sites in UTR |
| DNALI1   | NM_003462    | dynein, axonemal, light intermediate chain 1                                   | 0 | 0 | 0 | 0 | 1 | 0 | 1 | 0 | hsa-miR-622 | -0.12 | N/A | Sites in UTR |
| SP140    | NM_001005176 | SP140 nuclear body protein                                                     | 0 | 0 | 0 | 0 | 1 | 0 | 1 | 0 | hsa-miR-622 | -0.12 | N/A | Sites in UTR |
| C11orf49 | NM_001003676 | chromosome 11 open reading frame 49                                            | 0 | 0 | 0 | 0 | 1 | 0 | 1 | 0 | hsa-miR-622 | -0.12 | N/A | Sites in UTR |
| FOXP2    | NM_004514    | forkhead box K2                                                                | 0 | 0 | 0 | 0 | 1 | 1 | 0 | 0 | hsa-miR-622 | -0.12 | N/A | Sites in UTR |

|          |              |                                              |   |   |   |   |   |   |   |   |             |       |     |              |
|----------|--------------|----------------------------------------------|---|---|---|---|---|---|---|---|-------------|-------|-----|--------------|
| GIMAP6   | NM_024711    | GTPase, IMAP family member 6                 | 0 | 0 | 0 | 0 | 2 | 0 | 1 | 1 | hsa-miR-622 | -0.12 | N/A | Sites in UTR |
| BMP3     | NM_001201    | bone morphogenetic protein 3                 | 0 | 0 | 0 | 0 | 1 | 0 | 0 | 1 | hsa-miR-622 | -0.12 | N/A | Sites in UTR |
| CYR61    | NM_001554    | cysteine-rich, angiogenic inducer, 61        | 0 | 0 | 0 | 0 | 1 | 0 | 0 | 1 | hsa-miR-622 | -0.12 | N/A | Sites in UTR |
| NTNG1    | NM_001113226 | netrin G1                                    | 0 | 0 | 0 | 0 | 1 | 0 | 0 | 1 | hsa-miR-622 | -0.12 | N/A | Sites in UTR |
| ZC3HAV1  | NM_020119    | zinc finger CCCH-type, antiviral 1           | 0 | 0 | 0 | 0 | 1 | 0 | 0 | 1 | hsa-miR-622 | -0.12 | N/A | Sites in UTR |
| CNGA2    | NM_005140    | cyclic nucleotide gated channel alpha 2      | 0 | 0 | 0 | 0 | 1 | 0 | 1 | 0 | hsa-miR-622 | -0.12 | N/A | Sites in UTR |
| PPIP5K1  | NM_001130858 | diphosphoinositol pentakisphosphate kinase 1 | 1 | 0 | 1 | 0 | 0 | 0 | 0 | 0 | hsa-miR-622 | -0.12 | N/A | Sites in UTR |
| GLIPR1   | NM_006851    | GLI pathogenesis-related 1                   | 0 | 0 | 0 | 0 | 1 | 0 | 1 | 0 | hsa-miR-622 | -0.12 | N/A | Sites in UTR |
| PELI3    | NM_001098510 | pellino homolog 3 (Drosophila)               | 0 | 0 | 0 | 0 | 1 | 0 | 1 | 0 | hsa-miR-622 | -0.12 | N/A | Sites in UTR |
| CCPG1    | NM_004748    | cell cycle progression 1                     | 0 | 0 | 0 | 0 | 2 | 0 | 1 | 1 | hsa-miR-622 | -0.12 | N/A | Sites in UTR |
| RCAN2    | NM_005822    | regulator of calcineurin 2                   | 0 | 0 | 0 | 0 | 2 | 0 | 0 | 2 | hsa-miR-622 | -0.12 | N/A | Sites in UTR |
| SLC35F1  | NM_001029858 | solute carrier family 35, member F1          | 0 | 0 | 0 | 0 | 1 | 1 | 0 | 0 | hsa-miR-622 | -0.12 | N/A | Sites in UTR |
| KPNA1    | NM_002264    | karyopherin alpha 1 (importin alpha 5)       | 0 | 0 | 0 | 0 | 2 | 0 | 1 | 1 | hsa-miR-622 | -0.12 | N/A | Sites in UTR |
| SIM1     | NM_005068    | single-minded homolog 1 (Drosophila)         | 0 | 0 | 0 | 0 | 1 | 0 | 0 | 1 | hsa-miR-622 | -0.12 | N/A | Sites in UTR |
| ZNF638   | NM_001014972 | zinc finger protein 638                      | 0 | 0 | 0 | 0 | 1 | 0 | 0 | 1 | hsa-miR-622 | -0.12 | N/A | Sites in UTR |
| C3orf38  | NM_173824    | chromosome 3 open reading frame 38           | 0 | 0 | 0 | 0 | 1 | 0 | 0 | 1 | hsa-miR-622 | -0.12 | N/A | Sites in UTR |
| ATP9B    | NM_198531    | ATPase, class II, type 9B                    | 0 | 0 | 0 | 0 | 1 | 0 | 0 | 1 | hsa-miR-622 | -0.12 | N/A | Sites in UTR |
| KRTAP5-5 | NM_001001480 | keratin associated protein 5-5               | 0 | 0 | 0 | 0 | 2 | 0 | 1 | 1 | hsa-miR-622 | -0.12 | N/A | Sites in UTR |

|           |              |                                                                          |   |   |   |   |   |   |   |   |             |       |     |              |
|-----------|--------------|--------------------------------------------------------------------------|---|---|---|---|---|---|---|---|-------------|-------|-----|--------------|
| CDK14     | NM_012395    | cyclin-dependent kinase 14                                               | 0 | 0 | 0 | 0 | 1 | 0 | 1 | 0 | hsa-miR-622 | -0.12 | N/A | Sites in UTR |
| TK2       | NM_001172643 | thymidine kinase 2, mitochondrial                                        | 0 | 0 | 0 | 0 | 1 | 0 | 1 | 0 | hsa-miR-622 | -0.12 | N/A | Sites in UTR |
| VCL       | NM_003373    | vinculin                                                                 | 0 | 0 | 0 | 0 | 1 | 0 | 1 | 0 | hsa-miR-622 | -0.12 | N/A | Sites in UTR |
| TNFRSF10B | NM_003842    | tumor necrosis factor receptor superfamily, member 10b                   | 0 | 0 | 0 | 0 | 1 | 0 | 1 | 0 | hsa-miR-622 | -0.12 | N/A | Sites in UTR |
| SUPT7L    | NM_014860    | suppressor of Ty 7 (S. cerevisiae)-like                                  | 0 | 0 | 0 | 0 | 1 | 0 | 1 | 0 | hsa-miR-622 | -0.12 | N/A | Sites in UTR |
| PITPNM2   | NM_020845    | phosphatidylinositol transfer protein, membrane-associated 2             | 0 | 0 | 0 | 0 | 1 | 0 | 1 | 0 | hsa-miR-622 | -0.12 | N/A | Sites in UTR |
| GRID2IP   | NM_001145118 | glutamate receptor, ionotropic, delta 2 (Grid2) interacting protein      | 1 | 0 | 1 | 0 | 0 | 0 | 0 | 0 | hsa-miR-622 | -0.12 | N/A | Sites in UTR |
| CSorf63   | NM_001164479 | chromosome 5 open reading frame 63                                       | 0 | 0 | 0 | 0 | 1 | 0 | 1 | 0 | hsa-miR-622 | -0.12 | N/A | Sites in UTR |
| EIF2S3    | NM_001415    | eukaryotic translation initiation factor 2, subunit 3 gamma, 52kDa       | 0 | 0 | 0 | 0 | 1 | 0 | 0 | 1 | hsa-miR-622 | -0.12 | N/A | Sites in UTR |
| GNS       | NM_002076    | glucosamine (N-acetyl)-6-sulfatase                                       | 0 | 0 | 0 | 0 | 1 | 0 | 0 | 1 | hsa-miR-622 | -0.12 | N/A | Sites in UTR |
| NCK1      | NM_001190796 | NCK adaptor protein 1                                                    | 1 | 0 | 0 | 1 | 0 | 0 | 0 | 0 | hsa-miR-622 | -0.12 | N/A | Sites in UTR |
| ZNF37A    | NM_001007094 | zinc finger protein 37A                                                  | 0 | 0 | 0 | 0 | 1 | 0 | 0 | 1 | hsa-miR-622 | -0.12 | N/A | Sites in UTR |
| CILP      | NM_003613    | cartilage intermediate layer protein, nucleotide pyrophosphohydrolase    | 0 | 0 | 0 | 0 | 1 | 0 | 0 | 1 | hsa-miR-622 | -0.12 | N/A | Sites in UTR |
| MAP7D1    | NM_018067    | MAP7 domain containing 1                                                 | 0 | 0 | 0 | 0 | 1 | 0 | 0 | 1 | hsa-miR-622 | -0.12 | N/A | Sites in UTR |
| HACE1     | NM_020771    | HECT domain and ankyrin repeat containing, E3 ubiquitin protein ligase 1 | 0 | 0 | 0 | 0 | 1 | 0 | 0 | 1 | hsa-miR-622 | -0.12 | N/A | Sites in UTR |
| SLC15A4   | NM_145648    | solute carrier family 15, member 4                                       | 0 | 0 | 0 | 0 | 1 | 0 | 0 | 1 | hsa-miR-622 | -0.12 | N/A | Sites in UTR |
| KCNK2     | NM_001017424 | potassium channel, subfamily K, member 2                                 | 1 | 0 | 1 | 0 | 0 | 0 | 0 | 0 | hsa-miR-622 | -0.12 | N/A | Sites in UTR |
| ANGPTL2   | NM_012098    | angiopoietin-like 2                                                      | 0 | 0 | 0 | 0 | 1 | 0 | 1 | 0 | hsa-miR-622 | -0.12 | N/A | Sites in UTR |

|          |              |                                                                       |   |   |   |   |   |   |   |   |             |       |     |              |
|----------|--------------|-----------------------------------------------------------------------|---|---|---|---|---|---|---|---|-------------|-------|-----|--------------|
| SMUG1    | NM_014311    | single-strand-selective monofunctional uracil-DNA glycosylase 1       | 0 | 0 | 0 | 0 | 1 | 0 | 1 | 0 | hsa-miR-622 | -0.12 | N/A | Sites in UTR |
| PARS2    | NM_152268    | prolyl-tRNA synthetase 2, mitochondrial (putative)                    | 0 | 0 | 0 | 0 | 1 | 0 | 1 | 0 | hsa-miR-622 | -0.12 | N/A | Sites in UTR |
| ZFAND3   | NM_021943    | zinc finger, AN1-type domain 3                                        | 0 | 0 | 0 | 0 | 1 | 0 | 1 | 0 | hsa-miR-622 | -0.12 | N/A | Sites in UTR |
| FAM160B2 | NM_022749    | family with sequence similarity 160, member B2                        | 0 | 0 | 0 | 0 | 1 | 0 | 1 | 0 | hsa-miR-622 | -0.12 | N/A | Sites in UTR |
| DOK3     | NM_001144875 | docking protein 3                                                     | 0 | 0 | 0 | 0 | 1 | 0 | 1 | 0 | hsa-miR-622 | -0.12 | N/A | Sites in UTR |
| PDIA3    | NM_005313    | protein disulfide isomerase family A, member 3                        | 0 | 0 | 0 | 0 | 2 | 0 | 0 | 2 | hsa-miR-622 | -0.12 | N/A | Sites in UTR |
| SSH1     | NM_018984    | slingshot homolog 1 (Drosophila)                                      | 0 | 0 | 0 | 0 | 2 | 0 | 1 | 1 | hsa-miR-622 | -0.12 | N/A | Sites in UTR |
| CEACAM5  | NM_004363    | carcinoembryonic antigen-related cell adhesion molecule 5             | 0 | 0 | 0 | 0 | 1 | 0 | 0 | 1 | hsa-miR-622 | -0.12 | N/A | Sites in UTR |
| CHRNA5   | NM_000745    | cholinergic receptor, nicotinic, alpha 5                              | 0 | 0 | 0 | 0 | 1 | 0 | 0 | 1 | hsa-miR-622 | -0.12 | N/A | Sites in UTR |
| RTN1     | NM_021136    | reticulon 1                                                           | 0 | 0 | 0 | 0 | 1 | 0 | 0 | 1 | hsa-miR-622 | -0.12 | N/A | Sites in UTR |
| SDHD     | NM_003002    | succinate dehydrogenase complex, subunit D, integral membrane protein | 0 | 0 | 0 | 0 | 1 | 0 | 0 | 1 | hsa-miR-622 | -0.12 | N/A | Sites in UTR |
| UBP1     | NM_001128160 | upstream binding protein 1 (LBP-1a)                                   | 1 | 0 | 0 | 1 | 1 | 0 | 0 | 1 | hsa-miR-622 | -0.12 | N/A | Sites in UTR |
| MAPRE1   | NM_012325    | microtubule-associated protein, RP/EB family, member 1                | 0 | 0 | 0 | 0 | 1 | 0 | 0 | 1 | hsa-miR-622 | -0.12 | N/A | Sites in UTR |
| MUC13    | NM_033049    | mucin 13, cell surface associated                                     | 0 | 0 | 0 | 0 | 1 | 0 | 0 | 1 | hsa-miR-622 | -0.12 | N/A | Sites in UTR |
| IL31RA   | NM_001242637 | interleukin 31 receptor A                                             | 0 | 0 | 0 | 0 | 1 | 0 | 0 | 1 | hsa-miR-622 | -0.12 | N/A | Sites in UTR |
| CRKL     | NM_005207    | v-crk sarcoma virus CT10 oncogene homolog (avian)-like                | 0 | 0 | 0 | 0 | 1 | 0 | 1 | 0 | hsa-miR-622 | -0.12 | N/A | Sites in UTR |
| GPR17    | NM_001161415 | G protein-coupled receptor 17                                         | 0 | 0 | 0 | 0 | 1 | 0 | 1 | 0 | hsa-miR-622 | -0.12 | N/A | Sites in UTR |
| WNT9B    | NM_003396    | wingless-type MMTV integration site family, member 9B                 | 0 | 0 | 0 | 0 | 1 | 0 | 1 | 0 | hsa-miR-622 | -0.12 | N/A | Sites in UTR |



|             |              |                                                                                             |   |   |   |   |   |   |   |   |             |       |     |              |
|-------------|--------------|---------------------------------------------------------------------------------------------|---|---|---|---|---|---|---|---|-------------|-------|-----|--------------|
| OBSL1       | NM_001173408 | obscurin-like 1                                                                             | 0 | 0 | 0 | 0 | 1 | 0 | 1 | 0 | hsa-miR-622 | -0.12 | N/A | Sites in UTR |
| UBAP2       | NM_018449    | ubiquitin associated protein 2                                                              | 0 | 0 | 0 | 0 | 1 | 0 | 1 | 0 | hsa-miR-622 | -0.12 | N/A | Sites in UTR |
| PDZD4       | NM_032512    | PDZ domain containing 4                                                                     | 0 | 0 | 0 | 0 | 1 | 0 | 1 | 0 | hsa-miR-622 | -0.12 | N/A | Sites in UTR |
| LINGO1      | NM_032808    | leucine rich repeat and Ig domain containing 1                                              | 1 | 0 | 1 | 0 | 0 | 0 | 0 | 0 | hsa-miR-622 | -0.12 | N/A | Sites in UTR |
| C15orf55    | NM_175741    | chromosome 15 open reading frame 55                                                         | 0 | 0 | 0 | 0 | 1 | 0 | 1 | 0 | hsa-miR-622 | -0.12 | N/A | Sites in UTR |
| AGMO        | NM_001004320 | alkylglycerol monooxygenase                                                                 | 0 | 0 | 0 | 0 | 1 | 0 | 1 | 0 | hsa-miR-622 | -0.12 | N/A | Sites in UTR |
| SLC7A11     | NM_014331    | solute carrier family 7 (anionic amino acid transporter light chain, xc- system), member 11 | 0 | 0 | 0 | 0 | 2 | 0 | 0 | 2 | hsa-miR-622 | -0.12 | N/A | Sites in UTR |
| GPR85       | NM_001146265 | G protein-coupled receptor 85                                                               | 0 | 0 | 0 | 0 | 2 | 0 | 1 | 1 | hsa-miR-622 | -0.12 | N/A | Sites in UTR |
| ST14        | NM_021978    | suppression of tumorigenicity 14 (colon carcinoma)                                          | 0 | 0 | 0 | 0 | 1 | 0 | 0 | 1 | hsa-miR-622 | -0.12 | N/A | Sites in UTR |
| TNFSF9      | NM_003811    | tumor necrosis factor (ligand) superfamily, member 9                                        | 0 | 0 | 0 | 0 | 1 | 0 | 0 | 1 | hsa-miR-622 | -0.12 | N/A | Sites in UTR |
| CDKL2       | NM_003948    | cyclin-dependent kinase-like 2 (CDC2-related kinase)                                        | 0 | 0 | 0 | 0 | 1 | 0 | 0 | 1 | hsa-miR-622 | -0.12 | N/A | Sites in UTR |
| NUDT3       | NM_006703    | nudix (nucleoside diphosphate linked moiety X)-type motif 3                                 | 1 | 0 | 0 | 1 | 0 | 0 | 0 | 0 | hsa-miR-622 | -0.12 | N/A | Sites in UTR |
| HSD17B12    | NM_016142    | hydroxysteroid (17-beta) dehydrogenase 12                                                   | 0 | 0 | 0 | 0 | 1 | 0 | 0 | 1 | hsa-miR-622 | -0.12 | N/A | Sites in UTR |
| C4orf41     | NM_021942    | chromosome 4 open reading frame 41                                                          | 0 | 0 | 0 | 0 | 1 | 0 | 0 | 1 | hsa-miR-622 | -0.12 | N/A | Sites in UTR |
| GRIP2       | NM_001080423 | glutamate receptor interacting protein 2                                                    | 1 | 0 | 0 | 1 | 0 | 0 | 0 | 0 | hsa-miR-622 | -0.12 | N/A | Sites in UTR |
| RPS10-NUDT3 | NM_001202470 | RPS10-NUDT3 readthrough                                                                     | 1 | 0 | 0 | 1 | 0 | 0 | 0 | 0 | hsa-miR-622 | -0.12 | N/A | Sites in UTR |
| BCR         | NM_004327    | breakpoint cluster region                                                                   | 1 | 0 | 1 | 0 | 0 | 0 | 0 | 0 | hsa-miR-622 | -0.12 | N/A | Sites in UTR |
| AUTS2       | NM_001127231 | autism susceptibility candidate 2                                                           | 0 | 0 | 0 | 0 | 1 | 0 | 1 | 0 | hsa-miR-622 | -0.12 | N/A | Sites in UTR |

|          |              |                                                                                         |   |   |   |   |   |   |   |   |             |       |     |              |
|----------|--------------|-----------------------------------------------------------------------------------------|---|---|---|---|---|---|---|---|-------------|-------|-----|--------------|
| KRT76    | NM_015848    | keratin 76                                                                              | 0 | 0 | 0 | 0 | 1 | 0 | 1 | 0 | hsa-miR-622 | -0.12 | N/A | Sites in UTR |
| SYK      | NM_001135052 | spleen tyrosine kinase                                                                  | 0 | 0 | 0 | 0 | 2 | 0 | 1 | 1 | hsa-miR-622 | -0.12 | N/A | Sites in UTR |
| S100PBP  | NM_022753    | S100P binding protein                                                                   | 0 | 0 | 0 | 0 | 2 | 0 | 1 | 1 | hsa-miR-622 | -0.12 | N/A | Sites in UTR |
| ZNF696   | NM_030895    | zinc finger protein 696                                                                 | 0 | 0 | 0 | 0 | 2 | 0 | 1 | 1 | hsa-miR-622 | -0.12 | N/A | Sites in UTR |
| C1orf88  | NM_181643    | chromosome 1 open reading frame 88                                                      | 0 | 0 | 0 | 0 | 1 | 1 | 0 | 0 | hsa-miR-622 | -0.12 | N/A | Sites in UTR |
| PLA2G5   | NM_000929    | phospholipase A2, group V                                                               | 0 | 0 | 0 | 0 | 1 | 0 | 0 | 1 | hsa-miR-622 | -0.12 | N/A | Sites in UTR |
| SLC25A16 | NM_152707    | solute carrier family 25 (mitochondrial carrier; Graves disease autoantigen), member 16 | 0 | 0 | 0 | 0 | 1 | 0 | 0 | 1 | hsa-miR-622 | -0.12 | N/A | Sites in UTR |
| FOSL1    | NM_005438    | FOS-like antigen 1                                                                      | 0 | 0 | 0 | 0 | 1 | 0 | 0 | 1 | hsa-miR-622 | -0.12 | N/A | Sites in UTR |
| ARPP19   | NM_006628    | cAMP-regulated phosphoprotein, 19kDa                                                    | 1 | 0 | 0 | 1 | 0 | 0 | 0 | 0 | hsa-miR-622 | -0.12 | N/A | Sites in UTR |
| MEAF6    | NM_022756    | MYST/Esa1-associated factor 6                                                           | 0 | 0 | 0 | 0 | 1 | 0 | 0 | 1 | hsa-miR-622 | -0.12 | N/A | Sites in UTR |
| AHSA2    | NM_152392    | AHA1, activator of heat shock 90kDa protein ATPase homolog 2 (yeast)                    | 0 | 0 | 0 | 0 | 1 | 0 | 0 | 1 | hsa-miR-622 | -0.12 | N/A | Sites in UTR |
| C10orf71 | NM_001135196 | chromosome 10 open reading frame 71                                                     | 0 | 0 | 0 | 0 | 1 | 0 | 1 | 0 | hsa-miR-622 | -0.12 | N/A | Sites in UTR |
| KRT74    | NM_175053    | keratin 74                                                                              | 0 | 0 | 0 | 0 | 1 | 0 | 1 | 0 | hsa-miR-622 | -0.12 | N/A | Sites in UTR |
| TMEM215  | NM_212558    | transmembrane protein 215                                                               | 0 | 0 | 0 | 0 | 1 | 0 | 1 | 0 | hsa-miR-622 | -0.12 | N/A | Sites in UTR |
| USH1G    | NM_173477    | Usher syndrome 1G (autosomal recessive)                                                 | 0 | 0 | 0 | 0 | 1 | 1 | 0 | 0 | hsa-miR-622 | -0.12 | N/A | Sites in UTR |
| C18orf1  | NM_001003674 | chromosome 18 open reading frame 1                                                      | 0 | 0 | 0 | 0 | 1 | 0 | 0 | 1 | hsa-miR-622 | -0.12 | N/A | Sites in UTR |
| NRP2     | NM_201264    | neuropilin 2                                                                            | 0 | 0 | 0 | 0 | 1 | 0 | 0 | 1 | hsa-miR-622 | -0.12 | N/A | Sites in UTR |
| ILVBL    | NM_006844    | ilvB (bacterial acetolactate synthase)-like                                             | 0 | 0 | 0 | 0 | 1 | 0 | 0 | 1 | hsa-miR-622 | -0.12 | N/A | Sites in UTR |

|          |              |                                                                                  |   |   |   |   |   |   |   |   |             |       |     |              |
|----------|--------------|----------------------------------------------------------------------------------|---|---|---|---|---|---|---|---|-------------|-------|-----|--------------|
| LTN1     | NM_015565    | listerin E3 ubiquitin protein ligase 1                                           | 0 | 0 | 0 | 0 | 1 | 0 | 0 | 1 | hsa-miR-622 | -0.12 | N/A | Sites in UTR |
| KIAA1797 | NM_017794    | KIAA1797                                                                         | 0 | 0 | 0 | 0 | 1 | 0 | 0 | 1 | hsa-miR-622 | -0.12 | N/A | Sites in UTR |
| HEMGN    | NM_018437    | hemogen                                                                          | 0 | 0 | 0 | 0 | 1 | 0 | 0 | 1 | hsa-miR-622 | -0.12 | N/A | Sites in UTR |
| AMAC1    | NM_152462    | acyl-malonyl condensing enzyme 1                                                 | 0 | 0 | 0 | 0 | 1 | 0 | 0 | 1 | hsa-miR-622 | -0.12 | N/A | Sites in UTR |
| COMT     | NM_000754    | catechol-O-methyltransferase                                                     | 0 | 0 | 0 | 0 | 1 | 0 | 1 | 0 | hsa-miR-622 | -0.12 | N/A | Sites in UTR |
| CYP4A11  | NM_000778    | cytochrome P450, family 4, subfamily A, polypeptide 11                           | 0 | 0 | 0 | 0 | 1 | 0 | 1 | 0 | hsa-miR-622 | -0.12 | N/A | Sites in UTR |
| C9orf7   | NM_001135775 | chromosome 9 open reading frame 7                                                | 0 | 0 | 0 | 0 | 1 | 0 | 1 | 0 | hsa-miR-622 | -0.12 | N/A | Sites in UTR |
| BVES     | NM_001199563 | blood vessel epicardial substance                                                | 1 | 0 | 1 | 0 | 0 | 0 | 0 | 0 | hsa-miR-622 | -0.12 | N/A | Sites in UTR |
| KLHL3    | NM_017415    | kelch-like 3 (Drosophila)                                                        | 0 | 0 | 0 | 0 | 1 | 0 | 1 | 0 | hsa-miR-622 | -0.12 | N/A | Sites in UTR |
| C16orf5  | NM_001199054 | chromosome 16 open reading frame 5                                               | 0 | 0 | 0 | 0 | 1 | 0 | 1 | 0 | hsa-miR-622 | -0.12 | N/A | Sites in UTR |
| C10orf67 | NM_153714    | chromosome 10 open reading frame 67                                              | 0 | 0 | 0 | 0 | 1 | 0 | 1 | 0 | hsa-miR-622 | -0.12 | N/A | Sites in UTR |
| CISD3    | NM_001136498 | CDGSH iron sulfur domain 3                                                       | 0 | 0 | 0 | 0 | 1 | 0 | 1 | 0 | hsa-miR-622 | -0.12 | N/A | Sites in UTR |
| FNBP1    | NM_015033    | formin binding protein 1                                                         | 0 | 0 | 0 | 0 | 2 | 0 | 2 | 0 | hsa-miR-622 | -0.12 | N/A | Sites in UTR |
| FNDC3A   | NM_001079673 | fibronectin type III domain containing 3A                                        | 0 | 0 | 0 | 0 | 1 | 1 | 0 | 0 | hsa-miR-622 | -0.12 | N/A | Sites in UTR |
| PRKD3    | NM_005813    | protein kinase D3                                                                | 0 | 0 | 0 | 0 | 1 | 1 | 0 | 0 | hsa-miR-622 | -0.12 | N/A | Sites in UTR |
| TSSK1B   | NM_032028    | testis-specific serine kinase 1B                                                 | 0 | 0 | 0 | 0 | 1 | 1 | 0 | 0 | hsa-miR-622 | -0.12 | N/A | Sites in UTR |
| MEIS1    | NM_002398    | Meis homeobox 1                                                                  | 0 | 0 | 0 | 0 | 1 | 0 | 0 | 1 | hsa-miR-622 | -0.12 | N/A | Sites in UTR |
| TAF4     | NM_003185    | TAF4 RNA polymerase II, TATA box binding protein (TBP)-associated factor, 135kDa | 0 | 0 | 0 | 0 | 1 | 0 | 0 | 1 | hsa-miR-622 | -0.12 | N/A | Sites in UTR |

|          |              |                                                                        |   |   |   |   |   |   |   |   |             |       |     |              |
|----------|--------------|------------------------------------------------------------------------|---|---|---|---|---|---|---|---|-------------|-------|-----|--------------|
| CEP68    | NM_015147    | centrosomal protein 68kDa                                              | 0 | 0 | 0 | 0 | 1 | 0 | 0 | 1 | hsa-miR-622 | -0.12 | N/A | Sites in UTR |
| MTHFD1L  | NM_001242767 | methylenetetrahydrofolate dehydrogenase (NADP+ dependent) 1-like       | 0 | 0 | 0 | 0 | 1 | 0 | 0 | 1 | hsa-miR-622 | -0.12 | N/A | Sites in UTR |
| SUV39H2  | NM_001193424 | suppressor of variegation 3-9 homolog 2 (Drosophila)                   | 0 | 0 | 0 | 0 | 1 | 0 | 0 | 1 | hsa-miR-622 | -0.12 | N/A | Sites in UTR |
| FAM198A  | NM_001129908 | family with sequence similarity 198, member A                          | 0 | 0 | 0 | 0 | 1 | 0 | 0 | 1 | hsa-miR-622 | -0.12 | N/A | Sites in UTR |
| HLA-DPB1 | NM_002121    | major histocompatibility complex, class II, DP beta 1                  | 0 | 0 | 0 | 0 | 1 | 0 | 1 | 0 | hsa-miR-622 | -0.12 | N/A | Sites in UTR |
| XK       | NM_021083    | X-linked Kx blood group (McLeod syndrome)                              | 0 | 0 | 0 | 0 | 1 | 0 | 1 | 0 | hsa-miR-622 | -0.12 | N/A | Sites in UTR |
| NRXN2    | NM_015080    | neurexin 2                                                             | 0 | 0 | 0 | 0 | 1 | 0 | 1 | 0 | hsa-miR-622 | -0.12 | N/A | Sites in UTR |
| ATP6V0A2 | NM_012463    | ATPase, H+ transporting, lysosomal V0 subunit a2                       | 0 | 0 | 0 | 0 | 1 | 0 | 1 | 0 | hsa-miR-622 | -0.12 | N/A | Sites in UTR |
| MPHOSPH8 | NM_017520    | M-phase phosphoprotein 8                                               | 1 | 0 | 1 | 0 | 0 | 0 | 0 | 0 | hsa-miR-622 | -0.12 | N/A | Sites in UTR |
| SPINLW1  | NM_020398    | serine peptidase inhibitor-like, with Kunitz and WAP domains 1 (eppin) | 0 | 0 | 0 | 0 | 1 | 0 | 1 | 0 | hsa-miR-622 | -0.12 | N/A | Sites in UTR |
| BRIP1    | NM_032043    | BRCA1 interacting protein C-terminal helicase 1                        | 0 | 0 | 0 | 0 | 2 | 1 | 0 | 1 | hsa-miR-622 | -0.12 | N/A | Sites in UTR |
| DDO      | NM_003649    | D-aspartate oxidase                                                    | 0 | 0 | 0 | 0 | 1 | 0 | 0 | 1 | hsa-miR-622 | -0.12 | N/A | Sites in UTR |
| KIAA1147 | NM_001080392 | KIAA1147                                                               | 0 | 0 | 0 | 0 | 1 | 0 | 0 | 1 | hsa-miR-622 | -0.12 | N/A | Sites in UTR |
| C10orf58 | NM_032333    | chromosome 10 open reading frame 58                                    | 1 | 0 | 0 | 1 | 0 | 0 | 0 | 0 | hsa-miR-622 | -0.12 | N/A | Sites in UTR |
| DPY19L4  | NM_181787    | dpy-19-like 4 (C. elegans)                                             | 0 | 0 | 0 | 0 | 1 | 0 | 0 | 1 | hsa-miR-622 | -0.12 | N/A | Sites in UTR |
| PTTG1IP  | NM_004339    | pituitary tumor-transforming 1 interacting protein                     | 0 | 0 | 0 | 0 | 1 | 0 | 1 | 0 | hsa-miR-622 | -0.12 | N/A | Sites in UTR |
| PRIM2    | NM_000947    | primase, DNA, polypeptide 2 (58kDa)                                    | 0 | 0 | 0 | 0 | 1 | 0 | 1 | 0 | hsa-miR-622 | -0.12 | N/A | Sites in UTR |
| AKAP8    | NM_005858    | A kinase (PRKA) anchor protein 8                                       | 0 | 0 | 0 | 0 | 1 | 0 | 1 | 0 | hsa-miR-622 | -0.12 | N/A | Sites in UTR |

|         |              |                                                                                |   |   |   |   |   |   |   |   |             |       |     |              |
|---------|--------------|--------------------------------------------------------------------------------|---|---|---|---|---|---|---|---|-------------|-------|-----|--------------|
| GCN1L1  | NM_006836    | GCN1 general control of amino-acid synthesis 1-like 1 (yeast)                  | 0 | 0 | 0 | 0 | 1 | 0 | 1 | 0 | hsa-miR-622 | -0.12 | N/A | Sites in UTR |
| ZMYND8  | NM_012408    | zinc finger, MYND-type containing 8                                            | 0 | 0 | 0 | 0 | 1 | 0 | 1 | 0 | hsa-miR-622 | -0.12 | N/A | Sites in UTR |
| RHCG    | NM_016321    | Rh family, C glycoprotein                                                      | 0 | 0 | 0 | 0 | 1 | 0 | 1 | 0 | hsa-miR-622 | -0.12 | N/A | Sites in UTR |
| KTI12   | NM_138417    | KTI12 homolog, chromatin associated ( <i>S. cerevisiae</i> )                   | 0 | 0 | 0 | 0 | 1 | 0 | 1 | 0 | hsa-miR-622 | -0.12 | N/A | Sites in UTR |
| LHFPL2  | NM_005779    | lipoma HMGIC fusion partner-like 2                                             | 0 | 0 | 0 | 0 | 1 | 1 | 0 | 0 | hsa-miR-622 | -0.12 | N/A | Sites in UTR |
| SESN2   | NM_031459    | sestrin 2                                                                      | 0 | 0 | 0 | 0 | 1 | 1 | 0 | 0 | hsa-miR-622 | -0.12 | N/A | Sites in UTR |
| MACC1   | NM_182762    | metastasis associated in colon cancer 1                                        | 0 | 0 | 0 | 0 | 4 | 0 | 3 | 1 | hsa-miR-622 | -0.12 | N/A | Sites in UTR |
| MAP3K4  | NM_005922    | mitogen-activated protein kinase kinase kinase 4                               | 0 | 0 | 0 | 0 | 1 | 0 | 0 | 1 | hsa-miR-622 | -0.12 | N/A | Sites in UTR |
| SLC20A1 | NM_005415    | solute carrier family 20 (phosphate transporter), member 1                     | 0 | 0 | 0 | 0 | 1 | 0 | 0 | 1 | hsa-miR-622 | -0.12 | N/A | Sites in UTR |
| AKAP12  | NM_005100    | A kinase (PRKA) anchor protein 12                                              | 0 | 0 | 0 | 0 | 1 | 0 | 0 | 1 | hsa-miR-622 | -0.12 | N/A | Sites in UTR |
| YAF2    | NM_001190977 | YY1 associated factor 2                                                        | 0 | 0 | 0 | 0 | 1 | 0 | 0 | 1 | hsa-miR-622 | -0.12 | N/A | Sites in UTR |
| ARL2BP  | NM_012106    | ADP-ribosylation factor-like 2 binding protein                                 | 0 | 0 | 0 | 0 | 1 | 0 | 0 | 1 | hsa-miR-622 | -0.12 | N/A | Sites in UTR |
| DAK     | NM_015533    | dihydroxyacetone kinase 2 homolog ( <i>S. cerevisiae</i> )                     | 0 | 0 | 0 | 0 | 1 | 0 | 0 | 1 | hsa-miR-622 | -0.12 | N/A | Sites in UTR |
| SLC2A8  | NM_014580    | solute carrier family 2 (facilitated glucose transporter), member 8            | 0 | 0 | 0 | 0 | 1 | 0 | 0 | 1 | hsa-miR-622 | -0.12 | N/A | Sites in UTR |
| ENOSF1  | NM_001126123 | enolase superfamily member 1                                                   | 0 | 0 | 0 | 0 | 1 | 0 | 0 | 1 | hsa-miR-622 | -0.12 | N/A | Sites in UTR |
| RFTN2   | NM_144629    | raftlin family member 2                                                        | 0 | 0 | 0 | 0 | 1 | 0 | 0 | 1 | hsa-miR-622 | -0.12 | N/A | Sites in UTR |
| AMAC1L3 | NM_001102614 | acyl-malonyl condensing enzyme 1-like 3                                        | 0 | 0 | 0 | 0 | 1 | 0 | 0 | 1 | hsa-miR-622 | -0.12 | N/A | Sites in UTR |
| POP4    | NM_006627    | processing of precursor 4, ribonuclease P/MRP subunit ( <i>S. cerevisiae</i> ) | 0 | 0 | 0 | 0 | 1 | 0 | 1 | 0 | hsa-miR-622 | -0.12 | N/A | Sites in UTR |

|          |              |                                                                        |   |   |   |   |   |   |   |   |             |       |     |              |
|----------|--------------|------------------------------------------------------------------------|---|---|---|---|---|---|---|---|-------------|-------|-----|--------------|
| CDR2L    | NM_014603    | cerebellar degeneration-related protein 2-like                         | 0 | 0 | 0 | 0 | 1 | 0 | 1 | 0 | hsa-miR-622 | -0.12 | N/A | Sites in UTR |
| CHST15   | NM_015892    | carbohydrate (N-acetylgalactosamine 4-sulfate 6-O) sulfotransferase 15 | 0 | 0 | 0 | 0 | 1 | 0 | 1 | 0 | hsa-miR-622 | -0.12 | N/A | Sites in UTR |
| RUFY2    | NM_001042417 | RUN and FYVE domain containing 2                                       | 0 | 0 | 0 | 0 | 1 | 0 | 1 | 0 | hsa-miR-622 | -0.12 | N/A | Sites in UTR |
| NCKAP5L  | NM_001037806 | NCK-associated protein 5-like                                          | 0 | 0 | 0 | 0 | 1 | 0 | 1 | 0 | hsa-miR-622 | -0.12 | N/A | Sites in UTR |
| C9orf116 | NM_001048265 | chromosome 9 open reading frame 116                                    | 0 | 0 | 0 | 0 | 1 | 0 | 1 | 0 | hsa-miR-622 | -0.12 | N/A | Sites in UTR |
| FAM127C  | NM_001078173 | family with sequence similarity 127, member C                          | 0 | 0 | 0 | 0 | 1 | 0 | 1 | 0 | hsa-miR-622 | -0.12 | N/A | Sites in UTR |
| ERBB4    | NM_001042599 | v-erb-a erythroblastic leukemia viral oncogene homolog 4 (avian)       | 0 | 0 | 0 | 0 | 1 | 0 | 0 | 1 | hsa-miR-622 | -0.11 | N/A | Sites in UTR |
| FLNB     | NM_001164317 | filamin B, beta                                                        | 0 | 0 | 0 | 0 | 1 | 0 | 0 | 1 | hsa-miR-622 | -0.11 | N/A | Sites in UTR |
| PPM1G    | NM_177983    | protein phosphatase, Mg2+/Mn2+ dependent, 1G                           | 0 | 0 | 0 | 0 | 1 | 0 | 0 | 1 | hsa-miR-622 | -0.11 | N/A | Sites in UTR |
| UCP3     | NM_022803    | uncoupling protein 3 (mitochondrial, proton carrier)                   | 0 | 0 | 0 | 0 | 1 | 0 | 0 | 1 | hsa-miR-622 | -0.11 | N/A | Sites in UTR |
| VLDLR    | NM_001018056 | very low density lipoprotein receptor                                  | 0 | 0 | 0 | 0 | 1 | 0 | 0 | 1 | hsa-miR-622 | -0.11 | N/A | Sites in UTR |
| GEMIN5   | NM_015465    | gem (nuclear organelle) associated protein 5                           | 0 | 0 | 0 | 0 | 1 | 0 | 0 | 1 | hsa-miR-622 | -0.11 | N/A | Sites in UTR |
| DHRS7B   | NM_015510    | dehydrogenase/reductase (SDR family) member 7B                         | 0 | 0 | 0 | 0 | 1 | 0 | 0 | 1 | hsa-miR-622 | -0.11 | N/A | Sites in UTR |
| DISC1    | NM_001012957 | disrupted in schizophrenia 1                                           | 0 | 0 | 0 | 0 | 1 | 0 | 0 | 1 | hsa-miR-622 | -0.11 | N/A | Sites in UTR |
| LGSN     | NM_001143940 | lengsin, lens protein with glutamine synthetase domain                 | 0 | 0 | 0 | 0 | 1 | 0 | 0 | 1 | hsa-miR-622 | -0.11 | N/A | Sites in UTR |
| VPS33A   | NM_022916    | vacuolar protein sorting 33 homolog A (S. cerevisiae)                  | 0 | 0 | 0 | 0 | 1 | 0 | 0 | 1 | hsa-miR-622 | -0.11 | N/A | Sites in UTR |
| TXNRD3   | NM_001173513 | thioredoxin reductase 3                                                | 0 | 0 | 0 | 0 | 1 | 0 | 0 | 1 | hsa-miR-622 | -0.11 | N/A | Sites in UTR |
| VGLL2    | NM_153453    | vestigial like 2 (Drosophila)                                          | 0 | 0 | 0 | 0 | 1 | 0 | 0 | 1 | hsa-miR-622 | -0.11 | N/A | Sites in UTR |

|         |              |                                                              |   |   |   |   |   |   |   |   |             |       |     |              |
|---------|--------------|--------------------------------------------------------------|---|---|---|---|---|---|---|---|-------------|-------|-----|--------------|
| SLCO4C1 | NM_180991    | solute carrier organic anion transporter family, member 4C1  | 0 | 0 | 0 | 0 | 1 | 0 | 0 | 1 | hsa-miR-622 | -0.11 | N/A | Sites in UTR |
| SLC29A1 | NM_001078174 | solute carrier family 29 (nucleoside transporters), member 1 | 0 | 0 | 0 | 0 | 1 | 0 | 1 | 0 | hsa-miR-622 | -0.11 | N/A | Sites in UTR |
| MLF2    | NM_005439    | myeloid leukemia factor 2                                    | 0 | 0 | 0 | 0 | 1 | 0 | 1 | 0 | hsa-miR-622 | -0.11 | N/A | Sites in UTR |
| IL20RA  | NM_014432    | interleukin 20 receptor, alpha                               | 0 | 0 | 0 | 0 | 1 | 0 | 1 | 0 | hsa-miR-622 | -0.11 | N/A | Sites in UTR |
| TULP4   | NM_001007466 | tubby like protein 4                                         | 0 | 0 | 0 | 0 | 1 | 0 | 1 | 0 | hsa-miR-622 | -0.11 | N/A | Sites in UTR |
| RPRD1B  | NM_021215    | regulation of nuclear pre-mRNA domain containing 1B          | 0 | 0 | 0 | 0 | 1 | 0 | 1 | 0 | hsa-miR-622 | -0.11 | N/A | Sites in UTR |
| ERC1    | NM_178039    | ELKS/RAB6-interacting/CAST family member 1                   | 0 | 0 | 0 | 0 | 2 | 0 | 2 | 0 | hsa-miR-622 | -0.11 | N/A | Sites in UTR |
| PNMAL2  | NM_020709    | PNMA-like 2                                                  | 0 | 0 | 0 | 0 | 2 | 0 | 2 | 0 | hsa-miR-622 | -0.11 | N/A | Sites in UTR |
| CHRM5   | NM_012125    | cholinergic receptor, muscarinic 5                           | 0 | 0 | 0 | 0 | 1 | 0 | 0 | 1 | hsa-miR-622 | -0.11 | N/A | Sites in UTR |
| PTPRO   | NM_002848    | protein tyrosine phosphatase, receptor type, O               | 0 | 0 | 0 | 0 | 1 | 0 | 0 | 1 | hsa-miR-622 | -0.11 | N/A | Sites in UTR |
| BEST1   | NM_004183    | bestrophin 1                                                 | 0 | 0 | 0 | 0 | 1 | 0 | 0 | 1 | hsa-miR-622 | -0.11 | N/A | Sites in UTR |
| GDA     | NM_001242505 | guanine deaminase                                            | 0 | 0 | 0 | 0 | 1 | 0 | 0 | 1 | hsa-miR-622 | -0.11 | N/A | Sites in UTR |
| SPCS2   | NM_014752    | signal peptidase complex subunit 2 homolog (S. cerevisiae)   | 0 | 0 | 0 | 0 | 1 | 0 | 0 | 1 | hsa-miR-622 | -0.11 | N/A | Sites in UTR |
| DSE     | NM_001080976 | dermatan sulfate epimerase                                   | 0 | 0 | 0 | 0 | 1 | 0 | 0 | 1 | hsa-miR-622 | -0.11 | N/A | Sites in UTR |
| ZCCHC8  | NM_017612    | zinc finger, CCHC domain containing 8                        | 0 | 0 | 0 | 0 | 1 | 0 | 0 | 1 | hsa-miR-622 | -0.11 | N/A | Sites in UTR |
| B3GALTL | NM_194318    | beta 1,3-galactosyltransferase-like                          | 0 | 0 | 0 | 0 | 1 | 0 | 0 | 1 | hsa-miR-622 | -0.11 | N/A | Sites in UTR |
| WDR16   | NM_001080556 | WD repeat domain 16                                          | 0 | 0 | 0 | 0 | 1 | 0 | 0 | 1 | hsa-miR-622 | -0.11 | N/A | Sites in UTR |
| SPTBN2  | NM_006946    | spectrin, beta, non-erythrocytic 2                           | 0 | 0 | 0 | 0 | 1 | 0 | 1 | 0 | hsa-miR-622 | -0.11 | N/A | Sites in UTR |

|           |              |                                                                                                 |   |   |   |   |   |   |   |   |   |             |       |     |              |
|-----------|--------------|-------------------------------------------------------------------------------------------------|---|---|---|---|---|---|---|---|---|-------------|-------|-----|--------------|
| TRAF7     | NM_032271    | TNF receptor-associated factor 7                                                                | 1 | 0 | 1 | 0 | 0 | 0 | 0 | 0 | 0 | hsa-miR-622 | -0.11 | N/A | Sites in UTR |
| MORN4     | NM_001098831 | MORN repeat containing 4                                                                        | 0 | 0 | 0 | 0 | 1 | 0 | 1 | 0 | 0 | hsa-miR-622 | -0.11 | N/A | Sites in UTR |
| CHMP4B    | NM_176812    | chromatin modifying protein 4B                                                                  | 0 | 0 | 0 | 0 | 1 | 0 | 1 | 0 | 0 | hsa-miR-622 | -0.11 | N/A | Sites in UTR |
| C17orf102 | NM_207454    | chromosome 17 open reading frame 102                                                            | 0 | 0 | 0 | 0 | 2 | 0 | 1 | 1 | 0 | hsa-miR-622 | -0.11 | N/A | Sites in UTR |
| SIDT2     | NM_001040455 | SID1 transmembrane family, member 2                                                             | 1 | 1 | 0 | 0 | 0 | 0 | 0 | 0 | 0 | hsa-miR-622 | -0.11 | N/A | Sites in UTR |
| PPP1R3A   | NM_002711    | protein phosphatase 1, regulatory (inhibitor) subunit 3A                                        | 0 | 0 | 0 | 0 | 1 | 0 | 0 | 0 | 1 | hsa-miR-622 | -0.11 | N/A | Sites in UTR |
| ABCA8     | NM_007168    | ATP-binding cassette, sub-family A (ABC1), member 8                                             | 0 | 0 | 0 | 0 | 1 | 0 | 0 | 0 | 1 | hsa-miR-622 | -0.11 | N/A | Sites in UTR |
| YAP1      | NM_001130145 | Yes-associated protein 1                                                                        | 0 | 0 | 0 | 0 | 2 | 1 | 0 | 0 | 1 | hsa-miR-622 | -0.11 | N/A | Sites in UTR |
| MLLT11    | NM_006818    | myeloid/lymphoid or mixed-lineage leukemia (trithorax homolog, Drosophila); translocated to, 11 | 0 | 0 | 0 | 0 | 1 | 0 | 0 | 0 | 1 | hsa-miR-622 | -0.11 | N/A | Sites in UTR |
| ABI3BP    | NM_015429    | ABI family, member 3 (NESH) binding protein                                                     | 0 | 0 | 0 | 0 | 1 | 0 | 0 | 0 | 1 | hsa-miR-622 | -0.11 | N/A | Sites in UTR |
| TMEM203   | NM_053045    | transmembrane protein 203                                                                       | 0 | 0 | 0 | 0 | 1 | 0 | 0 | 0 | 1 | hsa-miR-622 | -0.11 | N/A | Sites in UTR |
| ARL6IP6   | NM_152522    | ADP-ribosylation-like factor 6 interacting protein 6                                            | 0 | 0 | 0 | 0 | 1 | 0 | 0 | 0 | 1 | hsa-miR-622 | -0.11 | N/A | Sites in UTR |
| TMEM192   | NM_001100389 | transmembrane protein 192                                                                       | 0 | 0 | 0 | 0 | 1 | 0 | 0 | 0 | 1 | hsa-miR-622 | -0.11 | N/A | Sites in UTR |
| ALDH1A3   | NM_000693    | aldehyde dehydrogenase 1 family, member A3                                                      | 0 | 0 | 0 | 0 | 1 | 0 | 1 | 0 | 0 | hsa-miR-622 | -0.11 | N/A | Sites in UTR |
| PDGFA     | NM_002607    | platelet-derived growth factor alpha polypeptide                                                | 0 | 0 | 0 | 0 | 1 | 0 | 1 | 0 | 0 | hsa-miR-622 | -0.11 | N/A | Sites in UTR |
| KLF7      | NM_003709    | Kruppel-like factor 7 (ubiquitous)                                                              | 0 | 0 | 0 | 0 | 1 | 0 | 1 | 0 | 0 | hsa-miR-622 | -0.11 | N/A | Sites in UTR |
| NR2E3     | NM_016346    | nuclear receptor subfamily 2, group E, member 3                                                 | 0 | 0 | 0 | 0 | 1 | 0 | 1 | 0 | 0 | hsa-miR-622 | -0.11 | N/A | Sites in UTR |
| ZNF507    | NM_001136156 | zinc finger protein 507                                                                         | 0 | 0 | 0 | 0 | 1 | 0 | 1 | 0 | 0 | hsa-miR-622 | -0.11 | N/A | Sites in UTR |



|         |              |                                                                                 |   |   |   |   |   |   |   |   |             |       |     |              |
|---------|--------------|---------------------------------------------------------------------------------|---|---|---|---|---|---|---|---|-------------|-------|-----|--------------|
| C1orf43 | NM_001098616 | chromosome 1 open reading frame 43                                              | 0 | 0 | 0 | 0 | 1 | 0 | 1 | 0 | hsa-miR-622 | -0.11 | N/A | Sites in UTR |
| LRRC1   | NM_018214    | leucine rich repeat containing 1                                                | 0 | 0 | 0 | 0 | 1 | 0 | 1 | 0 | hsa-miR-622 | -0.11 | N/A | Sites in UTR |
| CWF19L2 | NM_152434    | CWF19-like 2, cell cycle control ( <i>S. pombe</i> )                            | 0 | 0 | 0 | 0 | 1 | 0 | 1 | 0 | hsa-miR-622 | -0.11 | N/A | Sites in UTR |
| FAM190A | NM_207491    | family with sequence similarity 190, member A                                   | 0 | 0 | 0 | 0 | 1 | 0 | 1 | 0 | hsa-miR-622 | -0.11 | N/A | Sites in UTR |
| DUXA    | NM_001012729 | double homeobox A                                                               | 0 | 0 | 0 | 0 | 1 | 0 | 1 | 0 | hsa-miR-622 | -0.11 | N/A | Sites in UTR |
| SEMA6A  | NM_020796    | sema domain, transmembrane domain (TM), and cytoplasmic domain, (semaphorin) 6A | 0 | 0 | 0 | 0 | 2 | 0 | 1 | 1 | hsa-miR-622 | -0.11 | N/A | Sites in UTR |
| ZBTB44  | NM_014155    | zinc finger and BTB domain containing 44                                        | 0 | 0 | 0 | 0 | 2 | 1 | 1 | 0 | hsa-miR-622 | -0.11 | N/A | Sites in UTR |
| B7H6    | NM_001202439 | B7 homolog 6                                                                    | 0 | 0 | 0 | 0 | 4 | 0 | 4 | 0 | hsa-miR-622 | -0.11 | N/A | Sites in UTR |
| ISLR    | NM_005545    | immunoglobulin superfamily containing leucine-rich repeat                       | 0 | 0 | 0 | 0 | 1 | 0 | 0 | 1 | hsa-miR-622 | -0.11 | N/A | Sites in UTR |
| SNX24   | NM_014035    | sorting nexin 24                                                                | 0 | 0 | 0 | 0 | 1 | 0 | 0 | 1 | hsa-miR-622 | -0.11 | N/A | Sites in UTR |
| PILRA   | NM_013439    | paired immunoglobulin-like type 2 receptor alpha                                | 0 | 0 | 0 | 0 | 1 | 0 | 0 | 1 | hsa-miR-622 | -0.11 | N/A | Sites in UTR |
| NKRF    | NM_001173487 | NFKB repressing factor                                                          | 0 | 0 | 0 | 0 | 1 | 0 | 0 | 1 | hsa-miR-622 | -0.11 | N/A | Sites in UTR |
| DACH2   | NM_001139514 | dachshund homolog 2 ( <i>Drosophila</i> )                                       | 0 | 0 | 0 | 0 | 1 | 0 | 0 | 1 | hsa-miR-622 | -0.11 | N/A | Sites in UTR |
| TMEM41B | NM_015012    | transmembrane protein 41B                                                       | 0 | 0 | 0 | 0 | 1 | 0 | 0 | 1 | hsa-miR-622 | -0.11 | N/A | Sites in UTR |
| EIF5A   | NM_001143760 | eukaryotic translation initiation factor 5A                                     | 0 | 0 | 0 | 0 | 1 | 0 | 1 | 0 | hsa-miR-622 | -0.11 | N/A | Sites in UTR |
| GJC2    | NM_020435    | gap junction protein, gamma 2, 47kDa                                            | 0 | 0 | 0 | 0 | 1 | 0 | 1 | 0 | hsa-miR-622 | -0.11 | N/A | Sites in UTR |
| FAM19A3 | NM_001004440 | family with sequence similarity 19 (chemokine (C-C motif)-like), member A3      | 0 | 0 | 0 | 0 | 1 | 0 | 1 | 0 | hsa-miR-622 | -0.11 | N/A | Sites in UTR |
| TIMP3   | NM_000362    | TIMP metalloproteinase inhibitor 3                                              | 0 | 0 | 0 | 0 | 2 | 0 | 1 | 1 | hsa-miR-622 | -0.11 | N/A | Sites in UTR |

|          |              |                                                          |   |   |   |   |   |   |   |   |             |       |     |              |
|----------|--------------|----------------------------------------------------------|---|---|---|---|---|---|---|---|-------------|-------|-----|--------------|
| ZNF19    | NM_006961    | zinc finger protein 19                                   | 0 | 0 | 0 | 0 | 1 | 0 | 0 | 1 | hsa-miR-622 | -0.11 | N/A | Sites in UTR |
| TSC22D1  | NM_006022    | TSC22 domain family, member 1                            | 0 | 0 | 0 | 0 | 1 | 0 | 0 | 1 | hsa-miR-622 | -0.11 | N/A | Sites in UTR |
| GDF11    | NM_005811    | growth differentiation factor 11                         | 0 | 0 | 0 | 0 | 1 | 0 | 0 | 1 | hsa-miR-622 | -0.11 | N/A | Sites in UTR |
| C1orf109 | NM_017850    | chromosome 1 open reading frame 109                      | 0 | 0 | 0 | 0 | 1 | 0 | 0 | 1 | hsa-miR-622 | -0.11 | N/A | Sites in UTR |
| RNF150   | NM_020724    | ring finger protein 150                                  | 0 | 0 | 0 | 0 | 1 | 0 | 0 | 1 | hsa-miR-622 | -0.11 | N/A | Sites in UTR |
| CXCL16   | NM_001100812 | chemokine (C-X-C motif) ligand 16                        | 0 | 0 | 0 | 0 | 1 | 0 | 0 | 1 | hsa-miR-622 | -0.11 | N/A | Sites in UTR |
| ACTR5    | NM_024855    | ARF5 actin-related protein 5 homolog (yeast)             | 0 | 0 | 0 | 0 | 1 | 0 | 0 | 1 | hsa-miR-622 | -0.11 | N/A | Sites in UTR |
| C9orf123 | NM_033428    | chromosome 9 open reading frame 123                      | 1 | 0 | 0 | 1 | 0 | 0 | 0 | 0 | hsa-miR-622 | -0.11 | N/A | Sites in UTR |
| GORAB    | NM_152281    | golgin, RAB6-interacting                                 | 0 | 0 | 0 | 0 | 1 | 0 | 0 | 1 | hsa-miR-622 | -0.11 | N/A | Sites in UTR |
| LRRC42   | NM_052940    | leucine rich repeat containing 42                        | 0 | 0 | 0 | 0 | 1 | 0 | 0 | 1 | hsa-miR-622 | -0.11 | N/A | Sites in UTR |
| BCL2L15  | NM_001010922 | BCL2-like 15                                             | 0 | 0 | 0 | 0 | 1 | 0 | 0 | 1 | hsa-miR-622 | -0.11 | N/A | Sites in UTR |
| RIOK3    | NM_003831    | RIO kinase 3 (yeast)                                     | 0 | 0 | 0 | 0 | 1 | 0 | 1 | 0 | hsa-miR-622 | -0.11 | N/A | Sites in UTR |
| ABCF2    | NM_007189    | ATP-binding cassette, sub-family F (GCN20), member 2     | 0 | 0 | 0 | 0 | 1 | 0 | 1 | 0 | hsa-miR-622 | -0.11 | N/A | Sites in UTR |
| MPZL2    | NM_005797    | myelin protein zero-like 2                               | 0 | 0 | 0 | 0 | 1 | 0 | 1 | 0 | hsa-miR-622 | -0.11 | N/A | Sites in UTR |
| LARS2    | NM_015340    | leucyl-tRNA synthetase 2, mitochondrial                  | 0 | 0 | 0 | 0 | 1 | 0 | 1 | 0 | hsa-miR-622 | -0.11 | N/A | Sites in UTR |
| ZDHHC8   | NM_001185024 | zinc finger, DHHC-type containing 8                      | 0 | 0 | 0 | 0 | 1 | 0 | 1 | 0 | hsa-miR-622 | -0.11 | N/A | Sites in UTR |
| CCDC88A  | NM_001135597 | coiled-coil domain containing 88A                        | 1 | 0 | 1 | 0 | 0 | 0 | 0 | 0 | hsa-miR-622 | -0.11 | N/A | Sites in UTR |
| TIFA     | NM_052864    | TRAF-interacting protein with forkhead-associated domain | 0 | 0 | 0 | 0 | 1 | 0 | 1 | 0 | hsa-miR-622 | -0.11 | N/A | Sites in UTR |

|          |              |                                                                  |   |   |   |   |   |   |   |   |             |       |     |              |
|----------|--------------|------------------------------------------------------------------|---|---|---|---|---|---|---|---|-------------|-------|-----|--------------|
| SLC36A2  | NM_181776    | solute carrier family 36 (proton/amino acid symporter), member 2 | 0 | 0 | 0 | 0 | 1 | 0 | 1 | 0 | hsa-miR-622 | -0.11 | N/A | Sites in UTR |
| RGSL1    | NM_001137669 | regulator of G-protein signaling like 1                          | 0 | 0 | 0 | 0 | 1 | 0 | 1 | 0 | hsa-miR-622 | -0.11 | N/A | Sites in UTR |
| CASP10   | NM_001206524 | caspace 10, apoptosis-related cysteine peptidase                 | 0 | 0 | 0 | 0 | 2 | 0 | 2 | 0 | hsa-miR-622 | -0.11 | N/A | Sites in UTR |
| SLC7A14  | NM_020949    | solute carrier family 7 (orphan transporter), member 14          | 0 | 0 | 0 | 0 | 2 | 0 | 1 | 1 | hsa-miR-622 | -0.11 | N/A | Sites in UTR |
| GTF2H1   | NM_001142307 | general transcription factor IIH, polypeptide 1, 62kDa           | 0 | 0 | 0 | 0 | 1 | 0 | 0 | 1 | hsa-miR-622 | -0.11 | N/A | Sites in UTR |
| RGS2     | NM_002923    | regulator of G-protein signaling 2, 24kDa                        | 0 | 0 | 0 | 0 | 1 | 0 | 0 | 1 | hsa-miR-622 | -0.11 | N/A | Sites in UTR |
| STAG1    | NM_005862    | stromal antigen 1                                                | 0 | 0 | 0 | 0 | 1 | 0 | 0 | 1 | hsa-miR-622 | -0.11 | N/A | Sites in UTR |
| DOCK11   | NM_144658    | dedicator of cytokinesis 11                                      | 0 | 0 | 0 | 0 | 1 | 0 | 0 | 1 | hsa-miR-622 | -0.11 | N/A | Sites in UTR |
| CHUK     | NM_001278    | conserved helix-loop-helix ubiquitous kinase                     | 0 | 0 | 0 | 0 | 1 | 0 | 1 | 0 | hsa-miR-622 | -0.11 | N/A | Sites in UTR |
| EFNB1    | NM_004429    | ephrin-B1                                                        | 1 | 0 | 1 | 0 | 0 | 0 | 0 | 0 | hsa-miR-622 | -0.11 | N/A | Sites in UTR |
| MAT1A    | NM_000429    | methionine adenosyltransferase I, alpha                          | 0 | 0 | 0 | 0 | 1 | 0 | 1 | 0 | hsa-miR-622 | -0.11 | N/A | Sites in UTR |
| ZDHHC22  | NM_174976    | zinc finger, DHHC-type containing 22                             | 0 | 0 | 0 | 0 | 1 | 0 | 1 | 0 | hsa-miR-622 | -0.11 | N/A | Sites in UTR |
| ALG1L2   | NM_001136152 | asparagine-linked glycosylation 1-like 2                         | 0 | 0 | 0 | 0 | 1 | 0 | 1 | 0 | hsa-miR-622 | -0.11 | N/A | Sites in UTR |
| C22orf46 | NM_001142964 | chromosome 22 open reading frame 46                              | 0 | 0 | 0 | 0 | 2 | 0 | 2 | 0 | hsa-miR-622 | -0.11 | N/A | Sites in UTR |
| ATP6VOA1 | NM_001130020 | ATPase, H+ transporting, lysosomal V0 subunit a1                 | 0 | 0 | 0 | 0 | 1 | 1 | 0 | 0 | hsa-miR-622 | -0.11 | N/A | Sites in UTR |
| PDK4     | NM_002612    | pyruvate dehydrogenase kinase, isozyme 4                         | 0 | 0 | 0 | 0 | 1 | 0 | 0 | 1 | hsa-miR-622 | -0.11 | N/A | Sites in UTR |
| CEP170   | NM_001042404 | centrosomal protein 170kDa                                       | 0 | 0 | 0 | 0 | 1 | 0 | 0 | 1 | hsa-miR-622 | -0.11 | N/A | Sites in UTR |
| UBA6     | NM_018227    | ubiquitin-like modifier activating enzyme 6                      | 0 | 0 | 0 | 0 | 1 | 0 | 0 | 1 | hsa-miR-622 | -0.11 | N/A | Sites in UTR |

|          |              |                                                         |   |   |   |   |   |   |   |   |             |       |     |              |
|----------|--------------|---------------------------------------------------------|---|---|---|---|---|---|---|---|-------------|-------|-----|--------------|
| SPAG17   | NM_206996    | sperm associated antigen 17                             | 0 | 0 | 0 | 0 | 1 | 0 | 0 | 1 | hsa-miR-622 | -0.11 | N/A | Sites in UTR |
| FAM26E   | NM_153711    | family with sequence similarity 26, member E            | 0 | 0 | 0 | 0 | 1 | 0 | 0 | 1 | hsa-miR-622 | -0.11 | N/A | Sites in UTR |
| ZNF491   | NM_152356    | zinc finger protein 491                                 | 0 | 0 | 0 | 0 | 1 | 0 | 1 | 0 | hsa-miR-622 | -0.11 | N/A | Sites in UTR |
| ZNF827   | NM_178835    | zinc finger protein 827                                 | 0 | 0 | 0 | 0 | 1 | 0 | 1 | 0 | hsa-miR-622 | -0.11 | N/A | Sites in UTR |
| CCDC85C  | NM_001144995 | coiled-coil domain containing 85C                       | 0 | 0 | 0 | 0 | 1 | 0 | 1 | 0 | hsa-miR-622 | -0.11 | N/A | Sites in UTR |
| VAMP4    | NM_001185127 | vesicle-associated membrane protein 4                   | 0 | 0 | 0 | 0 | 2 | 2 | 0 | 0 | hsa-miR-622 | -0.11 | N/A | Sites in UTR |
| CHD1     | NM_001270    | chromodomain helicase DNA binding protein 1             | 0 | 0 | 0 | 0 | 1 | 0 | 0 | 1 | hsa-miR-622 | -0.11 | N/A | Sites in UTR |
| MSTN     | NM_005259    | myostatin                                               | 0 | 0 | 0 | 0 | 1 | 0 | 0 | 1 | hsa-miR-622 | -0.11 | N/A | Sites in UTR |
| ZNF195   | NM_001130519 | zinc finger protein 195                                 | 0 | 0 | 0 | 0 | 1 | 0 | 0 | 1 | hsa-miR-622 | -0.11 | N/A | Sites in UTR |
| LDB1     | NM_001113407 | LIM domain binding 1                                    | 0 | 0 | 0 | 0 | 1 | 0 | 0 | 1 | hsa-miR-622 | -0.11 | N/A | Sites in UTR |
| TMED10   | NM_006827    | transmembrane emp24-like trafficking protein 10 (yeast) | 0 | 0 | 0 | 0 | 1 | 0 | 0 | 1 | hsa-miR-622 | -0.11 | N/A | Sites in UTR |
| ERRF1    | NM_018948    | ERBB receptor feedback inhibitor 1                      | 0 | 0 | 0 | 0 | 1 | 0 | 0 | 1 | hsa-miR-622 | -0.11 | N/A | Sites in UTR |
| KIF26B   | NM_018012    | kinesin family member 26B                               | 0 | 0 | 0 | 0 | 1 | 0 | 0 | 1 | hsa-miR-622 | -0.11 | N/A | Sites in UTR |
| ODF2L    | NM_001007022 | outer dense fiber of sperm tails 2-like                 | 0 | 0 | 0 | 0 | 1 | 0 | 0 | 1 | hsa-miR-622 | -0.11 | N/A | Sites in UTR |
| DUSP21   | NM_022076    | dual specificity phosphatase 21                         | 0 | 0 | 0 | 0 | 1 | 0 | 0 | 1 | hsa-miR-622 | -0.11 | N/A | Sites in UTR |
| ZNF397   | NM_032347    | zinc finger protein 397                                 | 0 | 0 | 0 | 0 | 1 | 0 | 0 | 1 | hsa-miR-622 | -0.11 | N/A | Sites in UTR |
| KIAA1267 | NM_001193465 | KIAA1267                                                | 0 | 0 | 0 | 0 | 1 | 0 | 0 | 1 | hsa-miR-622 | -0.11 | N/A | Sites in UTR |
| EDNRA    | NM_001166055 | endothelin receptor type A                              | 1 | 0 | 1 | 0 | 0 | 0 | 0 | 0 | hsa-miR-622 | -0.11 | N/A | Sites in UTR |

|          |              |                                                                     |   |   |   |   |   |   |   |   |             |       |     |              |
|----------|--------------|---------------------------------------------------------------------|---|---|---|---|---|---|---|---|-------------|-------|-----|--------------|
| SYNPO    | NM_007286    | synaptopodin                                                        | 0 | 0 | 0 | 0 | 1 | 0 | 1 | 0 | hsa-miR-622 | -0.11 | N/A | Sites in UTR |
| SLC44A2  | NM_001145056 | solute carrier family 44, member 2                                  | 0 | 0 | 0 | 0 | 1 | 0 | 1 | 0 | hsa-miR-622 | -0.11 | N/A | Sites in UTR |
| EDA2R    | NM_001199687 | ectodysplasin A2 receptor                                           | 0 | 0 | 0 | 0 | 1 | 0 | 1 | 0 | hsa-miR-622 | -0.11 | N/A | Sites in UTR |
| SORBS1   | NM_001034954 | sorbin and SH3 domain containing 1                                  | 1 | 0 | 0 | 1 | 2 | 1 | 0 | 1 | hsa-miR-622 | -0.11 | N/A | Sites in UTR |
| SLC2A2   | NM_000340    | solute carrier family 2 (facilitated glucose transporter), member 2 | 0 | 0 | 0 | 0 | 1 | 0 | 0 | 1 | hsa-miR-622 | -0.11 | N/A | Sites in UTR |
| PITPNB   | NM_012399    | phosphatidylinositol transfer protein, beta                         | 0 | 0 | 0 | 0 | 1 | 0 | 0 | 1 | hsa-miR-622 | -0.11 | N/A | Sites in UTR |
| C1orf56  | NM_017860    | chromosome 1 open reading frame 56                                  | 0 | 0 | 0 | 0 | 1 | 0 | 0 | 1 | hsa-miR-622 | -0.11 | N/A | Sites in UTR |
| C6orf25  | NM_025260    | chromosome 6 open reading frame 25                                  | 0 | 0 | 0 | 0 | 1 | 0 | 0 | 1 | hsa-miR-622 | -0.11 | N/A | Sites in UTR |
| AFAP1L2  | NM_001001936 | actin filament associated protein 1-like 2                          | 0 | 0 | 0 | 0 | 1 | 0 | 0 | 1 | hsa-miR-622 | -0.11 | N/A | Sites in UTR |
| ABCC12   | NM_033226    | ATP-binding cassette, sub-family C (CFTR/MRP), member 12            | 0 | 0 | 0 | 0 | 1 | 0 | 0 | 1 | hsa-miR-622 | -0.11 | N/A | Sites in UTR |
| CD300LG  | NM_001168324 | CD300 molecule-like family member g                                 | 0 | 0 | 0 | 0 | 1 | 0 | 0 | 1 | hsa-miR-622 | -0.11 | N/A | Sites in UTR |
| SLC35F3  | NM_173508    | solute carrier family 35, member F3                                 | 0 | 0 | 0 | 0 | 1 | 0 | 0 | 1 | hsa-miR-622 | -0.11 | N/A | Sites in UTR |
| EDNRB    | NM_000115    | endothelin receptor type B                                          | 0 | 0 | 0 | 0 | 1 | 0 | 1 | 0 | hsa-miR-622 | -0.11 | N/A | Sites in UTR |
| PLEKHA5  | NM_001190860 | pleckstrin homology domain containing, family A member 5            | 0 | 0 | 0 | 0 | 1 | 0 | 1 | 0 | hsa-miR-622 | -0.11 | N/A | Sites in UTR |
| MESP1    | NM_018670    | mesoderm posterior 1 homolog (mouse)                                | 0 | 0 | 0 | 0 | 1 | 0 | 1 | 0 | hsa-miR-622 | -0.11 | N/A | Sites in UTR |
| HPS4     | NM_022081    | Hermansky-Pudlak syndrome 4                                         | 0 | 0 | 0 | 0 | 1 | 0 | 1 | 0 | hsa-miR-622 | -0.11 | N/A | Sites in UTR |
| ARHGAP40 | NM_001164431 | Rho GTPase activating protein 40                                    | 0 | 0 | 0 | 0 | 1 | 0 | 1 | 0 | hsa-miR-622 | -0.11 | N/A | Sites in UTR |
| ZBTB46   | NM_025224    | zinc finger and BTB domain containing 46                            | 0 | 0 | 0 | 0 | 1 | 1 | 0 | 0 | hsa-miR-622 | -0.11 | N/A | Sites in UTR |

|          |              |                                                            |   |   |   |   |   |   |   |   |             |       |     |              |
|----------|--------------|------------------------------------------------------------|---|---|---|---|---|---|---|---|-------------|-------|-----|--------------|
| MCOLN2   | NM_153259    | mucolipin 2                                                | 0 | 0 | 0 | 0 | 1 | 1 | 0 | 0 | hsa-miR-622 | -0.11 | N/A | Sites in UTR |
| RNF170   | NM_001160223 | ring finger protein 170                                    | 0 | 0 | 0 | 0 | 2 | 0 | 2 | 0 | hsa-miR-622 | -0.11 | N/A | Sites in UTR |
| RPS6KL1  | NM_031464    | ribosomal protein S6 kinase-like 1                         | 0 | 0 | 0 | 0 | 2 | 0 | 1 | 1 | hsa-miR-622 | -0.11 | N/A | Sites in UTR |
| FAM135B  | NM_015912    | family with sequence similarity 135, member B              | 0 | 0 | 0 | 0 | 2 | 1 | 0 | 1 | hsa-miR-622 | -0.11 | N/A | Sites in UTR |
| COL19A1  | NM_001858    | collagen, type XIX, alpha 1                                | 0 | 0 | 0 | 0 | 1 | 0 | 0 | 1 | hsa-miR-622 | -0.1  | N/A | Sites in UTR |
| ZNF510   | NM_014930    | zinc finger protein 510                                    | 0 | 0 | 0 | 0 | 1 | 0 | 0 | 1 | hsa-miR-622 | -0.1  | N/A | Sites in UTR |
| WDR52    | NM_001164496 | WD repeat domain 52                                        | 0 | 0 | 0 | 0 | 1 | 0 | 0 | 1 | hsa-miR-622 | -0.1  | N/A | Sites in UTR |
| FAM111A  | NM_001142519 | family with sequence similarity 111, member A              | 0 | 0 | 0 | 0 | 1 | 0 | 0 | 1 | hsa-miR-622 | -0.1  | N/A | Sites in UTR |
| PLD5     | NM_001195811 | phospholipase D family, member 5                           | 0 | 0 | 0 | 0 | 1 | 0 | 0 | 1 | hsa-miR-622 | -0.1  | N/A | Sites in UTR |
| C4orf3   | NM_001001701 | chromosome 4 open reading frame 3                          | 0 | 0 | 0 | 0 | 1 | 0 | 0 | 1 | hsa-miR-622 | -0.1  | N/A | Sites in UTR |
| MTA2     | NM_004739    | metastasis associated 1 family, member 2                   | 0 | 0 | 0 | 0 | 1 | 0 | 1 | 0 | hsa-miR-622 | -0.1  | N/A | Sites in UTR |
| CDCP1    | NM_022842    | CUB domain containing protein 1                            | 0 | 0 | 0 | 0 | 1 | 0 | 1 | 0 | hsa-miR-622 | -0.1  | N/A | Sites in UTR |
| C12orf43 | NM_022895    | chromosome 12 open reading frame 43                        | 0 | 0 | 0 | 0 | 1 | 0 | 1 | 0 | hsa-miR-622 | -0.1  | N/A | Sites in UTR |
| MEGF10   | NM_032446    | multiple EGF-like-domains 10                               | 0 | 0 | 0 | 0 | 1 | 0 | 1 | 0 | hsa-miR-622 | -0.1  | N/A | Sites in UTR |
| GUCY1A3  | NM_001130683 | guanylate cyclase 1, soluble, alpha 3                      | 0 | 0 | 0 | 0 | 2 | 0 | 1 | 1 | hsa-miR-622 | -0.1  | N/A | Sites in UTR |
| DIS3     | NM_001128226 | DIS3 mitotic control homolog (S. cerevisiae)               | 0 | 0 | 0 | 0 | 1 | 1 | 0 | 0 | hsa-miR-622 | -0.1  | N/A | Sites in UTR |
| GMFB     | NM_004124    | glia maturation factor, beta                               | 0 | 0 | 0 | 0 | 1 | 0 | 0 | 1 | hsa-miR-622 | -0.1  | N/A | Sites in UTR |
| PSMD7    | NM_002811    | proteasome (prosome, macropain) 26S subunit, non-ATPase, 7 | 0 | 0 | 0 | 0 | 1 | 0 | 0 | 1 | hsa-miR-622 | -0.1  | N/A | Sites in UTR |

|           |              |                                                                             |   |   |   |   |   |   |   |   |             |      |     |              |
|-----------|--------------|-----------------------------------------------------------------------------|---|---|---|---|---|---|---|---|-------------|------|-----|--------------|
| COBL      | NM_015198    | cordons-bleu homolog (mouse)                                                | 0 | 0 | 0 | 0 | 1 | 0 | 0 | 1 | hsa-miR-622 | -0.1 | N/A | Sites in UTR |
| MTRF1L    | NM_001114184 | mitochondrial translational release factor 1-like                           | 0 | 0 | 0 | 0 | 1 | 0 | 0 | 1 | hsa-miR-622 | -0.1 | N/A | Sites in UTR |
| TMUB2     | NM_001076674 | transmembrane and ubiquitin-like domain containing 2                        | 0 | 0 | 0 | 0 | 1 | 0 | 0 | 1 | hsa-miR-622 | -0.1 | N/A | Sites in UTR |
| ZNF547    | NM_173631    | zinc finger protein 547                                                     | 0 | 0 | 0 | 0 | 1 | 0 | 0 | 1 | hsa-miR-622 | -0.1 | N/A | Sites in UTR |
| GRSF1     | NM_001098477 | G-rich RNA sequence binding factor 1                                        | 0 | 0 | 0 | 0 | 1 | 0 | 1 | 0 | hsa-miR-622 | -0.1 | N/A | Sites in UTR |
| NFIB      | NM_001190737 | nuclear factor I/B                                                          | 0 | 0 | 0 | 0 | 1 | 0 | 1 | 0 | hsa-miR-622 | -0.1 | N/A | Sites in UTR |
| HMGXB3    | NM_014983    | HMG box domain containing 3                                                 | 1 | 0 | 1 | 0 | 0 | 0 | 0 | 0 | hsa-miR-622 | -0.1 | N/A | Sites in UTR |
| CIDEC     | NM_001199551 | cell death-inducing DFFA-like effector c                                    | 0 | 0 | 0 | 0 | 1 | 0 | 1 | 0 | hsa-miR-622 | -0.1 | N/A | Sites in UTR |
| HIF3A     | NM_022462    | hypoxia inducible factor 3, alpha subunit                                   | 0 | 0 | 0 | 0 | 1 | 0 | 1 | 0 | hsa-miR-622 | -0.1 | N/A | Sites in UTR |
| CCDC3     | NM_031455    | coiled-coil domain containing 3                                             | 0 | 0 | 0 | 0 | 1 | 0 | 1 | 0 | hsa-miR-622 | -0.1 | N/A | Sites in UTR |
| JDP2      | NM_001135047 | Jun dimerization protein 2                                                  | 1 | 0 | 1 | 0 | 0 | 0 | 0 | 0 | hsa-miR-622 | -0.1 | N/A | Sites in UTR |
| TCEB3     | NM_003198    | transcription elongation factor B (SIII), polypeptide 3 (110kDa, elongin A) | 0 | 0 | 0 | 0 | 1 | 1 | 0 | 0 | hsa-miR-622 | -0.1 | N/A | Sites in UTR |
| ZNF84     | NM_001127372 | zinc finger protein 84                                                      | 0 | 0 | 0 | 0 | 1 | 1 | 0 | 0 | hsa-miR-622 | -0.1 | N/A | Sites in UTR |
| LRTOMT    | NM_001145308 | leucine rich transmembrane and O-methyltransferase domain containing        | 1 | 1 | 0 | 0 | 0 | 0 | 0 | 0 | hsa-miR-622 | -0.1 | N/A | Sites in UTR |
| IL11RA    | NM_147162    | interleukin 11 receptor, alpha                                              | 0 | 0 | 0 | 0 | 1 | 0 | 0 | 1 | hsa-miR-622 | -0.1 | N/A | Sites in UTR |
| ZC3H11A   | NM_014827    | zinc finger CCCH-type containing 11A                                        | 0 | 0 | 0 | 0 | 1 | 0 | 0 | 1 | hsa-miR-622 | -0.1 | N/A | Sites in UTR |
| HAVCR1    | NM_001099414 | hepatitis A virus cellular receptor 1                                       | 0 | 0 | 0 | 0 | 1 | 0 | 0 | 1 | hsa-miR-622 | -0.1 | N/A | Sites in UTR |
| C20orf111 | NM_016470    | chromosome 20 open reading frame 111                                        | 0 | 0 | 0 | 0 | 1 | 0 | 0 | 1 | hsa-miR-622 | -0.1 | N/A | Sites in UTR |

|          |              |                                                                          |   |   |   |   |   |   |   |   |             |      |     |              |
|----------|--------------|--------------------------------------------------------------------------|---|---|---|---|---|---|---|---|-------------|------|-----|--------------|
| MRPS10   | NM_018141    | mitochondrial ribosomal protein S10                                      | 0 | 0 | 0 | 0 | 1 | 0 | 0 | 1 | hsa-miR-622 | -0.1 | N/A | Sites in UTR |
| ZBTB26   | NM_020924    | zinc finger and BTB domain containing 26                                 | 0 | 0 | 0 | 0 | 1 | 0 | 0 | 1 | hsa-miR-622 | -0.1 | N/A | Sites in UTR |
| PAPD5    | NM_001040284 | PAP associated domain containing 5                                       | 1 | 0 | 0 | 1 | 0 | 0 | 0 | 0 | hsa-miR-622 | -0.1 | N/A | Sites in UTR |
| C15orf41 | NM_032499    | chromosome 15 open reading frame 41                                      | 0 | 0 | 0 | 0 | 1 | 0 | 0 | 1 | hsa-miR-622 | -0.1 | N/A | Sites in UTR |
| NFXL1    | NM_152995    | nuclear transcription factor, X-box binding-like 1                       | 0 | 0 | 0 | 0 | 1 | 0 | 0 | 1 | hsa-miR-622 | -0.1 | N/A | Sites in UTR |
| MMP15    | NM_002428    | matrix metalloproteinase 15 (membrane-inserted)                          | 0 | 0 | 0 | 0 | 1 | 0 | 1 | 0 | hsa-miR-622 | -0.1 | N/A | Sites in UTR |
| MYBPC3   | NM_000256    | myosin binding protein C, cardiac                                        | 0 | 0 | 0 | 0 | 1 | 0 | 1 | 0 | hsa-miR-622 | -0.1 | N/A | Sites in UTR |
| FRAT1    | NM_005479    | frequently rearranged in advanced T-cell lymphomas                       | 0 | 0 | 0 | 0 | 1 | 0 | 1 | 0 | hsa-miR-622 | -0.1 | N/A | Sites in UTR |
| VAMP5    | NM_006634    | vesicle-associated membrane protein 5 (myobrevin)                        | 0 | 0 | 0 | 0 | 1 | 0 | 1 | 0 | hsa-miR-622 | -0.1 | N/A | Sites in UTR |
| KIAA0368 | NM_001080398 | KIAA0368                                                                 | 0 | 0 | 0 | 0 | 1 | 0 | 1 | 0 | hsa-miR-622 | -0.1 | N/A | Sites in UTR |
| GTPBP2   | NM_019096    | GTP binding protein 2                                                    | 0 | 0 | 0 | 0 | 1 | 0 | 1 | 0 | hsa-miR-622 | -0.1 | N/A | Sites in UTR |
| ACSS2    | NM_001076552 | acyl-CoA synthetase short-chain family member 2                          | 0 | 0 | 0 | 0 | 1 | 0 | 1 | 0 | hsa-miR-622 | -0.1 | N/A | Sites in UTR |
| TJAP1    | NM_001146016 | tight junction associated protein 1 (peripheral)                         | 0 | 0 | 0 | 0 | 1 | 0 | 1 | 0 | hsa-miR-622 | -0.1 | N/A | Sites in UTR |
| HENMT1   | NM_001102592 | HEN1 methyltransferase homolog 1 (Arabidopsis)                           | 0 | 0 | 0 | 0 | 1 | 0 | 1 | 0 | hsa-miR-622 | -0.1 | N/A | Sites in UTR |
| SLC16A14 | NM_152527    | solute carrier family 16, member 14 (monocarboxylic acid transporter 14) | 0 | 0 | 0 | 0 | 1 | 0 | 1 | 0 | hsa-miR-622 | -0.1 | N/A | Sites in UTR |
| STEAP2   | NM_001040665 | six transmembrane epithelial antigen of the prostate 2                   | 0 | 0 | 0 | 0 | 1 | 0 | 1 | 0 | hsa-miR-622 | -0.1 | N/A | Sites in UTR |
| KRT73    | NM_175068    | keratin 73                                                               | 0 | 0 | 0 | 0 | 1 | 0 | 1 | 0 | hsa-miR-622 | -0.1 | N/A | Sites in UTR |
| PCSK5    | NM_001190482 | proprotein convertase subtilisin/kexin type 5                            | 0 | 0 | 0 | 0 | 2 | 0 | 0 | 2 | hsa-miR-622 | -0.1 | N/A | Sites in UTR |



|          |              |                                                                                |   |   |   |   |   |   |   |   |             |      |     |              |
|----------|--------------|--------------------------------------------------------------------------------|---|---|---|---|---|---|---|---|-------------|------|-----|--------------|
| C17orf51 | NM_001113434 | chromosome 17 open reading frame 51                                            | 0 | 0 | 0 | 0 | 2 | 0 | 2 | 0 | hsa-miR-622 | -0.1 | N/A | Sites in UTR |
| MPZL1    | NM_001146191 | myelin protein zero-like 1                                                     | 0 | 0 | 0 | 0 | 1 | 0 | 0 | 1 | hsa-miR-622 | -0.1 | N/A | Sites in UTR |
| RABGAP1L | NM_001035230 | RAB GTPase activating protein 1-like                                           | 0 | 0 | 0 | 0 | 1 | 0 | 0 | 1 | hsa-miR-622 | -0.1 | N/A | Sites in UTR |
| ENAM     | NM_031889    | enamelin                                                                       | 0 | 0 | 0 | 0 | 1 | 0 | 0 | 1 | hsa-miR-622 | -0.1 | N/A | Sites in UTR |
| MAEA     | NM_001017405 | macrophage erythroblast attacher                                               | 0 | 0 | 0 | 0 | 1 | 0 | 0 | 1 | hsa-miR-622 | -0.1 | N/A | Sites in UTR |
| KDM1A    | NM_001009999 | lysine (K)-specific demethylase 1A                                             | 0 | 0 | 0 | 0 | 1 | 0 | 0 | 1 | hsa-miR-622 | -0.1 | N/A | Sites in UTR |
| TBC1D12  | NM_015188    | TBC1 domain family, member 12                                                  | 0 | 0 | 0 | 0 | 1 | 0 | 0 | 1 | hsa-miR-622 | -0.1 | N/A | Sites in UTR |
| RPP25    | NM_017793    | ribonuclease P/MRP 25kDa subunit                                               | 0 | 0 | 0 | 0 | 1 | 0 | 0 | 1 | hsa-miR-622 | -0.1 | N/A | Sites in UTR |
| SLC25A23 | NM_024103    | solute carrier family 25 (mitochondrial carrier; phosphate carrier), member 23 | 0 | 0 | 0 | 0 | 1 | 0 | 0 | 1 | hsa-miR-622 | -0.1 | N/A | Sites in UTR |
| TMC5     | NM_001105248 | transmembrane channel-like 5                                                   | 0 | 0 | 0 | 0 | 1 | 0 | 0 | 1 | hsa-miR-622 | -0.1 | N/A | Sites in UTR |
| ZNF396   | NM_145756    | zinc finger protein 396                                                        | 0 | 0 | 0 | 0 | 1 | 0 | 0 | 1 | hsa-miR-622 | -0.1 | N/A | Sites in UTR |
| TAL1     | NM_003189    | T-cell acute lymphocytic leukemia 1                                            | 0 | 0 | 0 | 0 | 1 | 0 | 1 | 0 | hsa-miR-622 | -0.1 | N/A | Sites in UTR |
| SLC22A13 | NM_004256    | solute carrier family 22 (organic anion transporter), member 13                | 0 | 0 | 0 | 0 | 1 | 0 | 1 | 0 | hsa-miR-622 | -0.1 | N/A | Sites in UTR |
| RUNDC3A  | NM_001144826 | RUN domain containing 3A                                                       | 1 | 0 | 1 | 0 | 0 | 0 | 0 | 0 | hsa-miR-622 | -0.1 | N/A | Sites in UTR |
| CCDC134  | NM_024821    | coiled-coil domain containing 134                                              | 0 | 0 | 0 | 0 | 1 | 0 | 1 | 0 | hsa-miR-622 | -0.1 | N/A | Sites in UTR |
| PIK3C2B  | NM_002646    | phosphoinositide-3-kinase, class 2, beta polypeptide                           | 0 | 0 | 0 | 0 | 2 | 0 | 0 | 2 | hsa-miR-622 | -0.1 | N/A | Sites in UTR |
| ERLIN2   | NM_007175    | ER lipid raft associated 2                                                     | 0 | 0 | 0 | 0 | 1 | 0 | 0 | 1 | hsa-miR-622 | -0.1 | N/A | Sites in UTR |
| CACYBP   | NM_001007214 | calyculin binding protein                                                      | 0 | 0 | 0 | 0 | 1 | 0 | 0 | 1 | hsa-miR-622 | -0.1 | N/A | Sites in UTR |

|          |              |                                                                                  |   |   |   |   |   |   |   |   |             |      |     |              |
|----------|--------------|----------------------------------------------------------------------------------|---|---|---|---|---|---|---|---|-------------|------|-----|--------------|
| DROSHA   | NM_001100412 | drosha, ribonuclease type III                                                    | 0 | 0 | 0 | 0 | 1 | 0 | 0 | 1 | hsa-miR-622 | -0.1 | N/A | Sites in UTR |
| CLEC2D   | NM_001004419 | C-type lectin domain family 2, member D                                          | 0 | 0 | 0 | 0 | 1 | 0 | 0 | 1 | hsa-miR-622 | -0.1 | N/A | Sites in UTR |
| C7orf42  | NM_017994    | chromosome 7 open reading frame 42                                               | 0 | 0 | 0 | 0 | 1 | 0 | 0 | 1 | hsa-miR-622 | -0.1 | N/A | Sites in UTR |
| VCPIP1   | NM_025054    | valosin containing protein (p97)/p47 complex interacting protein 1               | 0 | 0 | 0 | 0 | 1 | 0 | 0 | 1 | hsa-miR-622 | -0.1 | N/A | Sites in UTR |
| SIGLEC12 | NM_033329    | sialic acid binding Ig-like lectin 12 (gene/pseudogene)                          | 0 | 0 | 0 | 0 | 1 | 0 | 0 | 1 | hsa-miR-622 | -0.1 | N/A | Sites in UTR |
| C9orf43  | NM_152786    | chromosome 9 open reading frame 43                                               | 0 | 0 | 0 | 0 | 1 | 0 | 0 | 1 | hsa-miR-622 | -0.1 | N/A | Sites in UTR |
| GRK6     | NM_001004106 | G protein-coupled receptor kinase 6                                              | 0 | 0 | 0 | 0 | 1 | 0 | 1 | 0 | hsa-miR-622 | -0.1 | N/A | Sites in UTR |
| NR3C2    | NM_000901    | nuclear receptor subfamily 3, group C, member 2                                  | 0 | 0 | 0 | 0 | 1 | 0 | 1 | 0 | hsa-miR-622 | -0.1 | N/A | Sites in UTR |
| TEAD3    | NM_003214    | TEA domain family member 3                                                       | 0 | 0 | 0 | 0 | 1 | 0 | 1 | 0 | hsa-miR-622 | -0.1 | N/A | Sites in UTR |
| TSPAN3   | NM_001168412 | tetraspanin 3                                                                    | 1 | 0 | 0 | 1 | 1 | 0 | 1 | 0 | hsa-miR-622 | -0.1 | N/A | Sites in UTR |
| DPPA4    | NM_018189    | developmental pluripotency associated 4                                          | 0 | 0 | 0 | 0 | 1 | 0 | 1 | 0 | hsa-miR-622 | -0.1 | N/A | Sites in UTR |
| WDR33    | NM_001006623 | WD repeat domain 33                                                              | 0 | 0 | 0 | 0 | 1 | 0 | 1 | 0 | hsa-miR-622 | -0.1 | N/A | Sites in UTR |
| USP47    | NM_017944    | ubiquitin specific peptidase 47                                                  | 0 | 0 | 0 | 0 | 1 | 1 | 0 | 0 | hsa-miR-622 | -0.1 | N/A | Sites in UTR |
| ITGB8    | NM_002214    | integrin, beta 8                                                                 | 0 | 0 | 0 | 0 | 2 | 0 | 0 | 2 | hsa-miR-622 | -0.1 | N/A | Sites in UTR |
| MOBK2B   | NM_024761    | MOB1, Mps One Binder kinase activator-like 2B (yeast)                            | 1 | 0 | 0 | 1 | 1 | 0 | 0 | 1 | hsa-miR-622 | -0.1 | N/A | Sites in UTR |
| MEF2D    | NM_005920    | myocyte enhancer factor 2D                                                       | 0 | 0 | 0 | 0 | 3 | 0 | 1 | 2 | hsa-miR-622 | -0.1 | N/A | Sites in UTR |
| ITGA2B   | NM_000419    | integrin, alpha 2b (platelet glycoprotein IIb of IIb/IIIa complex, antigen CD41) | 0 | 0 | 0 | 0 | 1 | 0 | 0 | 1 | hsa-miR-622 | -0.1 | N/A | Sites in UTR |
| JARID2   | NM_004973    | jumonji, AT rich interactive domain 2                                            | 1 | 0 | 0 | 1 | 0 | 0 | 0 | 0 | hsa-miR-622 | -0.1 | N/A | Sites in UTR |

|               |              |                                                        |   |   |   |   |   |   |   |   |             |      |     |              |
|---------------|--------------|--------------------------------------------------------|---|---|---|---|---|---|---|---|-------------|------|-----|--------------|
| VRTN          | NM_018228    | vertebrae development homolog (pig)                    | 0 | 0 | 0 | 0 | 1 | 0 | 0 | 1 | hsa-miR-622 | -0.1 | N/A | Sites in UTR |
| KCTD14        | NM_023930    | potassium channel tetramerisation domain containing 14 | 0 | 0 | 0 | 0 | 1 | 0 | 0 | 1 | hsa-miR-622 | -0.1 | N/A | Sites in UTR |
| EIF2A         | NM_032025    | eukaryotic translation initiation factor 2A, 65kDa     | 0 | 0 | 0 | 0 | 1 | 0 | 0 | 1 | hsa-miR-622 | -0.1 | N/A | Sites in UTR |
| TAPT1         | NM_153365    | transmembrane anterior posterior transformation 1      | 0 | 0 | 0 | 0 | 1 | 0 | 0 | 1 | hsa-miR-622 | -0.1 | N/A | Sites in UTR |
| DHRX          | NM_145177    | dehydrogenase/reductase (SDR family) X-linked          | 0 | 0 | 0 | 0 | 1 | 0 | 0 | 1 | hsa-miR-622 | -0.1 | N/A | Sites in UTR |
| NDUFC2-KCTD14 | NM_001203260 | NDUFC2-KCTD14 readthrough                              | 0 | 0 | 0 | 0 | 1 | 0 | 0 | 1 | hsa-miR-622 | -0.1 | N/A | Sites in UTR |
| EXT1          | NM_000127    | exostosin 1                                            | 0 | 0 | 0 | 0 | 1 | 0 | 1 | 0 | hsa-miR-622 | -0.1 | N/A | Sites in UTR |
| MMP11         | NM_005940    | matrix metalloproteinase 11 (stromelysin 3)            | 0 | 0 | 0 | 0 | 1 | 0 | 1 | 0 | hsa-miR-622 | -0.1 | N/A | Sites in UTR |
| SLC25A36      | NM_001104647 | solute carrier family 25, member 36                    | 0 | 0 | 0 | 0 | 1 | 0 | 1 | 0 | hsa-miR-622 | -0.1 | N/A | Sites in UTR |
| WDR76         | NM_001167941 | WD repeat domain 76                                    | 0 | 0 | 0 | 0 | 1 | 0 | 1 | 0 | hsa-miR-622 | -0.1 | N/A | Sites in UTR |
| NIPAL4        | NM_001099287 | NIPA-like domain containing 4                          | 0 | 0 | 0 | 0 | 1 | 0 | 1 | 0 | hsa-miR-622 | -0.1 | N/A | Sites in UTR |
| TRPS1         | NM_014112    | trichorhinophalangeal syndrome I                       | 1 | 1 | 0 | 0 | 0 | 0 | 0 | 0 | hsa-miR-622 | -0.1 | N/A | Sites in UTR |
| SARM1         | NM_015077    | sterile alpha and TIR motif containing 1               | 0 | 0 | 0 | 0 | 2 | 0 | 2 | 0 | hsa-miR-622 | -0.1 | N/A | Sites in UTR |
| SOX1          | NM_005986    | SRY (sex determining region Y)-box 1                   | 1 | 0 | 0 | 1 | 0 | 0 | 0 | 0 | hsa-miR-622 | -0.1 | N/A | Sites in UTR |
| LAPTM4A       | NM_014713    | lysosomal protein transmembrane 4 alpha                | 0 | 0 | 0 | 0 | 1 | 0 | 0 | 1 | hsa-miR-622 | -0.1 | N/A | Sites in UTR |
| WDR6          | NM_018031    | WD repeat domain 6                                     | 0 | 0 | 0 | 0 | 1 | 0 | 0 | 1 | hsa-miR-622 | -0.1 | N/A | Sites in UTR |
| CCDC47        | NM_020198    | coiled-coil domain containing 47                       | 0 | 0 | 0 | 0 | 1 | 0 | 0 | 1 | hsa-miR-622 | -0.1 | N/A | Sites in UTR |
| SSX2IP        | NM_001166293 | synovial sarcoma, X breakpoint 2 interacting protein   | 0 | 0 | 0 | 0 | 1 | 0 | 0 | 1 | hsa-miR-622 | -0.1 | N/A | Sites in UTR |

|         |              |                                                               |   |   |   |   |   |   |   |   |             |      |     |              |
|---------|--------------|---------------------------------------------------------------|---|---|---|---|---|---|---|---|-------------|------|-----|--------------|
| UBLCP1  | NM_145049    | ubiquitin-like domain containing CTD phosphatase 1            | 0 | 0 | 0 | 0 | 1 | 0 | 0 | 1 | hsa-miR-622 | -0.1 | N/A | Sites in UTR |
| YTHDF3  | NM_152758    | YTH domain family, member 3                                   | 0 | 0 | 0 | 0 | 1 | 0 | 0 | 1 | hsa-miR-622 | -0.1 | N/A | Sites in UTR |
| RIMKLA  | NM_173642    | ribosomal modification protein rimK-like family member A      | 0 | 0 | 0 | 0 | 1 | 0 | 0 | 1 | hsa-miR-622 | -0.1 | N/A | Sites in UTR |
| AQP6    | NM_001652    | aquaporin 6, kidney specific                                  | 0 | 0 | 0 | 0 | 1 | 0 | 1 | 0 | hsa-miR-622 | -0.1 | N/A | Sites in UTR |
| FGFR1   | NM_001174063 | fibroblast growth factor receptor 1                           | 0 | 0 | 0 | 0 | 1 | 0 | 1 | 0 | hsa-miR-622 | -0.1 | N/A | Sites in UTR |
| IL3RA   | NM_002183    | interleukin 3 receptor, alpha (low affinity)                  | 0 | 0 | 0 | 0 | 1 | 0 | 1 | 0 | hsa-miR-622 | -0.1 | N/A | Sites in UTR |
| MGLL    | NM_001003794 | monoglyceride lipase                                          | 0 | 0 | 0 | 0 | 1 | 0 | 1 | 0 | hsa-miR-622 | -0.1 | N/A | Sites in UTR |
| TBC1D9B | NM_015043    | TBC1 domain family, member 9B (with GRAM domain)              | 0 | 0 | 0 | 0 | 1 | 0 | 1 | 0 | hsa-miR-622 | -0.1 | N/A | Sites in UTR |
| PSME4   | NM_014614    | proteasome (prosome, macropain) activator subunit 4           | 0 | 0 | 0 | 0 | 1 | 0 | 1 | 0 | hsa-miR-622 | -0.1 | N/A | Sites in UTR |
| CNO     | NM_018366    | cappuccino homolog (mouse)                                    | 0 | 0 | 0 | 0 | 1 | 0 | 1 | 0 | hsa-miR-622 | -0.1 | N/A | Sites in UTR |
| DERL1   | NM_001134671 | Der1-like domain family, member 1                             | 0 | 0 | 0 | 0 | 1 | 0 | 1 | 0 | hsa-miR-622 | -0.1 | N/A | Sites in UTR |
| STK40   | NM_032017    | serine/threonine kinase 40                                    | 0 | 0 | 0 | 0 | 1 | 0 | 1 | 0 | hsa-miR-622 | -0.1 | N/A | Sites in UTR |
| UHMK1   | NM_001184763 | U2AF homology motif (UHM) kinase 1                            | 0 | 0 | 0 | 0 | 1 | 0 | 1 | 0 | hsa-miR-622 | -0.1 | N/A | Sites in UTR |
| CLDN4   | NM_001305    | claudin 4                                                     | 0 | 0 | 0 | 0 | 2 | 0 | 0 | 2 | hsa-miR-622 | -0.1 | N/A | Sites in UTR |
| SNCA    | NM_000345    | synuclein, alpha (non A4 component of amyloid precursor)      | 0 | 0 | 0 | 0 | 2 | 0 | 0 | 2 | hsa-miR-622 | -0.1 | N/A | Sites in UTR |
| KCNE3   | NM_005472    | potassium voltage-gated channel, Isk-related family, member 3 | 0 | 0 | 0 | 0 | 2 | 0 | 0 | 2 | hsa-miR-622 | -0.1 | N/A | Sites in UTR |
| MR1     | NM_001194999 | major histocompatibility complex, class I-related             | 0 | 0 | 0 | 0 | 3 | 0 | 2 | 1 | hsa-miR-622 | -0.1 | N/A | Sites in UTR |
| GTF3C2  | NM_001035521 | general transcription factor IIIC, polypeptide 2, beta 110kDa | 0 | 0 | 0 | 0 | 1 | 0 | 0 | 1 | hsa-miR-622 | -0.1 | N/A | Sites in UTR |

|           |              |                                                                    |   |   |   |   |   |   |   |   |             |      |     |              |
|-----------|--------------|--------------------------------------------------------------------|---|---|---|---|---|---|---|---|-------------|------|-----|--------------|
| HOXB4     | NM_024015    | homeobox B4                                                        | 0 | 0 | 0 | 0 | 1 | 0 | 0 | 1 | hsa-miR-622 | -0.1 | N/A | Sites in UTR |
| IL9R      | NM_002186    | interleukin 9 receptor                                             | 0 | 0 | 0 | 0 | 1 | 0 | 0 | 1 | hsa-miR-622 | -0.1 | N/A | Sites in UTR |
| MYOM2     | NM_003970    | myomesin (M-protein) 2, 165kDa                                     | 0 | 0 | 0 | 0 | 1 | 0 | 0 | 1 | hsa-miR-622 | -0.1 | N/A | Sites in UTR |
| TRAF4     | NM_004295    | TNF receptor-associated factor 4                                   | 0 | 0 | 0 | 0 | 1 | 0 | 0 | 1 | hsa-miR-622 | -0.1 | N/A | Sites in UTR |
| LYPLA1    | NM_006330    | lysophospholipase I                                                | 0 | 0 | 0 | 0 | 1 | 0 | 0 | 1 | hsa-miR-622 | -0.1 | N/A | Sites in UTR |
| SMG5      | NM_015327    | smg-5 homolog, nonsense mediated mRNA decay factor (C. elegans)    | 0 | 0 | 0 | 0 | 1 | 0 | 0 | 1 | hsa-miR-622 | -0.1 | N/A | Sites in UTR |
| TBC1D22A  | NM_014346    | TBC1 domain family, member 22A                                     | 0 | 0 | 0 | 0 | 1 | 0 | 0 | 1 | hsa-miR-622 | -0.1 | N/A | Sites in UTR |
| SYTL2     | NM_001162951 | synaptotagmin-like 2                                               | 0 | 0 | 0 | 0 | 1 | 0 | 0 | 1 | hsa-miR-622 | -0.1 | N/A | Sites in UTR |
| TMLHE     | NM_018196    | trimethyllysine hydroxylase, epsilon                               | 0 | 0 | 0 | 0 | 1 | 0 | 0 | 1 | hsa-miR-622 | -0.1 | N/A | Sites in UTR |
| UBE2Q1    | NM_017582    | ubiquitin-conjugating enzyme E2Q family member 1                   | 1 | 0 | 0 | 1 | 0 | 0 | 0 | 0 | hsa-miR-622 | -0.1 | N/A | Sites in UTR |
| RCN3      | NM_020650    | reticulocalbin 3, EF-hand calcium binding domain                   | 0 | 0 | 0 | 0 | 1 | 0 | 0 | 1 | hsa-miR-622 | -0.1 | N/A | Sites in UTR |
| CNTNAP5   | NM_130773    | contactin associated protein-like 5                                | 0 | 0 | 0 | 0 | 1 | 0 | 0 | 1 | hsa-miR-622 | -0.1 | N/A | Sites in UTR |
| LELP1     | NM_001010857 | late cornified envelope-like proline-rich 1                        | 0 | 0 | 0 | 0 | 1 | 0 | 0 | 1 | hsa-miR-622 | -0.1 | N/A | Sites in UTR |
| CHRNA4    | NM_000751    | cholinergic receptor, nicotinic, delta                             | 0 | 0 | 0 | 0 | 1 | 0 | 1 | 0 | hsa-miR-622 | -0.1 | N/A | Sites in UTR |
| TRPM5     | NM_014555    | transient receptor potential cation channel, subfamily M, member 5 | 0 | 0 | 0 | 0 | 1 | 0 | 1 | 0 | hsa-miR-622 | -0.1 | N/A | Sites in UTR |
| HDAC8     | NM_001166418 | histone deacetylase 8                                              | 0 | 0 | 0 | 0 | 1 | 0 | 1 | 0 | hsa-miR-622 | -0.1 | N/A | Sites in UTR |
| CTTNBP2NL | NM_018704    | CTTNBP2 N-terminal like                                            | 0 | 0 | 0 | 0 | 1 | 0 | 1 | 0 | hsa-miR-622 | -0.1 | N/A | Sites in UTR |
| GPAM      | NM_020918    | glycerol-3-phosphate acyltransferase, mitochondrial                | 0 | 0 | 0 | 0 | 1 | 0 | 1 | 0 | hsa-miR-622 | -0.1 | N/A | Sites in UTR |

|         |              |                                                            |   |   |   |   |   |   |   |   |             |      |     |              |
|---------|--------------|------------------------------------------------------------|---|---|---|---|---|---|---|---|-------------|------|-----|--------------|
| ZNF526  | NM_133444    | zinc finger protein 526                                    | 0 | 0 | 0 | 0 | 2 | 0 | 1 | 1 | hsa-miR-622 | -0.1 | N/A | Sites in UTR |
| RD3     | NM_001164688 | retinal degeneration 3                                     | 0 | 0 | 0 | 0 | 2 | 0 | 1 | 1 | hsa-miR-622 | -0.1 | N/A | Sites in UTR |
| STXBP4  | NM_178509    | syntaxin binding protein 4                                 | 1 | 1 | 0 | 0 | 1 | 0 | 0 | 1 | hsa-miR-622 | -0.1 | N/A | Sites in UTR |
| EHD1    | NM_006795    | EH-domain containing 1                                     | 1 | 0 | 0 | 1 | 0 | 0 | 0 | 0 | hsa-miR-622 | -0.1 | N/A | Sites in UTR |
| CUX2    | NM_015267    | cut-like homeobox 2                                        | 1 | 0 | 0 | 1 | 0 | 0 | 0 | 0 | hsa-miR-622 | -0.1 | N/A | Sites in UTR |
| DNAJC19 | NM_001190233 | Dnaj (Hsp40) homolog, subfamily C, member 19               | 0 | 0 | 0 | 0 | 1 | 0 | 0 | 1 | hsa-miR-622 | -0.1 | N/A | Sites in UTR |
| CC2D1B  | NM_032449    | coiled-coil and C2 domain containing 1B                    | 0 | 0 | 0 | 0 | 1 | 0 | 0 | 1 | hsa-miR-622 | -0.1 | N/A | Sites in UTR |
| VSTM2B  | NM_001146339 | V-set and transmembrane domain containing 2B               | 0 | 0 | 0 | 0 | 1 | 0 | 0 | 1 | hsa-miR-622 | -0.1 | N/A | Sites in UTR |
| PKIA    | NM_006823    | protein kinase (cAMP-dependent, catalytic) inhibitor alpha | 0 | 0 | 0 | 0 | 1 | 0 | 1 | 0 | hsa-miR-622 | -0.1 | N/A | Sites in UTR |
| SYNJ2   | NM_001178088 | synaptojanin 2                                             | 0 | 0 | 0 | 0 | 1 | 0 | 1 | 0 | hsa-miR-622 | -0.1 | N/A | Sites in UTR |
| MAP3K13 | NM_001242314 | mitogen-activated protein kinase kinase kinase 13          | 0 | 0 | 0 | 0 | 1 | 0 | 1 | 0 | hsa-miR-622 | -0.1 | N/A | Sites in UTR |
| URGCP   | NM_001077663 | upregulator of cell proliferation                          | 0 | 0 | 0 | 0 | 1 | 0 | 1 | 0 | hsa-miR-622 | -0.1 | N/A | Sites in UTR |
| SHF     | NM_138356    | Src homology 2 domain containing F                         | 0 | 0 | 0 | 0 | 1 | 0 | 1 | 0 | hsa-miR-622 | -0.1 | N/A | Sites in UTR |
| UBN2    | NM_173569    | ubiquitin 2                                                | 0 | 0 | 0 | 0 | 2 | 1 | 1 | 0 | hsa-miR-622 | -0.1 | N/A | Sites in UTR |
| IRF4    | NM_001195286 | interferon regulatory factor 4                             | 0 | 0 | 0 | 0 | 2 | 0 | 1 | 1 | hsa-miR-622 | -0.1 | N/A | Sites in UTR |
| FAM126B | NM_173822    | family with sequence similarity 126, member B              | 1 | 0 | 0 | 1 | 1 | 0 | 0 | 1 | hsa-miR-622 | -0.1 | N/A | Sites in UTR |
| TBCC    | NM_003192    | tubulin folding cofactor C                                 | 0 | 0 | 0 | 0 | 1 | 0 | 0 | 1 | hsa-miR-622 | -0.1 | N/A | Sites in UTR |
| ENDOU   | NM_001172439 | endonuclease, polyU-specific                               | 0 | 0 | 0 | 0 | 1 | 0 | 0 | 1 | hsa-miR-622 | -0.1 | N/A | Sites in UTR |

|         |              |                                                                       |   |   |   |   |   |   |   |   |             |      |     |              |
|---------|--------------|-----------------------------------------------------------------------|---|---|---|---|---|---|---|---|-------------|------|-----|--------------|
| RPS6KA6 | NM_014496    | ribosomal protein S6 kinase, 90kDa, polypeptide 6                     | 0 | 0 | 0 | 0 | 1 | 0 | 0 | 1 | hsa-miR-622 | -0.1 | N/A | Sites in UTR |
| NXP1    | NM_152745    | neurexophilin 1                                                       | 0 | 0 | 0 | 0 | 1 | 0 | 0 | 1 | hsa-miR-622 | -0.1 | N/A | Sites in UTR |
| SCYL2   | NM_017988    | SCY1-like 2 ( <i>S. cerevisiae</i> )                                  | 0 | 0 | 0 | 0 | 1 | 0 | 0 | 1 | hsa-miR-622 | -0.1 | N/A | Sites in UTR |
| ZNF395  | NM_018660    | zinc finger protein 395                                               | 0 | 0 | 0 | 0 | 1 | 0 | 0 | 1 | hsa-miR-622 | -0.1 | N/A | Sites in UTR |
| CHCHD7  | NM_001011667 | coiled-coil-helix-coiled-coil-helix domain containing 7               | 0 | 0 | 0 | 0 | 1 | 0 | 0 | 1 | hsa-miR-622 | -0.1 | N/A | Sites in UTR |
| KIRREL3 | NM_001161707 | kin of IRRE like 3 ( <i>Drosophila</i> )                              | 0 | 0 | 0 | 0 | 1 | 0 | 0 | 1 | hsa-miR-622 | -0.1 | N/A | Sites in UTR |
| PTGR2   | NM_001146154 | prostaglandin reductase 2                                             | 0 | 0 | 0 | 0 | 1 | 0 | 0 | 1 | hsa-miR-622 | -0.1 | N/A | Sites in UTR |
| FAM116A | NM_152678    | family with sequence similarity 116, member A                         | 0 | 0 | 0 | 0 | 1 | 0 | 0 | 1 | hsa-miR-622 | -0.1 | N/A | Sites in UTR |
| ZCCHC5  | NM_152694    | zinc finger, CCHC domain containing 5                                 | 0 | 0 | 0 | 0 | 1 | 0 | 0 | 1 | hsa-miR-622 | -0.1 | N/A | Sites in UTR |
| CSF1R   | NM_005211    | colony stimulating factor 1 receptor                                  | 0 | 0 | 0 | 0 | 1 | 0 | 1 | 0 | hsa-miR-622 | -0.1 | N/A | Sites in UTR |
| GNG4    | NM_001098721 | guanine nucleotide binding protein (G protein), gamma 4               | 0 | 0 | 0 | 0 | 1 | 0 | 1 | 0 | hsa-miR-622 | -0.1 | N/A | Sites in UTR |
| MCL1    | NM_001197320 | myeloid cell leukemia sequence 1 (BCL2-related)                       | 0 | 0 | 0 | 0 | 1 | 0 | 1 | 0 | hsa-miR-622 | -0.1 | N/A | Sites in UTR |
| RGS16   | NM_002928    | regulator of G-protein signaling 16                                   | 0 | 0 | 0 | 0 | 1 | 0 | 1 | 0 | hsa-miR-622 | -0.1 | N/A | Sites in UTR |
| GPR161  | NM_153832    | G protein-coupled receptor 161                                        | 0 | 0 | 0 | 0 | 1 | 0 | 1 | 0 | hsa-miR-622 | -0.1 | N/A | Sites in UTR |
| GGA1    | NM_001001561 | golgi-associated, gamma adaptin ear containing, ARF binding protein 1 | 0 | 0 | 0 | 0 | 1 | 0 | 1 | 0 | hsa-miR-622 | -0.1 | N/A | Sites in UTR |
| STIM2   | NM_001169117 | stromal interaction molecule 2                                        | 1 | 0 | 1 | 0 | 0 | 0 | 0 | 0 | hsa-miR-622 | -0.1 | N/A | Sites in UTR |
| RNF26   | NM_032015    | ring finger protein 26                                                | 0 | 0 | 0 | 0 | 1 | 0 | 1 | 0 | hsa-miR-622 | -0.1 | N/A | Sites in UTR |
| NSUN7   | NM_024677    | NOP2/Sun domain family, member 7                                      | 0 | 0 | 0 | 0 | 1 | 0 | 1 | 0 | hsa-miR-622 | -0.1 | N/A | Sites in UTR |

|          |              |                                                                                       |   |   |   |   |   |   |   |   |             |      |     |              |
|----------|--------------|---------------------------------------------------------------------------------------|---|---|---|---|---|---|---|---|-------------|------|-----|--------------|
| TMEM41A  | NM_080652    | transmembrane protein 41A                                                             | 0 | 0 | 0 | 0 | 1 | 0 | 1 | 0 | hsa-miR-622 | -0.1 | N/A | Sites in UTR |
| WDR88    | NM_173479    | WD repeat domain 88                                                                   | 0 | 0 | 0 | 0 | 1 | 0 | 1 | 0 | hsa-miR-622 | -0.1 | N/A | Sites in UTR |
| TMEM150C | NM_001080506 | transmembrane protein 150C                                                            | 0 | 0 | 0 | 0 | 1 | 0 | 1 | 0 | hsa-miR-622 | -0.1 | N/A | Sites in UTR |
| PAIP2B   | NM_020459    | poly(A) binding protein interacting protein 2B                                        | 0 | 0 | 0 | 0 | 2 | 0 | 2 | 0 | hsa-miR-622 | -0.1 | N/A | Sites in UTR |
| PPP1R16B | NM_001172735 | protein phosphatase 1, regulatory (inhibitor) subunit 16B                             | 0 | 0 | 0 | 0 | 4 | 1 | 2 | 1 | hsa-miR-622 | -0.1 | N/A | Sites in UTR |
| LAD1     | NM_005558    | ladinin 1                                                                             | 0 | 0 | 0 | 0 | 1 | 0 | 0 | 1 | hsa-miR-622 | -0.1 | N/A | Sites in UTR |
| NFKBIE   | NM_004556    | nuclear factor of kappa light polypeptide gene enhancer in B-cells inhibitor, epsilon | 0 | 0 | 0 | 0 | 1 | 0 | 0 | 1 | hsa-miR-622 | -0.1 | N/A | Sites in UTR |
| SRP72    | NM_006947    | signal recognition particle 72kDa                                                     | 0 | 0 | 0 | 0 | 1 | 0 | 0 | 1 | hsa-miR-622 | -0.1 | N/A | Sites in UTR |
| TMEM216  | NM_001173990 | transmembrane protein 216                                                             | 0 | 0 | 0 | 0 | 1 | 0 | 0 | 1 | hsa-miR-622 | -0.1 | N/A | Sites in UTR |
| ARV1     | NM_022786    | ARV1 homolog ( <i>S. cerevisiae</i> )                                                 | 0 | 0 | 0 | 0 | 1 | 0 | 0 | 1 | hsa-miR-622 | -0.1 | N/A | Sites in UTR |
| TTC39B   | NM_001168339 | tetratricopeptide repeat domain 39B                                                   | 0 | 0 | 0 | 0 | 1 | 0 | 0 | 1 | hsa-miR-622 | -0.1 | N/A | Sites in UTR |
| MC1R     | NM_002386    | melanocortin 1 receptor (alpha melanocyte stimulating hormone receptor)               | 0 | 0 | 0 | 0 | 1 | 0 | 1 | 0 | hsa-miR-622 | -0.1 | N/A | Sites in UTR |
| SUMO3    | NM_006936    | SMT3 suppressor of mif two 3 homolog 3 ( <i>S. cerevisiae</i> )                       | 0 | 0 | 0 | 0 | 1 | 0 | 1 | 0 | hsa-miR-622 | -0.1 | N/A | Sites in UTR |
| HCAR3    | NM_006018    | hydroxycarboxylic acid receptor 3                                                     | 0 | 0 | 0 | 0 | 1 | 0 | 1 | 0 | hsa-miR-622 | -0.1 | N/A | Sites in UTR |
| BATF     | NM_006399    | basic leucine zipper transcription factor, ATF-like                                   | 0 | 0 | 0 | 0 | 1 | 0 | 1 | 0 | hsa-miR-622 | -0.1 | N/A | Sites in UTR |
| TNRC6C   | NM_001142640 | trinucleotide repeat containing 6C                                                    | 0 | 0 | 0 | 0 | 1 | 0 | 1 | 0 | hsa-miR-622 | -0.1 | N/A | Sites in UTR |
| CDC45    | NM_080668    | cell division cycle associated 5                                                      | 0 | 0 | 0 | 0 | 1 | 0 | 1 | 0 | hsa-miR-622 | -0.1 | N/A | Sites in UTR |
| FAM155B  | NM_015686    | family with sequence similarity 155, member B                                         | 0 | 0 | 0 | 0 | 1 | 1 | 0 | 0 | hsa-miR-622 | -0.1 | N/A | Sites in UTR |



|         |              |                                                                       |   |   |   |   |   |   |   |   |             |       |     |              |
|---------|--------------|-----------------------------------------------------------------------|---|---|---|---|---|---|---|---|-------------|-------|-----|--------------|
| GTF2H5  | NM_207118    | general transcription factor IIH, polypeptide 5                       | 0 | 0 | 0 | 0 | 2 | 0 | 0 | 2 | hsa-miR-622 | -0.09 | N/A | Sites in UTR |
| RDX     | NM_002906    | radixin                                                               | 0 | 0 | 0 | 0 | 1 | 0 | 0 | 1 | hsa-miR-622 | -0.09 | N/A | Sites in UTR |
| EIF2B5  | NM_003907    | eukaryotic translation initiation factor 2B, subunit 5 epsilon, 82kDa | 0 | 0 | 0 | 0 | 1 | 0 | 0 | 1 | hsa-miR-622 | -0.09 | N/A | Sites in UTR |
| SPG20   | NM_001142294 | spastic paraplegia 20 (Troyer syndrome)                               | 0 | 0 | 0 | 0 | 1 | 0 | 0 | 1 | hsa-miR-622 | -0.09 | N/A | Sites in UTR |
| RBM22   | NM_018047    | RNA binding motif protein 22                                          | 0 | 0 | 0 | 0 | 1 | 0 | 0 | 1 | hsa-miR-622 | -0.09 | N/A | Sites in UTR |
| SCYL3   | NM_020423    | SCY1-like 3 ( <i>S. cerevisiae</i> )                                  | 0 | 0 | 0 | 0 | 1 | 0 | 0 | 1 | hsa-miR-622 | -0.09 | N/A | Sites in UTR |
| CDK16   | NM_001170460 | cyclin-dependent kinase 16                                            | 0 | 0 | 0 | 0 | 1 | 0 | 1 | 0 | hsa-miR-622 | -0.09 | N/A | Sites in UTR |
| MAPK3   | NM_001040056 | mitogen-activated protein kinase 3                                    | 0 | 0 | 0 | 0 | 1 | 0 | 1 | 0 | hsa-miR-622 | -0.09 | N/A | Sites in UTR |
| TFF3    | NM_003226    | trefoil factor 3 (intestinal)                                         | 0 | 0 | 0 | 0 | 1 | 0 | 1 | 0 | hsa-miR-622 | -0.09 | N/A | Sites in UTR |
| MTMR3   | NM_021090    | myotubularin related protein 3                                        | 0 | 0 | 0 | 0 | 1 | 0 | 1 | 0 | hsa-miR-622 | -0.09 | N/A | Sites in UTR |
| FAM82B  | NM_016033    | family with sequence similarity 82, member B                          | 0 | 0 | 0 | 0 | 1 | 0 | 1 | 0 | hsa-miR-622 | -0.09 | N/A | Sites in UTR |
| KANK4   | NM_181712    | KN motif and ankyrin repeat domains 4                                 | 0 | 0 | 0 | 0 | 1 | 0 | 1 | 0 | hsa-miR-622 | -0.09 | N/A | Sites in UTR |
| FKRP    | NM_001039885 | fukutin related protein                                               | 0 | 0 | 0 | 0 | 2 | 0 | 1 | 1 | hsa-miR-622 | -0.09 | N/A | Sites in UTR |
| IRS1    | NM_005544    | insulin receptor substrate 1                                          | 0 | 0 | 0 | 0 | 2 | 0 | 2 | 0 | hsa-miR-622 | -0.09 | N/A | Sites in UTR |
| GJC1    | NM_001080383 | gap junction protein, gamma 1, 45kDa                                  | 0 | 0 | 0 | 0 | 3 | 0 | 1 | 2 | hsa-miR-622 | -0.09 | N/A | Sites in UTR |
| POLR3F  | NM_006466    | polymerase (RNA) III (DNA directed) polypeptide F, 39 kDa             | 0 | 0 | 0 | 0 | 1 | 0 | 0 | 1 | hsa-miR-622 | -0.09 | N/A | Sites in UTR |
| INTS7   | NM_001199809 | integrator complex subunit 7                                          | 0 | 0 | 0 | 0 | 1 | 0 | 0 | 1 | hsa-miR-622 | -0.09 | N/A | Sites in UTR |
| PIP4K2C | NM_001146258 | phosphatidylinositol-5-phosphate 4-kinase, type II, gamma             | 0 | 0 | 0 | 0 | 1 | 0 | 0 | 1 | hsa-miR-622 | -0.09 | N/A | Sites in UTR |

|          |              |                                                                       |   |   |   |   |   |   |   |   |             |       |     |              |
|----------|--------------|-----------------------------------------------------------------------|---|---|---|---|---|---|---|---|-------------|-------|-----|--------------|
| LEPR     | NM_001003679 | leptin receptor                                                       | 0 | 0 | 0 | 0 | 1 | 0 | 1 | 0 | hsa-miR-622 | -0.09 | N/A | Sites in UTR |
| WFS1     | NM_001145853 | Wolfram syndrome 1 (wolframin)                                        | 0 | 0 | 0 | 0 | 1 | 0 | 1 | 0 | hsa-miR-622 | -0.09 | N/A | Sites in UTR |
| SERF1A   | NM_021967    | small EDRK-rich factor 1A (telomeric)                                 | 0 | 0 | 0 | 0 | 1 | 0 | 1 | 0 | hsa-miR-622 | -0.09 | N/A | Sites in UTR |
| KIAA1024 | NM_015206    | KIAA1024                                                              | 0 | 0 | 0 | 0 | 1 | 0 | 1 | 0 | hsa-miR-622 | -0.09 | N/A | Sites in UTR |
| CTDNEP1  | NM_001143775 | CTD nuclear envelope phosphatase 1                                    | 1 | 0 | 1 | 0 | 0 | 0 | 0 | 0 | hsa-miR-622 | -0.09 | N/A | Sites in UTR |
| SYT9     | NM_175733    | synaptotagmin IX                                                      | 0 | 0 | 0 | 0 | 1 | 0 | 1 | 0 | hsa-miR-622 | -0.09 | N/A | Sites in UTR |
| ZNF773   | NM_198542    | zinc finger protein 773                                               | 0 | 0 | 0 | 0 | 1 | 0 | 1 | 0 | hsa-miR-622 | -0.09 | N/A | Sites in UTR |
| SERF1B   | NM_022978    | small EDRK-rich factor 1B (centromeric)                               | 0 | 0 | 0 | 0 | 1 | 0 | 1 | 0 | hsa-miR-622 | -0.09 | N/A | Sites in UTR |
| CYP11B1  | NM_000497    | cytochrome P450, family 11, subfamily B, polypeptide 1                | 0 | 0 | 0 | 0 | 2 | 0 | 2 | 0 | hsa-miR-622 | -0.09 | N/A | Sites in UTR |
| IRF6     | NM_001206696 | interferon regulatory factor 6                                        | 0 | 0 | 0 | 0 | 2 | 0 | 0 | 2 | hsa-miR-622 | -0.09 | N/A | Sites in UTR |
| KSR2     | NM_173598    | kinase suppressor of ras 2                                            | 0 | 0 | 0 | 0 | 2 | 0 | 2 | 0 | hsa-miR-622 | -0.09 | N/A | Sites in UTR |
| KIF2A    | NM_001098511 | kinesin heavy chain member 2A                                         | 0 | 0 | 0 | 0 | 1 | 0 | 0 | 1 | hsa-miR-622 | -0.09 | N/A | Sites in UTR |
| POU2AF1  | NM_006235    | POU class 2 associating factor 1                                      | 0 | 0 | 0 | 0 | 1 | 0 | 0 | 1 | hsa-miR-622 | -0.09 | N/A | Sites in UTR |
| ARHGEF10 | NM_014629    | Rho guanine nucleotide exchange factor (GEF) 10                       | 0 | 0 | 0 | 0 | 1 | 0 | 0 | 1 | hsa-miR-622 | -0.09 | N/A | Sites in UTR |
| NDUFAF4  | NM_014165    | NADH dehydrogenase (ubiquinone) 1 alpha subcomplex, assembly factor 4 | 0 | 0 | 0 | 0 | 1 | 0 | 0 | 1 | hsa-miR-622 | -0.09 | N/A | Sites in UTR |
| TTC26    | NM_001144920 | tetratricopeptide repeat domain 26                                    | 0 | 0 | 0 | 0 | 1 | 0 | 0 | 1 | hsa-miR-622 | -0.09 | N/A | Sites in UTR |
| IRX2     | NM_033267    | iroquois homeobox 2                                                   | 0 | 0 | 0 | 0 | 1 | 0 | 0 | 1 | hsa-miR-622 | -0.09 | N/A | Sites in UTR |
| VWA3B    | NM_144992    | von Willebrand factor A domain containing 3B                          | 0 | 0 | 0 | 0 | 1 | 0 | 0 | 1 | hsa-miR-622 | -0.09 | N/A | Sites in UTR |

|          |              |                                                        |   |   |   |   |   |   |   |   |             |       |     |              |
|----------|--------------|--------------------------------------------------------|---|---|---|---|---|---|---|---|-------------|-------|-----|--------------|
| NHLRC2   | NM_198514    | NHL repeat containing 2                                | 0 | 0 | 0 | 0 | 1 | 0 | 0 | 1 | hsa-miR-622 | -0.09 | N/A | Sites in UTR |
| FAM49A   | NM_030797    | family with sequence similarity 49, member A           | 0 | 0 | 0 | 0 | 1 | 0 | 1 | 0 | hsa-miR-622 | -0.09 | N/A | Sites in UTR |
| CYP4F11  | NM_001128932 | cytochrome P450, family 4, subfamily F, polypeptide 11 | 0 | 0 | 0 | 0 | 2 | 0 | 1 | 1 | hsa-miR-622 | -0.09 | N/A | Sites in UTR |
| GOSR1    | NM_001007024 | golgi SNAP receptor complex member 1                   | 0 | 0 | 0 | 0 | 2 | 0 | 0 | 2 | hsa-miR-622 | -0.09 | N/A | Sites in UTR |
| CGNL1    | NM_032866    | cingulin-like 1                                        | 0 | 0 | 0 | 0 | 2 | 0 | 0 | 2 | hsa-miR-622 | -0.09 | N/A | Sites in UTR |
| C8orf33  | NM_023080    | chromosome 8 open reading frame 33                     | 0 | 0 | 0 | 0 | 2 | 0 | 1 | 1 | hsa-miR-622 | -0.09 | N/A | Sites in UTR |
| EIF5AL1  | NM_001099692 | eukaryotic translation initiation factor 5A-like 1     | 0 | 0 | 0 | 0 | 2 | 0 | 1 | 1 | hsa-miR-622 | -0.09 | N/A | Sites in UTR |
| FOSB     | NM_001114171 | FBJ murine osteosarcoma viral oncogene homolog B       | 0 | 0 | 0 | 0 | 1 | 0 | 0 | 1 | hsa-miR-622 | -0.09 | N/A | Sites in UTR |
| ZNF41    | NM_007130    | zinc finger protein 41                                 | 0 | 0 | 0 | 0 | 1 | 0 | 0 | 1 | hsa-miR-622 | -0.09 | N/A | Sites in UTR |
| DNPEP    | NM_012100    | aspartyl aminopeptidase                                | 0 | 0 | 0 | 0 | 1 | 0 | 0 | 1 | hsa-miR-622 | -0.09 | N/A | Sites in UTR |
| PLA2G3   | NM_015715    | phospholipase A2, group III                            | 0 | 0 | 0 | 0 | 1 | 0 | 0 | 1 | hsa-miR-622 | -0.09 | N/A | Sites in UTR |
| ZNF770   | NM_014106    | zinc finger protein 770                                | 0 | 0 | 0 | 0 | 1 | 0 | 0 | 1 | hsa-miR-622 | -0.09 | N/A | Sites in UTR |
| SELRC1   | NM_023077    | Sel1 repeat containing 1                               | 0 | 0 | 0 | 0 | 1 | 0 | 0 | 1 | hsa-miR-622 | -0.09 | N/A | Sites in UTR |
| ALPK1    | NM_001102406 | alpha-kinase 1                                         | 0 | 0 | 0 | 0 | 1 | 0 | 0 | 1 | hsa-miR-622 | -0.09 | N/A | Sites in UTR |
| RNASEH2C | NM_032193    | ribonuclease H2, subunit C                             | 0 | 0 | 0 | 0 | 1 | 0 | 0 | 1 | hsa-miR-622 | -0.09 | N/A | Sites in UTR |
| CXCR5    | NM_001716    | chemokine (C-X-C motif) receptor 5                     | 0 | 0 | 0 | 0 | 1 | 0 | 1 | 0 | hsa-miR-622 | -0.09 | N/A | Sites in UTR |
| GRAP     | NM_006613    | GRB2-related adaptor protein                           | 0 | 0 | 0 | 0 | 1 | 0 | 1 | 0 | hsa-miR-622 | -0.09 | N/A | Sites in UTR |
| KIAA1715 | NM_030650    | KIAA1715                                               | 0 | 0 | 0 | 0 | 1 | 0 | 1 | 0 | hsa-miR-622 | -0.09 | N/A | Sites in UTR |

|          |              |                                                       |   |   |   |   |   |   |   |   |             |       |     |              |
|----------|--------------|-------------------------------------------------------|---|---|---|---|---|---|---|---|-------------|-------|-----|--------------|
| TDRD10   | NM_001098475 | tudor domain containing 10                            | 0 | 0 | 0 | 0 | 1 | 0 | 1 | 0 | hsa-miR-622 | -0.09 | N/A | Sites in UTR |
| IGLON5   | NM_001101372 | IgLON family member 5                                 | 0 | 0 | 0 | 0 | 1 | 0 | 1 | 0 | hsa-miR-622 | -0.09 | N/A | Sites in UTR |
| ZFP3     | NM_153018    | zinc finger protein 3 homolog (mouse)                 | 1 | 1 | 0 | 0 | 0 | 0 | 0 | 0 | hsa-miR-622 | -0.09 | N/A | Sites in UTR |
| MTX3     | NM_001010891 | metaxin 3                                             | 0 | 0 | 0 | 0 | 2 | 1 | 1 | 0 | hsa-miR-622 | -0.09 | N/A | Sites in UTR |
| CSTB     | NM_000100    | cystatin B (stefin B)                                 | 0 | 0 | 0 | 0 | 1 | 0 | 0 | 1 | hsa-miR-622 | -0.09 | N/A | Sites in UTR |
| HPS1     | NM_000195    | Hermansky-Pudlak syndrome 1                           | 0 | 0 | 0 | 0 | 1 | 0 | 0 | 1 | hsa-miR-622 | -0.09 | N/A | Sites in UTR |
| MYL1     | NM_079420    | myosin, light chain 1, alkali; skeletal, fast         | 0 | 0 | 0 | 0 | 1 | 0 | 0 | 1 | hsa-miR-622 | -0.09 | N/A | Sites in UTR |
| FILIP1L  | NM_001042459 | filamin A interacting protein 1-like                  | 0 | 0 | 0 | 0 | 1 | 0 | 0 | 1 | hsa-miR-622 | -0.09 | N/A | Sites in UTR |
| KLHDC5   | NM_020782    | kelch domain containing 5                             | 0 | 0 | 0 | 0 | 1 | 0 | 0 | 1 | hsa-miR-622 | -0.09 | N/A | Sites in UTR |
| C13orf18 | NM_025113    | chromosome 13 open reading frame 18                   | 0 | 0 | 0 | 0 | 1 | 0 | 0 | 1 | hsa-miR-622 | -0.09 | N/A | Sites in UTR |
| L3MBTL2  | NM_031488    | l(3)mbt-like 2 (Drosophila)                           | 0 | 0 | 0 | 0 | 1 | 0 | 0 | 1 | hsa-miR-622 | -0.09 | N/A | Sites in UTR |
| RCSD1    | NM_052862    | RCSD domain containing 1                              | 0 | 0 | 0 | 0 | 1 | 0 | 0 | 1 | hsa-miR-622 | -0.09 | N/A | Sites in UTR |
| PRR20A   | NM_198441    | proline rich 20A                                      | 0 | 0 | 0 | 0 | 1 | 0 | 0 | 1 | hsa-miR-622 | -0.09 | N/A | Sites in UTR |
| KIF19    | NM_153209    | kinesin family member 19                              | 0 | 0 | 0 | 0 | 1 | 0 | 0 | 1 | hsa-miR-622 | -0.09 | N/A | Sites in UTR |
| EME1     | NM_001166131 | essential meiotic endonuclease 1 homolog 1 (S. pombe) | 0 | 0 | 0 | 0 | 1 | 0 | 0 | 1 | hsa-miR-622 | -0.09 | N/A | Sites in UTR |
| CA13     | NM_198584    | carbonic anhydrase XIII                               | 0 | 0 | 0 | 0 | 1 | 0 | 0 | 1 | hsa-miR-622 | -0.09 | N/A | Sites in UTR |
| PRR20B   | NM_001130404 | proline rich 20B                                      | 0 | 0 | 0 | 0 | 1 | 0 | 0 | 1 | hsa-miR-622 | -0.09 | N/A | Sites in UTR |
| PRR20C   | NM_001130405 | proline rich 20C                                      | 0 | 0 | 0 | 0 | 1 | 0 | 0 | 1 | hsa-miR-622 | -0.09 | N/A | Sites in UTR |

|         |              |                                                             |   |   |   |   |   |   |   |   |             |       |     |              |
|---------|--------------|-------------------------------------------------------------|---|---|---|---|---|---|---|---|-------------|-------|-----|--------------|
| PRR20D  | NM_001130406 | proline rich 20D                                            | 0 | 0 | 0 | 0 | 1 | 0 | 0 | 1 | hsa-miR-622 | -0.09 | N/A | Sites in UTR |
| PRR20E  | NM_001130407 | proline rich 20E                                            | 0 | 0 | 0 | 0 | 1 | 0 | 0 | 1 | hsa-miR-622 | -0.09 | N/A | Sites in UTR |
| CHRNA2  | NM_000742    | cholinergic receptor, nicotinic, alpha 2 (neuronal)         | 0 | 0 | 0 | 0 | 1 | 0 | 1 | 0 | hsa-miR-622 | -0.09 | N/A | Sites in UTR |
| E2F4    | NM_001950    | E2F transcription factor 4, p107/p130-binding               | 1 | 0 | 1 | 0 | 0 | 0 | 0 | 0 | hsa-miR-622 | -0.09 | N/A | Sites in UTR |
| H2AFX   | NM_002105    | H2A histone family, member X                                | 0 | 0 | 0 | 0 | 1 | 0 | 1 | 0 | hsa-miR-622 | -0.09 | N/A | Sites in UTR |
| IL12RB1 | NM_153701    | interleukin 12 receptor, beta 1                             | 0 | 0 | 0 | 0 | 1 | 0 | 1 | 0 | hsa-miR-622 | -0.09 | N/A | Sites in UTR |
| AMOTL1  | NM_130847    | angiominin like 1                                           | 0 | 0 | 0 | 0 | 1 | 0 | 1 | 0 | hsa-miR-622 | -0.09 | N/A | Sites in UTR |
| TREML4  | NM_198153    | triggering receptor expressed on myeloid cells-like 4       | 0 | 0 | 0 | 0 | 1 | 0 | 1 | 0 | hsa-miR-622 | -0.09 | N/A | Sites in UTR |
| SNX27   | NM_030918    | sorting nexin family member 27                              | 0 | 0 | 0 | 0 | 4 | 0 | 1 | 3 | hsa-miR-622 | -0.09 | N/A | Sites in UTR |
| NQO1    | NM_000903    | NAD(P)H dehydrogenase, quinone 1                            | 0 | 0 | 0 | 0 | 1 | 0 | 0 | 1 | hsa-miR-622 | -0.09 | N/A | Sites in UTR |
| RRP1    | NM_003683    | ribosomal RNA processing 1 homolog ( <i>S. cerevisiae</i> ) | 0 | 0 | 0 | 0 | 1 | 0 | 0 | 1 | hsa-miR-622 | -0.09 | N/A | Sites in UTR |
| CLDN2   | NM_001171092 | claudin 2                                                   | 0 | 0 | 0 | 0 | 1 | 0 | 0 | 1 | hsa-miR-622 | -0.09 | N/A | Sites in UTR |
| SART3   | NM_014706    | squamous cell carcinoma antigen recognized by T cells 3     | 0 | 0 | 0 | 0 | 1 | 0 | 0 | 1 | hsa-miR-622 | -0.09 | N/A | Sites in UTR |
| PHB2    | NM_001144831 | prohibitin 2                                                | 0 | 0 | 0 | 0 | 1 | 0 | 0 | 1 | hsa-miR-622 | -0.09 | N/A | Sites in UTR |
| LIMCH1  | NM_001112717 | LIM and calponin homology domains 1                         | 0 | 0 | 0 | 0 | 1 | 0 | 0 | 1 | hsa-miR-622 | -0.09 | N/A | Sites in UTR |
| FBXL3   | NM_012158    | F-box and leucine-rich repeat protein 3                     | 0 | 0 | 0 | 0 | 1 | 0 | 0 | 1 | hsa-miR-622 | -0.09 | N/A | Sites in UTR |
| CMPK1   | NM_001136140 | cytidine monophosphate (UMP-CMP) kinase 1, cytosolic        | 0 | 0 | 0 | 0 | 1 | 0 | 0 | 1 | hsa-miR-622 | -0.09 | N/A | Sites in UTR |
| APOBR   | NM_018690    | apolipoprotein B receptor                                   | 0 | 0 | 0 | 0 | 1 | 0 | 0 | 1 | hsa-miR-622 | -0.09 | N/A | Sites in UTR |

|           |              |                                                                      |   |   |   |   |   |   |   |   |             |       |     |              |
|-----------|--------------|----------------------------------------------------------------------|---|---|---|---|---|---|---|---|-------------|-------|-----|--------------|
| SIPA1L2   | NM_020808    | signal-induced proliferation-associated 1 like 2                     | 0 | 0 | 0 | 0 | 1 | 0 | 0 | 1 | hsa-miR-622 | -0.09 | N/A | Sites in UTR |
| LOC253044 | NM_001242772 | hypothetical protein LOC253044                                       | 0 | 0 | 0 | 0 | 1 | 0 | 0 | 1 | hsa-miR-622 | -0.09 | N/A | Sites in UTR |
| DRD2      | NM_000795    | dopamine receptor D2                                                 | 0 | 0 | 0 | 0 | 1 | 0 | 1 | 0 | hsa-miR-622 | -0.09 | N/A | Sites in UTR |
| GABRE     | NM_004961    | gamma-aminobutyric acid (GABA) A receptor, epsilon                   | 0 | 0 | 0 | 0 | 1 | 0 | 1 | 0 | hsa-miR-622 | -0.09 | N/A | Sites in UTR |
| GRIA3     | NM_000828    | glutamate receptor, ionotropic, AMPA 3                               | 0 | 0 | 0 | 0 | 1 | 0 | 1 | 0 | hsa-miR-622 | -0.09 | N/A | Sites in UTR |
| ZNF142    | NM_001105537 | zinc finger protein 142                                              | 0 | 0 | 0 | 0 | 1 | 0 | 1 | 0 | hsa-miR-622 | -0.09 | N/A | Sites in UTR |
| DAP3      | NM_001199849 | death associated protein 3                                           | 0 | 0 | 0 | 0 | 1 | 0 | 1 | 0 | hsa-miR-622 | -0.09 | N/A | Sites in UTR |
| YKT6      | NM_006555    | YKT6 v-SNARE homolog ( <i>S. cerevisiae</i> )                        | 0 | 0 | 0 | 0 | 1 | 0 | 1 | 0 | hsa-miR-622 | -0.09 | N/A | Sites in UTR |
| POGZ      | NM_001194937 | pogo transposable element with ZNF domain                            | 0 | 0 | 0 | 0 | 1 | 0 | 1 | 0 | hsa-miR-622 | -0.09 | N/A | Sites in UTR |
| PPPDE1    | NM_016076    | PPPDE peptidase domain containing 1                                  | 0 | 0 | 0 | 0 | 1 | 0 | 1 | 0 | hsa-miR-622 | -0.09 | N/A | Sites in UTR |
| TBC1D22B  | NM_017772    | TBC1 domain family, member 22B                                       | 1 | 0 | 1 | 0 | 0 | 0 | 0 | 0 | hsa-miR-622 | -0.09 | N/A | Sites in UTR |
| RNF126    | NM_194460    | ring finger protein 126                                              | 0 | 0 | 0 | 0 | 1 | 0 | 1 | 0 | hsa-miR-622 | -0.09 | N/A | Sites in UTR |
| AEN       | NM_022767    | apoptosis enhancing nuclease                                         | 0 | 0 | 0 | 0 | 1 | 0 | 1 | 0 | hsa-miR-622 | -0.09 | N/A | Sites in UTR |
| SLC2A11   | NM_001024938 | solute carrier family 2 (facilitated glucose transporter), member 11 | 0 | 0 | 0 | 0 | 1 | 0 | 1 | 0 | hsa-miR-622 | -0.09 | N/A | Sites in UTR |
| MRPS25    | NM_022497    | mitochondrial ribosomal protein S25                                  | 1 | 0 | 0 | 1 | 1 | 0 | 0 | 1 | hsa-miR-622 | -0.09 | N/A | Sites in UTR |
| PFKFB2    | NM_006212    | 6-phosphofructo-2-kinase/fructose-2,6-biphosphatase 2                | 0 | 0 | 0 | 0 | 2 | 0 | 1 | 1 | hsa-miR-622 | -0.09 | N/A | Sites in UTR |
| SSR1      | NM_003144    | signal sequence receptor, alpha                                      | 1 | 0 | 1 | 0 | 1 | 1 | 0 | 0 | hsa-miR-622 | -0.09 | N/A | Sites in UTR |
| CDH8      | NM_001796    | cadherin 8, type 2                                                   | 0 | 0 | 0 | 0 | 1 | 0 | 0 | 1 | hsa-miR-622 | -0.09 | N/A | Sites in UTR |

|          |              |                                                      |   |   |   |   |   |   |   |   |             |       |     |              |
|----------|--------------|------------------------------------------------------|---|---|---|---|---|---|---|---|-------------|-------|-----|--------------|
| HERC3    | NM_014606    | hect domain and RLD 3                                | 0 | 0 | 0 | 0 | 1 | 0 | 0 | 1 | hsa-miR-622 | -0.09 | N/A | Sites in UTR |
| VAX1     | NM_199131    | ventral anterior homeobox 1                          | 0 | 0 | 0 | 0 | 1 | 0 | 0 | 1 | hsa-miR-622 | -0.09 | N/A | Sites in UTR |
| FETUB    | NM_014375    | fetuin B                                             | 0 | 0 | 0 | 0 | 1 | 0 | 0 | 1 | hsa-miR-622 | -0.09 | N/A | Sites in UTR |
| MLH3     | NM_001040108 | mutL homolog 3 (E. coli)                             | 0 | 0 | 0 | 0 | 1 | 0 | 0 | 1 | hsa-miR-622 | -0.09 | N/A | Sites in UTR |
| STARD3NL | NM_032016    | STARD3 N-terminal like                               | 0 | 0 | 0 | 0 | 1 | 0 | 0 | 1 | hsa-miR-622 | -0.09 | N/A | Sites in UTR |
| IGFL2    | NM_001002915 | IGF-like family member 2                             | 0 | 0 | 0 | 0 | 1 | 0 | 0 | 1 | hsa-miR-622 | -0.09 | N/A | Sites in UTR |
| RIBC1    | NM_144968    | RIB43A domain with coiled-coils 1                    | 0 | 0 | 0 | 0 | 1 | 0 | 0 | 1 | hsa-miR-622 | -0.09 | N/A | Sites in UTR |
| NANOS1   | NM_199461    | nanos homolog 1 (Drosophila)                         | 0 | 0 | 0 | 0 | 1 | 0 | 0 | 1 | hsa-miR-622 | -0.09 | N/A | Sites in UTR |
| FBLN1    | NM_006485    | fibulin 1                                            | 0 | 0 | 0 | 0 | 1 | 0 | 1 | 0 | hsa-miR-622 | -0.09 | N/A | Sites in UTR |
| ODZ1     | NM_001163278 | odz, odd Oz/ten-m homolog 1 (Drosophila)             | 0 | 0 | 0 | 0 | 1 | 0 | 1 | 0 | hsa-miR-622 | -0.09 | N/A | Sites in UTR |
| TAB1     | NM_006116    | TGF-beta activated kinase 1/MAP3K7 binding protein 1 | 1 | 0 | 1 | 0 | 0 | 0 | 0 | 0 | hsa-miR-622 | -0.09 | N/A | Sites in UTR |
| EHD4     | NM_139265    | EH-domain containing 4                               | 0 | 0 | 0 | 0 | 1 | 0 | 1 | 0 | hsa-miR-622 | -0.09 | N/A | Sites in UTR |
| REEP2    | NM_016606    | receptor accessory protein 2                         | 0 | 0 | 0 | 0 | 1 | 0 | 1 | 0 | hsa-miR-622 | -0.09 | N/A | Sites in UTR |
| CELF5    | NM_001172673 | CUGBP, Elav-like family member 5                     | 0 | 0 | 0 | 0 | 1 | 0 | 1 | 0 | hsa-miR-622 | -0.09 | N/A | Sites in UTR |
| ZBTB3    | NM_024784    | zinc finger and BTB domain containing 3              | 0 | 0 | 0 | 0 | 1 | 0 | 1 | 0 | hsa-miR-622 | -0.09 | N/A | Sites in UTR |
| ZNF709   | NM_152601    | zinc finger protein 709                              | 0 | 0 | 0 | 0 | 1 | 0 | 1 | 0 | hsa-miR-622 | -0.09 | N/A | Sites in UTR |
| C8orf46  | NM_152765    | chromosome 8 open reading frame 46                   | 0 | 0 | 0 | 0 | 1 | 0 | 1 | 0 | hsa-miR-622 | -0.09 | N/A | Sites in UTR |
| ASB4     | NM_016116    | ankyrin repeat and SOCS box containing 4             | 0 | 0 | 0 | 0 | 1 | 1 | 0 | 0 | hsa-miR-622 | -0.09 | N/A | Sites in UTR |

|              |              |                                                      |   |   |   |   |   |   |   |   |             |       |     |              |
|--------------|--------------|------------------------------------------------------|---|---|---|---|---|---|---|---|-------------|-------|-----|--------------|
| SHE          | NM_001010846 | Src homology 2 domain containing E                   | 0 | 0 | 0 | 0 | 2 | 0 | 2 | 0 | hsa-miR-622 | -0.09 | N/A | Sites in UTR |
| LOC100507462 | NM_001242740 | hypothetical LOC100507462                            | 0 | 0 | 0 | 0 | 2 | 1 | 1 | 0 | hsa-miR-622 | -0.09 | N/A | Sites in UTR |
| LIPA         | NM_000235    | lipase A, lysosomal acid, cholesterol esterase       | 0 | 0 | 0 | 0 | 1 | 0 | 0 | 1 | hsa-miR-622 | -0.09 | N/A | Sites in UTR |
| CNTN3        | NM_020872    | contactin 3 (plasmacytoma associated)                | 0 | 0 | 0 | 0 | 1 | 0 | 0 | 1 | hsa-miR-622 | -0.09 | N/A | Sites in UTR |
| ATP2C1       | NM_001199179 | ATPase, Ca++ transporting, type 2C, member 1         | 0 | 0 | 0 | 0 | 1 | 0 | 0 | 1 | hsa-miR-622 | -0.09 | N/A | Sites in UTR |
| KCNK4        | NM_033310    | potassium channel, subfamily K, member 4             | 0 | 0 | 0 | 0 | 1 | 0 | 0 | 1 | hsa-miR-622 | -0.09 | N/A | Sites in UTR |
| CCDC60       | NM_178499    | coiled-coil domain containing 60                     | 0 | 0 | 0 | 0 | 1 | 0 | 0 | 1 | hsa-miR-622 | -0.09 | N/A | Sites in UTR |
| SKA3         | NM_001166017 | spindle and kinetochore associated complex subunit 3 | 0 | 0 | 0 | 0 | 1 | 0 | 0 | 1 | hsa-miR-622 | -0.09 | N/A | Sites in UTR |
| DLX3         | NM_005220    | distal-less homeobox 3                               | 0 | 0 | 0 | 0 | 1 | 0 | 1 | 0 | hsa-miR-622 | -0.09 | N/A | Sites in UTR |
| ATF7         | NM_001130059 | activating transcription factor 7                    | 0 | 0 | 0 | 0 | 1 | 0 | 1 | 0 | hsa-miR-622 | -0.09 | N/A | Sites in UTR |
| PISD         | NM_014338    | phosphatidylserine decarboxylase                     | 0 | 0 | 0 | 0 | 1 | 0 | 1 | 0 | hsa-miR-622 | -0.09 | N/A | Sites in UTR |
| BCAP29       | NM_001008405 | B-cell receptor-associated protein 29                | 0 | 0 | 0 | 0 | 1 | 0 | 1 | 0 | hsa-miR-622 | -0.09 | N/A | Sites in UTR |
| C13orf30     | NM_182508    | chromosome 13 open reading frame 30                  | 0 | 0 | 0 | 0 | 1 | 0 | 1 | 0 | hsa-miR-622 | -0.09 | N/A | Sites in UTR |
| AMZ1         | NM_133463    | archaelysin family metallopeptidase 1                | 0 | 0 | 0 | 0 | 1 | 0 | 1 | 0 | hsa-miR-622 | -0.09 | N/A | Sites in UTR |
| TMEM217      | NM_145316    | transmembrane protein 217                            | 0 | 0 | 0 | 0 | 1 | 0 | 1 | 0 | hsa-miR-622 | -0.09 | N/A | Sites in UTR |
| TBC1D28      | NM_001039397 | TBC1 domain family, member 28                        | 0 | 0 | 0 | 0 | 1 | 0 | 1 | 0 | hsa-miR-622 | -0.09 | N/A | Sites in UTR |
| PEG10        | NM_001040152 | paternally expressed 10                              | 0 | 0 | 0 | 0 | 1 | 0 | 0 | 1 | hsa-miR-622 | -0.09 | N/A | Sites in UTR |
| ABHD14B      | NM_001146314 | abhydrolase domain containing 14B                    | 0 | 0 | 0 | 0 | 1 | 0 | 0 | 1 | hsa-miR-622 | -0.09 | N/A | Sites in UTR |



|          |              |                                                                  |   |   |   |   |   |   |   |   |             |       |     |              |
|----------|--------------|------------------------------------------------------------------|---|---|---|---|---|---|---|---|-------------|-------|-----|--------------|
| FBXO48   | NM_001024680 | F-box protein 48                                                 | 0 | 0 | 0 | 0 | 1 | 0 | 0 | 1 | hsa-miR-622 | -0.09 | N/A | Sites in UTR |
| ZFP36L2  | NM_006887    | zinc finger protein 36, C3H type-like 2                          | 0 | 0 | 0 | 0 | 1 | 0 | 1 | 0 | hsa-miR-622 | -0.09 | N/A | Sites in UTR |
| B3GALT5  | NM_006057    | UDP-Gal:betaGlcNAc beta 1,3-galactosyltransferase, polypeptide 5 | 0 | 0 | 0 | 0 | 1 | 0 | 1 | 0 | hsa-miR-622 | -0.09 | N/A | Sites in UTR |
| WDR5     | NM_017588    | WD repeat domain 5                                               | 0 | 0 | 0 | 0 | 1 | 0 | 1 | 0 | hsa-miR-622 | -0.09 | N/A | Sites in UTR |
| UNC93A   | NM_001143947 | unc-93 homolog A (C. elegans)                                    | 0 | 0 | 0 | 0 | 1 | 0 | 1 | 0 | hsa-miR-622 | -0.09 | N/A | Sites in UTR |
| TMEM209  | NM_032842    | transmembrane protein 209                                        | 0 | 0 | 0 | 0 | 1 | 0 | 1 | 0 | hsa-miR-622 | -0.09 | N/A | Sites in UTR |
| HINT3    | NM_138571    | histidine triad nucleotide binding protein 3                     | 0 | 0 | 0 | 0 | 2 | 0 | 1 | 1 | hsa-miR-622 | -0.09 | N/A | Sites in UTR |
| DLX2     | NM_004405    | distal-less homeobox 2                                           | 0 | 0 | 0 | 0 | 1 | 0 | 0 | 1 | hsa-miR-622 | -0.09 | N/A | Sites in UTR |
| GDF2     | NM_016204    | growth differentiation factor 2                                  | 0 | 0 | 0 | 0 | 1 | 0 | 0 | 1 | hsa-miR-622 | -0.09 | N/A | Sites in UTR |
| RALBP1   | NM_006788    | ralA binding protein 1                                           | 0 | 0 | 0 | 0 | 1 | 0 | 0 | 1 | hsa-miR-622 | -0.09 | N/A | Sites in UTR |
| NHLRC3   | NM_001012754 | NHL repeat containing 3                                          | 0 | 0 | 0 | 0 | 1 | 0 | 0 | 1 | hsa-miR-622 | -0.09 | N/A | Sites in UTR |
| P2RY6    | NM_004154    | pyrimidinergic receptor P2Y, G-protein coupled, 6                | 0 | 0 | 0 | 0 | 1 | 0 | 1 | 0 | hsa-miR-622 | -0.09 | N/A | Sites in UTR |
| GPR55    | NM_005683    | G protein-coupled receptor 55                                    | 0 | 0 | 0 | 0 | 1 | 0 | 1 | 0 | hsa-miR-622 | -0.09 | N/A | Sites in UTR |
| MTHFSD   | NM_001159377 | methenyltetrahydrofolate synthetase domain containing            | 0 | 0 | 0 | 0 | 1 | 0 | 1 | 0 | hsa-miR-622 | -0.09 | N/A | Sites in UTR |
| ADAMTS14 | NM_080722    | ADAM metalloproteinase with thrombospondin type 1 motif, 14      | 0 | 0 | 0 | 0 | 1 | 0 | 1 | 0 | hsa-miR-622 | -0.09 | N/A | Sites in UTR |
| SYNPO2   | NM_133477    | synaptopodin 2                                                   | 0 | 0 | 0 | 0 | 1 | 0 | 1 | 0 | hsa-miR-622 | -0.09 | N/A | Sites in UTR |
| MDGA1    | NM_153487    | MAM domain containing glycosylphosphatidylinositol anchor 1      | 1 | 0 | 0 | 1 | 1 | 0 | 0 | 1 | hsa-miR-622 | -0.09 | N/A | Sites in UTR |
| GPX5     | NM_001509    | glutathione peroxidase 5 (epididymal androgen-related protein)   | 0 | 0 | 0 | 0 | 1 | 0 | 0 | 1 | hsa-miR-622 | -0.08 | N/A | Sites in UTR |

|          |              |                                                                                        |   |   |   |   |   |   |   |   |             |       |     |              |
|----------|--------------|----------------------------------------------------------------------------------------|---|---|---|---|---|---|---|---|-------------|-------|-----|--------------|
| LAMP2    | NM_002294    | lysosomal-associated membrane protein 2                                                | 0 | 0 | 0 | 0 | 1 | 0 | 0 | 1 | hsa-miR-622 | -0.08 | N/A | Sites in UTR |
| SRA1     | NM_001035235 | steroid receptor RNA activator 1                                                       | 0 | 0 | 0 | 0 | 1 | 0 | 0 | 1 | hsa-miR-622 | -0.08 | N/A | Sites in UTR |
| ST7L     | NM_017744    | suppression of tumorigenicity 7 like                                                   | 0 | 0 | 0 | 0 | 1 | 0 | 0 | 1 | hsa-miR-622 | -0.08 | N/A | Sites in UTR |
| KLHL15   | NM_030624    | kelch-like 15 (Drosophila)                                                             | 0 | 0 | 0 | 0 | 1 | 0 | 0 | 1 | hsa-miR-622 | -0.08 | N/A | Sites in UTR |
| EAF1     | NM_033083    | ELL associated factor 1                                                                | 0 | 0 | 0 | 0 | 1 | 0 | 0 | 1 | hsa-miR-622 | -0.08 | N/A | Sites in UTR |
| RASSF3   | NM_001242691 | Ras association (RalGDS/AF-6) domain family member 3                                   | 0 | 0 | 0 | 0 | 1 | 0 | 0 | 1 | hsa-miR-622 | -0.08 | N/A | Sites in UTR |
| CBFA2T2  | NM_001032999 | core-binding factor, runt domain, alpha subunit 2; translocated to, 2                  | 0 | 0 | 0 | 0 | 1 | 0 | 1 | 0 | hsa-miR-622 | -0.08 | N/A | Sites in UTR |
| OSBPL2   | NM_014835    | oxysterol binding protein-like 2                                                       | 0 | 0 | 0 | 0 | 1 | 0 | 1 | 0 | hsa-miR-622 | -0.08 | N/A | Sites in UTR |
| C1orf198 | NM_001136494 | chromosome 1 open reading frame 198                                                    | 0 | 0 | 0 | 0 | 1 | 0 | 1 | 0 | hsa-miR-622 | -0.08 | N/A | Sites in UTR |
| HCAR2    | NM_177551    | hydroxycarboxylic acid receptor 2                                                      | 0 | 0 | 0 | 0 | 1 | 0 | 1 | 0 | hsa-miR-622 | -0.08 | N/A | Sites in UTR |
| C2orf68  | NM_001013649 | chromosome 2 open reading frame 68                                                     | 0 | 0 | 0 | 0 | 1 | 0 | 1 | 0 | hsa-miR-622 | -0.08 | N/A | Sites in UTR |
| PTPN21   | NM_007039    | protein tyrosine phosphatase, non-receptor type 21                                     | 0 | 0 | 0 | 0 | 1 | 1 | 0 | 0 | hsa-miR-622 | -0.08 | N/A | Sites in UTR |
| CDHR3    | NM_152750    | cadherin-related family member 3                                                       | 0 | 0 | 0 | 0 | 2 | 0 | 1 | 1 | hsa-miR-622 | -0.08 | N/A | Sites in UTR |
| QKI      | NM_006775    | quaking homolog, KH domain RNA binding (mouse)                                         | 0 | 0 | 0 | 0 | 2 | 0 | 2 | 0 | hsa-miR-622 | -0.08 | N/A | Sites in UTR |
| CBX5     | NM_001127321 | chromobox homolog 5                                                                    | 1 | 0 | 1 | 0 | 2 | 0 | 2 | 0 | hsa-miR-622 | -0.08 | N/A | Sites in UTR |
| CD55     | NM_000574    | CD55 molecule, decay accelerating factor for complement (Cromer blood group)           | 0 | 0 | 0 | 0 | 1 | 0 | 0 | 1 | hsa-miR-622 | -0.08 | N/A | Sites in UTR |
| EEF1D    | NM_001130053 | eukaryotic translation elongation factor 1 delta (guanine nucleotide exchange protein) | 0 | 0 | 0 | 0 | 1 | 0 | 0 | 1 | hsa-miR-622 | -0.08 | N/A | Sites in UTR |
| SIRT5    | NM_001193267 | sirtuin 5                                                                              | 0 | 0 | 0 | 0 | 1 | 0 | 0 | 1 | hsa-miR-622 | -0.08 | N/A | Sites in UTR |

|          |              |                                                                                 |   |   |   |   |   |   |   |   |             |       |     |              |
|----------|--------------|---------------------------------------------------------------------------------|---|---|---|---|---|---|---|---|-------------|-------|-----|--------------|
| SHISA5   | NM_016479    | shisa homolog 5 ( <i>Xenopus laevis</i> )                                       | 0 | 0 | 0 | 0 | 1 | 0 | 0 | 1 | hsa-miR-622 | -0.08 | N/A | Sites in UTR |
| SUSD3    | NM_145006    | sushi domain containing 3                                                       | 0 | 0 | 0 | 0 | 1 | 0 | 0 | 1 | hsa-miR-622 | -0.08 | N/A | Sites in UTR |
| PIRT     | NM_001101387 | phosphoinositide-interacting regulator of transient receptor potential channels | 0 | 0 | 0 | 0 | 1 | 0 | 0 | 1 | hsa-miR-622 | -0.08 | N/A | Sites in UTR |
| POU6F1   | NM_002702    | POU class 6 homeobox 1                                                          | 0 | 0 | 0 | 0 | 1 | 0 | 1 | 0 | hsa-miR-622 | -0.08 | N/A | Sites in UTR |
| DBF4     | NM_006716    | DBF4 homolog ( <i>S. cerevisiae</i> )                                           | 0 | 0 | 0 | 0 | 1 | 0 | 1 | 0 | hsa-miR-622 | -0.08 | N/A | Sites in UTR |
| SIK3     | NM_025164    | SIK family kinase 3                                                             | 0 | 0 | 0 | 0 | 1 | 0 | 1 | 0 | hsa-miR-622 | -0.08 | N/A | Sites in UTR |
| HUNK     | NM_014586    | hormonally up-regulated Neu-associated kinase                                   | 0 | 0 | 0 | 0 | 2 | 0 | 1 | 1 | hsa-miR-622 | -0.08 | N/A | Sites in UTR |
| CTGF     | NM_001901    | connective tissue growth factor                                                 | 0 | 0 | 0 | 0 | 1 | 0 | 0 | 1 | hsa-miR-622 | -0.08 | N/A | Sites in UTR |
| GAB1     | NM_002039    | GRB2-associated binding protein 1                                               | 1 | 0 | 0 | 1 | 0 | 0 | 0 | 0 | hsa-miR-622 | -0.08 | N/A | Sites in UTR |
| TRIM37   | NM_015294    | tripartite motif containing 37                                                  | 0 | 0 | 0 | 0 | 1 | 0 | 0 | 1 | hsa-miR-622 | -0.08 | N/A | Sites in UTR |
| TCEA1    | NM_006756    | transcription elongation factor A (SII), 1                                      | 0 | 0 | 0 | 0 | 1 | 0 | 0 | 1 | hsa-miR-622 | -0.08 | N/A | Sites in UTR |
| SIRPG    | NM_001039508 | signal-regulatory protein gamma                                                 | 0 | 0 | 0 | 0 | 1 | 0 | 0 | 1 | hsa-miR-622 | -0.08 | N/A | Sites in UTR |
| LRRC4    | NM_022143    | leucine rich repeat containing 4                                                | 0 | 0 | 0 | 0 | 1 | 0 | 0 | 1 | hsa-miR-622 | -0.08 | N/A | Sites in UTR |
| ZNF576   | NM_001145347 | zinc finger protein 576                                                         | 0 | 0 | 0 | 0 | 1 | 0 | 0 | 1 | hsa-miR-622 | -0.08 | N/A | Sites in UTR |
| RUNDC3B  | NM_001134405 | RUN domain containing 3B                                                        | 0 | 0 | 0 | 0 | 1 | 0 | 0 | 1 | hsa-miR-622 | -0.08 | N/A | Sites in UTR |
| GLOD5    | NM_001080489 | glyoxalase domain containing 5                                                  | 0 | 0 | 0 | 0 | 1 | 0 | 0 | 1 | hsa-miR-622 | -0.08 | N/A | Sites in UTR |
| ERVFRD-1 | NM_207582    | endogenous retrovirus group FRD, member 1                                       | 0 | 0 | 0 | 0 | 1 | 0 | 0 | 1 | hsa-miR-622 | -0.08 | N/A | Sites in UTR |
| HMX1     | NM_018942    | H6 family homeobox 1                                                            | 0 | 0 | 0 | 0 | 1 | 0 | 1 | 0 | hsa-miR-622 | -0.08 | N/A | Sites in UTR |

|          |              |                                                                                  |   |   |   |   |   |   |   |   |             |       |     |              |
|----------|--------------|----------------------------------------------------------------------------------|---|---|---|---|---|---|---|---|-------------|-------|-----|--------------|
| KCNK3    | NM_002246    | potassium channel, subfamily K, member 3                                         | 0 | 0 | 0 | 0 | 1 | 0 | 1 | 0 | hsa-miR-622 | -0.08 | N/A | Sites in UTR |
| ZDHHC14  | NM_024630    | zinc finger, DHHC-type containing 14                                             | 0 | 0 | 0 | 0 | 1 | 0 | 1 | 0 | hsa-miR-622 | -0.08 | N/A | Sites in UTR |
| STRN     | NM_003162    | striatin, calmodulin binding protein                                             | 0 | 0 | 0 | 0 | 1 | 1 | 0 | 0 | hsa-miR-622 | -0.08 | N/A | Sites in UTR |
| BNC1     | NM_001717    | basonuclin 1                                                                     | 0 | 0 | 0 | 0 | 1 | 0 | 0 | 1 | hsa-miR-622 | -0.08 | N/A | Sites in UTR |
| TAF1     | NM_004606    | TAF1 RNA polymerase II, TATA box binding protein (TBP)-associated factor, 250kDa | 0 | 0 | 0 | 0 | 1 | 0 | 0 | 1 | hsa-miR-622 | -0.08 | N/A | Sites in UTR |
| GPR88    | NM_022049    | G protein-coupled receptor 88                                                    | 0 | 0 | 0 | 0 | 1 | 0 | 0 | 1 | hsa-miR-622 | -0.08 | N/A | Sites in UTR |
| FAM134B  | NM_001034850 | family with sequence similarity 134, member B                                    | 0 | 0 | 0 | 0 | 1 | 0 | 0 | 1 | hsa-miR-622 | -0.08 | N/A | Sites in UTR |
| SCUBE2   | NM_001170690 | signal peptide, CUB domain, EGF-like 2                                           | 0 | 0 | 0 | 0 | 1 | 0 | 0 | 1 | hsa-miR-622 | -0.08 | N/A | Sites in UTR |
| ZNF431   | NM_133473    | zinc finger protein 431                                                          | 0 | 0 | 0 | 0 | 1 | 0 | 0 | 1 | hsa-miR-622 | -0.08 | N/A | Sites in UTR |
| DHFRL1   | NM_001195643 | dihydrofolate reductase-like 1                                                   | 0 | 0 | 0 | 0 | 1 | 0 | 0 | 1 | hsa-miR-622 | -0.08 | N/A | Sites in UTR |
| KLK2     | NM_001002231 | kallikrein-related peptidase 2                                                   | 0 | 0 | 0 | 0 | 1 | 0 | 1 | 0 | hsa-miR-622 | -0.08 | N/A | Sites in UTR |
| PPL      | NM_002705    | periplakin                                                                       | 0 | 0 | 0 | 0 | 1 | 0 | 1 | 0 | hsa-miR-622 | -0.08 | N/A | Sites in UTR |
| RAD50    | NM_005732    | RAD50 homolog ( <i>S. cerevisiae</i> )                                           | 0 | 0 | 0 | 0 | 1 | 0 | 1 | 0 | hsa-miR-622 | -0.08 | N/A | Sites in UTR |
| RASD2    | NM_014310    | RASD family, member 2                                                            | 0 | 0 | 0 | 0 | 1 | 0 | 1 | 0 | hsa-miR-622 | -0.08 | N/A | Sites in UTR |
| GOLGA6L1 | NM_001001413 | golgin A6 family-like 1                                                          | 0 | 0 | 0 | 0 | 1 | 0 | 1 | 0 | hsa-miR-622 | -0.08 | N/A | Sites in UTR |
| HECA     | NM_016217    | headcase homolog ( <i>Drosophila</i> )                                           | 0 | 0 | 0 | 0 | 2 | 0 | 0 | 2 | hsa-miR-622 | -0.08 | N/A | Sites in UTR |
| HMBS     | NM_000190    | hydroxymethylbilane synthase                                                     | 0 | 0 | 0 | 0 | 1 | 0 | 0 | 1 | hsa-miR-622 | -0.08 | N/A | Sites in UTR |
| SNRPE    | NM_003094    | small nuclear ribonucleoprotein polypeptide E                                    | 0 | 0 | 0 | 0 | 1 | 0 | 0 | 1 | hsa-miR-622 | -0.08 | N/A | Sites in UTR |

|          |              |                                                                                   |   |   |   |   |   |   |   |   |             |       |     |              |
|----------|--------------|-----------------------------------------------------------------------------------|---|---|---|---|---|---|---|---|-------------|-------|-----|--------------|
| KLHL28   | NM_017658    | kelch-like 28 (Drosophila)                                                        | 0 | 0 | 0 | 0 | 1 | 0 | 0 | 1 | hsa-miR-622 | -0.08 | N/A | Sites in UTR |
| TXNDC16  | NM_001160047 | thioredoxin domain containing 16                                                  | 0 | 0 | 0 | 0 | 1 | 0 | 0 | 1 | hsa-miR-622 | -0.08 | N/A | Sites in UTR |
| HSH2D    | NM_032855    | hematopoietic SH2 domain containing                                               | 0 | 0 | 0 | 0 | 1 | 0 | 0 | 1 | hsa-miR-622 | -0.08 | N/A | Sites in UTR |
| MMS22L   | NM_198468    | MMS22-like, DNA repair protein                                                    | 0 | 0 | 0 | 0 | 1 | 0 | 0 | 1 | hsa-miR-622 | -0.08 | N/A | Sites in UTR |
| FAM111B  | NM_001142703 | family with sequence similarity 111, member B                                     | 0 | 0 | 0 | 0 | 1 | 0 | 0 | 1 | hsa-miR-622 | -0.08 | N/A | Sites in UTR |
| GTF3C5   | NM_001122823 | general transcription factor IIIC, polypeptide 5, 63kDa                           | 0 | 0 | 0 | 0 | 1 | 0 | 1 | 0 | hsa-miR-622 | -0.08 | N/A | Sites in UTR |
| RAB14    | NM_016322    | RAB14, member RAS oncogene family                                                 | 1 | 0 | 1 | 0 | 0 | 0 | 0 | 0 | hsa-miR-622 | -0.08 | N/A | Sites in UTR |
| RGMA     | NM_001166283 | RGM domain family, member A                                                       | 0 | 0 | 0 | 0 | 1 | 0 | 1 | 0 | hsa-miR-622 | -0.08 | N/A | Sites in UTR |
| NDRG4    | NM_001130487 | NDRG family member 4                                                              | 0 | 0 | 0 | 0 | 1 | 0 | 1 | 0 | hsa-miR-622 | -0.08 | N/A | Sites in UTR |
| TYSND1   | NM_001040273 | trypsin domain containing 1                                                       | 0 | 0 | 0 | 0 | 2 | 0 | 2 | 0 | hsa-miR-622 | -0.08 | N/A | Sites in UTR |
| DMD      | NM_000109    | dystrophin                                                                        | 0 | 0 | 0 | 0 | 1 | 0 | 0 | 1 | hsa-miR-622 | -0.08 | N/A | Sites in UTR |
| FABP3    | NM_004102    | fatty acid binding protein 3, muscle and heart (mammary-derived growth inhibitor) | 0 | 0 | 0 | 0 | 1 | 0 | 0 | 1 | hsa-miR-622 | -0.08 | N/A | Sites in UTR |
| PHF1     | NM_002636    | PHD finger protein 1                                                              | 0 | 0 | 0 | 0 | 1 | 0 | 0 | 1 | hsa-miR-622 | -0.08 | N/A | Sites in UTR |
| SERPIN5  | NM_002639    | serpin peptidase inhibitor, clade B (ovalbumin), member 5                         | 0 | 0 | 0 | 0 | 1 | 0 | 0 | 1 | hsa-miR-622 | -0.08 | N/A | Sites in UTR |
| SLC5A1   | NM_000343    | solute carrier family 5 (sodium/glucose cotransporter), member 1                  | 0 | 0 | 0 | 0 | 1 | 0 | 0 | 1 | hsa-miR-622 | -0.08 | N/A | Sites in UTR |
| KCNH8    | NM_144633    | potassium voltage-gated channel, subfamily H (eag-related), member 8              | 0 | 0 | 0 | 0 | 1 | 0 | 0 | 1 | hsa-miR-622 | -0.08 | N/A | Sites in UTR |
| SPRED1   | NM_152594    | sprouty-related, EVH1 domain containing 1                                         | 0 | 0 | 0 | 0 | 1 | 0 | 0 | 1 | hsa-miR-622 | -0.08 | N/A | Sites in UTR |
| ADAMTS18 | NM_199355    | ADAM metallopeptidase with thrombospondin type 1 motif, 18                        | 0 | 0 | 0 | 0 | 1 | 0 | 0 | 1 | hsa-miR-622 | -0.08 | N/A | Sites in UTR |

|          |              |                                                                |   |   |   |   |   |   |   |   |             |       |     |              |
|----------|--------------|----------------------------------------------------------------|---|---|---|---|---|---|---|---|-------------|-------|-----|--------------|
| DZIP1L   | NM_173543    | DAZ interacting protein 1-like                                 | 0 | 0 | 0 | 0 | 1 | 0 | 0 | 1 | hsa-miR-622 | -0.08 | N/A | Sites in UTR |
| ANKRD13D | NM_207354    | ankyrin repeat domain 13 family, member D                      | 0 | 0 | 0 | 0 | 1 | 0 | 0 | 1 | hsa-miR-622 | -0.08 | N/A | Sites in UTR |
| EPHA2    | NM_004431    | EPH receptor A2                                                | 0 | 0 | 0 | 0 | 1 | 0 | 1 | 0 | hsa-miR-622 | -0.08 | N/A | Sites in UTR |
| F2RL1    | NM_005242    | coagulation factor II (thrombin) receptor-like 1               | 0 | 0 | 0 | 0 | 1 | 0 | 1 | 0 | hsa-miR-622 | -0.08 | N/A | Sites in UTR |
| ATG4B    | NM_013325    | ATG4 autophagy related 4 homolog B (S. cerevisiae)             | 0 | 0 | 0 | 0 | 1 | 0 | 1 | 0 | hsa-miR-622 | -0.08 | N/A | Sites in UTR |
| DBNDD1   | NM_001042610 | dysbindin (dystrobrevin binding protein 1) domain containing 1 | 0 | 0 | 0 | 0 | 1 | 0 | 1 | 0 | hsa-miR-622 | -0.08 | N/A | Sites in UTR |
| BPIL1    | NM_025227    | bactericidal/permeability-increasing protein-like 1            | 0 | 0 | 0 | 0 | 1 | 0 | 1 | 0 | hsa-miR-622 | -0.08 | N/A | Sites in UTR |
| APH1B    | NM_001145646 | anterior pharynx defective 1 homolog B (C. elegans)            | 0 | 0 | 0 | 0 | 1 | 0 | 1 | 0 | hsa-miR-622 | -0.08 | N/A | Sites in UTR |
| MYADML2  | NM_001145113 | myeloid-associated differentiation marker-like 2               | 0 | 0 | 0 | 0 | 1 | 0 | 1 | 0 | hsa-miR-622 | -0.08 | N/A | Sites in UTR |
| GOLGA6L6 | NM_001145004 | golgin A6 family-like 6                                        | 0 | 0 | 0 | 0 | 1 | 0 | 1 | 0 | hsa-miR-622 | -0.08 | N/A | Sites in UTR |
| PANK1    | NM_138316    | pantothenate kinase 1                                          | 0 | 0 | 0 | 0 | 2 | 0 | 0 | 2 | hsa-miR-622 | -0.08 | N/A | Sites in UTR |
| LAMP3    | NM_014398    | lysosomal-associated membrane protein 3                        | 0 | 0 | 0 | 0 | 2 | 0 | 1 | 1 | hsa-miR-622 | -0.08 | N/A | Sites in UTR |
| RASGRP1  | NM_001128602 | RAS guanyl releasing protein 1 (calcium and DAG-regulated)     | 0 | 0 | 0 | 0 | 1 | 1 | 0 | 0 | hsa-miR-622 | -0.08 | N/A | Sites in UTR |
| OPHN1    | NM_002547    | oligophrenin 1                                                 | 0 | 0 | 0 | 0 | 2 | 0 | 0 | 2 | hsa-miR-622 | -0.08 | N/A | Sites in UTR |
| KHNYN    | NM_015299    | KH and NYN domain containing                                   | 1 | 1 | 0 | 0 | 1 | 0 | 0 | 1 | hsa-miR-622 | -0.08 | N/A | Sites in UTR |
| SCAI     | NM_001144877 | suppressor of cancer cell invasion                             | 1 | 0 | 0 | 1 | 1 | 0 | 1 | 0 | hsa-miR-622 | -0.08 | N/A | Sites in UTR |
| ZNF621   | NM_001098414 | zinc finger protein 621                                        | 0 | 0 | 0 | 0 | 3 | 0 | 2 | 1 | hsa-miR-622 | -0.08 | N/A | Sites in UTR |
| ANK3     | NM_001149    | ankyrin 3, node of Ranvier (ankyrin G)                         | 0 | 0 | 0 | 0 | 1 | 0 | 0 | 1 | hsa-miR-622 | -0.08 | N/A | Sites in UTR |

|          |              |                                                                                       |   |   |   |   |   |   |   |   |             |       |     |              |
|----------|--------------|---------------------------------------------------------------------------------------|---|---|---|---|---|---|---|---|-------------|-------|-----|--------------|
| PRDM1    | NM_001198    | PR domain containing 1, with ZNF domain                                               | 0 | 0 | 0 | 0 | 1 | 0 | 0 | 1 | hsa-miR-622 | -0.08 | N/A | Sites in UTR |
| F7       | NM_000131    | coagulation factor VII (serum prothrombin conversion accelerator)                     | 0 | 0 | 0 | 0 | 1 | 0 | 0 | 1 | hsa-miR-622 | -0.08 | N/A | Sites in UTR |
| GRIA4    | NM_000829    | glutamate receptor, ionotropic, AMPA 4                                                | 0 | 0 | 0 | 0 | 1 | 0 | 0 | 1 | hsa-miR-622 | -0.08 | N/A | Sites in UTR |
| PA2G4    | NM_006191    | proliferation-associated 2G4, 38kDa                                                   | 0 | 0 | 0 | 0 | 1 | 0 | 0 | 1 | hsa-miR-622 | -0.08 | N/A | Sites in UTR |
| SLC35D2  | NM_007001    | solute carrier family 35, member D2                                                   | 0 | 0 | 0 | 0 | 1 | 0 | 0 | 1 | hsa-miR-622 | -0.08 | N/A | Sites in UTR |
| FGFR1OP2 | NM_001171887 | FGFR1 oncogene partner 2                                                              | 0 | 0 | 0 | 0 | 1 | 0 | 0 | 1 | hsa-miR-622 | -0.08 | N/A | Sites in UTR |
| RRP15    | NM_016052    | ribosomal RNA processing 15 homolog (S. cerevisiae)                                   | 0 | 0 | 0 | 0 | 1 | 0 | 0 | 1 | hsa-miR-622 | -0.08 | N/A | Sites in UTR |
| HERC6    | NM_001165136 | hect domain and RLD 6                                                                 | 0 | 0 | 0 | 0 | 1 | 0 | 0 | 1 | hsa-miR-622 | -0.08 | N/A | Sites in UTR |
| EFHA2    | NM_181723    | EF-hand domain family, member A2                                                      | 0 | 0 | 0 | 0 | 1 | 0 | 0 | 1 | hsa-miR-622 | -0.08 | N/A | Sites in UTR |
| LHFP     | NM_005780    | lipoma HMGIC fusion partner                                                           | 0 | 0 | 0 | 0 | 1 | 0 | 1 | 0 | hsa-miR-622 | -0.08 | N/A | Sites in UTR |
| LATS2    | NM_014572    | LATS, large tumor suppressor, homolog 2 (Drosophila)                                  | 0 | 0 | 0 | 0 | 1 | 0 | 1 | 0 | hsa-miR-622 | -0.08 | N/A | Sites in UTR |
| A2LD1    | NM_001195087 | AIG2-like domain 1                                                                    | 0 | 0 | 0 | 0 | 1 | 0 | 1 | 0 | hsa-miR-622 | -0.08 | N/A | Sites in UTR |
| HEPHL1   | NM_001098672 | hephaestin-like 1                                                                     | 0 | 0 | 0 | 0 | 2 | 0 | 1 | 1 | hsa-miR-622 | -0.08 | N/A | Sites in UTR |
| TCF3     | NM_001136139 | transcription factor 3 (E2A immunoglobulin enhancer binding factors E12/E47)          | 0 | 0 | 0 | 0 | 2 | 0 | 1 | 1 | hsa-miR-622 | -0.08 | N/A | Sites in UTR |
| ATCAY    | NM_033064    | ataxia, cerebellar, Cayman type                                                       | 0 | 0 | 0 | 0 | 2 | 0 | 1 | 1 | hsa-miR-622 | -0.08 | N/A | Sites in UTR |
| SV2B     | NM_001167580 | synaptic vesicle glycoprotein 2B                                                      | 0 | 0 | 0 | 0 | 2 | 1 | 0 | 1 | hsa-miR-622 | -0.08 | N/A | Sites in UTR |
| CD97     | NM_001025160 | CD97 molecule                                                                         | 1 | 0 | 0 | 1 | 0 | 0 | 0 | 0 | hsa-miR-622 | -0.08 | N/A | Sites in UTR |
| PTGS2    | NM_000963    | prostaglandin-endoperoxide synthase 2 (prostaglandin G/H synthase and cyclooxygenase) | 0 | 0 | 0 | 0 | 1 | 0 | 0 | 1 | hsa-miR-622 | -0.08 | N/A | Sites in UTR |

|          |              |                                                                                   |   |   |   |   |   |   |   |   |             |       |     |              |
|----------|--------------|-----------------------------------------------------------------------------------|---|---|---|---|---|---|---|---|-------------|-------|-----|--------------|
| STAU1    | NM_001037328 | stauflen, RNA binding protein, homolog 1 (Drosophila)                             | 0 | 0 | 0 | 0 | 1 | 0 | 0 | 1 | hsa-miR-622 | -0.08 | N/A | Sites in UTR |
| SIX2     | NM_016932    | SIX homeobox 2                                                                    | 0 | 0 | 0 | 0 | 1 | 0 | 0 | 1 | hsa-miR-622 | -0.08 | N/A | Sites in UTR |
| WWTR1    | NM_001168278 | WW domain containing transcription regulator 1                                    | 0 | 0 | 0 | 0 | 1 | 0 | 0 | 1 | hsa-miR-622 | -0.08 | N/A | Sites in UTR |
| KIAA1274 | NM_014431    | KIAA1274                                                                          | 0 | 0 | 0 | 0 | 1 | 0 | 0 | 1 | hsa-miR-622 | -0.08 | N/A | Sites in UTR |
| ELTD1    | NM_022159    | EGF, latrophilin and seven transmembrane domain containing 1                      | 0 | 0 | 0 | 0 | 1 | 0 | 0 | 1 | hsa-miR-622 | -0.08 | N/A | Sites in UTR |
| PTPRB    | NM_001109754 | protein tyrosine phosphatase, receptor type, B                                    | 0 | 0 | 0 | 0 | 1 | 0 | 1 | 0 | hsa-miR-622 | -0.08 | N/A | Sites in UTR |
| MAN1A2   | NM_006699    | mannosidase, alpha, class 1A, member 2                                            | 1 | 0 | 1 | 0 | 0 | 0 | 0 | 0 | hsa-miR-622 | -0.08 | N/A | Sites in UTR |
| GNL3L    | NM_001184819 | guanine nucleotide binding protein-like 3 (nucleolar)-like                        | 0 | 0 | 0 | 0 | 1 | 0 | 1 | 0 | hsa-miR-622 | -0.08 | N/A | Sites in UTR |
| C18orf25 | NM_001008239 | chromosome 18 open reading frame 25                                               | 0 | 0 | 0 | 0 | 1 | 1 | 0 | 0 | hsa-miR-622 | -0.08 | N/A | Sites in UTR |
| DHFR     | NM_000791    | dihydrofolate reductase                                                           | 0 | 0 | 0 | 0 | 1 | 0 | 0 | 1 | hsa-miR-622 | -0.08 | N/A | Sites in UTR |
| NDUFS1   | NM_001199981 | NADH dehydrogenase (ubiquinone) Fe-S protein 1, 75kDa (NADH-coenzyme Q reductase) | 0 | 0 | 0 | 0 | 1 | 0 | 0 | 1 | hsa-miR-622 | -0.08 | N/A | Sites in UTR |
| WDR48    | NM_020839    | WD repeat domain 48                                                               | 0 | 0 | 0 | 0 | 1 | 0 | 0 | 1 | hsa-miR-622 | -0.08 | N/A | Sites in UTR |
| BAALC    | NM_001024372 | brain and acute leukemia, cytoplasmic                                             | 0 | 0 | 0 | 0 | 1 | 0 | 0 | 1 | hsa-miR-622 | -0.08 | N/A | Sites in UTR |
| LRRTM4   | NM_024993    | leucine rich repeat transmembrane neuronal 4                                      | 0 | 0 | 0 | 0 | 1 | 0 | 0 | 1 | hsa-miR-622 | -0.08 | N/A | Sites in UTR |
| TSGA13   | NM_052933    | testis specific, 13                                                               | 0 | 0 | 0 | 0 | 1 | 0 | 0 | 1 | hsa-miR-622 | -0.08 | N/A | Sites in UTR |
| AEBP2    | NM_153207    | AE binding protein 2                                                              | 0 | 0 | 0 | 0 | 1 | 0 | 0 | 1 | hsa-miR-622 | -0.08 | N/A | Sites in UTR |
| PCGF3    | NM_006315    | polycomb group ring finger 3                                                      | 0 | 0 | 0 | 0 | 1 | 0 | 1 | 0 | hsa-miR-622 | -0.08 | N/A | Sites in UTR |
| MLC1     | NM_015166    | megalencephalic leukoencephalopathy with subcortical cysts 1                      | 0 | 0 | 0 | 0 | 1 | 0 | 1 | 0 | hsa-miR-622 | -0.08 | N/A | Sites in UTR |



|          |              |                                                                                                       |   |   |   |   |   |   |   |   |             |       |     |              |
|----------|--------------|-------------------------------------------------------------------------------------------------------|---|---|---|---|---|---|---|---|-------------|-------|-----|--------------|
| TMEM104  | NM_017728    | transmembrane protein 104                                                                             | 0 | 0 | 0 | 0 | 1 | 0 | 1 | 0 | hsa-miR-622 | -0.08 | N/A | Sites in UTR |
| XPNPEP3  | NM_022098    | X-prolyl aminopeptidase (aminopeptidase P) 3, putative                                                | 0 | 0 | 0 | 0 | 1 | 0 | 1 | 0 | hsa-miR-622 | -0.08 | N/A | Sites in UTR |
| KRI1     | NM_023008    | KRI1 homolog ( <i>S. cerevisiae</i> )                                                                 | 0 | 0 | 0 | 0 | 1 | 0 | 1 | 0 | hsa-miR-622 | -0.08 | N/A | Sites in UTR |
| FOPNL    | NM_144600    | FGFR1OP N-terminal like                                                                               | 0 | 0 | 0 | 0 | 1 | 0 | 1 | 0 | hsa-miR-622 | -0.08 | N/A | Sites in UTR |
| JMY      | NM_152405    | junction mediating and regulatory protein, p53 cofactor                                               | 0 | 0 | 0 | 0 | 1 | 0 | 0 | 1 | hsa-miR-622 | -0.07 | N/A | Sites in UTR |
| ITGAL    | NM_001114380 | integrin, alpha L (antigen CD11A (p180), lymphocyte function-associated antigen 1; alpha polypeptide) | 0 | 0 | 0 | 0 | 1 | 0 | 0 | 1 | hsa-miR-622 | -0.07 | N/A | Sites in UTR |
| WNT11    | NM_004626    | wingless-type MMTV integration site family, member 11                                                 | 0 | 0 | 0 | 0 | 1 | 0 | 0 | 1 | hsa-miR-622 | -0.07 | N/A | Sites in UTR |
| TBK1     | NM_013254    | TANK-binding kinase 1                                                                                 | 0 | 0 | 0 | 0 | 1 | 0 | 0 | 1 | hsa-miR-622 | -0.07 | N/A | Sites in UTR |
| PRICKLE4 | NM_013397    | prickle homolog 4 ( <i>Drosophila</i> )                                                               | 0 | 0 | 0 | 0 | 1 | 0 | 0 | 1 | hsa-miR-622 | -0.07 | N/A | Sites in UTR |
| ZFYVE21  | NM_001198953 | zinc finger, FYVE domain containing 21                                                                | 0 | 0 | 0 | 0 | 1 | 0 | 0 | 1 | hsa-miR-622 | -0.07 | N/A | Sites in UTR |
| RNASEK   | NM_001004333 | ribonuclease, RNase K                                                                                 | 0 | 0 | 0 | 0 | 1 | 0 | 0 | 1 | hsa-miR-622 | -0.07 | N/A | Sites in UTR |
| ROR2     | NM_004560    | receptor tyrosine kinase-like orphan receptor 2                                                       | 0 | 0 | 0 | 0 | 1 | 0 | 1 | 0 | hsa-miR-622 | -0.07 | N/A | Sites in UTR |
| PHLDA3   | NM_012396    | pleckstrin homology-like domain, family A, member 3                                                   | 1 | 0 | 1 | 0 | 0 | 0 | 0 | 0 | hsa-miR-622 | -0.07 | N/A | Sites in UTR |
| DCDC2    | NM_001195610 | doublecortin domain containing 2                                                                      | 0 | 0 | 0 | 0 | 1 | 0 | 1 | 0 | hsa-miR-622 | -0.07 | N/A | Sites in UTR |
| PARP8    | NM_001178055 | poly (ADP-ribose) polymerase family, member 8                                                         | 0 | 0 | 0 | 0 | 1 | 0 | 1 | 0 | hsa-miR-622 | -0.07 | N/A | Sites in UTR |
| PRR3     | NM_001077497 | proline rich 3                                                                                        | 0 | 0 | 0 | 0 | 1 | 0 | 1 | 0 | hsa-miR-622 | -0.07 | N/A | Sites in UTR |
| FAM83C   | NM_178468    | family with sequence similarity 83, member C                                                          | 0 | 0 | 0 | 0 | 1 | 0 | 1 | 0 | hsa-miR-622 | -0.07 | N/A | Sites in UTR |
| ZNF506   | NM_001099269 | zinc finger protein 506                                                                               | 0 | 0 | 0 | 0 | 1 | 0 | 1 | 0 | hsa-miR-622 | -0.07 | N/A | Sites in UTR |

|              |              |                                                                  |   |   |   |   |   |   |   |   |             |       |     |              |
|--------------|--------------|------------------------------------------------------------------|---|---|---|---|---|---|---|---|-------------|-------|-----|--------------|
| ATXN7L3B     | NM_001136262 | ataxin 7-like 3B                                                 | 0 | 0 | 0 | 0 | 2 | 0 | 1 | 1 | hsa-miR-622 | -0.07 | N/A | Sites in UTR |
| SGCG         | NM_000231    | sarcoglycan, gamma (35kDa dystrophin-associated glycoprotein)    | 0 | 0 | 0 | 0 | 1 | 0 | 0 | 1 | hsa-miR-622 | -0.07 | N/A | Sites in UTR |
| SPRR2E       | NM_001024209 | small proline-rich protein 2E                                    | 0 | 0 | 0 | 0 | 1 | 0 | 0 | 1 | hsa-miR-622 | -0.07 | N/A | Sites in UTR |
| MFAP3L       | NM_001009554 | microfibrillar-associated protein 3-like                         | 0 | 0 | 0 | 0 | 1 | 0 | 0 | 1 | hsa-miR-622 | -0.07 | N/A | Sites in UTR |
| RPL13A       | NM_012423    | ribosomal protein L13a                                           | 0 | 0 | 0 | 0 | 1 | 0 | 0 | 1 | hsa-miR-622 | -0.07 | N/A | Sites in UTR |
| BCL2L13      | NM_015367    | BCL2-like 13 (apoptosis facilitator)                             | 0 | 0 | 0 | 0 | 1 | 0 | 0 | 1 | hsa-miR-622 | -0.07 | N/A | Sites in UTR |
| UBR5         | NM_015902    | ubiquitin protein ligase E3 component n-recognin 5               | 0 | 0 | 0 | 0 | 1 | 0 | 0 | 1 | hsa-miR-622 | -0.07 | N/A | Sites in UTR |
| ORAI3        | NM_152288    | ORAI calcium release-activated calcium modulator 3               | 0 | 0 | 0 | 0 | 1 | 0 | 0 | 1 | hsa-miR-622 | -0.07 | N/A | Sites in UTR |
| FBXO45       | NM_001105573 | F-box protein 45                                                 | 0 | 0 | 0 | 0 | 1 | 0 | 0 | 1 | hsa-miR-622 | -0.07 | N/A | Sites in UTR |
| TLX1         | NM_001195517 | T-cell leukemia homeobox 1                                       | 0 | 0 | 0 | 0 | 1 | 0 | 1 | 0 | hsa-miR-622 | -0.07 | N/A | Sites in UTR |
| IL4R         | NM_000418    | interleukin 4 receptor                                           | 0 | 0 | 0 | 0 | 1 | 0 | 1 | 0 | hsa-miR-622 | -0.07 | N/A | Sites in UTR |
| BRE          | NM_004899    | brain and reproductive organ-expressed (TNFRSF1A modulator)      | 0 | 0 | 0 | 0 | 1 | 0 | 1 | 0 | hsa-miR-622 | -0.07 | N/A | Sites in UTR |
| ICOSLG       | NM_015259    | inducible T-cell co-stimulator ligand                            | 0 | 0 | 0 | 0 | 1 | 0 | 1 | 0 | hsa-miR-622 | -0.07 | N/A | Sites in UTR |
| DNAJC11      | NM_018198    | DnaJ (Hsp40) homolog, subfamily C, member 11                     | 0 | 0 | 0 | 0 | 1 | 0 | 1 | 0 | hsa-miR-622 | -0.07 | N/A | Sites in UTR |
| CYP4V2       | NM_207352    | cytochrome P450, family 4, subfamily V, polypeptide 2            | 0 | 0 | 0 | 0 | 1 | 0 | 1 | 0 | hsa-miR-622 | -0.07 | N/A | Sites in UTR |
| ARL10        | NM_173664    | ADP-ribosylation factor-like 10                                  | 0 | 0 | 0 | 0 | 1 | 0 | 1 | 0 | hsa-miR-622 | -0.07 | N/A | Sites in UTR |
| LOC100293516 | NM_001204818 | zinc finger protein                                              | 0 | 0 | 0 | 0 | 1 | 0 | 1 | 0 | hsa-miR-622 | -0.07 | N/A | Sites in UTR |
| TLE3         | NM_001105192 | transducin-like enhancer of split 3 (E(sp1) homolog, Drosophila) | 0 | 0 | 0 | 0 | 1 | 1 | 0 | 0 | hsa-miR-622 | -0.07 | N/A | Sites in UTR |

|          |              |                                                                            |   |   |   |   |   |   |   |   |             |       |     |              |
|----------|--------------|----------------------------------------------------------------------------|---|---|---|---|---|---|---|---|-------------|-------|-----|--------------|
| EIF5     | NM_001969    | eukaryotic translation initiation factor 5                                 | 0 | 0 | 0 | 0 | 1 | 0 | 0 | 1 | hsa-miR-622 | -0.07 | N/A | Sites in UTR |
| FGFR3    | NM_000142    | fibroblast growth factor receptor 3                                        | 0 | 0 | 0 | 0 | 1 | 0 | 0 | 1 | hsa-miR-622 | -0.07 | N/A | Sites in UTR |
| ITGA6    | NM_000210    | integrin, alpha 6                                                          | 0 | 0 | 0 | 0 | 1 | 0 | 0 | 1 | hsa-miR-622 | -0.07 | N/A | Sites in UTR |
| PKD2     | NM_001199898 | pyruvate dehydrogenase kinase, isozyme 2                                   | 0 | 0 | 0 | 0 | 1 | 0 | 0 | 1 | hsa-miR-622 | -0.07 | N/A | Sites in UTR |
| RAD52    | NM_134424    | RAD52 homolog ( <i>S. cerevisiae</i> )                                     | 0 | 0 | 0 | 0 | 1 | 0 | 0 | 1 | hsa-miR-622 | -0.07 | N/A | Sites in UTR |
| SKAP2    | NM_003930    | src kinase associated phosphoprotein 2                                     | 0 | 0 | 0 | 0 | 1 | 0 | 0 | 1 | hsa-miR-622 | -0.07 | N/A | Sites in UTR |
| BZW1     | NM_001207067 | basic leucine zipper and W2 domains 1                                      | 0 | 0 | 0 | 0 | 1 | 0 | 0 | 1 | hsa-miR-622 | -0.07 | N/A | Sites in UTR |
| MGA      | NM_001080541 | MAX gene associated                                                        | 0 | 0 | 0 | 0 | 1 | 0 | 0 | 1 | hsa-miR-622 | -0.07 | N/A | Sites in UTR |
| PEX5L    | NM_016559    | peroxisomal biogenesis factor 5-like                                       | 0 | 0 | 0 | 0 | 1 | 0 | 0 | 1 | hsa-miR-622 | -0.07 | N/A | Sites in UTR |
| PDP1     | NM_001161778 | pyruvate dehydrogenase phosphatase catalytic subunit 1                     | 0 | 0 | 0 | 0 | 1 | 0 | 0 | 1 | hsa-miR-622 | -0.07 | N/A | Sites in UTR |
| BSDC1    | NM_001143888 | BSD domain containing 1                                                    | 0 | 0 | 0 | 0 | 1 | 0 | 0 | 1 | hsa-miR-622 | -0.07 | N/A | Sites in UTR |
| MLL3     | NM_170606    | myeloid/lymphoid or mixed-lineage leukemia 3                               | 1 | 0 | 0 | 1 | 0 | 0 | 0 | 0 | hsa-miR-622 | -0.07 | N/A | Sites in UTR |
| ERI1     | NM_153332    | exoribonuclease 1                                                          | 0 | 0 | 0 | 0 | 1 | 0 | 0 | 1 | hsa-miR-622 | -0.07 | N/A | Sites in UTR |
| RC3H1    | NM_172071    | ring finger and CCCH-type domains 1                                        | 0 | 0 | 0 | 0 | 1 | 0 | 0 | 1 | hsa-miR-622 | -0.07 | N/A | Sites in UTR |
| MOCS1    | NM_001075098 | molybdenum cofactor synthesis 1                                            | 0 | 0 | 0 | 0 | 1 | 0 | 1 | 0 | hsa-miR-622 | -0.07 | N/A | Sites in UTR |
| BATF3    | NM_018664    | basic leucine zipper transcription factor, ATF-like 3                      | 0 | 0 | 0 | 0 | 1 | 0 | 1 | 0 | hsa-miR-622 | -0.07 | N/A | Sites in UTR |
| MID1IP1  | NM_001098790 | MID1 interacting protein 1 (gastrulation specific G12 homolog (zebrafish)) | 0 | 0 | 0 | 0 | 1 | 0 | 1 | 0 | hsa-miR-622 | -0.07 | N/A | Sites in UTR |
| SLC25A43 | NM_145305    | solute carrier family 25, member 43                                        | 0 | 0 | 0 | 0 | 1 | 0 | 1 | 0 | hsa-miR-622 | -0.07 | N/A | Sites in UTR |

|          |              |                                                                                                |   |   |   |   |   |   |   |   |             |       |     |              |
|----------|--------------|------------------------------------------------------------------------------------------------|---|---|---|---|---|---|---|---|-------------|-------|-----|--------------|
| KCNIP3   | NM_001034914 | Kv channel interacting protein 3, calseinilin                                                  | 0 | 0 | 0 | 0 | 2 | 0 | 2 | 0 | hsa-miR-622 | -0.07 | N/A | Sites in UTR |
| WIPF3    | NM_001080529 | WAS/WASL interacting protein family, member 3                                                  | 0 | 0 | 0 | 0 | 1 | 1 | 0 | 0 | hsa-miR-622 | -0.07 | N/A | Sites in UTR |
| PAPD7    | NM_001171805 | PAP associated domain containing 7                                                             | 0 | 0 | 0 | 0 | 2 | 0 | 2 | 0 | hsa-miR-622 | -0.07 | N/A | Sites in UTR |
| GNAO1    | NM_138736    | guanine nucleotide binding protein (G protein), alpha activating activity polypeptide O        | 0 | 0 | 0 | 0 | 1 | 0 | 0 | 1 | hsa-miR-622 | -0.07 | N/A | Sites in UTR |
| SLC47A1  | NM_018242    | solute carrier family 47, member 1                                                             | 0 | 0 | 0 | 0 | 1 | 0 | 0 | 1 | hsa-miR-622 | -0.07 | N/A | Sites in UTR |
| STEAP4   | NM_001205315 | STEAP family member 4                                                                          | 0 | 0 | 0 | 0 | 1 | 0 | 0 | 1 | hsa-miR-622 | -0.07 | N/A | Sites in UTR |
| TMEM132D | NM_133448    | transmembrane protein 132D                                                                     | 0 | 0 | 0 | 0 | 1 | 0 | 0 | 1 | hsa-miR-622 | -0.07 | N/A | Sites in UTR |
| METAP1D  | NM_199227    | methionyl aminopeptidase type 1D (mitochondrial)                                               | 0 | 0 | 0 | 0 | 1 | 0 | 0 | 1 | hsa-miR-622 | -0.07 | N/A | Sites in UTR |
| NEO1     | NM_001172623 | neogenin 1                                                                                     | 0 | 0 | 0 | 0 | 1 | 0 | 1 | 0 | hsa-miR-622 | -0.07 | N/A | Sites in UTR |
| NEURL1B  | NM_001142651 | neuralized homolog 1B (Drosophila)                                                             | 0 | 0 | 0 | 0 | 1 | 0 | 1 | 0 | hsa-miR-622 | -0.07 | N/A | Sites in UTR |
| ASB13    | NM_024701    | ankyrin repeat and SOCS box containing 13                                                      | 0 | 0 | 0 | 0 | 1 | 0 | 1 | 0 | hsa-miR-622 | -0.07 | N/A | Sites in UTR |
| UNC119B  | NM_001080533 | unc-119 homolog B (C. elegans)                                                                 | 0 | 0 | 0 | 0 | 1 | 0 | 1 | 0 | hsa-miR-622 | -0.07 | N/A | Sites in UTR |
| MLLT6    | NM_005937    | myeloid/lymphoid or mixed-lineage leukemia (trithorax homolog, Drosophila); translocated to, 6 | 0 | 0 | 0 | 0 | 2 | 0 | 1 | 1 | hsa-miR-622 | -0.07 | N/A | Sites in UTR |
| PIP5K1C  | NM_001195733 | phosphatidylinositol-4-phosphate 5-kinase, type I, gamma                                       | 0 | 0 | 0 | 0 | 2 | 0 | 1 | 1 | hsa-miR-622 | -0.07 | N/A | Sites in UTR |
| EXD2     | NM_001193360 | exonuclease 3'-5' domain containing 2                                                          | 0 | 0 | 0 | 0 | 3 | 0 | 1 | 2 | hsa-miR-622 | -0.07 | N/A | Sites in UTR |
| ATP5G3   | NM_001002258 | ATP synthase, H+ transporting, mitochondrial Fo complex, subunit C3 (subunit 9)                | 0 | 0 | 0 | 0 | 1 | 0 | 0 | 1 | hsa-miR-622 | -0.07 | N/A | Sites in UTR |
| FUT1     | NM_000148    | fucosyltransferase 1 (galactoside 2-alpha-L-fucosyltransferase, H blood group)                 | 0 | 0 | 0 | 0 | 1 | 0 | 0 | 1 | hsa-miR-622 | -0.07 | N/A | Sites in UTR |
| IL17A    | NM_002190    | interleukin 17A                                                                                | 0 | 0 | 0 | 0 | 1 | 0 | 0 | 1 | hsa-miR-622 | -0.07 | N/A | Sites in UTR |

|          |              |                                                          |   |   |   |   |   |   |   |   |             |       |     |              |
|----------|--------------|----------------------------------------------------------|---|---|---|---|---|---|---|---|-------------|-------|-----|--------------|
| RFXAP    | NM_000538    | regulatory factor X-associated protein                   | 0 | 0 | 0 | 0 | 1 | 0 | 0 | 1 | hsa-miR-622 | -0.07 | N/A | Sites in UTR |
| TCF4     | NM_001083962 | transcription factor 4                                   | 0 | 0 | 0 | 0 | 1 | 0 | 0 | 1 | hsa-miR-622 | -0.07 | N/A | Sites in UTR |
| RECQL5   | NM_001003715 | RecQ protein-like 5                                      | 0 | 0 | 0 | 0 | 1 | 0 | 0 | 1 | hsa-miR-622 | -0.07 | N/A | Sites in UTR |
| RNF139   | NM_007218    | ring finger protein 139                                  | 0 | 0 | 0 | 0 | 1 | 0 | 0 | 1 | hsa-miR-622 | -0.07 | N/A | Sites in UTR |
| ZFP30    | NM_014898    | zinc finger protein 30 homolog (mouse)                   | 0 | 0 | 0 | 0 | 1 | 0 | 0 | 1 | hsa-miR-622 | -0.07 | N/A | Sites in UTR |
| C12orf4  | NM_020374    | chromosome 12 open reading frame 4                       | 0 | 0 | 0 | 0 | 1 | 0 | 0 | 1 | hsa-miR-622 | -0.07 | N/A | Sites in UTR |
| ZFP90    | NM_133458    | zinc finger protein 90 homolog (mouse)                   | 0 | 0 | 0 | 0 | 1 | 0 | 0 | 1 | hsa-miR-622 | -0.07 | N/A | Sites in UTR |
| GPS1     | NM_004127    | G protein pathway suppressor 1                           | 0 | 0 | 0 | 0 | 1 | 0 | 1 | 0 | hsa-miR-622 | -0.07 | N/A | Sites in UTR |
| IPOS     | NM_002271    | importin 5                                               | 0 | 0 | 0 | 0 | 1 | 0 | 1 | 0 | hsa-miR-622 | -0.07 | N/A | Sites in UTR |
| MAP4     | NM_030885    | microtubule-associated protein 4                         | 0 | 0 | 0 | 0 | 1 | 0 | 1 | 0 | hsa-miR-622 | -0.07 | N/A | Sites in UTR |
| POLR2L   | NM_021128    | polymerase (RNA) II (DNA directed) polypeptide L, 7.6kDa | 0 | 0 | 0 | 0 | 1 | 0 | 1 | 0 | hsa-miR-622 | -0.07 | N/A | Sites in UTR |
| RRP1B    | NM_015056    | ribosomal RNA processing 1 homolog B (S. cerevisiae)     | 0 | 0 | 0 | 0 | 1 | 1 | 0 | 0 | hsa-miR-622 | -0.07 | N/A | Sites in UTR |
| DRG2     | NM_001388    | developmentally regulated GTP binding protein 2          | 0 | 0 | 0 | 0 | 1 | 0 | 0 | 1 | hsa-miR-622 | -0.07 | N/A | Sites in UTR |
| MSR1     | NM_002445    | macrophage scavenger receptor 1                          | 0 | 0 | 0 | 0 | 1 | 0 | 0 | 1 | hsa-miR-622 | -0.07 | N/A | Sites in UTR |
| SAP18    | NM_005870    | Sin3A-associated protein, 18kDa                          | 0 | 0 | 0 | 0 | 1 | 0 | 0 | 1 | hsa-miR-622 | -0.07 | N/A | Sites in UTR |
| RGL1     | NM_015149    | ral guanine nucleotide dissociation stimulator-like 1    | 0 | 0 | 0 | 0 | 1 | 0 | 0 | 1 | hsa-miR-622 | -0.07 | N/A | Sites in UTR |
| TPK1     | NM_001042482 | thiamin pyrophosphokinase 1                              | 0 | 0 | 0 | 0 | 1 | 0 | 0 | 1 | hsa-miR-622 | -0.07 | N/A | Sites in UTR |
| SLC22A17 | NM_016609    | solute carrier family 22, member 17                      | 0 | 0 | 0 | 0 | 1 | 0 | 0 | 1 | hsa-miR-622 | -0.07 | N/A | Sites in UTR |

|         |              |                                                                   |   |   |   |   |   |   |   |   |             |       |     |              |
|---------|--------------|-------------------------------------------------------------------|---|---|---|---|---|---|---|---|-------------|-------|-----|--------------|
| MTFP1   | NM_001003704 | mitochondrial fission process 1                                   | 0 | 0 | 0 | 0 | 1 | 0 | 0 | 1 | hsa-miR-622 | -0.07 | N/A | Sites in UTR |
| FAM204A | NM_001134672 | family with sequence similarity 204, member A                     | 0 | 0 | 0 | 0 | 1 | 0 | 0 | 1 | hsa-miR-622 | -0.07 | N/A | Sites in UTR |
| GPBP1   | NM_001127235 | GC-rich promoter binding protein 1                                | 0 | 0 | 0 | 0 | 1 | 0 | 0 | 1 | hsa-miR-622 | -0.07 | N/A | Sites in UTR |
| SLCO5A1 | NM_001146008 | solute carrier organic anion transporter family, member 5A1       | 0 | 0 | 0 | 0 | 1 | 0 | 0 | 1 | hsa-miR-622 | -0.07 | N/A | Sites in UTR |
| C6orf89 | NM_152734    | chromosome 6 open reading frame 89                                | 0 | 0 | 0 | 0 | 1 | 0 | 0 | 1 | hsa-miR-622 | -0.07 | N/A | Sites in UTR |
| COL1A1  | NM_000088    | collagen, type I, alpha 1                                         | 0 | 0 | 0 | 0 | 1 | 0 | 1 | 0 | hsa-miR-622 | -0.07 | N/A | Sites in UTR |
| FLI1    | NM_001167681 | Friend leukemia virus integration 1                               | 0 | 0 | 0 | 0 | 1 | 0 | 1 | 0 | hsa-miR-622 | -0.07 | N/A | Sites in UTR |
| NINJ1   | NM_004148    | ninjurin 1                                                        | 0 | 0 | 0 | 0 | 1 | 0 | 1 | 0 | hsa-miR-622 | -0.07 | N/A | Sites in UTR |
| FAM65B  | NM_014722    | family with sequence similarity 65, member B                      | 0 | 0 | 0 | 0 | 1 | 0 | 1 | 0 | hsa-miR-622 | -0.07 | N/A | Sites in UTR |
| TNK2    | NM_001010938 | tyrosine kinase, non-receptor, 2                                  | 0 | 0 | 0 | 0 | 1 | 0 | 1 | 0 | hsa-miR-622 | -0.07 | N/A | Sites in UTR |
| STX3    | NM_001178040 | syntaxin 3                                                        | 0 | 0 | 0 | 0 | 1 | 1 | 0 | 0 | hsa-miR-622 | -0.07 | N/A | Sites in UTR |
| NAA50   | NM_025146    | N(alpha)-acetyltransferase 50, NatE catalytic subunit             | 0 | 0 | 0 | 0 | 3 | 1 | 0 | 2 | hsa-miR-622 | -0.07 | N/A | Sites in UTR |
| LIMK2   | NM_005569    | LIM domain kinase 2                                               | 0 | 0 | 0 | 0 | 1 | 0 | 0 | 1 | hsa-miR-622 | -0.07 | N/A | Sites in UTR |
| MTRR    | NM_002454    | 5-methyltetrahydrofolate-homocysteine methyltransferase reductase | 0 | 0 | 0 | 0 | 1 | 0 | 0 | 1 | hsa-miR-622 | -0.07 | N/A | Sites in UTR |
| SPRR2B  | NM_001017418 | small proline-rich protein 2B                                     | 0 | 0 | 0 | 0 | 1 | 0 | 0 | 1 | hsa-miR-622 | -0.07 | N/A | Sites in UTR |
| TRAM1   | NM_014294    | translocation associated membrane protein 1                       | 0 | 0 | 0 | 0 | 1 | 0 | 0 | 1 | hsa-miR-622 | -0.07 | N/A | Sites in UTR |
| TINF2   | NM_012461    | TERF1 (TRF1)-interacting nuclear factor 2                         | 0 | 0 | 0 | 0 | 1 | 0 | 0 | 1 | hsa-miR-622 | -0.07 | N/A | Sites in UTR |
| BCL11B  | NM_022898    | B-cell CLL/lymphoma 11B (zinc finger protein)                     | 0 | 0 | 0 | 0 | 1 | 0 | 0 | 1 | hsa-miR-622 | -0.07 | N/A | Sites in UTR |

|         |              |                                                                                           |   |   |   |   |   |   |   |   |             |       |     |              |
|---------|--------------|-------------------------------------------------------------------------------------------|---|---|---|---|---|---|---|---|-------------|-------|-----|--------------|
| SFXN5   | NM_144579    | sideroflexin 5                                                                            | 0 | 0 | 0 | 0 | 1 | 0 | 0 | 1 | hsa-miR-622 | -0.07 | N/A | Sites in UTR |
| TMEM188 | NM_153261    | transmembrane protein 188                                                                 | 0 | 0 | 0 | 0 | 1 | 0 | 0 | 1 | hsa-miR-622 | -0.07 | N/A | Sites in UTR |
| SSTR3   | NM_001051    | somatostatin receptor 3                                                                   | 0 | 0 | 0 | 0 | 1 | 0 | 1 | 0 | hsa-miR-622 | -0.07 | N/A | Sites in UTR |
| TRIOBP  | NM_001039141 | TRIO and F-actin binding protein                                                          | 0 | 0 | 0 | 0 | 1 | 0 | 1 | 0 | hsa-miR-622 | -0.07 | N/A | Sites in UTR |
| PHLPP2  | NM_015020    | PH domain and leucine rich repeat protein phosphatase 2                                   | 0 | 0 | 0 | 0 | 1 | 0 | 1 | 0 | hsa-miR-622 | -0.07 | N/A | Sites in UTR |
| GLYCK   | NM_145262    | glycerate kinase                                                                          | 0 | 0 | 0 | 0 | 1 | 0 | 1 | 0 | hsa-miR-622 | -0.07 | N/A | Sites in UTR |
| SHISA4  | NM_198149    | shisa homolog 4 ( <i>Xenopus laevis</i> )                                                 | 0 | 0 | 0 | 0 | 1 | 0 | 1 | 0 | hsa-miR-622 | -0.07 | N/A | Sites in UTR |
| NXP3    | NM_007225    | neurexophilin 3                                                                           | 0 | 0 | 0 | 0 | 2 | 1 | 1 | 0 | hsa-miR-622 | -0.07 | N/A | Sites in UTR |
| H2AFV   | NM_138635    | H2A histone family, member V                                                              | 0 | 0 | 0 | 0 | 2 | 0 | 2 | 0 | hsa-miR-622 | -0.07 | N/A | Sites in UTR |
| IRAK2   | NM_001570    | interleukin-1 receptor-associated kinase 2                                                | 0 | 0 | 0 | 0 | 1 | 0 | 0 | 1 | hsa-miR-622 | -0.07 | N/A | Sites in UTR |
| ACCS    | NM_001127219 | 1-aminocyclopropane-1-carboxylate synthase homolog ( <i>Arabidopsis</i> )(non-functional) | 0 | 0 | 0 | 0 | 1 | 0 | 0 | 1 | hsa-miR-622 | -0.07 | N/A | Sites in UTR |
| EDARADD | NM_080738    | EDAR-associated death domain                                                              | 0 | 0 | 0 | 0 | 1 | 0 | 0 | 1 | hsa-miR-622 | -0.07 | N/A | Sites in UTR |
| RP56KB1 | NM_003161    | ribosomal protein S6 kinase, 70kDa, polypeptide 1                                         | 0 | 0 | 0 | 0 | 1 | 0 | 1 | 0 | hsa-miR-622 | -0.07 | N/A | Sites in UTR |
| FAM127B | NM_001078172 | family with sequence similarity 127, member B                                             | 0 | 0 | 0 | 0 | 1 | 0 | 1 | 0 | hsa-miR-622 | -0.07 | N/A | Sites in UTR |
| CCDC149 | NM_001130726 | coiled-coil domain containing 149                                                         | 0 | 0 | 0 | 0 | 1 | 0 | 1 | 0 | hsa-miR-622 | -0.07 | N/A | Sites in UTR |
| ERLIN1  | NM_001100626 | ER lipid raft associated 1                                                                | 0 | 0 | 0 | 0 | 1 | 0 | 0 | 1 | hsa-miR-622 | -0.07 | N/A | Sites in UTR |
| CPPED1  | NM_001099455 | calcineurin-like phosphoesterase domain containing 1                                      | 0 | 0 | 0 | 0 | 1 | 0 | 0 | 1 | hsa-miR-622 | -0.07 | N/A | Sites in UTR |
| UBFD1   | NM_019116    | ubiquitin family domain containing 1                                                      | 1 | 0 | 0 | 1 | 0 | 0 | 0 | 0 | hsa-miR-622 | -0.07 | N/A | Sites in UTR |

|          |              |                                                                                                               |   |   |   |   |   |   |   |   |             |       |     |              |
|----------|--------------|---------------------------------------------------------------------------------------------------------------|---|---|---|---|---|---|---|---|-------------|-------|-----|--------------|
| KCMF1    | NM_020122    | potassium channel modulatory factor 1                                                                         | 0 | 0 | 0 | 0 | 1 | 0 | 0 | 1 | hsa-miR-622 | -0.07 | N/A | Sites in UTR |
| ABLIM2   | NM_001130088 | actin binding LIM protein family, member 2                                                                    | 0 | 0 | 0 | 0 | 1 | 0 | 0 | 1 | hsa-miR-622 | -0.07 | N/A | Sites in UTR |
| LGALS12  | NM_001142535 | lectin, galactoside-binding, soluble, 12                                                                      | 0 | 0 | 0 | 0 | 1 | 0 | 0 | 1 | hsa-miR-622 | -0.07 | N/A | Sites in UTR |
| UBXN10   | NM_152376    | UBX domain protein 10                                                                                         | 0 | 0 | 0 | 0 | 1 | 0 | 0 | 1 | hsa-miR-622 | -0.07 | N/A | Sites in UTR |
| SMAD4    | NM_005359    | SMAD family member 4                                                                                          | 0 | 0 | 0 | 0 | 1 | 0 | 1 | 0 | hsa-miR-622 | -0.07 | N/A | Sites in UTR |
| BZRAP1   | NM_004758    | benzodiazepine receptor (peripheral) associated protein 1                                                     | 0 | 0 | 0 | 0 | 1 | 0 | 1 | 0 | hsa-miR-622 | -0.07 | N/A | Sites in UTR |
| C5orf4   | NM_032385    | chromosome 5 open reading frame 4                                                                             | 0 | 0 | 0 | 0 | 1 | 0 | 1 | 0 | hsa-miR-622 | -0.07 | N/A | Sites in UTR |
| GADD45G  | NM_006705    | growth arrest and DNA-damage-inducible, gamma                                                                 | 0 | 0 | 0 | 0 | 1 | 0 | 1 | 0 | hsa-miR-622 | -0.07 | N/A | Sites in UTR |
| SND1     | NM_014390    | staphylococcal nuclease and tudor domain containing 1                                                         | 0 | 0 | 0 | 0 | 1 | 0 | 1 | 0 | hsa-miR-622 | -0.07 | N/A | Sites in UTR |
| SCML4    | NM_198081    | sex comb on midleg-like 4 (Drosophila)                                                                        | 1 | 0 | 1 | 0 | 0 | 0 | 0 | 0 | hsa-miR-622 | -0.07 | N/A | Sites in UTR |
| FIGNL2   | NM_001013690 | fidgetin-like 2                                                                                               | 0 | 0 | 0 | 0 | 1 | 0 | 1 | 0 | hsa-miR-622 | -0.07 | N/A | Sites in UTR |
| TIMM8A   | NM_001145951 | translocase of inner mitochondrial membrane 8 homolog A (yeast)                                               | 0 | 0 | 0 | 0 | 1 | 0 | 0 | 1 | hsa-miR-622 | -0.07 | N/A | Sites in UTR |
| ITPRIP   | NM_033397    | inositol 1,4,5-trisphosphate receptor interacting protein                                                     | 0 | 0 | 0 | 0 | 1 | 0 | 0 | 1 | hsa-miR-622 | -0.07 | N/A | Sites in UTR |
| FAM59B   | NM_001168241 | family with sequence similarity 59, member B                                                                  | 0 | 0 | 0 | 0 | 1 | 0 | 0 | 1 | hsa-miR-622 | -0.07 | N/A | Sites in UTR |
| C9orf163 | NM_152571    | chromosome 9 open reading frame 163                                                                           | 0 | 0 | 0 | 0 | 1 | 0 | 0 | 1 | hsa-miR-622 | -0.07 | N/A | Sites in UTR |
| FLJ44635 | NM_207422    | TPT1-like protein                                                                                             | 0 | 0 | 0 | 0 | 1 | 0 | 0 | 1 | hsa-miR-622 | -0.07 | N/A | Sites in UTR |
| DPAGT1   | NM_001382    | dolichyl-phosphate (UDP-N-acetylglucosamine) N-acetylglucosaminephosphotransferase 1 (GlcNAc-1-P transferase) | 0 | 0 | 0 | 0 | 1 | 0 | 1 | 0 | hsa-miR-622 | -0.07 | N/A | Sites in UTR |
| CPSF2    | NM_017437    | cleavage and polyadenylation specific factor 2, 100kDa                                                        | 0 | 0 | 0 | 0 | 1 | 0 | 1 | 0 | hsa-miR-622 | -0.07 | N/A | Sites in UTR |



|         |              |                                                       |   |   |   |   |   |   |   |   |             |       |     |              |
|---------|--------------|-------------------------------------------------------|---|---|---|---|---|---|---|---|-------------|-------|-----|--------------|
| ASPHD2  | NM_020437    | aspartate beta-hydroxylase domain containing 2        | 0 | 0 | 0 | 0 | 1 | 0 | 1 | 0 | hsa-miR-622 | -0.07 | N/A | Sites in UTR |
| ZSWIM4  | NM_023072    | zinc finger, SWIM-type containing 4                   | 0 | 0 | 0 | 0 | 1 | 0 | 1 | 0 | hsa-miR-622 | -0.07 | N/A | Sites in UTR |
| SPTB    | NM_001024858 | spectrin, beta, erythrocytic                          | 0 | 0 | 0 | 0 | 2 | 0 | 1 | 1 | hsa-miR-622 | -0.07 | N/A | Sites in UTR |
| CREBZF  | NM_001039618 | CREB/ATF bZIP transcription factor                    | 0 | 0 | 0 | 0 | 2 | 0 | 1 | 1 | hsa-miR-622 | -0.07 | N/A | Sites in UTR |
| BMP6    | NM_001718    | bone morphogenetic protein 6                          | 0 | 0 | 0 | 0 | 1 | 0 | 0 | 1 | hsa-miR-622 | -0.07 | N/A | Sites in UTR |
| IL1RAP  | NM_001167928 | interleukin 1 receptor accessory protein              | 0 | 0 | 0 | 0 | 1 | 0 | 0 | 1 | hsa-miR-622 | -0.07 | N/A | Sites in UTR |
| RPA1    | NM_002945    | replication protein A1, 70kDa                         | 1 | 0 | 0 | 1 | 0 | 0 | 0 | 0 | hsa-miR-622 | -0.07 | N/A | Sites in UTR |
| LEFTY2  | NM_001172425 | left-right determination factor 2                     | 0 | 0 | 0 | 0 | 1 | 0 | 0 | 1 | hsa-miR-622 | -0.07 | N/A | Sites in UTR |
| NTN1    | NM_004822    | netrin 1                                              | 0 | 0 | 0 | 0 | 1 | 0 | 0 | 1 | hsa-miR-622 | -0.07 | N/A | Sites in UTR |
| ASCC3   | NM_022091    | activating signal cointegrator 1 complex subunit 3    | 0 | 0 | 0 | 0 | 1 | 0 | 0 | 1 | hsa-miR-622 | -0.07 | N/A | Sites in UTR |
| C2orf18 | NM_017877    | chromosome 2 open reading frame 18                    | 0 | 0 | 0 | 0 | 1 | 0 | 0 | 1 | hsa-miR-622 | -0.07 | N/A | Sites in UTR |
| TMEM108 | NM_001136469 | transmembrane protein 108                             | 0 | 0 | 0 | 0 | 1 | 0 | 0 | 1 | hsa-miR-622 | -0.07 | N/A | Sites in UTR |
| LIN28A  | NM_024674    | lin-28 homolog A (C. elegans)                         | 0 | 0 | 0 | 0 | 1 | 0 | 0 | 1 | hsa-miR-622 | -0.07 | N/A | Sites in UTR |
| SPRED2  | NM_001128210 | sprouty-related, EVH1 domain containing 2             | 0 | 0 | 0 | 0 | 1 | 0 | 0 | 1 | hsa-miR-622 | -0.07 | N/A | Sites in UTR |
| ARGFX   | NM_001012659 | arginine-fifty homeobox                               | 0 | 0 | 0 | 0 | 1 | 0 | 0 | 1 | hsa-miR-622 | -0.07 | N/A | Sites in UTR |
| NAP1L1  | NM_004537    | nucleosome assembly protein 1-like 1                  | 0 | 0 | 0 | 0 | 1 | 0 | 1 | 0 | hsa-miR-622 | -0.07 | N/A | Sites in UTR |
| TBC1D24 | NM_001199107 | TBC1 domain family, member 24                         | 0 | 0 | 0 | 0 | 1 | 0 | 1 | 0 | hsa-miR-622 | -0.07 | N/A | Sites in UTR |
| CPEB2   | NM_001177381 | cytoplasmic polyadenylation element binding protein 2 | 1 | 0 | 1 | 0 | 0 | 0 | 0 | 0 | hsa-miR-622 | -0.07 | N/A | Sites in UTR |

|          |              |                                                                                         |   |   |   |   |   |   |   |   |             |       |     |              |
|----------|--------------|-----------------------------------------------------------------------------------------|---|---|---|---|---|---|---|---|-------------|-------|-----|--------------|
| SLC25A15 | NM_014252    | solute carrier family 25 (mitochondrial carrier; ornithine transporter) member 15       | 0 | 0 | 0 | 0 | 2 | 0 | 2 | 0 | hsa-miR-622 | -0.06 | N/A | Sites in UTR |
| SOBP     | NM_018013    | sine oculis binding protein homolog (Drosophila)                                        | 0 | 0 | 0 | 0 | 1 | 0 | 0 | 1 | hsa-miR-622 | -0.06 | N/A | Sites in UTR |
| CDH23    | NM_052836    | cadherin-related 23                                                                     | 0 | 0 | 0 | 0 | 1 | 0 | 0 | 1 | hsa-miR-622 | -0.06 | N/A | Sites in UTR |
| TMEM182  | NM_144632    | transmembrane protein 182                                                               | 0 | 0 | 0 | 0 | 1 | 0 | 0 | 1 | hsa-miR-622 | -0.06 | N/A | Sites in UTR |
| FAM19A2  | NM_178539    | family with sequence similarity 19 (chemokine (C-C motif)-like), member A2              | 0 | 0 | 0 | 0 | 1 | 0 | 0 | 1 | hsa-miR-622 | -0.06 | N/A | Sites in UTR |
| ACVR1B   | NM_004302    | activin A receptor, type IB                                                             | 0 | 0 | 0 | 0 | 1 | 0 | 1 | 0 | hsa-miR-622 | -0.06 | N/A | Sites in UTR |
| ST3GAL1  | NM_003033    | ST3 beta-galactoside alpha-2,3-sialyltransferase 1                                      | 1 | 0 | 1 | 0 | 0 | 0 | 0 | 0 | hsa-miR-622 | -0.06 | N/A | Sites in UTR |
| SLC6A1   | NM_003042    | solute carrier family 6 (neurotransmitter transporter, GABA), member 1                  | 0 | 0 | 0 | 0 | 1 | 0 | 1 | 0 | hsa-miR-622 | -0.06 | N/A | Sites in UTR |
| CECR2    | NM_031413    | cat eye syndrome chromosome region, candidate 2                                         | 0 | 0 | 0 | 0 | 1 | 0 | 1 | 0 | hsa-miR-622 | -0.06 | N/A | Sites in UTR |
| SYS1     | NM_001099791 | SYS1 Golgi-localized integral membrane protein homolog (S. cerevisiae)                  | 0 | 0 | 0 | 0 | 1 | 0 | 1 | 0 | hsa-miR-622 | -0.06 | N/A | Sites in UTR |
| SNX19    | NM_014758    | sorting nexin 19                                                                        | 0 | 0 | 0 | 0 | 2 | 0 | 1 | 1 | hsa-miR-622 | -0.06 | N/A | Sites in UTR |
| ZMYM2    | NM_001190964 | zinc finger, MYM-type 2                                                                 | 1 | 1 | 0 | 0 | 1 | 0 | 0 | 1 | hsa-miR-622 | -0.06 | N/A | Sites in UTR |
| EPHB3    | NM_004443    | EPH receptor B3                                                                         | 0 | 0 | 0 | 0 | 1 | 0 | 0 | 1 | hsa-miR-622 | -0.06 | N/A | Sites in UTR |
| VAPB     | NM_001195677 | VAMP (vesicle-associated membrane protein)-associated protein B and C                   | 0 | 0 | 0 | 0 | 1 | 0 | 0 | 1 | hsa-miR-622 | -0.06 | N/A | Sites in UTR |
| NCOR1    | NM_001190440 | nuclear receptor corepressor 1                                                          | 0 | 0 | 0 | 0 | 1 | 0 | 0 | 1 | hsa-miR-622 | -0.06 | N/A | Sites in UTR |
| JOSD1    | NM_014876    | Josephin domain containing 1                                                            | 0 | 0 | 0 | 0 | 1 | 0 | 0 | 1 | hsa-miR-622 | -0.06 | N/A | Sites in UTR |
| GALNTL1  | NM_001168368 | UDP-N-acetyl-alpha-D-galactosamine:polypeptide N-acetylgalactosaminyltransferase-like 1 | 0 | 0 | 0 | 0 | 1 | 0 | 0 | 1 | hsa-miR-622 | -0.06 | N/A | Sites in UTR |
| MOSC1    | NM_022746    | MOCO sulphurase C-terminal domain containing 1                                          | 0 | 0 | 0 | 0 | 1 | 0 | 0 | 1 | hsa-miR-622 | -0.06 | N/A | Sites in UTR |

|         |              |                                                                                                      |   |   |   |   |   |   |   |   |             |       |     |              |
|---------|--------------|------------------------------------------------------------------------------------------------------|---|---|---|---|---|---|---|---|-------------|-------|-----|--------------|
| MMP28   | NM_024302    | matrix metalloproteinase 28                                                                          | 0 | 0 | 0 | 0 | 1 | 0 | 0 | 1 | hsa-miR-622 | -0.06 | N/A | Sites in UTR |
| TMX1    | NM_030755    | thioredoxin-related transmembrane protein 1                                                          | 0 | 0 | 0 | 0 | 1 | 0 | 0 | 1 | hsa-miR-622 | -0.06 | N/A | Sites in UTR |
| LRIT2   | NM_001017924 | leucine-rich repeat, immunoglobulin-like and transmembrane domains 2                                 | 0 | 0 | 0 | 0 | 1 | 0 | 0 | 1 | hsa-miR-622 | -0.06 | N/A | Sites in UTR |
| POLR2D  | NM_004805    | polymerase (RNA) II (DNA directed) polypeptide D                                                     | 0 | 0 | 0 | 0 | 1 | 0 | 1 | 0 | hsa-miR-622 | -0.06 | N/A | Sites in UTR |
| RGS11   | NM_003834    | regulator of G-protein signaling 11                                                                  | 0 | 0 | 0 | 0 | 1 | 0 | 1 | 0 | hsa-miR-622 | -0.06 | N/A | Sites in UTR |
| ZSCAN22 | NM_181846    | zinc finger and SCAN domain containing 22                                                            | 0 | 0 | 0 | 0 | 2 | 0 | 0 | 2 | hsa-miR-622 | -0.06 | N/A | Sites in UTR |
| GFI1    | NM_001127215 | growth factor independent 1 transcription repressor                                                  | 0 | 0 | 0 | 0 | 1 | 0 | 0 | 1 | hsa-miR-622 | -0.06 | N/A | Sites in UTR |
| SPRR2F  | NM_001014450 | small proline-rich protein 2F                                                                        | 0 | 0 | 0 | 0 | 1 | 0 | 0 | 1 | hsa-miR-622 | -0.06 | N/A | Sites in UTR |
| EML2    | NM_001193268 | echinoderm microtubule associated protein like 2                                                     | 0 | 0 | 0 | 0 | 1 | 0 | 0 | 1 | hsa-miR-622 | -0.06 | N/A | Sites in UTR |
| HCAR1   | NM_032554    | hydroxycarboxylic acid receptor 1                                                                    | 0 | 0 | 0 | 0 | 1 | 0 | 0 | 1 | hsa-miR-622 | -0.06 | N/A | Sites in UTR |
| CPNE8   | NM_153634    | copine VIII                                                                                          | 0 | 0 | 0 | 0 | 1 | 0 | 0 | 1 | hsa-miR-622 | -0.06 | N/A | Sites in UTR |
| C8orf74 | NM_001040032 | chromosome 8 open reading frame 74                                                                   | 0 | 0 | 0 | 0 | 1 | 0 | 0 | 1 | hsa-miR-622 | -0.06 | N/A | Sites in UTR |
| MAPK11  | NM_002751    | mitogen-activated protein kinase 11                                                                  | 0 | 0 | 0 | 0 | 1 | 0 | 1 | 0 | hsa-miR-622 | -0.06 | N/A | Sites in UTR |
| UBE3B   | NM_130466    | ubiquitin protein ligase E3B                                                                         | 0 | 0 | 0 | 0 | 1 | 0 | 1 | 0 | hsa-miR-622 | -0.06 | N/A | Sites in UTR |
| C3orf62 | NM_198562    | chromosome 3 open reading frame 62                                                                   | 0 | 0 | 0 | 0 | 2 | 0 | 1 | 1 | hsa-miR-622 | -0.06 | N/A | Sites in UTR |
| CLASP1  | NM_001142273 | cytoplasmic linker associated protein 1                                                              | 0 | 0 | 0 | 0 | 2 | 0 | 1 | 1 | hsa-miR-622 | -0.06 | N/A | Sites in UTR |
| SRD5A2  | NM_000348    | steroid-5-alpha-reductase, alpha polypeptide 2 (3-oxo-5 alpha-steroid delta 4-dehydrogenase alpha 2) | 0 | 0 | 0 | 0 | 1 | 0 | 0 | 1 | hsa-miR-622 | -0.06 | N/A | Sites in UTR |
| WARS2   | NM_015836    | tryptophanyl tRNA synthetase 2, mitochondrial                                                        | 0 | 0 | 0 | 0 | 1 | 0 | 0 | 1 | hsa-miR-622 | -0.06 | N/A | Sites in UTR |

|          |              |                                                             |   |   |   |   |   |   |   |   |             |       |     |              |
|----------|--------------|-------------------------------------------------------------|---|---|---|---|---|---|---|---|-------------|-------|-----|--------------|
| ZDHC23   | NM_173570    | zinc finger, DHHC-type containing 23                        | 0 | 0 | 0 | 0 | 1 | 0 | 0 | 1 | hsa-miR-622 | -0.06 | N/A | Sites in UTR |
| C1orf229 | NM_207401    | chromosome 1 open reading frame 229                         | 0 | 0 | 0 | 0 | 1 | 0 | 0 | 1 | hsa-miR-622 | -0.06 | N/A | Sites in UTR |
| ADAM8    | NM_001109    | ADAM metallopeptidase domain 8                              | 0 | 0 | 0 | 0 | 1 | 0 | 1 | 0 | hsa-miR-622 | -0.06 | N/A | Sites in UTR |
| IGF2     | NM_000612    | insulin-like growth factor 2 (somatomedin A)                | 0 | 0 | 0 | 0 | 1 | 0 | 1 | 0 | hsa-miR-622 | -0.06 | N/A | Sites in UTR |
| CLIC5    | NM_001114086 | chloride intracellular channel 5                            | 0 | 0 | 0 | 0 | 1 | 0 | 1 | 0 | hsa-miR-622 | -0.06 | N/A | Sites in UTR |
| ZNF845   | NM_138374    | zinc finger protein 845                                     | 0 | 0 | 0 | 0 | 1 | 0 | 1 | 0 | hsa-miR-622 | -0.06 | N/A | Sites in UTR |
| ATG9B    | NM_173681    | ATG9 autophagy related 9 homolog B ( <i>S. cerevisiae</i> ) | 0 | 0 | 0 | 0 | 1 | 0 | 1 | 0 | hsa-miR-622 | -0.06 | N/A | Sites in UTR |
| MTHFR    | NM_005957    | methylenetetrahydrofolate reductase (NAD(P)H)               | 0 | 0 | 0 | 0 | 2 | 0 | 1 | 1 | hsa-miR-622 | -0.06 | N/A | Sites in UTR |
| FAM190B  | NM_018999    | family with sequence similarity 190, member B               | 0 | 0 | 0 | 0 | 2 | 1 | 0 | 1 | hsa-miR-622 | -0.06 | N/A | Sites in UTR |
| NPTX2    | NM_002523    | neuronal pentraxin II                                       | 0 | 0 | 0 | 0 | 1 | 0 | 0 | 1 | hsa-miR-622 | -0.06 | N/A | Sites in UTR |
| USP13    | NM_003940    | ubiquitin specific peptidase 13 (isopeptidase T-3)          | 0 | 0 | 0 | 0 | 1 | 0 | 0 | 1 | hsa-miR-622 | -0.06 | N/A | Sites in UTR |
| RUSC2    | NM_001135999 | RUN and SH3 domain containing 2                             | 0 | 0 | 0 | 0 | 1 | 0 | 0 | 1 | hsa-miR-622 | -0.06 | N/A | Sites in UTR |
| FAM83A   | NM_032899    | family with sequence similarity 83, member A                | 0 | 0 | 0 | 0 | 1 | 0 | 0 | 1 | hsa-miR-622 | -0.06 | N/A | Sites in UTR |
| MTRNR2L4 | NM_001190476 | MT-RNR2-like 4                                              | 0 | 0 | 0 | 0 | 1 | 0 | 0 | 1 | hsa-miR-622 | -0.06 | N/A | Sites in UTR |
| GCNT1    | NM_001097633 | glucosaminyl (N-acetyl) transferase 1, core 2               | 0 | 0 | 0 | 0 | 1 | 0 | 1 | 0 | hsa-miR-622 | -0.06 | N/A | Sites in UTR |
| PLP1     | NM_000533    | proteolipid protein 1                                       | 0 | 0 | 0 | 0 | 1 | 0 | 1 | 0 | hsa-miR-622 | -0.06 | N/A | Sites in UTR |
| SDC3     | NM_014654    | syndecan 3                                                  | 1 | 0 | 1 | 0 | 0 | 0 | 0 | 0 | hsa-miR-622 | -0.06 | N/A | Sites in UTR |
| FLJ45513 | NM_001242791 | hypothetical LOC729220                                      | 0 | 0 | 0 | 0 | 1 | 0 | 1 | 0 | hsa-miR-622 | -0.06 | N/A | Sites in UTR |

|          |              |                                                              |   |   |   |   |   |   |   |   |             |       |     |              |
|----------|--------------|--------------------------------------------------------------|---|---|---|---|---|---|---|---|-------------|-------|-----|--------------|
| SCN4B    | NM_001142348 | sodium channel, voltage-gated, type IV, beta                 | 0 | 0 | 0 | 0 | 2 | 0 | 0 | 2 | hsa-miR-622 | -0.06 | N/A | Sites in UTR |
| SPRR2A   | NM_005988    | small proline-rich protein 2A                                | 0 | 0 | 0 | 0 | 1 | 0 | 0 | 1 | hsa-miR-622 | -0.06 | N/A | Sites in UTR |
| SUSD5    | NM_015551    | sushi domain containing 5                                    | 0 | 0 | 0 | 0 | 1 | 0 | 0 | 1 | hsa-miR-622 | -0.06 | N/A | Sites in UTR |
| MYOZ2    | NM_016599    | myozenin 2                                                   | 0 | 0 | 0 | 0 | 1 | 0 | 0 | 1 | hsa-miR-622 | -0.06 | N/A | Sites in UTR |
| ANKRD40  | NM_052855    | ankyrin repeat domain 40                                     | 0 | 0 | 0 | 0 | 1 | 0 | 0 | 1 | hsa-miR-622 | -0.06 | N/A | Sites in UTR |
| PLEKHA7  | NM_175058    | pleckstrin homology domain containing, family A member 7     | 0 | 0 | 0 | 0 | 1 | 0 | 0 | 1 | hsa-miR-622 | -0.06 | N/A | Sites in UTR |
| ZYG11B   | NM_024646    | zyg-11 homolog B (C. elegans)                                | 1 | 0 | 1 | 0 | 0 | 0 | 0 | 0 | hsa-miR-622 | -0.06 | N/A | Sites in UTR |
| PMAIP1   | NM_021127    | phorbol-12-myristate-13-acetate-induced protein 1            | 0 | 0 | 0 | 0 | 1 | 0 | 0 | 1 | hsa-miR-622 | -0.06 | N/A | Sites in UTR |
| PTPRF    | NM_002840    | protein tyrosine phosphatase, receptor type, F               | 0 | 0 | 0 | 0 | 1 | 0 | 0 | 1 | hsa-miR-622 | -0.06 | N/A | Sites in UTR |
| SORL1    | NM_003105    | sortilin-related receptor, L(DLR class) A repeats containing | 0 | 0 | 0 | 0 | 1 | 0 | 0 | 1 | hsa-miR-622 | -0.06 | N/A | Sites in UTR |
| SNAP29   | NM_004782    | synaptosomal-associated protein, 29kDa                       | 0 | 0 | 0 | 0 | 1 | 0 | 0 | 1 | hsa-miR-622 | -0.06 | N/A | Sites in UTR |
| PLA2G2D  | NM_012400    | phospholipase A2, group IID                                  | 0 | 0 | 0 | 0 | 1 | 0 | 0 | 1 | hsa-miR-622 | -0.06 | N/A | Sites in UTR |
| EXOC2    | NM_018303    | exocyst complex component 2                                  | 0 | 0 | 0 | 0 | 1 | 0 | 0 | 1 | hsa-miR-622 | -0.06 | N/A | Sites in UTR |
| KLHL12   | NM_021633    | kelch-like 12 (Drosophila)                                   | 0 | 0 | 0 | 0 | 1 | 0 | 0 | 1 | hsa-miR-622 | -0.06 | N/A | Sites in UTR |
| TYW5     | NM_001039693 | tRNA-yW synthesizing protein 5                               | 0 | 0 | 0 | 0 | 1 | 0 | 0 | 1 | hsa-miR-622 | -0.06 | N/A | Sites in UTR |
| KIAA0226 | NM_001145642 | KIAA0226                                                     | 1 | 0 | 1 | 0 | 0 | 0 | 0 | 0 | hsa-miR-622 | -0.06 | N/A | Sites in UTR |
| KLHL24   | NM_017644    | kelch-like 24 (Drosophila)                                   | 0 | 0 | 0 | 0 | 1 | 0 | 1 | 0 | hsa-miR-622 | -0.06 | N/A | Sites in UTR |
| ZNF276   | NM_001113525 | zinc finger protein 276                                      | 0 | 0 | 0 | 0 | 1 | 0 | 1 | 0 | hsa-miR-622 | -0.06 | N/A | Sites in UTR |

|         |              |                                                               |   |   |   |   |   |   |   |   |             |       |     |              |
|---------|--------------|---------------------------------------------------------------|---|---|---|---|---|---|---|---|-------------|-------|-----|--------------|
| SNX20   | NM_001144972 | sorting nexin 20                                              | 0 | 0 | 0 | 0 | 1 | 0 | 1 | 0 | hsa-miR-622 | -0.06 | N/A | Sites in UTR |
| TRA2B   | NM_004593    | transformer 2 beta homolog (Drosophila)                       | 0 | 0 | 0 | 0 | 2 | 0 | 0 | 2 | hsa-miR-622 | -0.06 | N/A | Sites in UTR |
| PLEKHM3 | NM_001080475 | pleckstrin homology domain containing, family M, member 3     | 0 | 0 | 0 | 0 | 2 | 1 | 0 | 1 | hsa-miR-622 | -0.06 | N/A | Sites in UTR |
| VCAN    | NM_001126336 | versican                                                      | 0 | 0 | 0 | 0 | 1 | 0 | 0 | 1 | hsa-miR-622 | -0.06 | N/A | Sites in UTR |
| SHC1    | NM_001130040 | SHC (Src homology 2 domain containing) transforming protein 1 | 0 | 0 | 0 | 0 | 1 | 0 | 0 | 1 | hsa-miR-622 | -0.06 | N/A | Sites in UTR |
| HERC2   | NM_004667    | hect domain and RLD 2                                         | 0 | 0 | 0 | 0 | 1 | 0 | 0 | 1 | hsa-miR-622 | -0.06 | N/A | Sites in UTR |
| DTL     | NM_016448    | denticleless homolog (Drosophila)                             | 0 | 0 | 0 | 0 | 1 | 0 | 0 | 1 | hsa-miR-622 | -0.06 | N/A | Sites in UTR |
| TBC1D8B | NM_017752    | TBC1 domain family, member 8B (with GRAM domain)              | 0 | 0 | 0 | 0 | 1 | 0 | 0 | 1 | hsa-miR-622 | -0.06 | N/A | Sites in UTR |
| HMBOX1  | NM_001135726 | homeobox containing 1                                         | 0 | 0 | 0 | 0 | 1 | 0 | 0 | 1 | hsa-miR-622 | -0.06 | N/A | Sites in UTR |
| TRIM52  | NM_032765    | tripartite motif containing 52                                | 0 | 0 | 0 | 0 | 1 | 0 | 0 | 1 | hsa-miR-622 | -0.06 | N/A | Sites in UTR |
| TWISTNB | NM_001002926 | TWIST neighbor                                                | 0 | 0 | 0 | 0 | 1 | 0 | 0 | 1 | hsa-miR-622 | -0.06 | N/A | Sites in UTR |
| ZNF740  | NM_001004304 | zinc finger protein 740                                       | 1 | 0 | 0 | 1 | 0 | 0 | 0 | 0 | hsa-miR-622 | -0.06 | N/A | Sites in UTR |
| CD274   | NM_014143    | CD274 molecule                                                | 0 | 0 | 0 | 0 | 1 | 0 | 1 | 0 | hsa-miR-622 | -0.06 | N/A | Sites in UTR |
| IER5    | NM_016545    | immediate early response 5                                    | 0 | 0 | 0 | 0 | 1 | 0 | 1 | 0 | hsa-miR-622 | -0.06 | N/A | Sites in UTR |
| APLNR   | NM_005161    | apelin receptor                                               | 0 | 0 | 0 | 0 | 1 | 0 | 0 | 1 | hsa-miR-622 | -0.06 | N/A | Sites in UTR |
| BAK1    | NM_001188    | BCL2-antagonist/killer 1                                      | 0 | 0 | 0 | 0 | 1 | 0 | 0 | 1 | hsa-miR-622 | -0.06 | N/A | Sites in UTR |
| HLF     | NM_002126    | hepatic leukemia factor                                       | 0 | 0 | 0 | 0 | 1 | 0 | 0 | 1 | hsa-miR-622 | -0.06 | N/A | Sites in UTR |
| RPS23   | NM_001025    | ribosomal protein S23                                         | 0 | 0 | 0 | 0 | 1 | 0 | 0 | 1 | hsa-miR-622 | -0.06 | N/A | Sites in UTR |

|          |              |                                                                      |   |   |   |   |   |   |   |   |             |       |     |              |
|----------|--------------|----------------------------------------------------------------------|---|---|---|---|---|---|---|---|-------------|-------|-----|--------------|
| SENP1    | NM_014554    | SUMO1/sentrin specific peptidase 1                                   | 0 | 0 | 0 | 0 | 1 | 0 | 0 | 1 | hsa-miR-622 | -0.06 | N/A | Sites in UTR |
| C1orf95  | NM_001003665 | chromosome 1 open reading frame 95                                   | 0 | 0 | 0 | 0 | 1 | 0 | 0 | 1 | hsa-miR-622 | -0.06 | N/A | Sites in UTR |
| SHROOM2  | NM_001649    | shroom family member 2                                               | 0 | 0 | 0 | 0 | 1 | 0 | 1 | 0 | hsa-miR-622 | -0.06 | N/A | Sites in UTR |
| DIAPH1   | NM_001079812 | diaphanous homolog 1 (Drosophila)                                    | 0 | 0 | 0 | 0 | 1 | 0 | 1 | 0 | hsa-miR-622 | -0.06 | N/A | Sites in UTR |
| GSPT1    | NM_001130006 | G1 to S phase transition 1                                           | 0 | 0 | 0 | 0 | 1 | 0 | 1 | 0 | hsa-miR-622 | -0.06 | N/A | Sites in UTR |
| MTMR6    | NM_004685    | myotubularin related protein 6                                       | 0 | 0 | 0 | 0 | 1 | 0 | 1 | 0 | hsa-miR-622 | -0.06 | N/A | Sites in UTR |
| KDM2A    | NM_012308    | lysine (K)-specific demethylase 2A                                   | 0 | 0 | 0 | 0 | 1 | 0 | 1 | 0 | hsa-miR-622 | -0.06 | N/A | Sites in UTR |
| COASY    | NM_001042529 | CoA synthase                                                         | 0 | 0 | 0 | 0 | 1 | 0 | 1 | 0 | hsa-miR-622 | -0.06 | N/A | Sites in UTR |
| CABLES2  | NM_031215    | Cdk5 and Abl enzyme substrate 2                                      | 0 | 0 | 0 | 0 | 2 | 0 | 2 | 0 | hsa-miR-622 | -0.06 | N/A | Sites in UTR |
| SIGLEC1  | NM_023068    | sialic acid binding Ig-like lectin 1, sialoadhesin                   | 0 | 0 | 0 | 0 | 1 | 0 | 0 | 1 | hsa-miR-622 | -0.06 | N/A | Sites in UTR |
| PSME3    | NM_005789    | proteasome (prosome, macropain) activator subunit 3 (PA28 gamma; Ki) | 0 | 0 | 0 | 0 | 1 | 0 | 0 | 1 | hsa-miR-622 | -0.06 | N/A | Sites in UTR |
| SIK2     | NM_015191    | salt-inducible kinase 2                                              | 0 | 0 | 0 | 0 | 1 | 0 | 0 | 1 | hsa-miR-622 | -0.06 | N/A | Sites in UTR |
| CPSF7    | NM_001136040 | cleavage and polyadenylation specific factor 7, 59kDa                | 0 | 0 | 0 | 0 | 1 | 0 | 0 | 1 | hsa-miR-622 | -0.06 | N/A | Sites in UTR |
| FAM192A  | NM_024946    | family with sequence similarity 192, member A                        | 0 | 0 | 0 | 0 | 1 | 0 | 0 | 1 | hsa-miR-622 | -0.06 | N/A | Sites in UTR |
| C9orf170 | NM_001001709 | chromosome 9 open reading frame 170                                  | 0 | 0 | 0 | 0 | 1 | 0 | 0 | 1 | hsa-miR-622 | -0.06 | N/A | Sites in UTR |
| SLC12A4  | NM_001145961 | solute carrier family 12 (potassium/chloride transporters), member 4 | 0 | 0 | 0 | 0 | 1 | 0 | 1 | 0 | hsa-miR-622 | -0.06 | N/A | Sites in UTR |
| KRT75    | NM_004693    | keratin 75                                                           | 0 | 0 | 0 | 0 | 1 | 0 | 1 | 0 | hsa-miR-622 | -0.06 | N/A | Sites in UTR |
| TNPO2    | NM_001136195 | transportin 2                                                        | 0 | 0 | 0 | 0 | 1 | 0 | 1 | 0 | hsa-miR-622 | -0.06 | N/A | Sites in UTR |

|          |              |                                                                                            |   |   |   |   |   |   |   |   |             |       |     |              |
|----------|--------------|--------------------------------------------------------------------------------------------|---|---|---|---|---|---|---|---|-------------|-------|-----|--------------|
| NID1     | NM_002508    | nidogen 1                                                                                  | 0 | 0 | 0 | 0 | 1 | 0 | 0 | 1 | hsa-miR-622 | -0.05 | N/A | Sites in UTR |
| NR2F2    | NM_001145155 | nuclear receptor subfamily 2, group F, member 2                                            | 0 | 0 | 0 | 0 | 1 | 0 | 0 | 1 | hsa-miR-622 | -0.05 | N/A | Sites in UTR |
| WNT6     | NM_006522    | wingless-type MMTV integration site family, member 6                                       | 0 | 0 | 0 | 0 | 1 | 0 | 0 | 1 | hsa-miR-622 | -0.05 | N/A | Sites in UTR |
| ATP13A1  | NM_020410    | ATPase type 13A1                                                                           | 0 | 0 | 0 | 0 | 1 | 0 | 0 | 1 | hsa-miR-622 | -0.05 | N/A | Sites in UTR |
| CASP2    | NM_001224    | caspace 2, apoptosis-related cysteine peptidase                                            | 0 | 0 | 0 | 0 | 1 | 0 | 1 | 0 | hsa-miR-622 | -0.05 | N/A | Sites in UTR |
| DPP4     | NM_001935    | dipeptidyl-peptidase 4                                                                     | 0 | 0 | 0 | 0 | 1 | 0 | 1 | 0 | hsa-miR-622 | -0.05 | N/A | Sites in UTR |
| MYCL1    | NM_005376    | v-myc myelocytomatosis viral oncogene homolog 1, lung carcinoma derived (avian)            | 0 | 0 | 0 | 0 | 1 | 0 | 1 | 0 | hsa-miR-622 | -0.05 | N/A | Sites in UTR |
| SP2      | NM_003110    | Sp2 transcription factor                                                                   | 0 | 0 | 0 | 0 | 1 | 0 | 1 | 0 | hsa-miR-622 | -0.05 | N/A | Sites in UTR |
| C17orf75 | NM_022344    | chromosome 17 open reading frame 75                                                        | 0 | 0 | 0 | 0 | 1 | 0 | 1 | 0 | hsa-miR-622 | -0.05 | N/A | Sites in UTR |
| IFITM10  | NM_001170820 | interferon induced transmembrane protein 10                                                | 0 | 0 | 0 | 0 | 1 | 0 | 1 | 0 | hsa-miR-622 | -0.05 | N/A | Sites in UTR |
| KIF5B    | NM_004521    | kinesin family member 5B                                                                   | 0 | 0 | 0 | 0 | 1 | 0 | 0 | 1 | hsa-miR-622 | -0.05 | N/A | Sites in UTR |
| OXTR     | NM_000916    | oxytocin receptor                                                                          | 0 | 0 | 0 | 0 | 1 | 0 | 0 | 1 | hsa-miR-622 | -0.05 | N/A | Sites in UTR |
| SULT2A1  | NM_003167    | sulfotransferase family, cytosolic, 2A, dehydroepiandrosterone (DHEA)-preferring, member 1 | 0 | 0 | 0 | 0 | 1 | 0 | 0 | 1 | hsa-miR-622 | -0.05 | N/A | Sites in UTR |
| C9orf5   | NM_032012    | chromosome 9 open reading frame 5                                                          | 0 | 0 | 0 | 0 | 1 | 0 | 0 | 1 | hsa-miR-622 | -0.05 | N/A | Sites in UTR |
| ZNF606   | NM_025027    | zinc finger protein 606                                                                    | 0 | 0 | 0 | 0 | 1 | 0 | 0 | 1 | hsa-miR-622 | -0.05 | N/A | Sites in UTR |
| GLYATL3  | NM_001010904 | glycine-N-acyltransferase-like 3                                                           | 0 | 0 | 0 | 0 | 1 | 0 | 0 | 1 | hsa-miR-622 | -0.05 | N/A | Sites in UTR |
| COQ7     | NM_001190983 | coenzyme Q7 homolog, ubiquinone (yeast)                                                    | 0 | 0 | 0 | 0 | 1 | 0 | 1 | 0 | hsa-miR-622 | -0.05 | N/A | Sites in UTR |
| BAZ2A    | NM_013449    | bromodomain adjacent to zinc finger domain, 2A                                             | 0 | 0 | 0 | 0 | 1 | 0 | 1 | 0 | hsa-miR-622 | -0.05 | N/A | Sites in UTR |



|           |              |                                                                                 |   |   |   |   |   |   |   |   |             |       |     |              |
|-----------|--------------|---------------------------------------------------------------------------------|---|---|---|---|---|---|---|---|-------------|-------|-----|--------------|
| ARHGEF18  | NM_001130955 | Rho/Rac guanine nucleotide exchange factor (GEF) 18                             | 0 | 0 | 0 | 0 | 1 | 0 | 1 | 0 | hsa-miR-622 | -0.05 | N/A | Sites in UTR |
| CENPH     | NM_022909    | centromere protein H                                                            | 0 | 0 | 0 | 0 | 1 | 0 | 1 | 0 | hsa-miR-622 | -0.05 | N/A | Sites in UTR |
| UNC5D     | NM_080872    | unc-5 homolog D (C. elegans)                                                    | 0 | 0 | 0 | 0 | 1 | 0 | 1 | 0 | hsa-miR-622 | -0.05 | N/A | Sites in UTR |
| DCLK3     | NM_033403    | doublecortin-like kinase 3                                                      | 0 | 0 | 0 | 0 | 2 | 0 | 0 | 2 | hsa-miR-622 | -0.05 | N/A | Sites in UTR |
| GUCA1B    | NM_002098    | guanylate cyclase activator 1B (retina)                                         | 0 | 0 | 0 | 0 | 1 | 0 | 0 | 1 | hsa-miR-622 | -0.05 | N/A | Sites in UTR |
| RBBP4     | NM_001135255 | retinoblastoma binding protein 4                                                | 0 | 0 | 0 | 0 | 1 | 0 | 0 | 1 | hsa-miR-622 | -0.05 | N/A | Sites in UTR |
| SNTB1     | NM_021021    | syntrophin, beta 1 (dystrophin-associated protein A1, 59kDa, basic component 1) | 0 | 0 | 0 | 0 | 1 | 0 | 0 | 1 | hsa-miR-622 | -0.05 | N/A | Sites in UTR |
| TNFAIP3   | NM_006290    | tumor necrosis factor, alpha-induced protein 3                                  | 0 | 0 | 0 | 0 | 1 | 0 | 0 | 1 | hsa-miR-622 | -0.05 | N/A | Sites in UTR |
| SLC27A4   | NM_005094    | solute carrier family 27 (fatty acid transporter), member 4                     | 1 | 0 | 0 | 1 | 0 | 0 | 0 | 0 | hsa-miR-622 | -0.05 | N/A | Sites in UTR |
| RABGAP1   | NM_012197    | RAB GTPase activating protein 1                                                 | 0 | 0 | 0 | 0 | 1 | 0 | 0 | 1 | hsa-miR-622 | -0.05 | N/A | Sites in UTR |
| PIGR      | NM_002644    | polymeric immunoglobulin receptor                                               | 0 | 0 | 0 | 0 | 1 | 0 | 1 | 0 | hsa-miR-622 | -0.05 | N/A | Sites in UTR |
| PKP2      | NM_001005242 | plakophilin 2                                                                   | 0 | 0 | 0 | 0 | 1 | 0 | 1 | 0 | hsa-miR-622 | -0.05 | N/A | Sites in UTR |
| CTSA      | NM_000308    | cathepsin A                                                                     | 0 | 0 | 0 | 0 | 1 | 0 | 1 | 0 | hsa-miR-622 | -0.05 | N/A | Sites in UTR |
| CORO2A    | NM_003389    | coronin, actin binding protein, 2A                                              | 0 | 0 | 0 | 0 | 1 | 0 | 1 | 0 | hsa-miR-622 | -0.05 | N/A | Sites in UTR |
| C14orf126 | NM_080664    | chromosome 14 open reading frame 126                                            | 0 | 0 | 0 | 0 | 1 | 0 | 1 | 0 | hsa-miR-622 | -0.05 | N/A | Sites in UTR |
| FGD4      | NM_139241    | FYVE, RhoGEF and PH domain containing 4                                         | 0 | 0 | 0 | 0 | 1 | 0 | 1 | 0 | hsa-miR-622 | -0.05 | N/A | Sites in UTR |
| SLC9A9    | NM_173653    | solute carrier family 9 (sodium/hydrogen exchanger), member 9                   | 0 | 0 | 0 | 0 | 1 | 0 | 1 | 0 | hsa-miR-622 | -0.05 | N/A | Sites in UTR |
| GAS8      | NM_001481    | growth arrest-specific 8                                                        | 0 | 0 | 0 | 0 | 1 | 1 | 0 | 0 | hsa-miR-622 | -0.05 | N/A | Sites in UTR |

|          |              |                                                   |   |   |   |   |   |   |   |   |             |       |     |              |
|----------|--------------|---------------------------------------------------|---|---|---|---|---|---|---|---|-------------|-------|-----|--------------|
| CDHR1    | NM_033100    | cadherin-related family member 1                  | 0 | 0 | 0 | 0 | 1 | 1 | 0 | 0 | hsa-miR-622 | -0.05 | N/A | Sites in UTR |
| KIAA0895 | NM_001100425 | KIAA0895                                          | 0 | 0 | 0 | 0 | 2 | 0 | 1 | 1 | hsa-miR-622 | -0.05 | N/A | Sites in UTR |
| FSTL4    | NM_015082    | folliculin-like 4                                 | 0 | 0 | 0 | 0 | 2 | 0 | 2 | 0 | hsa-miR-622 | -0.05 | N/A | Sites in UTR |
| RBFOX2   | NM_001031695 | RNA binding protein, fox-1 homolog (C. elegans) 2 | 0 | 0 | 0 | 0 | 2 | 0 | 2 | 0 | hsa-miR-622 | -0.05 | N/A | Sites in UTR |
| RASL10B  | NM_033315    | RAS-like, family 10, member B                     | 0 | 0 | 0 | 0 | 2 | 0 | 2 | 0 | hsa-miR-622 | -0.05 | N/A | Sites in UTR |
| TJP1     | NM_003257    | tight junction protein 1 (zona occludens 1)       | 0 | 0 | 0 | 0 | 1 | 0 | 0 | 1 | hsa-miR-622 | -0.05 | N/A | Sites in UTR |
| ENC1     | NM_003633    | ectodermal-neural cortex 1 (with BTB-like domain) | 0 | 0 | 0 | 0 | 1 | 0 | 0 | 1 | hsa-miR-622 | -0.05 | N/A | Sites in UTR |
| ANGPTL7  | NM_021146    | angiopoietin-like 7                               | 0 | 0 | 0 | 0 | 1 | 0 | 0 | 1 | hsa-miR-622 | -0.05 | N/A | Sites in UTR |
| ZHX1     | NM_001017926 | zinc fingers and homeoboxes 1                     | 0 | 0 | 0 | 0 | 1 | 0 | 0 | 1 | hsa-miR-622 | -0.05 | N/A | Sites in UTR |
| SMOC1    | NM_001034852 | SPARC related modular calcium binding 1           | 0 | 0 | 0 | 0 | 1 | 0 | 0 | 1 | hsa-miR-622 | -0.05 | N/A | Sites in UTR |
| NKAIN2   | NM_001040214 | Na+/K+ transporting ATPase interacting 2          | 0 | 0 | 0 | 0 | 1 | 0 | 0 | 1 | hsa-miR-622 | -0.05 | N/A | Sites in UTR |
| MSL1     | NM_001012241 | male-specific lethal 1 homolog (Drosophila)       | 0 | 0 | 0 | 0 | 1 | 0 | 0 | 1 | hsa-miR-622 | -0.05 | N/A | Sites in UTR |
| C5orf56  | NM_001207003 | chromosome 5 open reading frame 56                | 0 | 0 | 0 | 0 | 1 | 0 | 0 | 1 | hsa-miR-622 | -0.05 | N/A | Sites in UTR |
| HSPG2    | NM_005529    | heparan sulfate proteoglycan 2                    | 0 | 0 | 0 | 0 | 1 | 0 | 1 | 0 | hsa-miR-622 | -0.05 | N/A | Sites in UTR |
| JRK      | NM_001077527 | jerky homolog (mouse)                             | 0 | 0 | 0 | 0 | 1 | 0 | 1 | 0 | hsa-miR-622 | -0.05 | N/A | Sites in UTR |
| NCAPH2   | NM_001185011 | non-SMC condensin II complex, subunit H2          | 0 | 0 | 0 | 0 | 1 | 0 | 1 | 0 | hsa-miR-622 | -0.05 | N/A | Sites in UTR |
| C5orf51  | NM_175921    | chromosome 5 open reading frame 51                | 0 | 0 | 0 | 0 | 1 | 1 | 0 | 0 | hsa-miR-622 | -0.05 | N/A | Sites in UTR |
| GPR56    | NM_001145770 | G protein-coupled receptor 56                     | 0 | 0 | 0 | 0 | 1 | 0 | 0 | 1 | hsa-miR-622 | -0.05 | N/A | Sites in UTR |

|             |              |                                                           |   |   |   |   |   |   |   |   |             |       |     |              |
|-------------|--------------|-----------------------------------------------------------|---|---|---|---|---|---|---|---|-------------|-------|-----|--------------|
| ZMYND11     | NM_001202464 | zinc finger, MYND-type containing 11                      | 0 | 0 | 0 | 0 | 1 | 0 | 0 | 1 | hsa-miR-622 | -0.05 | N/A | Sites in UTR |
| RIOK2       | NM_001159749 | RIO kinase 2 (yeast)                                      | 0 | 0 | 0 | 0 | 2 | 0 | 0 | 2 | hsa-miR-622 | -0.05 | N/A | Sites in UTR |
| ZNF304      | NM_020657    | zinc finger protein 304                                   | 0 | 0 | 0 | 0 | 1 | 0 | 0 | 1 | hsa-miR-622 | -0.05 | N/A | Sites in UTR |
| SHROOM3     | NM_020859    | shroom family member 3                                    | 0 | 0 | 0 | 0 | 1 | 0 | 0 | 1 | hsa-miR-622 | -0.05 | N/A | Sites in UTR |
| RHOU        | NM_021205    | ras homolog gene family, member U                         | 0 | 0 | 0 | 0 | 1 | 0 | 0 | 1 | hsa-miR-622 | -0.05 | N/A | Sites in UTR |
| C19orf18    | NM_152474    | chromosome 19 open reading frame 18                       | 0 | 0 | 0 | 0 | 1 | 0 | 0 | 1 | hsa-miR-622 | -0.05 | N/A | Sites in UTR |
| ADAR        | NM_001025107 | adenosine deaminase, RNA-specific                         | 0 | 0 | 0 | 0 | 1 | 0 | 1 | 0 | hsa-miR-622 | -0.05 | N/A | Sites in UTR |
| CSNK1G2     | NM_001319    | casein kinase 1, gamma 2                                  | 0 | 0 | 0 | 0 | 1 | 0 | 1 | 0 | hsa-miR-622 | -0.05 | N/A | Sites in UTR |
| FNTB        | NM_002028    | farnesyltransferase, CAAX box, beta                       | 0 | 0 | 0 | 0 | 1 | 0 | 1 | 0 | hsa-miR-622 | -0.05 | N/A | Sites in UTR |
| ZNF208      | NM_007153    | zinc finger protein 208                                   | 0 | 0 | 0 | 0 | 1 | 0 | 1 | 0 | hsa-miR-622 | -0.05 | N/A | Sites in UTR |
| CHMP4C      | NM_152284    | chromatin modifying protein 4C                            | 0 | 0 | 0 | 0 | 1 | 0 | 1 | 0 | hsa-miR-622 | -0.05 | N/A | Sites in UTR |
| PACRGL      | NM_001130727 | PARK2 co-regulated-like                                   | 0 | 0 | 0 | 0 | 1 | 0 | 1 | 0 | hsa-miR-622 | -0.05 | N/A | Sites in UTR |
| CHURC1-FNTB | NM_001202558 | CHURC1-FNTB readthrough                                   | 0 | 0 | 0 | 0 | 1 | 0 | 1 | 0 | hsa-miR-622 | -0.05 | N/A | Sites in UTR |
| ATOH8       | NM_032827    | atonal homolog 8 (Drosophila)                             | 0 | 0 | 0 | 0 | 2 | 0 | 2 | 0 | hsa-miR-622 | -0.05 | N/A | Sites in UTR |
| CDKN2B      | NM_004936    | cyclin-dependent kinase inhibitor 2B (p15, inhibits CDK4) | 0 | 0 | 0 | 0 | 1 | 0 | 0 | 1 | hsa-miR-622 | -0.05 | N/A | Sites in UTR |
| CDK17       | NM_001170464 | cyclin-dependent kinase 17                                | 0 | 0 | 0 | 0 | 1 | 0 | 0 | 1 | hsa-miR-622 | -0.05 | N/A | Sites in UTR |
| TMEM63C     | NM_020431    | transmembrane protein 63C                                 | 0 | 0 | 0 | 0 | 1 | 0 | 0 | 1 | hsa-miR-622 | -0.05 | N/A | Sites in UTR |
| IGSF11      | NM_001015887 | immunoglobulin superfamily, member 11                     | 0 | 0 | 0 | 0 | 1 | 0 | 0 | 1 | hsa-miR-622 | -0.05 | N/A | Sites in UTR |

|         |              |                                                                                    |   |   |   |   |   |   |   |   |             |       |     |              |
|---------|--------------|------------------------------------------------------------------------------------|---|---|---|---|---|---|---|---|-------------|-------|-----|--------------|
| RTKN2   | NM_145307    | rhotekin 2                                                                         | 0 | 0 | 0 | 0 | 1 | 0 | 0 | 1 | hsa-miR-622 | -0.05 | N/A | Sites in UTR |
| RIN1    | NM_004292    | Ras and Rab interactor 1                                                           | 0 | 0 | 0 | 0 | 1 | 0 | 1 | 0 | hsa-miR-622 | -0.05 | N/A | Sites in UTR |
| ANGPTL4 | NM_001039667 | angiotensin-like 4                                                                 | 0 | 0 | 0 | 0 | 1 | 0 | 1 | 0 | hsa-miR-622 | -0.05 | N/A | Sites in UTR |
| BRWD1   | NM_001007246 | bromodomain and WD repeat domain containing 1                                      | 0 | 0 | 0 | 0 | 1 | 0 | 1 | 0 | hsa-miR-622 | -0.05 | N/A | Sites in UTR |
| COL6A6  | NM_001102608 | collagen, type VI, alpha 6                                                         | 0 | 0 | 0 | 0 | 1 | 0 | 1 | 0 | hsa-miR-622 | -0.05 | N/A | Sites in UTR |
| FBXL16  | NM_153350    | F-box and leucine-rich repeat protein 16                                           | 0 | 0 | 0 | 0 | 1 | 0 | 1 | 0 | hsa-miR-622 | -0.05 | N/A | Sites in UTR |
| CES4A   | NM_001190201 | carboxylesterase 4A                                                                | 0 | 0 | 0 | 0 | 1 | 0 | 1 | 0 | hsa-miR-622 | -0.05 | N/A | Sites in UTR |
| RER1    | NM_007033    | RER1 retention in endoplasmic reticulum 1 homolog (S. cerevisiae)                  | 0 | 0 | 0 | 0 | 2 | 0 | 2 | 0 | hsa-miR-622 | -0.05 | N/A | Sites in UTR |
| SLC31A2 | NM_001860    | solute carrier family 31 (copper transporters), member 2                           | 0 | 0 | 0 | 0 | 1 | 0 | 0 | 1 | hsa-miR-622 | -0.05 | N/A | Sites in UTR |
| IFIT2   | NM_001547    | interferon-induced protein with tetratricopeptide repeats 2                        | 0 | 0 | 0 | 0 | 1 | 0 | 0 | 1 | hsa-miR-622 | -0.05 | N/A | Sites in UTR |
| KCNJ13  | NM_001172416 | potassium inwardly-rectifying channel, subfamily J, member 13                      | 0 | 0 | 0 | 0 | 1 | 0 | 0 | 1 | hsa-miR-622 | -0.05 | N/A | Sites in UTR |
| PIPOX   | NM_016518    | pipecolic acid oxidase                                                             | 0 | 0 | 0 | 0 | 1 | 0 | 0 | 1 | hsa-miR-622 | -0.05 | N/A | Sites in UTR |
| SYVN1   | NM_032431    | synovial apoptosis inhibitor 1, synoviolin                                         | 0 | 0 | 0 | 0 | 1 | 0 | 0 | 1 | hsa-miR-622 | -0.05 | N/A | Sites in UTR |
| TCEANC2 | NM_153035    | transcription elongation factor A (SII) N-terminal and central domain containing 2 | 0 | 0 | 0 | 0 | 1 | 0 | 0 | 1 | hsa-miR-622 | -0.05 | N/A | Sites in UTR |
| CBLN3   | NM_001039771 | cerebellin 3 precursor                                                             | 0 | 0 | 0 | 0 | 1 | 0 | 0 | 1 | hsa-miR-622 | -0.05 | N/A | Sites in UTR |
| UHRF1   | NM_001048201 | ubiquitin-like with PHD and ring finger domains 1                                  | 0 | 0 | 0 | 0 | 1 | 0 | 1 | 0 | hsa-miR-622 | -0.05 | N/A | Sites in UTR |
| AJAP1   | NM_001042478 | adherens junctions associated protein 1                                            | 0 | 0 | 0 | 0 | 1 | 0 | 1 | 0 | hsa-miR-622 | -0.05 | N/A | Sites in UTR |
| PIK3CD  | NM_005026    | phosphoinositide-3-kinase, catalytic, delta polypeptide                            | 0 | 0 | 0 | 0 | 2 | 0 | 1 | 1 | hsa-miR-622 | -0.05 | N/A | Sites in UTR |

|          |              |                                                                                   |   |   |   |   |   |   |   |   |             |       |     |              |
|----------|--------------|-----------------------------------------------------------------------------------|---|---|---|---|---|---|---|---|-------------|-------|-----|--------------|
| ARAF     | NM_001654    | v-raf murine sarcoma 3611 viral oncogene homolog                                  | 0 | 0 | 0 | 0 | 1 | 0 | 0 | 1 | hsa-miR-622 | -0.05 | N/A | Sites in UTR |
| DLST     | NM_001933    | dihydroliipoamide S-succinyltransferase (E2 component of 2-oxo-glutarate complex) | 0 | 0 | 0 | 0 | 1 | 0 | 0 | 1 | hsa-miR-622 | -0.05 | N/A | Sites in UTR |
| FCGR1A   | NM_000566    | Fc fragment of IgG, high affinity Ia, receptor (CD64)                             | 0 | 0 | 0 | 0 | 1 | 0 | 0 | 1 | hsa-miR-622 | -0.05 | N/A | Sites in UTR |
| PTPN2    | NM_002828    | protein tyrosine phosphatase, non-receptor type 2                                 | 0 | 0 | 0 | 0 | 1 | 0 | 0 | 1 | hsa-miR-622 | -0.05 | N/A | Sites in UTR |
| SFTPB    | NM_000542    | surfactant protein B                                                              | 0 | 0 | 0 | 0 | 1 | 0 | 0 | 1 | hsa-miR-622 | -0.05 | N/A | Sites in UTR |
| F2RL3    | NM_003950    | coagulation factor II (thrombin) receptor-like 3                                  | 0 | 0 | 0 | 0 | 1 | 0 | 0 | 1 | hsa-miR-622 | -0.05 | N/A | Sites in UTR |
| CPEB4    | NM_030627    | cytoplasmic polyadenylation element binding protein 4                             | 0 | 0 | 0 | 0 | 1 | 0 | 0 | 1 | hsa-miR-622 | -0.05 | N/A | Sites in UTR |
| KNCN     | NM_001097611 | kinocilin                                                                         | 0 | 0 | 0 | 0 | 1 | 0 | 0 | 1 | hsa-miR-622 | -0.05 | N/A | Sites in UTR |
| KCTD7    | NM_001167961 | potassium channel tetramerisation domain containing 7                             | 0 | 0 | 0 | 0 | 1 | 0 | 0 | 1 | hsa-miR-622 | -0.05 | N/A | Sites in UTR |
| C16orf52 | NM_001164579 | chromosome 16 open reading frame 52                                               | 0 | 0 | 0 | 0 | 1 | 0 | 0 | 1 | hsa-miR-622 | -0.05 | N/A | Sites in UTR |
| SYNGR1   | NM_004711    | synaptogyrin 1                                                                    | 0 | 0 | 0 | 0 | 1 | 0 | 1 | 0 | hsa-miR-622 | -0.05 | N/A | Sites in UTR |
| FBXW8    | NM_012174    | F-box and WD repeat domain containing 8                                           | 0 | 0 | 0 | 0 | 1 | 0 | 1 | 0 | hsa-miR-622 | -0.05 | N/A | Sites in UTR |
| SNX15    | NM_013306    | sorting nexin 15                                                                  | 0 | 0 | 0 | 0 | 1 | 0 | 1 | 0 | hsa-miR-622 | -0.05 | N/A | Sites in UTR |
| IL34     | NM_001172771 | interleukin 34                                                                    | 0 | 0 | 0 | 0 | 1 | 0 | 1 | 0 | hsa-miR-622 | -0.05 | N/A | Sites in UTR |
| C17orf28 | NM_030630    | chromosome 17 open reading frame 28                                               | 0 | 0 | 0 | 0 | 1 | 0 | 1 | 0 | hsa-miR-622 | -0.05 | N/A | Sites in UTR |
| IRF2BP2  | NM_001077397 | interferon regulatory factor 2 binding protein 2                                  | 1 | 0 | 1 | 0 | 0 | 0 | 0 | 0 | hsa-miR-622 | -0.05 | N/A | Sites in UTR |
| DMPK     | NM_001081560 | dystrophia myotonica-protein kinase                                               | 0 | 0 | 0 | 0 | 1 | 0 | 0 | 1 | hsa-miR-622 | -0.05 | N/A | Sites in UTR |
| STAC     | NM_003149    | SH3 and cysteine rich domain                                                      | 0 | 0 | 0 | 0 | 1 | 0 | 0 | 1 | hsa-miR-622 | -0.05 | N/A | Sites in UTR |

|         |              |                                                                                        |   |   |   |   |   |   |   |   |             |       |     |              |
|---------|--------------|----------------------------------------------------------------------------------------|---|---|---|---|---|---|---|---|-------------|-------|-----|--------------|
| WVVOX   | NM_016373    | WW domain containing oxidoreductase                                                    | 0 | 0 | 0 | 0 | 1 | 0 | 0 | 1 | hsa-miR-622 | -0.05 | N/A | Sites in UTR |
| ESRP1   | NM_001034915 | epithelial splicing regulatory protein 1                                               | 0 | 0 | 0 | 0 | 1 | 0 | 0 | 1 | hsa-miR-622 | -0.05 | N/A | Sites in UTR |
| ZNF528  | NM_032423    | zinc finger protein 528                                                                | 0 | 0 | 0 | 0 | 1 | 0 | 0 | 1 | hsa-miR-622 | -0.05 | N/A | Sites in UTR |
| DCAF10  | NM_024345    | DDB1 and CUL4 associated factor 10                                                     | 0 | 0 | 0 | 0 | 1 | 0 | 1 | 0 | hsa-miR-622 | -0.05 | N/A | Sites in UTR |
| HSD3B7  | NM_001142777 | hydroxy-delta-5-steroid dehydrogenase, 3 beta- and steroid delta-isomerase 7           | 0 | 0 | 0 | 0 | 1 | 0 | 1 | 0 | hsa-miR-622 | -0.05 | N/A | Sites in UTR |
| GAL3ST3 | NM_033036    | galactose-3-O-sulfotransferase 3                                                       | 0 | 0 | 0 | 0 | 1 | 0 | 1 | 0 | hsa-miR-622 | -0.05 | N/A | Sites in UTR |
| MYOZ3   | NM_001122853 | myozenin 3                                                                             | 0 | 0 | 0 | 0 | 1 | 0 | 1 | 0 | hsa-miR-622 | -0.05 | N/A | Sites in UTR |
| C8orf73 | NM_001100878 | chromosome 8 open reading frame 73                                                     | 0 | 0 | 0 | 0 | 1 | 0 | 1 | 0 | hsa-miR-622 | -0.05 | N/A | Sites in UTR |
| DNAJC30 | NM_032317    | Dnaj (Hsp40) homolog, subfamily C, member 30                                           | 0 | 0 | 0 | 0 | 1 | 1 | 0 | 0 | hsa-miR-622 | -0.05 | N/A | Sites in UTR |
| TP53RK  | NM_033550    | TP53 regulating kinase                                                                 | 0 | 0 | 0 | 0 | 1 | 0 | 0 | 1 | hsa-miR-622 | -0.04 | N/A | Sites in UTR |
| ARNT    | NM_001197325 | aryl hydrocarbon receptor nuclear translocator                                         | 0 | 0 | 0 | 0 | 1 | 0 | 0 | 1 | hsa-miR-622 | -0.04 | N/A | Sites in UTR |
| CAMKK2  | NM_006549    | calcium/calmodulin-dependent protein kinase kinase 2, beta                             | 0 | 0 | 0 | 0 | 1 | 0 | 0 | 1 | hsa-miR-622 | -0.04 | N/A | Sites in UTR |
| RBBP9   | NM_006606    | retinoblastoma binding protein 9                                                       | 0 | 0 | 0 | 0 | 1 | 0 | 0 | 1 | hsa-miR-622 | -0.04 | N/A | Sites in UTR |
| DTWD1   | NM_001144955 | DTW domain containing 1                                                                | 0 | 0 | 0 | 0 | 1 | 0 | 0 | 1 | hsa-miR-622 | -0.04 | N/A | Sites in UTR |
| JHDM1D  | NM_030647    | jumonji C domain containing histone demethylase 1 homolog D (S. cerevisiae)            | 1 | 0 | 0 | 1 | 0 | 0 | 0 | 0 | hsa-miR-622 | -0.04 | N/A | Sites in UTR |
| EDN2    | NM_001956    | endothelin 2                                                                           | 0 | 0 | 0 | 0 | 1 | 0 | 1 | 0 | hsa-miR-622 | -0.04 | N/A | Sites in UTR |
| FAM115A | NM_001206938 | family with sequence similarity 115, member A                                          | 0 | 0 | 0 | 0 | 2 | 0 | 1 | 1 | hsa-miR-622 | -0.04 | N/A | Sites in UTR |
| SEMA3G  | NM_020163    | sema domain, immunoglobulin domain (Ig), short basic domain, secreted, (semaphorin) 3G | 0 | 0 | 0 | 0 | 1 | 0 | 1 | 0 | hsa-miR-622 | -0.04 | N/A | Sites in UTR |

|           |              |                                                                            |   |   |   |   |   |   |   |   |             |       |     |              |
|-----------|--------------|----------------------------------------------------------------------------|---|---|---|---|---|---|---|---|-------------|-------|-----|--------------|
| ZNF776    | NM_173632    | zinc finger protein 776                                                    | 0 | 0 | 0 | 0 | 1 | 0 | 1 | 0 | hsa-miR-622 | -0.04 | N/A | Sites in UTR |
| ATXN1L    | NM_001137675 | ataxin 1-like                                                              | 0 | 0 | 0 | 0 | 1 | 0 | 1 | 0 | hsa-miR-622 | -0.04 | N/A | Sites in UTR |
| USP31     | NM_020718    | ubiquitin specific peptidase 31                                            | 0 | 0 | 0 | 0 | 1 | 1 | 0 | 0 | hsa-miR-622 | -0.04 | N/A | Sites in UTR |
| HNRNPA2B1 | NM_002137    | heterogeneous nuclear ribonucleoprotein A2/B1                              | 0 | 0 | 0 | 0 | 1 | 0 | 0 | 1 | hsa-miR-622 | -0.04 | N/A | Sites in UTR |
| KIF3B     | NM_004798    | kinesin family member 3B                                                   | 0 | 0 | 0 | 0 | 1 | 0 | 0 | 1 | hsa-miR-622 | -0.04 | N/A | Sites in UTR |
| YLP1      | NM_019589    | YLP motif containing 1                                                     | 0 | 0 | 0 | 0 | 1 | 0 | 0 | 1 | hsa-miR-622 | -0.04 | N/A | Sites in UTR |
| BLK       | NM_001715    | B lymphoid tyrosine kinase                                                 | 0 | 0 | 0 | 0 | 1 | 0 | 1 | 0 | hsa-miR-622 | -0.04 | N/A | Sites in UTR |
| LRP3      | NM_002333    | low density lipoprotein receptor-related protein 3                         | 0 | 0 | 0 | 0 | 1 | 0 | 1 | 0 | hsa-miR-622 | -0.04 | N/A | Sites in UTR |
| PPP2R1B   | NM_001177562 | protein phosphatase 2, regulatory subunit A, beta                          | 0 | 0 | 0 | 0 | 1 | 0 | 1 | 0 | hsa-miR-622 | -0.04 | N/A | Sites in UTR |
| SLC6A8    | NM_001142805 | solute carrier family 6 (neurotransmitter transporter, creatine), member 8 | 0 | 0 | 0 | 0 | 1 | 0 | 1 | 0 | hsa-miR-622 | -0.04 | N/A | Sites in UTR |
| EEF2K     | NM_013302    | eukaryotic elongation factor-2 kinase                                      | 0 | 0 | 0 | 0 | 1 | 0 | 1 | 0 | hsa-miR-622 | -0.04 | N/A | Sites in UTR |
| FKBP10    | NM_021939    | FK506 binding protein 10, 65 kDa                                           | 0 | 0 | 0 | 0 | 1 | 0 | 1 | 0 | hsa-miR-622 | -0.04 | N/A | Sites in UTR |
| ZNF483    | NM_133464    | zinc finger protein 483                                                    | 0 | 0 | 0 | 0 | 1 | 0 | 1 | 0 | hsa-miR-622 | -0.04 | N/A | Sites in UTR |
| GSG1L     | NM_001109763 | GSG1-like                                                                  | 0 | 0 | 0 | 0 | 2 | 0 | 1 | 1 | hsa-miR-622 | -0.04 | N/A | Sites in UTR |
| RBM14     | NM_001198836 | RNA binding motif protein 14                                               | 0 | 0 | 0 | 0 | 1 | 0 | 0 | 1 | hsa-miR-622 | -0.04 | N/A | Sites in UTR |
| SF3A3     | NM_006802    | splicing factor 3a, subunit 3, 60kDa                                       | 0 | 0 | 0 | 0 | 1 | 0 | 0 | 1 | hsa-miR-622 | -0.04 | N/A | Sites in UTR |
| SF3B3     | NM_012426    | splicing factor 3b, subunit 3, 130kDa                                      | 0 | 0 | 0 | 0 | 1 | 0 | 0 | 1 | hsa-miR-622 | -0.04 | N/A | Sites in UTR |
| SEZ6L     | NM_001184773 | seizure related 6 homolog (mouse)-like                                     | 1 | 0 | 0 | 1 | 0 | 0 | 0 | 0 | hsa-miR-622 | -0.04 | N/A | Sites in UTR |

|          |              |                                                             |   |   |   |   |   |   |   |   |             |       |     |              |
|----------|--------------|-------------------------------------------------------------|---|---|---|---|---|---|---|---|-------------|-------|-----|--------------|
| ZBTB4    | NM_001128833 | zinc finger and BTB domain containing 4                     | 0 | 0 | 0 | 0 | 1 | 0 | 0 | 1 | hsa-miR-622 | -0.04 | N/A | Sites in UTR |
| THSD4    | NM_024817    | thrombospondin, type I, domain containing 4                 | 0 | 0 | 0 | 0 | 1 | 0 | 0 | 1 | hsa-miR-622 | -0.04 | N/A | Sites in UTR |
| CACNA2D4 | NM_172364    | calcium channel, voltage-dependent, alpha 2/delta subunit 4 | 0 | 0 | 0 | 0 | 1 | 0 | 0 | 1 | hsa-miR-622 | -0.04 | N/A | Sites in UTR |
| ORC4     | NM_001190879 | origin recognition complex, subunit 4                       | 0 | 0 | 0 | 0 | 1 | 0 | 1 | 0 | hsa-miR-622 | -0.04 | N/A | Sites in UTR |
| RAB5B    | NM_002868    | RAB5B, member RAS oncogene family                           | 0 | 0 | 0 | 0 | 1 | 0 | 1 | 0 | hsa-miR-622 | -0.04 | N/A | Sites in UTR |
| SH3BP5L  | NM_030645    | SH3-binding domain protein 5-like                           | 0 | 0 | 0 | 0 | 1 | 0 | 1 | 0 | hsa-miR-622 | -0.04 | N/A | Sites in UTR |
| SLC38A5  | NM_033518    | solute carrier family 38, member 5                          | 0 | 0 | 0 | 0 | 1 | 0 | 1 | 0 | hsa-miR-622 | -0.04 | N/A | Sites in UTR |
| CYP4F22  | NM_173483    | cytochrome P450, family 4, subfamily F, polypeptide 22      | 0 | 0 | 0 | 0 | 1 | 0 | 1 | 0 | hsa-miR-622 | -0.04 | N/A | Sites in UTR |
| DCBLD2   | NM_080927    | discoidin, CUB and LCCL domain containing 2                 | 0 | 0 | 0 | 0 | 1 | 0 | 1 | 0 | hsa-miR-622 | -0.04 | N/A | Sites in UTR |
| FAM116B  | NM_001001794 | family with sequence similarity 116, member B               | 0 | 0 | 0 | 0 | 1 | 0 | 1 | 0 | hsa-miR-622 | -0.04 | N/A | Sites in UTR |
| MAPT     | NM_001123066 | microtubule-associated protein tau                          | 0 | 0 | 0 | 0 | 2 | 0 | 1 | 1 | hsa-miR-622 | -0.04 | N/A | Sites in UTR |
| TNFSF14  | NM_003807    | tumor necrosis factor (ligand) superfamily, member 14       | 0 | 0 | 0 | 0 | 2 | 0 | 1 | 1 | hsa-miR-622 | -0.04 | N/A | Sites in UTR |
| CDC42BPB | NM_006035    | CDC42 binding protein kinase beta (DMPK-like)               | 1 | 0 | 0 | 1 | 0 | 0 | 0 | 0 | hsa-miR-622 | -0.04 | N/A | Sites in UTR |
| PALLD    | NM_001166108 | palladin, cytoskeletal associated protein                   | 0 | 0 | 0 | 0 | 1 | 0 | 0 | 1 | hsa-miR-622 | -0.04 | N/A | Sites in UTR |
| KIAA1467 | NM_020853    | KIAA1467                                                    | 0 | 0 | 0 | 0 | 1 | 0 | 0 | 1 | hsa-miR-622 | -0.04 | N/A | Sites in UTR |
| MTPN     | NM_145808    | myotrophin                                                  | 0 | 0 | 0 | 0 | 1 | 0 | 0 | 1 | hsa-miR-622 | -0.04 | N/A | Sites in UTR |
| ETF1     | NM_004730    | eukaryotic translation termination factor 1                 | 0 | 0 | 0 | 0 | 1 | 0 | 1 | 0 | hsa-miR-622 | -0.04 | N/A | Sites in UTR |
| MYO1E    | NM_004998    | myosin IE                                                   | 0 | 0 | 0 | 0 | 1 | 0 | 1 | 0 | hsa-miR-622 | -0.04 | N/A | Sites in UTR |



|           |              |                                                               |   |   |   |   |   |   |   |   |             |       |     |              |
|-----------|--------------|---------------------------------------------------------------|---|---|---|---|---|---|---|---|-------------|-------|-----|--------------|
| TOB2      | NM_016272    | transducer of ERBB2, 2                                        | 0 | 0 | 0 | 0 | 1 | 0 | 1 | 0 | hsa-miR-622 | -0.04 | N/A | Sites in UTR |
| MIER2     | NM_017550    | mesoderm induction early response 1, family member 2          | 0 | 0 | 0 | 0 | 1 | 0 | 1 | 0 | hsa-miR-622 | -0.04 | N/A | Sites in UTR |
| UBAC2     | NM_001144072 | UBA domain containing 2                                       | 0 | 0 | 0 | 0 | 1 | 0 | 1 | 0 | hsa-miR-622 | -0.04 | N/A | Sites in UTR |
| RBM41     | NM_001171080 | RNA binding motif protein 41                                  | 0 | 0 | 0 | 0 | 2 | 0 | 0 | 2 | hsa-miR-622 | -0.04 | N/A | Sites in UTR |
| DCP2      | NM_001242377 | DCP2 decapping enzyme homolog (S. cerevisiae)                 | 0 | 0 | 0 | 0 | 2 | 0 | 1 | 1 | hsa-miR-622 | -0.04 | N/A | Sites in UTR |
| CACNB2    | NM_000724    | calcium channel, voltage-dependent, beta 2 subunit            | 0 | 0 | 0 | 0 | 1 | 0 | 0 | 1 | hsa-miR-622 | -0.04 | N/A | Sites in UTR |
| MDFIC     | NM_001166345 | MyoD family inhibitor domain containing                       | 0 | 0 | 0 | 0 | 1 | 0 | 1 | 0 | hsa-miR-622 | -0.04 | N/A | Sites in UTR |
| NAV2      | NM_001111018 | neuron navigator 2                                            | 0 | 0 | 0 | 0 | 1 | 0 | 1 | 0 | hsa-miR-622 | -0.04 | N/A | Sites in UTR |
| MOBK1A    | NM_173468    | MOB1, Mps One Binder kinase activator-like 1A (yeast)         | 1 | 1 | 0 | 0 | 0 | 0 | 0 | 0 | hsa-miR-622 | -0.04 | N/A | Sites in UTR |
| GPI       | NM_000175    | glucose-6-phosphate isomerase                                 | 0 | 0 | 0 | 0 | 2 | 0 | 2 | 0 | hsa-miR-622 | -0.04 | N/A | Sites in UTR |
| ITGB1BP1  | NM_004763    | integrin beta 1 binding protein 1                             | 0 | 0 | 0 | 0 | 1 | 0 | 0 | 1 | hsa-miR-622 | -0.04 | N/A | Sites in UTR |
| TBC1D30   | NM_015279    | TBC1 domain family, member 30                                 | 0 | 0 | 0 | 0 | 1 | 0 | 0 | 1 | hsa-miR-622 | -0.04 | N/A | Sites in UTR |
| SFRP5     | NM_003015    | secreted frizzled-related protein 5                           | 0 | 0 | 0 | 0 | 1 | 0 | 1 | 0 | hsa-miR-622 | -0.04 | N/A | Sites in UTR |
| DSTYK     | NM_015375    | dual serine/threonine and tyrosine protein kinase             | 0 | 0 | 0 | 0 | 1 | 0 | 1 | 0 | hsa-miR-622 | -0.04 | N/A | Sites in UTR |
| BBC3      | NM_001127240 | BCL2 binding component 3                                      | 1 | 0 | 1 | 0 | 0 | 0 | 0 | 0 | hsa-miR-622 | -0.04 | N/A | Sites in UTR |
| NSFL1C    | NM_001206736 | NSFL1 (p97) cofactor (p47)                                    | 0 | 0 | 0 | 0 | 1 | 0 | 1 | 0 | hsa-miR-622 | -0.04 | N/A | Sites in UTR |
| PTBP2     | NM_021190    | polypyrimidine tract binding protein 2                        | 1 | 0 | 1 | 0 | 0 | 0 | 0 | 0 | hsa-miR-622 | -0.04 | N/A | Sites in UTR |
| MAPK1IP1L | NM_144578    | mitogen-activated protein kinase 1 interacting protein 1-like | 0 | 0 | 0 | 0 | 1 | 0 | 1 | 0 | hsa-miR-622 | -0.04 | N/A | Sites in UTR |

|         |              |                                                                                |   |   |   |   |   |   |   |   |             |       |     |              |
|---------|--------------|--------------------------------------------------------------------------------|---|---|---|---|---|---|---|---|-------------|-------|-----|--------------|
| FGFBP3  | NM_152429    | fibroblast growth factor binding protein 3                                     | 0 | 0 | 0 | 0 | 1 | 0 | 1 | 0 | hsa-miR-622 | -0.04 | N/A | Sites in UTR |
| SLC7A2  | NM_001008539 | solute carrier family 7 (cationic amino acid transporter, y+ system), member 2 | 0 | 0 | 0 | 0 | 1 | 0 | 0 | 1 | hsa-miR-622 | -0.04 | N/A | Sites in UTR |
| C3orf19 | NM_016474    | chromosome 3 open reading frame 19                                             | 0 | 0 | 0 | 0 | 1 | 0 | 0 | 1 | hsa-miR-622 | -0.04 | N/A | Sites in UTR |
| PHIP    | NM_017934    | pleckstrin homology domain interacting protein                                 | 1 | 0 | 0 | 1 | 0 | 0 | 0 | 0 | hsa-miR-622 | -0.04 | N/A | Sites in UTR |
| STAMPB  | NM_006463    | STAM binding protein                                                           | 0 | 0 | 0 | 0 | 1 | 1 | 0 | 0 | hsa-miR-622 | -0.04 | N/A | Sites in UTR |
| RHOBTB3 | NM_014899    | Rho-related BTB domain containing 3                                            | 0 | 0 | 0 | 0 | 1 | 1 | 0 | 0 | hsa-miR-622 | -0.04 | N/A | Sites in UTR |
| CNN1    | NM_001299    | calponin 1, basic, smooth muscle                                               | 0 | 0 | 0 | 0 | 1 | 0 | 1 | 0 | hsa-miR-622 | -0.04 | N/A | Sites in UTR |
| NFE2L1  | NM_003204    | nuclear factor (erythroid-derived 2)-like 1                                    | 0 | 0 | 0 | 0 | 1 | 0 | 1 | 0 | hsa-miR-622 | -0.04 | N/A | Sites in UTR |
| CD164   | NM_001142401 | CD164 molecule, sialomucin                                                     | 0 | 0 | 0 | 0 | 1 | 0 | 1 | 0 | hsa-miR-622 | -0.04 | N/A | Sites in UTR |
| SCD5    | NM_001037582 | stearoyl-CoA desaturase 5                                                      | 0 | 0 | 0 | 0 | 1 | 0 | 1 | 0 | hsa-miR-622 | -0.04 | N/A | Sites in UTR |
| IFNAR1  | NM_000629    | interferon (alpha, beta and omega) receptor 1                                  | 0 | 0 | 0 | 0 | 2 | 0 | 1 | 1 | hsa-miR-622 | -0.04 | N/A | Sites in UTR |
| INPP5B  | NM_005540    | inositol polyphosphate-5-phosphatase, 75kDa                                    | 0 | 0 | 0 | 0 | 1 | 0 | 0 | 1 | hsa-miR-622 | -0.04 | N/A | Sites in UTR |
| SLC17A4 | NM_005495    | solute carrier family 17 (sodium phosphate), member 4                          | 0 | 0 | 0 | 0 | 1 | 0 | 0 | 1 | hsa-miR-622 | -0.04 | N/A | Sites in UTR |
| DUSP16  | NM_030640    | dual specificity phosphatase 16                                                | 1 | 0 | 0 | 1 | 0 | 0 | 0 | 0 | hsa-miR-622 | -0.04 | N/A | Sites in UTR |
| PLA2G4E | NM_001206670 | phospholipase A2, group IVE                                                    | 0 | 0 | 0 | 0 | 1 | 0 | 0 | 1 | hsa-miR-622 | -0.04 | N/A | Sites in UTR |
| SRRM3   | NM_001110199 | serine/arginine repetitive matrix 3                                            | 0 | 0 | 0 | 0 | 1 | 0 | 0 | 1 | hsa-miR-622 | -0.04 | N/A | Sites in UTR |
| FBXW2   | NM_012164    | F-box and WD repeat domain containing 2                                        | 0 | 0 | 0 | 0 | 1 | 1 | 0 | 0 | hsa-miR-622 | -0.04 | N/A | Sites in UTR |
| TSPYL5  | NM_033512    | TSPY-like 5                                                                    | 0 | 0 | 0 | 0 | 1 | 1 | 0 | 0 | hsa-miR-622 | -0.04 | N/A | Sites in UTR |

|           |              |                                                                                          |   |   |   |   |   |   |   |   |             |       |     |              |
|-----------|--------------|------------------------------------------------------------------------------------------|---|---|---|---|---|---|---|---|-------------|-------|-----|--------------|
| CNGB1     | NM_001297    | cyclic nucleotide gated channel beta 1                                                   | 0 | 0 | 0 | 0 | 1 | 0 | 1 | 0 | hsa-miR-622 | -0.04 | N/A | Sites in UTR |
| PRKAA2    | NM_006252    | protein kinase, AMP-activated, alpha 2 catalytic subunit                                 | 1 | 0 | 1 | 0 | 0 | 0 | 0 | 0 | hsa-miR-622 | -0.04 | N/A | Sites in UTR |
| SOX13     | NM_005686    | SRY (sex determining region Y)-box 13                                                    | 0 | 0 | 0 | 0 | 1 | 0 | 1 | 0 | hsa-miR-622 | -0.04 | N/A | Sites in UTR |
| NLN       | NM_020726    | neurolysin (metallopeptidase M3 family)                                                  | 0 | 0 | 0 | 0 | 1 | 0 | 1 | 0 | hsa-miR-622 | -0.04 | N/A | Sites in UTR |
| PRRG4     | NM_024081    | proline rich Gla (G-carboxyglutamic acid) 4 (transmembrane)                              | 0 | 0 | 0 | 0 | 1 | 0 | 1 | 0 | hsa-miR-622 | -0.04 | N/A | Sites in UTR |
| FAM102A   | NM_001035254 | family with sequence similarity 102, member A                                            | 0 | 0 | 0 | 0 | 2 | 0 | 1 | 1 | hsa-miR-622 | -0.04 | N/A | Sites in UTR |
| RIC3      | NM_001135109 | resistance to inhibitors of cholinesterase 3 homolog (C. elegans)                        | 0 | 0 | 0 | 0 | 2 | 0 | 1 | 1 | hsa-miR-622 | -0.04 | N/A | Sites in UTR |
| MYCBP     | NM_012333    | c-myc binding protein                                                                    | 1 | 0 | 0 | 1 | 0 | 0 | 0 | 0 | hsa-miR-622 | -0.04 | N/A | Sites in UTR |
| ZNF701    | NM_001172655 | zinc finger protein 701                                                                  | 0 | 0 | 0 | 0 | 1 | 0 | 0 | 1 | hsa-miR-622 | -0.04 | N/A | Sites in UTR |
| PAPD4     | NM_001114393 | PAP associated domain containing 4                                                       | 0 | 0 | 0 | 0 | 1 | 0 | 0 | 1 | hsa-miR-622 | -0.04 | N/A | Sites in UTR |
| C14orf182 | NM_001012706 | chromosome 14 open reading frame 182                                                     | 0 | 0 | 0 | 0 | 1 | 0 | 0 | 1 | hsa-miR-622 | -0.04 | N/A | Sites in UTR |
| CTDSPL2   | NM_016396    | CTD (carboxy-terminal domain, RNA polymerase II, polypeptide A) small phosphatase like 2 | 1 | 0 | 1 | 0 | 0 | 0 | 0 | 0 | hsa-miR-622 | -0.04 | N/A | Sites in UTR |
| SYAP1     | NM_032796    | synapse associated protein 1                                                             | 0 | 0 | 0 | 0 | 1 | 0 | 1 | 0 | hsa-miR-622 | -0.04 | N/A | Sites in UTR |
| GNL1      | NM_005275    | guanine nucleotide binding protein-like 1                                                | 0 | 0 | 0 | 0 | 2 | 0 | 1 | 1 | hsa-miR-622 | -0.04 | N/A | Sites in UTR |
| ATXN3     | NM_001127696 | ataxin 3                                                                                 | 0 | 0 | 0 | 0 | 2 | 0 | 1 | 1 | hsa-miR-622 | -0.04 | N/A | Sites in UTR |
| CALN1     | NM_001017440 | calneuron 1                                                                              | 0 | 0 | 0 | 0 | 2 | 0 | 1 | 1 | hsa-miR-622 | -0.04 | N/A | Sites in UTR |
| FZD1      | NM_003505    | frizzled family receptor 1                                                               | 0 | 0 | 0 | 0 | 1 | 0 | 0 | 1 | hsa-miR-622 | -0.04 | N/A | Sites in UTR |
| MPDU1     | NM_004870    | mannose-P-dolichol utilization defect 1                                                  | 0 | 0 | 0 | 0 | 1 | 0 | 0 | 1 | hsa-miR-622 | -0.04 | N/A | Sites in UTR |

|          |              |                                                              |   |   |   |   |   |   |   |   |             |       |     |              |
|----------|--------------|--------------------------------------------------------------|---|---|---|---|---|---|---|---|-------------|-------|-----|--------------|
| TRIM62   | NM_018207    | tripartite motif containing 62                               | 0 | 0 | 0 | 0 | 1 | 0 | 0 | 1 | hsa-miR-622 | -0.04 | N/A | Sites in UTR |
| ZKSCAN2  | NM_001012981 | zinc finger with KRAB and SCAN domains 2                     | 0 | 0 | 0 | 0 | 1 | 0 | 0 | 1 | hsa-miR-622 | -0.04 | N/A | Sites in UTR |
| CACNA1D  | NM_000720    | calcium channel, voltage-dependent, L type, alpha 1D subunit | 0 | 0 | 0 | 0 | 1 | 0 | 1 | 0 | hsa-miR-622 | -0.04 | N/A | Sites in UTR |
| ZNF747   | NM_023931    | zinc finger protein 747                                      | 1 | 0 | 1 | 0 | 0 | 0 | 0 | 0 | hsa-miR-622 | -0.04 | N/A | Sites in UTR |
| TIGD6    | NM_030953    | tigger transposable element derived 6                        | 0 | 0 | 0 | 0 | 1 | 0 | 1 | 0 | hsa-miR-622 | -0.04 | N/A | Sites in UTR |
| C16orf54 | NM_175900    | chromosome 16 open reading frame 54                          | 0 | 0 | 0 | 0 | 1 | 0 | 1 | 0 | hsa-miR-622 | -0.04 | N/A | Sites in UTR |
| DLG2     | NM_001142699 | discs, large homolog 2 (Drosophila)                          | 0 | 0 | 0 | 0 | 2 | 0 | 1 | 1 | hsa-miR-622 | -0.04 | N/A | Sites in UTR |
| UBIAD1   | NM_013319    | UbiA prenyltransferase domain containing 1                   | 0 | 0 | 0 | 0 | 1 | 1 | 0 | 0 | hsa-miR-622 | -0.04 | N/A | Sites in UTR |
| DACH1    | NM_004392    | dachshund homolog 1 (Drosophila)                             | 0 | 0 | 0 | 0 | 1 | 0 | 0 | 1 | hsa-miR-622 | -0.04 | N/A | Sites in UTR |
| PRKACB   | NM_001242857 | protein kinase, cAMP-dependent, catalytic, beta              | 0 | 0 | 0 | 0 | 1 | 0 | 0 | 1 | hsa-miR-622 | -0.04 | N/A | Sites in UTR |
| RP2      | NM_006915    | retinitis pigmentosa 2 (X-linked recessive)                  | 0 | 0 | 0 | 0 | 1 | 0 | 0 | 1 | hsa-miR-622 | -0.04 | N/A | Sites in UTR |
| UBE2R2   | NM_017811    | ubiquitin-conjugating enzyme E2R 2                           | 0 | 0 | 0 | 0 | 1 | 0 | 0 | 1 | hsa-miR-622 | -0.04 | N/A | Sites in UTR |
| PSAPL1   | NM_001085382 | prosaposin-like 1 (gene/pseudogene)                          | 0 | 0 | 0 | 0 | 1 | 0 | 0 | 1 | hsa-miR-622 | -0.04 | N/A | Sites in UTR |
| CTSH     | NM_004390    | cathepsin H                                                  | 0 | 0 | 0 | 0 | 1 | 0 | 1 | 0 | hsa-miR-622 | -0.04 | N/A | Sites in UTR |
| DGCR14   | NM_022719    | DiGeorge syndrome critical region gene 14                    | 0 | 0 | 0 | 0 | 1 | 0 | 1 | 0 | hsa-miR-622 | -0.04 | N/A | Sites in UTR |
| GAB2     | NM_012296    | GRB2-associated binding protein 2                            | 0 | 0 | 0 | 0 | 1 | 0 | 1 | 0 | hsa-miR-622 | -0.04 | N/A | Sites in UTR |
| UBN1     | NM_001079514 | ubnuclein 1                                                  | 0 | 0 | 0 | 0 | 1 | 0 | 1 | 0 | hsa-miR-622 | -0.04 | N/A | Sites in UTR |
| ZC3H12C  | NM_033390    | zinc finger CCCH-type containing 12C                         | 0 | 0 | 0 | 0 | 1 | 0 | 1 | 0 | hsa-miR-622 | -0.04 | N/A | Sites in UTR |

|          |              |                                                                     |   |   |   |   |   |   |   |   |             |       |     |              |
|----------|--------------|---------------------------------------------------------------------|---|---|---|---|---|---|---|---|-------------|-------|-----|--------------|
| C19orf25 | NM_152482    | chromosome 19 open reading frame 25                                 | 0 | 0 | 0 | 0 | 1 | 0 | 1 | 0 | hsa-miR-622 | -0.04 | N/A | Sites in UTR |
| TP73     | NM_001126240 | tumor protein p73                                                   | 0 | 0 | 0 | 0 | 1 | 1 | 0 | 0 | hsa-miR-622 | -0.03 | N/A | Sites in UTR |
| CD36     | NM_001001548 | CD36 molecule (thrombospondin receptor)                             | 0 | 0 | 0 | 0 | 1 | 0 | 0 | 1 | hsa-miR-622 | -0.03 | N/A | Sites in UTR |
| KDR      | NM_002253    | kinase insert domain receptor (a type III receptor tyrosine kinase) | 0 | 0 | 0 | 0 | 1 | 0 | 0 | 1 | hsa-miR-622 | -0.03 | N/A | Sites in UTR |
| MAP3K9   | NM_033141    | mitogen-activated protein kinase kinase kinase 9                    | 0 | 0 | 0 | 0 | 1 | 0 | 0 | 1 | hsa-miR-622 | -0.03 | N/A | Sites in UTR |
| ZFYVE16  | NM_001105251 | zinc finger, FYVE domain containing 16                              | 0 | 0 | 0 | 0 | 1 | 0 | 0 | 1 | hsa-miR-622 | -0.03 | N/A | Sites in UTR |
| SLC39A9  | NM_018375    | solute carrier family 39 (zinc transporter), member 9               | 0 | 0 | 0 | 0 | 1 | 0 | 0 | 1 | hsa-miR-622 | -0.03 | N/A | Sites in UTR |
| ATG9A    | NM_001077198 | ATG9 autophagy related 9 homolog A ( <i>S. cerevisiae</i> )         | 0 | 0 | 0 | 0 | 1 | 0 | 0 | 1 | hsa-miR-622 | -0.03 | N/A | Sites in UTR |
| SGIP1    | NM_032291    | SH3-domain GRB2-like (endophilin) interacting protein 1             | 0 | 0 | 0 | 0 | 1 | 0 | 0 | 1 | hsa-miR-622 | -0.03 | N/A | Sites in UTR |
| GLP1R    | NM_002062    | glucagon-like peptide 1 receptor                                    | 0 | 0 | 0 | 0 | 1 | 0 | 1 | 0 | hsa-miR-622 | -0.03 | N/A | Sites in UTR |
| MRAS     | NM_001085049 | muscle RAS oncogene homolog                                         | 0 | 0 | 0 | 0 | 1 | 0 | 1 | 0 | hsa-miR-622 | -0.03 | N/A | Sites in UTR |
| ACTR8    | NM_022899    | ARP8 actin-related protein 8 homolog (yeast)                        | 0 | 0 | 0 | 0 | 1 | 0 | 1 | 0 | hsa-miR-622 | -0.03 | N/A | Sites in UTR |
| DUSP18   | NM_152511    | dual specificity phosphatase 18                                     | 0 | 0 | 0 | 0 | 1 | 0 | 1 | 0 | hsa-miR-622 | -0.03 | N/A | Sites in UTR |
| DAB2IP   | NM_032552    | DAB2 interacting protein                                            | 0 | 0 | 0 | 0 | 1 | 0 | 1 | 0 | hsa-miR-622 | -0.03 | N/A | Sites in UTR |
| LARP4    | NM_001170803 | La ribonucleoprotein domain family, member 4                        | 0 | 0 | 0 | 0 | 1 | 1 | 0 | 0 | hsa-miR-622 | -0.03 | N/A | Sites in UTR |
| ABCC1    | NM_004996    | ATP-binding cassette, sub-family C (CFTR/MRP), member 1             | 0 | 0 | 0 | 0 | 1 | 0 | 0 | 1 | hsa-miR-622 | -0.03 | N/A | Sites in UTR |
| SYP      | NM_003179    | synaptophysin                                                       | 0 | 0 | 0 | 0 | 1 | 0 | 0 | 1 | hsa-miR-622 | -0.03 | N/A | Sites in UTR |
| MOSPD1   | NM_019556    | motile sperm domain containing 1                                    | 0 | 0 | 0 | 0 | 1 | 0 | 1 | 0 | hsa-miR-622 | -0.03 | N/A | Sites in UTR |

|           |              |                                                                         |   |   |   |   |   |   |   |   |             |       |     |              |
|-----------|--------------|-------------------------------------------------------------------------|---|---|---|---|---|---|---|---|-------------|-------|-----|--------------|
| TNRC18    | NM_001080495 | trinucleotide repeat containing 18                                      | 0 | 0 | 0 | 0 | 1 | 0 | 1 | 0 | hsa-miR-622 | -0.03 | N/A | Sites in UTR |
| CDK2      | NM_001798    | cyclin-dependent kinase 2                                               | 0 | 0 | 0 | 0 | 1 | 0 | 0 | 1 | hsa-miR-622 | -0.03 | N/A | Sites in UTR |
| WNT7B     | NM_058238    | wingless-type MMTV integration site family, member 7B                   | 0 | 0 | 0 | 0 | 1 | 0 | 0 | 1 | hsa-miR-622 | -0.03 | N/A | Sites in UTR |
| ProSAPIP1 | NM_014731    | ProSAPIP1 protein                                                       | 0 | 0 | 0 | 0 | 1 | 0 | 0 | 1 | hsa-miR-622 | -0.03 | N/A | Sites in UTR |
| POLD3     | NM_006591    | polymerase (DNA-directed), delta 3, accessory subunit                   | 0 | 0 | 0 | 0 | 1 | 0 | 0 | 1 | hsa-miR-622 | -0.03 | N/A | Sites in UTR |
| C2orf88   | NM_001042519 | chromosome 2 open reading frame 88                                      | 0 | 0 | 0 | 0 | 1 | 0 | 0 | 1 | hsa-miR-622 | -0.03 | N/A | Sites in UTR |
| FXR1      | NM_001013438 | fragile X mental retardation, autosomal homolog 1                       | 0 | 0 | 0 | 0 | 1 | 0 | 1 | 0 | hsa-miR-622 | -0.03 | N/A | Sites in UTR |
| CA5B      | NM_007220    | carbonic anhydrase VB, mitochondrial                                    | 1 | 0 | 1 | 0 | 0 | 0 | 0 | 0 | hsa-miR-622 | -0.03 | N/A | Sites in UTR |
| REXO1L1   | NM_172239    | REX1, RNA exonuclease 1 homolog (S. cerevisiae)-like 1                  | 0 | 0 | 0 | 0 | 2 | 0 | 1 | 1 | hsa-miR-622 | -0.03 | N/A | Sites in UTR |
| C11orf58  | NM_014267    | chromosome 11 open reading frame 58                                     | 0 | 0 | 0 | 0 | 1 | 0 | 0 | 1 | hsa-miR-622 | -0.03 | N/A | Sites in UTR |
| KIAA1755  | NM_001029864 | KIAA1755                                                                | 0 | 0 | 0 | 0 | 1 | 0 | 0 | 1 | hsa-miR-622 | -0.03 | N/A | Sites in UTR |
| METTL2A   | NM_181725    | methyltransferase like 2A                                               | 0 | 0 | 0 | 0 | 1 | 0 | 0 | 1 | hsa-miR-622 | -0.03 | N/A | Sites in UTR |
| SH2B3     | NM_005475    | SH2B adaptor protein 3                                                  | 0 | 0 | 0 | 0 | 1 | 0 | 1 | 0 | hsa-miR-622 | -0.03 | N/A | Sites in UTR |
| IKZF1     | NM_001220765 | IKAROS family zinc finger 1 (Ikaros)                                    | 0 | 0 | 0 | 0 | 1 | 0 | 1 | 0 | hsa-miR-622 | -0.03 | N/A | Sites in UTR |
| SLC24A2   | NM_001193288 | solute carrier family 24 (sodium/potassium/calcium exchanger), member 2 | 0 | 0 | 0 | 0 | 1 | 0 | 1 | 0 | hsa-miR-622 | -0.03 | N/A | Sites in UTR |
| TMEM135   | NM_001168724 | transmembrane protein 135                                               | 0 | 0 | 0 | 0 | 2 | 0 | 1 | 1 | hsa-miR-622 | -0.03 | N/A | Sites in UTR |
| ADRA2B    | NM_000682    | adrenergic, alpha-2B-, receptor                                         | 0 | 0 | 0 | 0 | 1 | 0 | 0 | 1 | hsa-miR-622 | -0.03 | N/A | Sites in UTR |
| RIPK1     | NM_003804    | receptor (TNFRSF)-interacting serine-threonine kinase 1                 | 0 | 0 | 0 | 0 | 1 | 0 | 0 | 1 | hsa-miR-622 | -0.03 | N/A | Sites in UTR |

|         |              |                                                                               |   |   |   |   |   |   |   |   |             |       |     |              |
|---------|--------------|-------------------------------------------------------------------------------|---|---|---|---|---|---|---|---|-------------|-------|-----|--------------|
| HOXB13  | NM_006361    | homeobox B13                                                                  | 0 | 0 | 0 | 0 | 1 | 0 | 0 | 1 | hsa-miR-622 | -0.03 | N/A | Sites in UTR |
| PLEKHG1 | NM_001029884 | pleckstrin homology domain containing, family G (with RhoGef domain) member 1 | 0 | 0 | 0 | 0 | 1 | 0 | 0 | 1 | hsa-miR-622 | -0.03 | N/A | Sites in UTR |
| NCOR2   | NM_001077261 | nuclear receptor corepressor 2                                                | 0 | 0 | 0 | 0 | 1 | 0 | 1 | 0 | hsa-miR-622 | -0.03 | N/A | Sites in UTR |
| GPRC5B  | NM_016235    | G protein-coupled receptor, family C, group 5, member B                       | 0 | 0 | 0 | 0 | 1 | 0 | 1 | 0 | hsa-miR-622 | -0.03 | N/A | Sites in UTR |
| APOLD1  | NM_001130415 | apolipoprotein L domain containing 1                                          | 0 | 0 | 0 | 0 | 1 | 0 | 1 | 0 | hsa-miR-622 | -0.03 | N/A | Sites in UTR |
| NUDT4   | NM_019094    | nudix (nucleoside diphosphate linked moiety X)-type motif 4                   | 0 | 0 | 0 | 0 | 1 | 0 | 0 | 1 | hsa-miR-622 | -0.03 | N/A | Sites in UTR |
| ZNF654  | NM_018293    | zinc finger protein 654                                                       | 0 | 0 | 0 | 0 | 1 | 0 | 0 | 1 | hsa-miR-622 | -0.03 | N/A | Sites in UTR |
| SLC35E3 | NM_018656    | solute carrier family 35, member E3                                           | 0 | 0 | 0 | 0 | 1 | 0 | 0 | 1 | hsa-miR-622 | -0.03 | N/A | Sites in UTR |
| EIF5A2  | NM_020390    | eukaryotic translation initiation factor 5A2                                  | 0 | 0 | 0 | 0 | 1 | 0 | 0 | 1 | hsa-miR-622 | -0.03 | N/A | Sites in UTR |
| ARF1    | NM_001024226 | ADP-ribosylation factor 1                                                     | 0 | 0 | 0 | 0 | 1 | 0 | 1 | 0 | hsa-miR-622 | -0.03 | N/A | Sites in UTR |
| TPCN1   | NM_001143819 | two pore segment channel 1                                                    | 0 | 0 | 0 | 0 | 1 | 0 | 1 | 0 | hsa-miR-622 | -0.03 | N/A | Sites in UTR |
| CYP26B1 | NM_019885    | cytochrome P450, family 26, subfamily B, polypeptide 1                        | 1 | 0 | 1 | 0 | 0 | 0 | 0 | 0 | hsa-miR-622 | -0.03 | N/A | Sites in UTR |
| NPAS4   | NM_178864    | neuronal PAS domain protein 4                                                 | 0 | 0 | 0 | 0 | 1 | 0 | 1 | 0 | hsa-miR-622 | -0.03 | N/A | Sites in UTR |
| ENG     | NM_000118    | endoglin                                                                      | 0 | 0 | 0 | 0 | 1 | 0 | 0 | 1 | hsa-miR-622 | -0.03 | N/A | Sites in UTR |
| FOXP1   | NM_032682    | forkhead box P1                                                               | 0 | 0 | 0 | 0 | 1 | 0 | 0 | 1 | hsa-miR-622 | -0.03 | N/A | Sites in UTR |
| TATDN2  | NM_014760    | TatD DNase domain containing 2                                                | 0 | 0 | 0 | 0 | 1 | 0 | 1 | 0 | hsa-miR-622 | -0.03 | N/A | Sites in UTR |
| DRAM1   | NM_018370    | DNA-damage regulated autophagy modulator 1                                    | 0 | 0 | 0 | 0 | 1 | 0 | 1 | 0 | hsa-miR-622 | -0.03 | N/A | Sites in UTR |
| INTS2   | NM_020748    | integrator complex subunit 2                                                  | 0 | 0 | 0 | 0 | 1 | 0 | 1 | 0 | hsa-miR-622 | -0.03 | N/A | Sites in UTR |

|         |              |                                                                                                      |   |   |   |   |   |   |   |   |             |       |     |              |
|---------|--------------|------------------------------------------------------------------------------------------------------|---|---|---|---|---|---|---|---|-------------|-------|-----|--------------|
| SEC62   | NM_003262    | SEC62 homolog (S. cerevisiae)                                                                        | 0 | 0 | 0 | 0 | 1 | 0 | 0 | 1 | hsa-miR-622 | -0.03 | N/A | Sites in UTR |
| AMMECR1 | NM_001025580 | Alport syndrome, mental retardation, midface hypoplasia and elliptocytosis chromosomal region gene 1 | 0 | 0 | 0 | 0 | 1 | 0 | 1 | 0 | hsa-miR-622 | -0.03 | N/A | Sites in UTR |
| CCDC88C | NM_001080414 | coiled-coil domain containing 88C                                                                    | 0 | 0 | 0 | 0 | 1 | 0 | 1 | 0 | hsa-miR-622 | -0.03 | N/A | Sites in UTR |
| CORO1C  | NM_014325    | coronin, actin binding protein, 1C                                                                   | 0 | 0 | 0 | 0 | 2 | 0 | 0 | 2 | hsa-miR-622 | -0.03 | N/A | Sites in UTR |
| OCRL    | NM_000276    | oculocerebrorenal syndrome of Lowe                                                                   | 0 | 0 | 0 | 0 | 1 | 0 | 0 | 1 | hsa-miR-622 | -0.03 | N/A | Sites in UTR |
| PTGIS   | NM_000961    | prostaglandin I2 (prostacyclin) synthase                                                             | 0 | 0 | 0 | 0 | 1 | 0 | 0 | 1 | hsa-miR-622 | -0.03 | N/A | Sites in UTR |
| UNC5B   | NM_170744    | unc-5 homolog B (C. elegans)                                                                         | 0 | 0 | 0 | 0 | 1 | 0 | 0 | 1 | hsa-miR-622 | -0.03 | N/A | Sites in UTR |
| SMG1    | NM_015092    | smg-1 homolog, phosphatidylinositol 3-kinase-related kinase (C. elegans)                             | 0 | 0 | 0 | 0 | 2 | 0 | 0 | 2 | hsa-miR-622 | -0.03 | N/A | Sites in UTR |
| CYP27C1 | NM_001001665 | cytochrome P450, family 27, subfamily C, polypeptide 1                                               | 0 | 0 | 0 | 0 | 2 | 0 | 0 | 2 | hsa-miR-622 | -0.03 | N/A | Sites in UTR |
| BMS1    | NM_014753    | BMS1 homolog, ribosome assembly protein (yeast)                                                      | 0 | 0 | 0 | 0 | 1 | 0 | 1 | 0 | hsa-miR-622 | -0.03 | N/A | Sites in UTR |
| SF3A1   | NM_001005409 | splicing factor 3a, subunit 1, 120kDa                                                                | 0 | 0 | 0 | 0 | 1 | 0 | 1 | 0 | hsa-miR-622 | -0.03 | N/A | Sites in UTR |
| SIRPB2  | NM_001122962 | signal-regulatory protein beta 2                                                                     | 0 | 0 | 0 | 0 | 1 | 0 | 1 | 0 | hsa-miR-622 | -0.03 | N/A | Sites in UTR |
| EYS     | NM_001142801 | eyes shut homolog (Drosophila)                                                                       | 0 | 0 | 0 | 0 | 1 | 0 | 1 | 0 | hsa-miR-622 | -0.03 | N/A | Sites in UTR |
| ITGA11  | NM_001004439 | integrin, alpha 11                                                                                   | 0 | 0 | 0 | 0 | 1 | 0 | 0 | 1 | hsa-miR-622 | -0.03 | N/A | Sites in UTR |
| TMEM213 | NM_001085429 | transmembrane protein 213                                                                            | 0 | 0 | 0 | 0 | 1 | 0 | 0 | 1 | hsa-miR-622 | -0.03 | N/A | Sites in UTR |
| NWD1    | NM_001007525 | NACHT and WD repeat domain containing 1                                                              | 0 | 0 | 0 | 0 | 1 | 0 | 0 | 1 | hsa-miR-622 | -0.03 | N/A | Sites in UTR |
| ZCCHC16 | NM_001004308 | zinc finger, CCHC domain containing 16                                                               | 0 | 0 | 0 | 0 | 1 | 0 | 0 | 1 | hsa-miR-622 | -0.03 | N/A | Sites in UTR |
| RRM2B   | NM_001172477 | ribonucleotide reductase M2 B (TP53 inducible)                                                       | 0 | 0 | 0 | 0 | 1 | 0 | 0 | 1 | hsa-miR-622 | -0.02 | N/A | Sites in UTR |



|         |              |                                                                               |   |   |   |   |   |   |   |   |             |       |     |              |
|---------|--------------|-------------------------------------------------------------------------------|---|---|---|---|---|---|---|---|-------------|-------|-----|--------------|
| GABRB3  | NM_000814    | gamma-aminobutyric acid (GABA) A receptor, beta 3                             | 0 | 0 | 0 | 0 | 2 | 0 | 0 | 2 | hsa-miR-622 | -0.02 | N/A | Sites in UTR |
| SYNPO2L | NM_001114133 | synaptopodin 2-like                                                           | 0 | 0 | 0 | 0 | 1 | 0 | 0 | 1 | hsa-miR-622 | -0.02 | N/A | Sites in UTR |
| SPIN3   | NM_001010862 | spindlin family, member 3                                                     | 0 | 0 | 0 | 0 | 1 | 0 | 0 | 1 | hsa-miR-622 | -0.02 | N/A | Sites in UTR |
| ADORA2A | NM_000675    | adenosine A2a receptor                                                        | 0 | 0 | 0 | 0 | 1 | 0 | 1 | 0 | hsa-miR-622 | -0.02 | N/A | Sites in UTR |
| TLX3    | NM_021025    | T-cell leukemia homeobox 3                                                    | 0 | 0 | 0 | 0 | 1 | 0 | 1 | 0 | hsa-miR-622 | -0.02 | N/A | Sites in UTR |
| TTC23   | NM_001040655 | tetratricopeptide repeat domain 23                                            | 0 | 0 | 0 | 0 | 1 | 0 | 1 | 0 | hsa-miR-622 | -0.02 | N/A | Sites in UTR |
| SCARB2  | NM_001204255 | scavenger receptor class B, member 2                                          | 0 | 0 | 0 | 0 | 1 | 0 | 0 | 1 | hsa-miR-622 | -0.02 | N/A | Sites in UTR |
| IL1R1   | NM_000877    | interleukin 1 receptor, type I                                                | 0 | 0 | 0 | 0 | 1 | 0 | 0 | 1 | hsa-miR-622 | -0.02 | N/A | Sites in UTR |
| LTBP3   | NM_001130144 | latent transforming growth factor beta binding protein 3                      | 0 | 0 | 0 | 0 | 1 | 0 | 0 | 1 | hsa-miR-622 | -0.02 | N/A | Sites in UTR |
| VHL     | NM_000551    | von Hippel-Lindau tumor suppressor                                            | 0 | 0 | 0 | 0 | 1 | 0 | 0 | 1 | hsa-miR-622 | -0.02 | N/A | Sites in UTR |
| ATP8A1  | NM_001105529 | ATPase, aminophospholipid transporter (APLT), class I, type 8A, member 1      | 0 | 0 | 0 | 0 | 1 | 0 | 0 | 1 | hsa-miR-622 | -0.02 | N/A | Sites in UTR |
| TGIF2   | NM_001199513 | TGFB-induced factor homeobox 2                                                | 0 | 0 | 0 | 0 | 1 | 0 | 0 | 1 | hsa-miR-622 | -0.02 | N/A | Sites in UTR |
| OTX1    | NM_001199770 | orthodenticle homeobox 1                                                      | 0 | 0 | 0 | 0 | 1 | 0 | 1 | 0 | hsa-miR-622 | -0.02 | N/A | Sites in UTR |
| PML     | NM_033238    | promyelocytic leukemia                                                        | 0 | 0 | 0 | 0 | 1 | 0 | 1 | 0 | hsa-miR-622 | -0.02 | N/A | Sites in UTR |
| ZIC3    | NM_003413    | Zic family member 3                                                           | 0 | 0 | 0 | 0 | 1 | 0 | 0 | 1 | hsa-miR-622 | -0.02 | N/A | Sites in UTR |
| ANKRD22 | NM_144590    | ankyrin repeat domain 22                                                      | 0 | 0 | 0 | 0 | 1 | 0 | 0 | 1 | hsa-miR-622 | -0.02 | N/A | Sites in UTR |
| CELSR1  | NM_014246    | cadherin, EGF LAG seven-pass G-type receptor 1 (flamingo homolog, Drosophila) | 0 | 0 | 0 | 0 | 1 | 0 | 1 | 0 | hsa-miR-622 | -0.02 | N/A | Sites in UTR |
| CTNBP1  | NM_001012329 | catenin, beta interacting protein 1                                           | 0 | 0 | 0 | 0 | 1 | 0 | 1 | 0 | hsa-miR-622 | -0.02 | N/A | Sites in UTR |

|          |              |                                                                                 |   |   |   |   |   |   |   |   |             |       |     |              |
|----------|--------------|---------------------------------------------------------------------------------|---|---|---|---|---|---|---|---|-------------|-------|-----|--------------|
| CA7      | NM_001014435 | carbonic anhydrase VII                                                          | 0 | 0 | 0 | 0 | 1 | 0 | 0 | 1 | hsa-miR-622 | -0.02 | N/A | Sites in UTR |
| MAP3K3   | NM_002401    | mitogen-activated protein kinase kinase kinase 3                                | 0 | 0 | 0 | 0 | 1 | 0 | 0 | 1 | hsa-miR-622 | -0.02 | N/A | Sites in UTR |
| RABEP1   | NM_001083585 | rabaptin, RAB GTPase binding effector protein 1                                 | 0 | 0 | 0 | 0 | 1 | 0 | 0 | 1 | hsa-miR-622 | -0.02 | N/A | Sites in UTR |
| PCYOX1   | NM_016297    | prenylcysteine oxidase 1                                                        | 0 | 0 | 0 | 0 | 1 | 0 | 0 | 1 | hsa-miR-622 | -0.02 | N/A | Sites in UTR |
| FAM46C   | NM_017709    | family with sequence similarity 46, member C                                    | 0 | 0 | 0 | 0 | 1 | 0 | 0 | 1 | hsa-miR-622 | -0.02 | N/A | Sites in UTR |
| SLITRK4  | NM_001184749 | SLIT and NTRK-like family, member 4                                             | 0 | 0 | 0 | 0 | 1 | 0 | 0 | 1 | hsa-miR-622 | -0.02 | N/A | Sites in UTR |
| BRWD3    | NM_153252    | bromodomain and WD repeat domain containing 3                                   | 0 | 0 | 0 | 0 | 1 | 0 | 0 | 1 | hsa-miR-622 | -0.02 | N/A | Sites in UTR |
| PKNOX1   | NM_004571    | PBX/knotted 1 homeobox 1                                                        | 0 | 0 | 0 | 0 | 1 | 0 | 0 | 1 | hsa-miR-622 | -0.02 | N/A | Sites in UTR |
| RNF185   | NM_001135825 | ring finger protein 185                                                         | 0 | 0 | 0 | 0 | 1 | 0 | 0 | 1 | hsa-miR-622 | -0.02 | N/A | Sites in UTR |
| FRYL     | NM_015030    | FRY-like                                                                        | 0 | 0 | 0 | 0 | 1 | 0 | 0 | 1 | hsa-miR-622 | -0.02 | N/A | Sites in UTR |
| ARRB1    | NM_004041    | arrestin, beta 1                                                                | 0 | 0 | 0 | 0 | 1 | 0 | 0 | 1 | hsa-miR-622 | -0.02 | N/A | Sites in UTR |
| NAMPT    | NM_005746    | nicotinamide phosphoribosyltransferase                                          | 0 | 0 | 0 | 0 | 1 | 0 | 0 | 1 | hsa-miR-622 | -0.02 | N/A | Sites in UTR |
| RAB4B    | NM_016154    | RAB4B, member RAS oncogene family                                               | 1 | 0 | 0 | 1 | 0 | 0 | 0 | 0 | hsa-miR-622 | -0.02 | N/A | Sites in UTR |
| ARHGAP31 | NM_020754    | Rho GTPase activating protein 31                                                | 0 | 0 | 0 | 0 | 1 | 0 | 0 | 1 | hsa-miR-622 | -0.02 | N/A | Sites in UTR |
| ADIPOR2  | NM_024551    | adiponectin receptor 2                                                          | 0 | 0 | 0 | 0 | 1 | 0 | 0 | 1 | hsa-miR-622 | -0.02 | N/A | Sites in UTR |
| VAV3     | NM_001079874 | vav 3 guanine nucleotide exchange factor                                        | 0 | 0 | 0 | 0 | 1 | 0 | 0 | 1 | hsa-miR-622 | -0.02 | N/A | Sites in UTR |
| TGM2     | NM_004613    | transglutaminase 2 (C polypeptide, protein-glutamine-gamma-glutamyltransferase) | 0 | 0 | 0 | 0 | 1 | 0 | 0 | 1 | hsa-miR-622 | -0.02 | N/A | Sites in UTR |
| CUL3     | NM_003590    | cullin 3                                                                        | 0 | 0 | 0 | 0 | 1 | 0 | 0 | 1 | hsa-miR-622 | -0.02 | N/A | Sites in UTR |

|          |              |                                                       |   |   |   |   |   |   |   |   |             |       |     |              |
|----------|--------------|-------------------------------------------------------|---|---|---|---|---|---|---|---|-------------|-------|-----|--------------|
| SCAMP5   | NM_001178111 | secretory carrier membrane protein 5                  | 0 | 0 | 0 | 0 | 1 | 0 | 0 | 1 | hsa-miR-622 | -0.02 | N/A | Sites in UTR |
| ANKRD23  | NM_144994    | ankyrin repeat domain 23                              | 0 | 0 | 0 | 0 | 1 | 0 | 0 | 1 | hsa-miR-622 | -0.02 | N/A | Sites in UTR |
| PDE3B    | NM_000922    | phosphodiesterase 3B, cGMP-inhibited                  | 0 | 0 | 0 | 0 | 1 | 0 | 0 | 1 | hsa-miR-622 | -0.02 | N/A | Sites in UTR |
| PI15     | NM_015886    | peptidase inhibitor 15                                | 0 | 0 | 0 | 0 | 1 | 0 | 0 | 1 | hsa-miR-622 | -0.02 | N/A | Sites in UTR |
| OPA1     | NM_015560    | optic atrophy 1 (autosomal dominant)                  | 0 | 0 | 0 | 0 | 1 | 0 | 0 | 1 | hsa-miR-622 | -0.01 | N/A | Sites in UTR |
| CNTN2    | NM_005076    | contactin 2 (axonal)                                  | 0 | 0 | 0 | 0 | 1 | 0 | 0 | 1 | hsa-miR-622 | -0.01 | N/A | Sites in UTR |
| AMOTL2   | NM_016201    | angiomin like 2                                       | 0 | 0 | 0 | 0 | 1 | 0 | 0 | 1 | hsa-miR-622 | -0.01 | N/A | Sites in UTR |
| ARID2    | NM_152641    | AT rich interactive domain 2 (ARID, RFX-like)         | 1 | 0 | 0 | 1 | 0 | 0 | 0 | 0 | hsa-miR-622 | -0.01 | N/A | Sites in UTR |
| PLIN4    | NM_001080400 | perilipin 4                                           | 0 | 0 | 0 | 0 | 1 | 0 | 0 | 1 | hsa-miR-622 | -0.01 | N/A | Sites in UTR |
| TRAK1    | NM_014965    | trafficking protein, kinesin binding 1                | 0 | 0 | 0 | 0 | 1 | 0 | 0 | 1 | hsa-miR-622 | -0.01 | N/A | Sites in UTR |
| KIAA1456 | NM_001099677 | KIAA1456                                              | 0 | 0 | 0 | 0 | 1 | 0 | 0 | 1 | hsa-miR-622 | -0.01 | N/A | Sites in UTR |
| KIF3C    | NM_002254    | kinesin family member 3C                              | 0 | 0 | 0 | 0 | 1 | 0 | 0 | 1 | hsa-miR-622 | -0.01 | N/A | Sites in UTR |
| ANKH     | NM_054027    | ankylosis, progressive homolog (mouse)                | 1 | 0 | 0 | 1 | 0 | 0 | 0 | 0 | hsa-miR-622 | -0.01 | N/A | Sites in UTR |
| FAM73A   | NM_198549    | family with sequence similarity 73, member A          | 0 | 0 | 0 | 0 | 1 | 0 | 0 | 1 | hsa-miR-622 | -0.01 | N/A | Sites in UTR |
| PPP3R2   | NM_147180    | protein phosphatase 3, regulatory subunit B, beta     | 0 | 0 | 0 | 0 | 1 | 0 | 0 | 1 | hsa-miR-622 | -0.01 | N/A | Sites in UTR |
| CPSF6    | NM_007007    | cleavage and polyadenylation specific factor 6, 68kDa | 0 | 0 | 0 | 0 | 1 | 0 | 0 | 1 | hsa-miR-622 | -0.01 | N/A | Sites in UTR |
| RBM15B   | NM_013286    | RNA binding motif protein 15B                         | 0 | 0 | 0 | 0 | 1 | 0 | 0 | 1 | hsa-miR-622 | -0.01 | N/A | Sites in UTR |
| TM7SF3   | NM_016551    | transmembrane 7 superfamily member 3                  | 0 | 0 | 0 | 0 | 1 | 0 | 0 | 1 | hsa-miR-622 | -0.01 | N/A | Sites in UTR |

|          |              |                                                                            |   |   |   |   |   |   |   |   |             |         |     |              |
|----------|--------------|----------------------------------------------------------------------------|---|---|---|---|---|---|---|---|-------------|---------|-----|--------------|
| FNDC5    | NM_001171940 | fibronectin type III domain containing 5                                   | 0 | 0 | 0 | 0 | 1 | 0 | 0 | 1 | hsa-miR-622 | -0.01   | N/A | Sites in UTR |
| TP53INP2 | NM_021202    | tumor protein p53 inducible nuclear protein 2                              | 0 | 0 | 0 | 0 | 1 | 0 | 0 | 1 | hsa-miR-622 | > -0.01 | N/A | Sites in UTR |
| VPS13C   | NM_001018088 | vacuolar protein sorting 13 homolog C ( <i>S. cerevisiae</i> )             | 0 | 0 | 0 | 0 | 1 | 0 | 0 | 1 | hsa-miR-622 | > -0.01 | N/A | Sites in UTR |
| FAM199X  | NM_207318    | family with sequence similarity 199, X-linked                              | 0 | 0 | 0 | 0 | 1 | 0 | 0 | 1 | hsa-miR-622 | > -0.01 | N/A | Sites in UTR |
| ADCY1    | NM_021116    | adenylate cyclase 1 (brain)                                                | 0 | 0 | 0 | 0 | 1 | 0 | 0 | 1 | hsa-miR-622 | > -0.01 | N/A | Sites in UTR |
| AK2      | NM_001199199 | adenylate kinase 2                                                         | 0 | 0 | 0 | 0 | 1 | 0 | 0 | 1 | hsa-miR-622 | > -0.01 | N/A | Sites in UTR |
| AK4      | NM_001005353 | adenylate kinase 4                                                         | 0 | 0 | 0 | 0 | 1 | 0 | 0 | 1 | hsa-miR-622 | > -0.01 | N/A | Sites in UTR |
| BDNF     | NM_001143805 | brain-derived neurotrophic factor                                          | 0 | 0 | 0 | 0 | 1 | 0 | 0 | 1 | hsa-miR-622 | > -0.01 | N/A | Sites in UTR |
| RUNX1T1  | NM_001198625 | runt-related transcription factor 1; translocated to, 1 (cyclin D-related) | 1 | 0 | 0 | 1 | 0 | 0 | 0 | 0 | hsa-miR-622 | > -0.01 | N/A | Sites in UTR |
| CEBPG    | NM_001806    | CCAAT/enhancer binding protein (C/EBP), gamma                              | 0 | 0 | 0 | 0 | 1 | 0 | 0 | 1 | hsa-miR-622 | > -0.01 | N/A | Sites in UTR |
| COX15    | NM_004376    | COX15 homolog, cytochrome c oxidase assembly protein (yeast)               | 0 | 0 | 0 | 0 | 1 | 0 | 0 | 1 | hsa-miR-622 | > -0.01 | N/A | Sites in UTR |
| CREBBP   | NM_001079846 | CREB binding protein                                                       | 0 | 0 | 0 | 0 | 1 | 0 | 0 | 1 | hsa-miR-622 | > -0.01 | N/A | Sites in UTR |
| DBT      | NM_001918    | dihydroipoamide branched chain transacylase E2                             | 0 | 0 | 0 | 0 | 2 | 0 | 0 | 2 | hsa-miR-622 | > -0.01 | N/A | Sites in UTR |
| DUSP3    | NM_004090    | dual specificity phosphatase 3                                             | 0 | 0 | 0 | 0 | 1 | 0 | 0 | 1 | hsa-miR-622 | > -0.01 | N/A | Sites in UTR |
| E2F3     | NM_001949    | E2F transcription factor 3                                                 | 0 | 0 | 0 | 0 | 1 | 0 | 0 | 1 | hsa-miR-622 | > -0.01 | N/A | Sites in UTR |
| EMP2     | NM_001424    | epithelial membrane protein 2                                              | 0 | 0 | 0 | 0 | 1 | 0 | 0 | 1 | hsa-miR-622 | > -0.01 | N/A | Sites in UTR |
| ENSA     | NM_207043    | endosulfine alpha                                                          | 0 | 0 | 0 | 0 | 1 | 0 | 0 | 1 | hsa-miR-622 | > -0.01 | N/A | Sites in UTR |
| EPB41L1  | NM_012156    | erythrocyte membrane protein band 4.1-like 1                               | 0 | 0 | 0 | 0 | 1 | 0 | 0 | 1 | hsa-miR-622 | > -0.01 | N/A | Sites in UTR |

|          |              |                                                                                                     |   |   |   |   |   |   |   |   |             |         |     |              |
|----------|--------------|-----------------------------------------------------------------------------------------------------|---|---|---|---|---|---|---|---|-------------|---------|-----|--------------|
| ETV1     | NM_001163147 | ets variant 1                                                                                       | 0 | 0 | 0 | 0 | 1 | 0 | 0 | 1 | hsa-miR-622 | > -0.01 | N/A | Sites in UTR |
| NR5A2    | NM_003822    | nuclear receptor subfamily 5, group A, member 2                                                     | 0 | 0 | 0 | 0 | 1 | 0 | 0 | 1 | hsa-miR-622 | > -0.01 | N/A | Sites in UTR |
| GABRA4   | NM_000809    | gamma-aminobutyric acid (GABA) A receptor, alpha 4                                                  | 0 | 0 | 0 | 0 | 1 | 0 | 0 | 1 | hsa-miR-622 | > -0.01 | N/A | Sites in UTR |
| B4GALT1  | NM_001497    | UDP-Gal:betaGlcNAc beta 1,4- galactosyltransferase, polypeptide 1                                   | 0 | 0 | 0 | 0 | 1 | 0 | 0 | 1 | hsa-miR-622 | > -0.01 | N/A | Sites in UTR |
| ARHGAP35 | NM_004491    | Rho GTPase activating protein 35                                                                    | 0 | 0 | 0 | 0 | 1 | 0 | 0 | 1 | hsa-miR-622 | > -0.01 | N/A | Sites in UTR |
| HK2      | NM_000189    | hexokinase 2                                                                                        | 0 | 0 | 0 | 0 | 1 | 0 | 0 | 1 | hsa-miR-622 | > -0.01 | N/A | Sites in UTR |
| HNF4G    | NM_004133    | hepatocyte nuclear factor 4, gamma                                                                  | 0 | 0 | 0 | 0 | 1 | 0 | 0 | 1 | hsa-miR-622 | > -0.01 | N/A | Sites in UTR |
| HNRNPU   | NM_004501    | heterogeneous nuclear ribonucleoprotein U (scaffold attachment factor A)                            | 0 | 0 | 0 | 0 | 1 | 0 | 0 | 1 | hsa-miR-622 | > -0.01 | N/A | Sites in UTR |
| IGF1R    | NM_000875    | insulin-like growth factor 1 receptor                                                               | 0 | 0 | 0 | 0 | 1 | 0 | 0 | 1 | hsa-miR-622 | > -0.01 | N/A | Sites in UTR |
| IVD      | NM_001159508 | isovaleryl-CoA dehydrogenase                                                                        | 0 | 0 | 0 | 0 | 1 | 0 | 0 | 1 | hsa-miR-622 | > -0.01 | N/A | Sites in UTR |
| KCNA1    | NM_000217    | potassium voltage-gated channel, shaker-related subfamily, member 1 (episodic ataxia with myokymia) | 0 | 0 | 0 | 0 | 1 | 0 | 0 | 1 | hsa-miR-622 | > -0.01 | N/A | Sites in UTR |
| KCNQ3    | NM_001204824 | potassium voltage-gated channel, KQT-like subfamily, member 3                                       | 0 | 0 | 0 | 0 | 1 | 0 | 0 | 1 | hsa-miR-622 | > -0.01 | N/A | Sites in UTR |
| KCNS1    | NM_002251    | potassium voltage-gated channel, delayed-rectifier, subfamily S, member 1                           | 0 | 0 | 0 | 0 | 1 | 0 | 0 | 1 | hsa-miR-622 | > -0.01 | N/A | Sites in UTR |
| LEP      | NM_000230    | leptin                                                                                              | 1 | 0 | 0 | 1 | 0 | 0 | 0 | 0 | hsa-miR-622 | > -0.01 | N/A | Sites in UTR |
| LPP      | NM_001167671 | LIM domain containing preferred translocation partner in lipoma                                     | 1 | 0 | 0 | 1 | 0 | 0 | 0 | 0 | hsa-miR-622 | > -0.01 | N/A | Sites in UTR |
| LRP6     | NM_002336    | low density lipoprotein receptor-related protein 6                                                  | 0 | 0 | 0 | 0 | 1 | 0 | 0 | 1 | hsa-miR-622 | > -0.01 | N/A | Sites in UTR |
| SMAD3    | NM_001145102 | SMAD family member 3                                                                                | 0 | 0 | 0 | 0 | 1 | 0 | 0 | 1 | hsa-miR-622 | > -0.01 | N/A | Sites in UTR |
| MAP1B    | NM_005909    | microtubule-associated protein 1B                                                                   | 0 | 0 | 0 | 0 | 1 | 0 | 0 | 1 | hsa-miR-622 | > -0.01 | N/A | Sites in UTR |

|        |              |                                                                                       |   |   |   |   |   |   |   |   |             |         |     |              |
|--------|--------------|---------------------------------------------------------------------------------------|---|---|---|---|---|---|---|---|-------------|---------|-----|--------------|
| MGAT3  | NM_001098270 | mannosyl (beta-1,4-)-glycoprotein beta-1,4-N-acetylglucosaminyltransferase            | 0 | 0 | 0 | 0 | 1 | 0 | 0 | 1 | hsa-miR-622 | > -0.01 | N/A | Sites in UTR |
| MKI67  | NM_001145966 | antigen identified by monoclonal antibody Ki-67                                       | 0 | 0 | 0 | 0 | 1 | 0 | 0 | 1 | hsa-miR-622 | > -0.01 | N/A | Sites in UTR |
| MYO6   | NM_004999    | myosin VI                                                                             | 0 | 0 | 0 | 0 | 1 | 0 | 0 | 1 | hsa-miR-622 | > -0.01 | N/A | Sites in UTR |
| NFATC4 | NM_001136022 | nuclear factor of activated T-cells, cytoplasmic, calcineurin-dependent 4             | 0 | 0 | 0 | 0 | 1 | 0 | 0 | 1 | hsa-miR-622 | > -0.01 | N/A | Sites in UTR |
| NPR3   | NM_000908    | natriuretic peptide receptor C/guanylate cyclase C (atriuretic peptide receptor C)    | 0 | 0 | 0 | 0 | 1 | 0 | 0 | 1 | hsa-miR-622 | > -0.01 | N/A | Sites in UTR |
| PCDH7  | NM_001173523 | protocadherin 7                                                                       | 0 | 0 | 0 | 0 | 1 | 0 | 0 | 1 | hsa-miR-622 | > -0.01 | N/A | Sites in UTR |
| PDE4C  | NM_000923    | phosphodiesterase 4C, cAMP-specific                                                   | 0 | 0 | 0 | 0 | 1 | 0 | 0 | 1 | hsa-miR-622 | > -0.01 | N/A | Sites in UTR |
| PDGFRA | NM_006206    | platelet-derived growth factor receptor, alpha polypeptide                            | 0 | 0 | 0 | 0 | 1 | 0 | 0 | 1 | hsa-miR-622 | > -0.01 | N/A | Sites in UTR |
| PGR    | NM_000926    | progesterone receptor                                                                 | 0 | 0 | 0 | 0 | 1 | 0 | 0 | 1 | hsa-miR-622 | > -0.01 | N/A | Sites in UTR |
| PLCB3  | NM_000932    | phospholipase C, beta 3 (phosphatidylinositol-specific)                               | 0 | 0 | 0 | 0 | 1 | 0 | 0 | 1 | hsa-miR-622 | > -0.01 | N/A | Sites in UTR |
| POLH   | NM_006502    | polymerase (DNA directed), eta                                                        | 0 | 0 | 0 | 0 | 1 | 0 | 0 | 1 | hsa-miR-622 | > -0.01 | N/A | Sites in UTR |
| MAPK10 | NM_002753    | mitogen-activated protein kinase 10                                                   | 0 | 0 | 0 | 0 | 1 | 0 | 0 | 1 | hsa-miR-622 | > -0.01 | N/A | Sites in UTR |
| PTGER3 | NM_198715    | prostaglandin E receptor 3 (subtype EP3)                                              | 0 | 0 | 0 | 0 | 1 | 0 | 0 | 1 | hsa-miR-622 | > -0.01 | N/A | Sites in UTR |
| PTGS1  | NM_000962    | prostaglandin-endoperoxide synthase 1 (prostaglandin G/H synthase and cyclooxygenase) | 0 | 0 | 0 | 0 | 1 | 0 | 0 | 1 | hsa-miR-622 | > -0.01 | N/A | Sites in UTR |
| RORA   | NM_002943    | RAR-related orphan receptor A                                                         | 0 | 0 | 0 | 0 | 1 | 0 | 0 | 1 | hsa-miR-622 | > -0.01 | N/A | Sites in UTR |
| RPL27A | NM_000990    | ribosomal protein L27a                                                                | 0 | 0 | 0 | 0 | 1 | 0 | 0 | 1 | hsa-miR-622 | > -0.01 | N/A | Sites in UTR |
| SC5DL  | NM_001024956 | sterol-C5-desaturase (ERG3 delta-5-desaturase homolog, S. cerevisiae)-like            | 0 | 0 | 0 | 0 | 1 | 0 | 0 | 1 | hsa-miR-622 | > -0.01 | N/A | Sites in UTR |
| ATXN7  | NM_000333    | ataxin 7                                                                              | 0 | 0 | 0 | 0 | 1 | 0 | 0 | 1 | hsa-miR-622 | > -0.01 | N/A | Sites in UTR |

|         |              |                                                                                                           |   |   |   |   |   |   |   |   |             |         |     |              |
|---------|--------------|-----------------------------------------------------------------------------------------------------------|---|---|---|---|---|---|---|---|-------------|---------|-----|--------------|
| SOX12   | NM_006943    | SRY (sex determining region Y)-box 12                                                                     | 0 | 0 | 0 | 0 | 1 | 0 | 0 | 1 | hsa-miR-622 | > -0.01 | N/A | Sites in UTR |
| SP1     | NM_003109    | Sp1 transcription factor                                                                                  | 1 | 0 | 0 | 1 | 0 | 0 | 0 | 0 | hsa-miR-622 | > -0.01 | N/A | Sites in UTR |
| SPN     | NM_001030288 | sialophorin                                                                                               | 0 | 0 | 0 | 0 | 1 | 0 | 0 | 1 | hsa-miR-622 | > -0.01 | N/A | Sites in UTR |
| MED22   | NM_181491    | mediator complex subunit 22                                                                               | 0 | 0 | 0 | 0 | 1 | 0 | 0 | 1 | hsa-miR-622 | > -0.01 | N/A | Sites in UTR |
| TFDP2   | NM_001178138 | transcription factor Dp-2 (E2F dimerization partner 2)                                                    | 0 | 0 | 0 | 0 | 1 | 0 | 0 | 1 | hsa-miR-622 | > -0.01 | N/A | Sites in UTR |
| NR2C2   | NM_003298    | nuclear receptor subfamily 2, group C, member 2                                                           | 0 | 0 | 0 | 0 | 1 | 0 | 0 | 1 | hsa-miR-622 | > -0.01 | N/A | Sites in UTR |
| UMPS    | NM_000373    | uridine monophosphate synthetase                                                                          | 0 | 0 | 0 | 0 | 1 | 0 | 0 | 1 | hsa-miR-622 | > -0.01 | N/A | Sites in UTR |
| UQCRB   | NM_001199975 | ubiquinol-cytochrome c reductase binding protein                                                          | 0 | 0 | 0 | 0 | 1 | 0 | 0 | 1 | hsa-miR-622 | > -0.01 | N/A | Sites in UTR |
| ZFX     | NM_001178084 | zinc finger protein, X-linked                                                                             | 0 | 0 | 0 | 0 | 1 | 0 | 0 | 1 | hsa-miR-622 | > -0.01 | N/A | Sites in UTR |
| EVI5    | NM_005665    | ecotropic viral integration site 5                                                                        | 0 | 0 | 0 | 0 | 1 | 0 | 0 | 1 | hsa-miR-622 | > -0.01 | N/A | Sites in UTR |
| ST8SIA4 | NM_005668    | ST8 alpha-N-acetyl-neuraminide alpha-2,8-sialyltransferase 4                                              | 0 | 0 | 0 | 0 | 1 | 0 | 0 | 1 | hsa-miR-622 | > -0.01 | N/A | Sites in UTR |
| BRAP    | NM_006768    | BRCA1 associated protein                                                                                  | 0 | 0 | 0 | 0 | 1 | 0 | 0 | 1 | hsa-miR-622 | > -0.01 | N/A | Sites in UTR |
| FZD4    | NM_012193    | frizzled family receptor 4                                                                                | 0 | 0 | 0 | 0 | 1 | 0 | 0 | 1 | hsa-miR-622 | > -0.01 | N/A | Sites in UTR |
| PPFIA4  | NM_015053    | protein tyrosine phosphatase, receptor type, f polypeptide (PTPRF), interacting protein (liprin), alpha 4 | 0 | 0 | 0 | 0 | 1 | 0 | 0 | 1 | hsa-miR-622 | > -0.01 | N/A | Sites in UTR |
| GAS7    | NM_001130831 | growth arrest-specific 7                                                                                  | 0 | 0 | 0 | 0 | 1 | 0 | 0 | 1 | hsa-miR-622 | > -0.01 | N/A | Sites in UTR |
| TNKS    | NM_003747    | tankyrase, TRF1-interacting ankyrin-related ADP-ribose polymerase                                         | 0 | 0 | 0 | 0 | 1 | 0 | 0 | 1 | hsa-miR-622 | > -0.01 | N/A | Sites in UTR |
| CACNA1I | NM_001003406 | calcium channel, voltage-dependent, T type, alpha 1I subunit                                              | 0 | 0 | 0 | 0 | 1 | 0 | 0 | 1 | hsa-miR-622 | > -0.01 | N/A | Sites in UTR |
| SEC22C  | NM_032970    | SEC22 vesicle trafficking protein homolog C (S. cerevisiae)                                               | 0 | 0 | 0 | 0 | 1 | 0 | 0 | 1 | hsa-miR-622 | > -0.01 | N/A | Sites in UTR |

|          |              |                                                                            |   |   |   |   |   |   |   |   |             |         |     |              |
|----------|--------------|----------------------------------------------------------------------------|---|---|---|---|---|---|---|---|-------------|---------|-----|--------------|
| XPR1     | NM_001135669 | xenotropic and polytropic retrovirus receptor 1                            | 0 | 0 | 0 | 0 | 1 | 0 | 0 | 1 | hsa-miR-622 | > -0.01 | N/A | Sites in UTR |
| STK17B   | NM_004226    | serine/threonine kinase 17b                                                | 0 | 0 | 0 | 0 | 1 | 0 | 0 | 1 | hsa-miR-622 | > -0.01 | N/A | Sites in UTR |
| H6PD     | NM_004285    | hexose-6-phosphate dehydrogenase (glucose 1-dehydrogenase)                 | 0 | 0 | 0 | 0 | 1 | 0 | 0 | 1 | hsa-miR-622 | > -0.01 | N/A | Sites in UTR |
| HS2ST1   | NM_012262    | heparan sulfate 2-O-sulfotransferase 1                                     | 0 | 0 | 0 | 0 | 1 | 0 | 0 | 1 | hsa-miR-622 | > -0.01 | N/A | Sites in UTR |
| FAM53B   | NM_014661    | family with sequence similarity 53, member B                               | 0 | 0 | 0 | 0 | 1 | 0 | 0 | 1 | hsa-miR-622 | > -0.01 | N/A | Sites in UTR |
| EDEM1    | NM_014674    | ER degradation enhancer, mannosidase alpha-like 1                          | 0 | 0 | 0 | 0 | 1 | 0 | 0 | 1 | hsa-miR-622 | > -0.01 | N/A | Sites in UTR |
| ULK2     | NM_014683    | unc-51-like kinase 2 (C. elegans)                                          | 0 | 0 | 0 | 0 | 1 | 0 | 0 | 1 | hsa-miR-622 | > -0.01 | N/A | Sites in UTR |
| FAM131B  | NM_001031690 | family with sequence similarity 131, member B                              | 0 | 0 | 0 | 0 | 1 | 0 | 0 | 1 | hsa-miR-622 | > -0.01 | N/A | Sites in UTR |
| UTP14C   | NM_021645    | UTP14, U3 small nucleolar ribonucleoprotein, homolog C (yeast)             | 0 | 0 | 0 | 0 | 1 | 0 | 0 | 1 | hsa-miR-622 | > -0.01 | N/A | Sites in UTR |
| MLEC     | NM_014730    | malectin                                                                   | 0 | 0 | 0 | 0 | 1 | 0 | 0 | 1 | hsa-miR-622 | > -0.01 | N/A | Sites in UTR |
| ATG13    | NM_001142673 | ATG13 autophagy related 13 homolog (S. cerevisiae)                         | 0 | 0 | 0 | 0 | 1 | 0 | 0 | 1 | hsa-miR-622 | > -0.01 | N/A | Sites in UTR |
| RNF144A  | NM_014746    | ring finger protein 144A                                                   | 0 | 0 | 0 | 0 | 1 | 0 | 0 | 1 | hsa-miR-622 | > -0.01 | N/A | Sites in UTR |
| PLEKHM1  | NM_014798    | pleckstrin homology domain containing, family M (with RUN domain) member 1 | 0 | 0 | 0 | 0 | 1 | 0 | 0 | 1 | hsa-miR-622 | > -0.01 | N/A | Sites in UTR |
| EPM2AIP1 | NM_014805    | EPM2A (laforin) interacting protein 1                                      | 0 | 0 | 0 | 0 | 1 | 0 | 0 | 1 | hsa-miR-622 | > -0.01 | N/A | Sites in UTR |
| PIGK     | NM_005482    | phosphatidylinositol glycan anchor biosynthesis, class K                   | 0 | 0 | 0 | 0 | 1 | 0 | 0 | 1 | hsa-miR-622 | > -0.01 | N/A | Sites in UTR |
| APC2     | NM_005883    | adenomatosis polyposis coli 2                                              | 0 | 0 | 0 | 0 | 1 | 0 | 0 | 1 | hsa-miR-622 | > -0.01 | N/A | Sites in UTR |
| TLR6     | NM_006068    | toll-like receptor 6                                                       | 0 | 0 | 0 | 0 | 1 | 0 | 0 | 1 | hsa-miR-622 | > -0.01 | N/A | Sites in UTR |
| SPON1    | NM_006108    | spondin 1, extracellular matrix protein                                    | 0 | 0 | 0 | 0 | 1 | 0 | 0 | 1 | hsa-miR-622 | > -0.01 | N/A | Sites in UTR |



|         |              |                                                                                                |   |   |   |   |   |   |   |   |             |         |     |              |
|---------|--------------|------------------------------------------------------------------------------------------------|---|---|---|---|---|---|---|---|-------------|---------|-----|--------------|
| CRTAP   | NM_006371    | cartilage associated protein                                                                   | 0 | 0 | 0 | 0 | 1 | 0 | 0 | 1 | hsa-miR-622 | > -0.01 | N/A | Sites in UTR |
| TGOLN2  | NM_001206840 | trans-golgi network protein 2                                                                  | 0 | 0 | 0 | 0 | 1 | 0 | 0 | 1 | hsa-miR-622 | > -0.01 | N/A | Sites in UTR |
| EXOC5   | NM_006544    | exocyst complex component 5                                                                    | 0 | 0 | 0 | 0 | 1 | 0 | 0 | 1 | hsa-miR-622 | > -0.01 | N/A | Sites in UTR |
| PNMA2   | NM_007257    | paraneoplastic antigen MA2                                                                     | 0 | 0 | 0 | 0 | 1 | 0 | 0 | 1 | hsa-miR-622 | > -0.01 | N/A | Sites in UTR |
| ZBTB6   | NM_006626    | zinc finger and BTB domain containing 6                                                        | 0 | 0 | 0 | 0 | 1 | 0 | 0 | 1 | hsa-miR-622 | > -0.01 | N/A | Sites in UTR |
| PDE10A  | NM_001130690 | phosphodiesterase 10A                                                                          | 0 | 0 | 0 | 0 | 1 | 0 | 0 | 1 | hsa-miR-622 | > -0.01 | N/A | Sites in UTR |
| FGL2    | NM_006682    | fibrinogen-like 2                                                                              | 0 | 0 | 0 | 0 | 1 | 0 | 0 | 1 | hsa-miR-622 | > -0.01 | N/A | Sites in UTR |
| PTPRT   | NM_007050    | protein tyrosine phosphatase, receptor type, T                                                 | 0 | 0 | 0 | 0 | 1 | 0 | 0 | 1 | hsa-miR-622 | > -0.01 | N/A | Sites in UTR |
| GALNT6  | NM_007210    | UDP-N-acetyl-alpha-D-galactosamine:polypeptide N-acetylgalactosaminyltransferase 6 (GalNAc-T6) | 0 | 0 | 0 | 0 | 1 | 0 | 0 | 1 | hsa-miR-622 | > -0.01 | N/A | Sites in UTR |
| AAK1    | NM_014911    | AP2 associated kinase 1                                                                        | 0 | 0 | 0 | 0 | 1 | 0 | 0 | 1 | hsa-miR-622 | > -0.01 | N/A | Sites in UTR |
| ATG14   | NM_014924    | ATG14 autophagy related 14 homolog ( <i>S. cerevisiae</i> )                                    | 0 | 0 | 0 | 0 | 1 | 0 | 0 | 1 | hsa-miR-622 | > -0.01 | N/A | Sites in UTR |
| ELL2    | NM_012081    | elongation factor, RNA polymerase II, 2                                                        | 0 | 0 | 0 | 0 | 1 | 0 | 0 | 1 | hsa-miR-622 | > -0.01 | N/A | Sites in UTR |
| NT5C2   | NM_001134373 | 5'-nucleotidase, cytosolic II                                                                  | 0 | 0 | 0 | 0 | 1 | 0 | 0 | 1 | hsa-miR-622 | > -0.01 | N/A | Sites in UTR |
| KLHDC10 | NM_014997    | kelch domain containing 10                                                                     | 0 | 0 | 0 | 0 | 1 | 0 | 0 | 1 | hsa-miR-622 | > -0.01 | N/A | Sites in UTR |
| ZNF609  | NM_015042    | zinc finger protein 609                                                                        | 0 | 0 | 0 | 0 | 1 | 0 | 0 | 1 | hsa-miR-622 | > -0.01 | N/A | Sites in UTR |
| CDK19   | NM_015076    | cyclin-dependent kinase 19                                                                     | 0 | 0 | 0 | 0 | 1 | 0 | 0 | 1 | hsa-miR-622 | > -0.01 | N/A | Sites in UTR |
| NFASC   | NM_001005388 | neurofascin                                                                                    | 0 | 0 | 0 | 0 | 1 | 0 | 0 | 1 | hsa-miR-622 | > -0.01 | N/A | Sites in UTR |
| HIC2    | NM_015094    | hypermethylated in cancer 2                                                                    | 0 | 0 | 0 | 0 | 1 | 0 | 0 | 1 | hsa-miR-622 | > -0.01 | N/A | Sites in UTR |

|          |              |                                                                                  |   |   |   |   |   |   |   |   |             |         |     |              |
|----------|--------------|----------------------------------------------------------------------------------|---|---|---|---|---|---|---|---|-------------|---------|-----|--------------|
| LPIN1    | NM_145693    | lipin 1                                                                          | 0 | 0 | 0 | 0 | 1 | 0 | 0 | 1 | hsa-miR-622 | > -0.01 | N/A | Sites in UTR |
| LARP4B   | NM_015155    | La ribonucleoprotein domain family, member 4B                                    | 0 | 0 | 0 | 0 | 1 | 0 | 0 | 1 | hsa-miR-622 | > -0.01 | N/A | Sites in UTR |
| TRIM2    | NM_001130067 | tripartite motif containing 2                                                    | 0 | 0 | 0 | 0 | 1 | 0 | 0 | 1 | hsa-miR-622 | > -0.01 | N/A | Sites in UTR |
| TTC28    | NM_001145418 | tetratricopeptide repeat domain 28                                               | 0 | 0 | 0 | 0 | 1 | 0 | 0 | 1 | hsa-miR-622 | > -0.01 | N/A | Sites in UTR |
| KIAA1045 | NM_015297    | KIAA1045                                                                         | 0 | 0 | 0 | 0 | 1 | 0 | 0 | 1 | hsa-miR-622 | > -0.01 | N/A | Sites in UTR |
| AHCYL2   | NM_001130720 | adenosylhomocysteinase-like 2                                                    | 0 | 0 | 0 | 0 | 1 | 0 | 0 | 1 | hsa-miR-622 | > -0.01 | N/A | Sites in UTR |
| SLC7A8   | NM_012244    | solute carrier family 7 (amino acid transporter light chain, L system), member 8 | 0 | 0 | 0 | 0 | 1 | 0 | 0 | 1 | hsa-miR-622 | > -0.01 | N/A | Sites in UTR |
| CARHSP1  | NM_001042476 | calcium regulated heat stable protein 1, 24kDa                                   | 0 | 0 | 0 | 0 | 1 | 0 | 0 | 1 | hsa-miR-622 | > -0.01 | N/A | Sites in UTR |
| KPNA6    | NM_012316    | karyopherin alpha 6 (importin alpha 7)                                           | 0 | 0 | 0 | 0 | 1 | 0 | 0 | 1 | hsa-miR-622 | > -0.01 | N/A | Sites in UTR |
| C3orf17  | NM_015412    | chromosome 3 open reading frame 17                                               | 0 | 0 | 0 | 0 | 1 | 0 | 0 | 1 | hsa-miR-622 | > -0.01 | N/A | Sites in UTR |
| NSL1     | NM_001042549 | NSL1, MIND kinetochore complex component, homolog (S. cerevisiae)                | 0 | 0 | 0 | 0 | 1 | 0 | 0 | 1 | hsa-miR-622 | > -0.01 | N/A | Sites in UTR |
| CNNM1    | NM_020348    | cyclin M1                                                                        | 0 | 0 | 0 | 0 | 1 | 0 | 0 | 1 | hsa-miR-622 | > -0.01 | N/A | Sites in UTR |
| AP3M1    | NM_012095    | adaptor-related protein complex 3, mu 1 subunit                                  | 0 | 0 | 0 | 0 | 1 | 0 | 0 | 1 | hsa-miR-622 | > -0.01 | N/A | Sites in UTR |
| PDE7B    | NM_018945    | phosphodiesterase 7B                                                             | 0 | 0 | 0 | 0 | 1 | 0 | 0 | 1 | hsa-miR-622 | > -0.01 | N/A | Sites in UTR |
| SLCO3A1  | NM_013272    | solute carrier organic anion transporter family, member 3A1                      | 0 | 0 | 0 | 0 | 1 | 0 | 0 | 1 | hsa-miR-622 | > -0.01 | N/A | Sites in UTR |
| TMOD3    | NM_014547    | tropomodulin 3 (ubiquitous)                                                      | 0 | 0 | 0 | 0 | 1 | 0 | 0 | 1 | hsa-miR-622 | > -0.01 | N/A | Sites in UTR |
| SLC39A3  | NM_213568    | solute carrier family 39 (zinc transporter), member 3                            | 0 | 0 | 0 | 0 | 1 | 0 | 0 | 1 | hsa-miR-622 | > -0.01 | N/A | Sites in UTR |
| NOX4     | NM_001143836 | NADPH oxidase 4                                                                  | 0 | 0 | 0 | 0 | 1 | 0 | 0 | 1 | hsa-miR-622 | > -0.01 | N/A | Sites in UTR |

|          |              |                                                                                                 |   |   |   |   |   |   |   |   |             |         |     |              |
|----------|--------------|-------------------------------------------------------------------------------------------------|---|---|---|---|---|---|---|---|-------------|---------|-----|--------------|
| MYEF2    | NM_016132    | myelin expression factor 2                                                                      | 0 | 0 | 0 | 0 | 1 | 0 | 0 | 1 | hsa-miR-622 | > -0.01 | N/A | Sites in UTR |
| ZDHHC9   | NM_001008222 | zinc finger, DHHC-type containing 9                                                             | 0 | 0 | 0 | 0 | 1 | 0 | 0 | 1 | hsa-miR-622 | > -0.01 | N/A | Sites in UTR |
| PHF21A   | NM_001101802 | PHD finger protein 21A                                                                          | 0 | 0 | 0 | 0 | 1 | 0 | 0 | 1 | hsa-miR-622 | > -0.01 | N/A | Sites in UTR |
| CHIC1    | NM_001039840 | cysteine-rich hydrophobic domain 1                                                              | 0 | 0 | 0 | 0 | 1 | 0 | 0 | 1 | hsa-miR-622 | > -0.01 | N/A | Sites in UTR |
| SHC3     | NM_016848    | SHC (Src homology 2 domain containing) transforming protein 3                                   | 0 | 0 | 0 | 0 | 1 | 0 | 0 | 1 | hsa-miR-622 | > -0.01 | N/A | Sites in UTR |
| KCNK10   | NM_021161    | potassium channel, subfamily K, member 10                                                       | 0 | 0 | 0 | 0 | 1 | 0 | 0 | 1 | hsa-miR-622 | > -0.01 | N/A | Sites in UTR |
| TMEM106B | NM_001134232 | transmembrane protein 106B                                                                      | 0 | 0 | 0 | 0 | 1 | 0 | 0 | 1 | hsa-miR-622 | > -0.01 | N/A | Sites in UTR |
| RSBN1    | NM_018364    | round spermatid basic protein 1                                                                 | 0 | 0 | 0 | 0 | 1 | 0 | 0 | 1 | hsa-miR-622 | > -0.01 | N/A | Sites in UTR |
| SMU1     | NM_018225    | smu-1 suppressor of mec-8 and unc-52 homolog (C. elegans)                                       | 0 | 0 | 0 | 0 | 1 | 0 | 0 | 1 | hsa-miR-622 | > -0.01 | N/A | Sites in UTR |
| VPS53    | NM_001128159 | vacuolar protein sorting 53 homolog (S. cerevisiae)                                             | 0 | 0 | 0 | 0 | 1 | 0 | 0 | 1 | hsa-miR-622 | > -0.01 | N/A | Sites in UTR |
| AGPAT5   | NM_018361    | 1-acylglycerol-3-phosphate O-acyltransferase 5 (lysophosphatidic acid acyltransferase, epsilon) | 0 | 0 | 0 | 0 | 1 | 0 | 0 | 1 | hsa-miR-622 | > -0.01 | N/A | Sites in UTR |
| LIN7C    | NM_018362    | lin-7 homolog C (C. elegans)                                                                    | 0 | 0 | 0 | 0 | 1 | 0 | 0 | 1 | hsa-miR-622 | > -0.01 | N/A | Sites in UTR |
| SYNJ2BP  | NM_018373    | synaptojanin 2 binding protein                                                                  | 0 | 0 | 0 | 0 | 1 | 0 | 0 | 1 | hsa-miR-622 | > -0.01 | N/A | Sites in UTR |
| MED29    | NM_017592    | mediator complex subunit 29                                                                     | 0 | 0 | 0 | 0 | 1 | 0 | 0 | 1 | hsa-miR-622 | > -0.01 | N/A | Sites in UTR |
| TMEM127  | NM_001193304 | transmembrane protein 127                                                                       | 0 | 0 | 0 | 0 | 1 | 0 | 0 | 1 | hsa-miR-622 | > -0.01 | N/A | Sites in UTR |
| PARVA    | NM_018222    | parvin, alpha                                                                                   | 0 | 0 | 0 | 0 | 1 | 0 | 0 | 1 | hsa-miR-622 | > -0.01 | N/A | Sites in UTR |
| PAG1     | NM_018440    | phosphoprotein associated with glycosphingolipid microdomains 1                                 | 0 | 0 | 0 | 0 | 1 | 0 | 0 | 1 | hsa-miR-622 | > -0.01 | N/A | Sites in UTR |
| C1orf183 | NM_019099    | chromosome 1 open reading frame 183                                                             | 0 | 0 | 0 | 0 | 1 | 0 | 0 | 1 | hsa-miR-622 | > -0.01 | N/A | Sites in UTR |

|          |              |                                                                     |   |   |   |   |   |   |   |   |             |         |     |              |
|----------|--------------|---------------------------------------------------------------------|---|---|---|---|---|---|---|---|-------------|---------|-----|--------------|
| UGGT1    | NM_020120    | UDP-glucose glycoprotein glucosyltransferase 1                      | 0 | 0 | 0 | 0 | 1 | 0 | 0 | 1 | hsa-miR-622 | > -0.01 | N/A | Sites in UTR |
| TWSG1    | NM_020648    | twisted gastrulation homolog 1 (Drosophila)                         | 0 | 0 | 0 | 0 | 1 | 0 | 0 | 1 | hsa-miR-622 | > -0.01 | N/A | Sites in UTR |
| C15orf17 | NM_020447    | chromosome 15 open reading frame 17                                 | 0 | 0 | 0 | 0 | 1 | 0 | 0 | 1 | hsa-miR-622 | > -0.01 | N/A | Sites in UTR |
| NIPAL3   | NM_020448    | NIPA-like domain containing 3                                       | 0 | 0 | 0 | 0 | 1 | 0 | 0 | 1 | hsa-miR-622 | > -0.01 | N/A | Sites in UTR |
| KIAA1143 | NM_020696    | KIAA1143                                                            | 0 | 0 | 0 | 0 | 1 | 0 | 0 | 1 | hsa-miR-622 | > -0.01 | N/A | Sites in UTR |
| SLC12A5  | NM_001134771 | solute carrier family 12 (potassium/chloride transporter), member 5 | 1 | 0 | 0 | 1 | 0 | 0 | 0 | 0 | hsa-miR-622 | > -0.01 | N/A | Sites in UTR |
| CNOT6    | NM_015455    | CCR4-NOT transcription complex, subunit 6                           | 0 | 0 | 0 | 0 | 1 | 0 | 0 | 1 | hsa-miR-622 | > -0.01 | N/A | Sites in UTR |
| RPTOR    | NM_001163034 | regulatory associated protein of MTOR, complex 1                    | 0 | 0 | 0 | 0 | 1 | 0 | 0 | 1 | hsa-miR-622 | > -0.01 | N/A | Sites in UTR |
| TRMT5    | NM_020810    | TRM5 tRNA methyltransferase 5 homolog (S. cerevisiae)               | 0 | 0 | 0 | 0 | 1 | 0 | 0 | 1 | hsa-miR-622 | > -0.01 | N/A | Sites in UTR |
| WDFY1    | NM_020830    | WD repeat and FYVE domain containing 1                              | 0 | 0 | 0 | 0 | 1 | 0 | 0 | 1 | hsa-miR-622 | > -0.01 | N/A | Sites in UTR |
| DIP2B    | NM_173602    | DIP2 disco-interacting protein 2 homolog B (Drosophila)             | 0 | 0 | 0 | 0 | 1 | 0 | 0 | 1 | hsa-miR-622 | > -0.01 | N/A | Sites in UTR |
| RANBP10  | NM_020850    | RAN binding protein 10                                              | 0 | 0 | 0 | 0 | 1 | 0 | 0 | 1 | hsa-miR-622 | > -0.01 | N/A | Sites in UTR |
| KIAA1609 | NM_020947    | KIAA1609                                                            | 0 | 0 | 0 | 0 | 1 | 0 | 0 | 1 | hsa-miR-622 | > -0.01 | N/A | Sites in UTR |
| GNB4     | NM_021629    | guanine nucleotide binding protein (G protein), beta polypeptide 4  | 0 | 0 | 0 | 0 | 1 | 0 | 0 | 1 | hsa-miR-622 | > -0.01 | N/A | Sites in UTR |
| LMBR1    | NM_022458    | limb region 1 homolog (mouse)                                       | 0 | 0 | 0 | 0 | 1 | 0 | 0 | 1 | hsa-miR-622 | > -0.01 | N/A | Sites in UTR |
| ZFP106   | NM_022473    | zinc finger protein 106 homolog (mouse)                             | 0 | 0 | 0 | 0 | 1 | 0 | 0 | 1 | hsa-miR-622 | > -0.01 | N/A | Sites in UTR |
| CSMD1    | NM_033225    | CUB and Sushi multiple domains 1                                    | 0 | 0 | 0 | 0 | 1 | 0 | 0 | 1 | hsa-miR-622 | > -0.01 | N/A | Sites in UTR |
| NUCKS1   | NM_022731    | nuclear casein kinase and cyclin-dependent kinase substrate 1       | 0 | 0 | 0 | 0 | 1 | 0 | 0 | 1 | hsa-miR-622 | > -0.01 | N/A | Sites in UTR |

|          |              |                                                         |   |   |   |   |   |   |   |   |             |         |     |              |
|----------|--------------|---------------------------------------------------------|---|---|---|---|---|---|---|---|-------------|---------|-----|--------------|
| UBE2Z    | NM_023079    | ubiquitin-conjugating enzyme E2Z                        | 0 | 0 | 0 | 0 | 1 | 0 | 0 | 1 | hsa-miR-622 | > -0.01 | N/A | Sites in UTR |
| KCTD15   | NM_024076    | potassium channel tetramerisation domain containing 15  | 0 | 0 | 0 | 0 | 1 | 0 | 0 | 1 | hsa-miR-622 | > -0.01 | N/A | Sites in UTR |
| TMEM185B | NM_024121    | transmembrane protein 185B                              | 0 | 0 | 0 | 0 | 1 | 0 | 0 | 1 | hsa-miR-622 | > -0.01 | N/A | Sites in UTR |
| CENPO    | NM_001199803 | centromere protein O                                    | 0 | 0 | 0 | 0 | 1 | 0 | 0 | 1 | hsa-miR-622 | > -0.01 | N/A | Sites in UTR |
| ATP13A3  | NM_024524    | ATPase type 13A3                                        | 0 | 0 | 0 | 0 | 1 | 0 | 0 | 1 | hsa-miR-622 | > -0.01 | N/A | Sites in UTR |
| METTL8   | NM_024770    | methyltransferase like 8                                | 0 | 0 | 0 | 0 | 1 | 0 | 0 | 1 | hsa-miR-622 | > -0.01 | N/A | Sites in UTR |
| CYBRD1   | NM_001127383 | cytochrome b reductase 1                                | 0 | 0 | 0 | 0 | 1 | 0 | 0 | 1 | hsa-miR-622 | > -0.01 | N/A | Sites in UTR |
| WDR82    | NM_025222    | WD repeat domain 82                                     | 0 | 0 | 0 | 0 | 1 | 0 | 0 | 1 | hsa-miR-622 | > -0.01 | N/A | Sites in UTR |
| AKNA     | NM_030767    | AT-hook transcription factor                            | 0 | 0 | 0 | 0 | 1 | 0 | 0 | 1 | hsa-miR-622 | > -0.01 | N/A | Sites in UTR |
| APOL6    | NM_030641    | apolipoprotein L, 6                                     | 0 | 0 | 0 | 0 | 1 | 0 | 0 | 1 | hsa-miR-622 | > -0.01 | N/A | Sites in UTR |
| AIF1L    | NM_001185095 | allograft inflammatory factor 1-like                    | 0 | 0 | 0 | 0 | 1 | 0 | 0 | 1 | hsa-miR-622 | > -0.01 | N/A | Sites in UTR |
| DNAL1    | NM_001201366 | dynein, axonemal, light chain 1                         | 0 | 0 | 0 | 0 | 1 | 0 | 0 | 1 | hsa-miR-622 | > -0.01 | N/A | Sites in UTR |
| MARVELD1 | NM_031484    | MARVEL domain containing 1                              | 0 | 0 | 0 | 0 | 1 | 0 | 0 | 1 | hsa-miR-622 | > -0.01 | N/A | Sites in UTR |
| TMTC1    | NM_001193451 | transmembrane and tetratricopeptide repeat containing 1 | 0 | 0 | 0 | 0 | 1 | 0 | 0 | 1 | hsa-miR-622 | > -0.01 | N/A | Sites in UTR |
| KATNAL1  | NM_001014380 | katanin p60 subunit A-like 1                            | 0 | 0 | 0 | 0 | 1 | 0 | 0 | 1 | hsa-miR-622 | > -0.01 | N/A | Sites in UTR |
| DCTN5    | NM_001199743 | dynactin 5 (p25)                                        | 0 | 0 | 0 | 0 | 1 | 0 | 0 | 1 | hsa-miR-622 | > -0.01 | N/A | Sites in UTR |
| DIXDC1   | NM_001037954 | DIX domain containing 1                                 | 0 | 0 | 0 | 0 | 1 | 0 | 0 | 1 | hsa-miR-622 | > -0.01 | N/A | Sites in UTR |
| GTPBP10  | NM_001042717 | GTP-binding protein 10 (putative)                       | 0 | 0 | 0 | 0 | 1 | 0 | 0 | 1 | hsa-miR-622 | > -0.01 | N/A | Sites in UTR |

|         |              |                                                                                                  |   |   |   |   |   |   |   |   |             |         |     |              |
|---------|--------------|--------------------------------------------------------------------------------------------------|---|---|---|---|---|---|---|---|-------------|---------|-----|--------------|
| FCHSD1  | NM_033449    | FCH and double SH3 domains 1                                                                     | 0 | 0 | 0 | 0 | 1 | 0 | 0 | 1 | hsa-miR-622 | > -0.01 | N/A | Sites in UTR |
| FMNL3   | NM_175736    | formin-like 3                                                                                    | 0 | 0 | 0 | 0 | 1 | 0 | 0 | 1 | hsa-miR-622 | > -0.01 | N/A | Sites in UTR |
| SYT12   | NM_001177880 | synaptotagmin XII                                                                                | 0 | 0 | 0 | 0 | 1 | 0 | 0 | 1 | hsa-miR-622 | > -0.01 | N/A | Sites in UTR |
| GALNT13 | NM_052917    | UDP-N-acetyl-alpha-D-galactosamine:polypeptide N-acetylgalactosaminyltransferase 13 (GalNAc-T13) | 0 | 0 | 0 | 0 | 1 | 0 | 0 | 1 | hsa-miR-622 | > -0.01 | N/A | Sites in UTR |
| OSBPL6  | NM_001201480 | oxysterol binding protein-like 6                                                                 | 0 | 0 | 0 | 0 | 1 | 0 | 0 | 1 | hsa-miR-622 | > -0.01 | N/A | Sites in UTR |
| C1QTNF3 | NM_030945    | C1q and tumor necrosis factor related protein 3                                                  | 0 | 0 | 0 | 0 | 1 | 0 | 0 | 1 | hsa-miR-622 | > -0.01 | N/A | Sites in UTR |
| NUS1    | NM_138459    | nuclear undecaprenyl pyrophosphate synthase 1 homolog ( <i>S. cerevisiae</i> )                   | 0 | 0 | 0 | 0 | 1 | 0 | 0 | 1 | hsa-miR-622 | > -0.01 | N/A | Sites in UTR |
| GRIN3A  | NM_133445    | glutamate receptor, ionotropic, N-methyl-D-aspartate 3A                                          | 0 | 0 | 0 | 0 | 1 | 0 | 0 | 1 | hsa-miR-622 | > -0.01 | N/A | Sites in UTR |
| THEM4   | NM_053055    | thioesterase superfamily member 4                                                                | 0 | 0 | 0 | 0 | 1 | 0 | 0 | 1 | hsa-miR-622 | > -0.01 | N/A | Sites in UTR |
| RAB3IP  | NM_001024647 | RAB3A interacting protein (rabin3)                                                               | 0 | 0 | 0 | 0 | 1 | 0 | 0 | 1 | hsa-miR-622 | > -0.01 | N/A | Sites in UTR |
| GIPC3   | NM_133261    | GIPC PDZ domain containing family, member 3                                                      | 0 | 0 | 0 | 0 | 1 | 0 | 0 | 1 | hsa-miR-622 | > -0.01 | N/A | Sites in UTR |
| KLF17   | NM_173484    | Kruppel-like factor 17                                                                           | 0 | 0 | 0 | 0 | 1 | 0 | 0 | 1 | hsa-miR-622 | > -0.01 | N/A | Sites in UTR |
| UBE2QL1 | NM_001145161 | ubiquitin-conjugating enzyme E2Q family-like 1                                                   | 0 | 0 | 0 | 0 | 1 | 0 | 0 | 1 | hsa-miR-622 | > -0.01 | N/A | Sites in UTR |
| CD109   | NM_001159587 | CD109 molecule                                                                                   | 0 | 0 | 0 | 0 | 1 | 0 | 0 | 1 | hsa-miR-622 | > -0.01 | N/A | Sites in UTR |
| AGPAT6  | NM_178819    | 1-acylglycerol-3-phosphate O-acyltransferase 6 (lysophosphatidic acid acyltransferase, zeta)     | 0 | 0 | 0 | 0 | 1 | 0 | 0 | 1 | hsa-miR-622 | > -0.01 | N/A | Sites in UTR |
| ASB6    | NM_001202403 | ankyrin repeat and SOCS box containing 6                                                         | 0 | 0 | 0 | 0 | 1 | 0 | 0 | 1 | hsa-miR-622 | > -0.01 | N/A | Sites in UTR |
| DUSP19  | NM_001142314 | dual specificity phosphatase 19                                                                  | 0 | 0 | 0 | 0 | 1 | 0 | 0 | 1 | hsa-miR-622 | > -0.01 | N/A | Sites in UTR |
| CCBE1   | NM_133459    | collagen and calcium binding EGF domains 1                                                       | 0 | 0 | 0 | 0 | 1 | 0 | 0 | 1 | hsa-miR-622 | > -0.01 | N/A | Sites in UTR |

|          |              |                                                                      |   |   |   |   |   |   |   |   |             |         |     |              |
|----------|--------------|----------------------------------------------------------------------|---|---|---|---|---|---|---|---|-------------|---------|-----|--------------|
| ZNF578   | NM_001099694 | zinc finger protein 578                                              | 0 | 0 | 0 | 0 | 1 | 0 | 0 | 1 | hsa-miR-622 | > -0.01 | N/A | Sites in UTR |
| DIRAS1   | NM_145173    | DIRAS family, GTP-binding RAS-like 1                                 | 0 | 0 | 0 | 0 | 1 | 0 | 0 | 1 | hsa-miR-622 | > -0.01 | N/A | Sites in UTR |
| SYT6     | NM_205848    | synaptotagmin VI                                                     | 0 | 0 | 0 | 0 | 1 | 0 | 0 | 1 | hsa-miR-622 | > -0.01 | N/A | Sites in UTR |
| SMYD1    | NM_198274    | SET and MYND domain containing 1                                     | 0 | 0 | 0 | 0 | 1 | 0 | 0 | 1 | hsa-miR-622 | > -0.01 | N/A | Sites in UTR |
| FAM84A   | NM_145175    | family with sequence similarity 84, member A                         | 0 | 0 | 0 | 0 | 1 | 0 | 0 | 1 | hsa-miR-622 | > -0.01 | N/A | Sites in UTR |
| GPR155   | NM_001033045 | G protein-coupled receptor 155                                       | 0 | 0 | 0 | 0 | 1 | 0 | 0 | 1 | hsa-miR-622 | > -0.01 | N/A | Sites in UTR |
| CCDC50   | NM_174908    | coiled-coil domain containing 50                                     | 0 | 0 | 0 | 0 | 1 | 0 | 0 | 1 | hsa-miR-622 | > -0.01 | N/A | Sites in UTR |
| THAP6    | NM_144721    | THAP domain containing 6                                             | 0 | 0 | 0 | 0 | 1 | 0 | 0 | 1 | hsa-miR-622 | > -0.01 | N/A | Sites in UTR |
| SLC2A12  | NM_145176    | solute carrier family 2 (facilitated glucose transporter), member 12 | 0 | 0 | 0 | 0 | 1 | 0 | 0 | 1 | hsa-miR-622 | > -0.01 | N/A | Sites in UTR |
| TMEM229B | NM_182526    | transmembrane protein 229B                                           | 0 | 0 | 0 | 0 | 1 | 0 | 0 | 1 | hsa-miR-622 | > -0.01 | N/A | Sites in UTR |
| C18orf54 | NM_173529    | chromosome 18 open reading frame 54                                  | 0 | 0 | 0 | 0 | 1 | 0 | 0 | 1 | hsa-miR-622 | > -0.01 | N/A | Sites in UTR |
| DENND1B  | NM_001195215 | DENN/MADD domain containing 1B                                       | 0 | 0 | 0 | 0 | 1 | 0 | 0 | 1 | hsa-miR-622 | > -0.01 | N/A | Sites in UTR |
| PRICKLE2 | NM_198859    | prickle homolog 2 (Drosophila)                                       | 0 | 0 | 0 | 0 | 1 | 0 | 0 | 1 | hsa-miR-622 | > -0.01 | N/A | Sites in UTR |
| RASSF6   | NM_177532    | Ras association (RalGDS/AF-6) domain family member 6                 | 0 | 0 | 0 | 0 | 1 | 0 | 0 | 1 | hsa-miR-622 | > -0.01 | N/A | Sites in UTR |
| TMEM184A | NM_001097620 | transmembrane protein 184A                                           | 0 | 0 | 0 | 0 | 1 | 0 | 0 | 1 | hsa-miR-622 | > -0.01 | N/A | Sites in UTR |
| C9orf25  | NM_001184940 | chromosome 9 open reading frame 25                                   | 0 | 0 | 0 | 0 | 1 | 0 | 0 | 1 | hsa-miR-622 | > -0.01 | N/A | Sites in UTR |
| C3orf58  | NM_001134470 | chromosome 3 open reading frame 58                                   | 0 | 0 | 0 | 0 | 1 | 0 | 0 | 1 | hsa-miR-622 | > -0.01 | N/A | Sites in UTR |
| SENP5    | NM_152699    | SUMO1/sentrin specific peptidase 5                                   | 0 | 0 | 0 | 0 | 1 | 0 | 0 | 1 | hsa-miR-622 | > -0.01 | N/A | Sites in UTR |

|          |              |                                                  |   |   |   |   |   |   |   |   |             |         |     |              |
|----------|--------------|--------------------------------------------------|---|---|---|---|---|---|---|---|-------------|---------|-----|--------------|
| C11orf45 | NM_145013    | chromosome 11 open reading frame 45              | 0 | 0 | 0 | 0 | 1 | 0 | 0 | 1 | hsa-miR-622 | > -0.01 | N/A | Sites in UTR |
| NAPEPLD  | NM_001122838 | N-acyl phosphatidylethanolamine phospholipase D  | 0 | 0 | 0 | 0 | 1 | 0 | 0 | 1 | hsa-miR-622 | > -0.01 | N/A | Sites in UTR |
| MSRB3    | NM_001031679 | methionine sulfoxide reductase B3                | 0 | 0 | 0 | 0 | 1 | 0 | 0 | 1 | hsa-miR-622 | > -0.01 | N/A | Sites in UTR |
| NPNT     | NM_001033047 | nephronectin                                     | 0 | 0 | 0 | 0 | 1 | 0 | 0 | 1 | hsa-miR-622 | > -0.01 | N/A | Sites in UTR |
| C19orf54 | NM_198476    | chromosome 19 open reading frame 54              | 0 | 0 | 0 | 0 | 1 | 0 | 0 | 1 | hsa-miR-622 | > -0.01 | N/A | Sites in UTR |
| RABL3    | NM_173825    | RAB, member of RAS oncogene family-like 3        | 0 | 0 | 0 | 0 | 1 | 0 | 0 | 1 | hsa-miR-622 | > -0.01 | N/A | Sites in UTR |
| SH3RF3   | NM_001099289 | SH3 domain containing ring finger 3              | 0 | 0 | 0 | 0 | 1 | 0 | 0 | 1 | hsa-miR-622 | > -0.01 | N/A | Sites in UTR |
| ZNF829   | NM_001037232 | zinc finger protein 829                          | 0 | 0 | 0 | 0 | 1 | 0 | 0 | 1 | hsa-miR-622 | > -0.01 | N/A | Sites in UTR |
| ILDR2    | NM_199351    | immunoglobulin-like domain containing receptor 2 | 0 | 0 | 0 | 0 | 1 | 0 | 0 | 1 | hsa-miR-622 | > -0.01 | N/A | Sites in UTR |
| TLCD2    | NM_001164407 | TLC domain containing 2                          | 0 | 0 | 0 | 0 | 1 | 0 | 0 | 1 | hsa-miR-622 | > -0.01 | N/A | Sites in UTR |
| C6orf35  | NM_018452    | chromosome 6 open reading frame 35               | 0 | 0 | 0 | 0 | 1 | 0 | 0 | 1 | hsa-miR-622 | > -0.01 | N/A | Sites in UTR |
| ISPD     | NM_001101417 | isoprenoid synthase domain containing            | 0 | 0 | 0 | 0 | 1 | 0 | 0 | 1 | hsa-miR-622 | > -0.01 | N/A | Sites in UTR |
| ZBTB42   | NM_001137601 | zinc finger and BTB domain containing 42         | 0 | 0 | 0 | 0 | 1 | 0 | 0 | 1 | hsa-miR-622 | > -0.01 | N/A | Sites in UTR |
| KLHL21   | NM_014851    | kelch-like 21 (Drosophila)                       | 0 | 0 | 0 | 0 | 1 | 0 | 1 | 0 | hsa-miR-622 | > -0.02 | N/A | Sites in UTR |
| ABR      | NM_001092    | active BCR-related gene                          | 0 | 0 | 0 | 0 | 1 | 0 | 1 | 0 | hsa-miR-622 | > -0.02 | N/A | Sites in UTR |
| ADCY5    | NM_001199642 | adenylate cyclase 5                              | 0 | 0 | 0 | 0 | 1 | 0 | 1 | 0 | hsa-miR-622 | > -0.02 | N/A | Sites in UTR |
| AHR      | NM_001621    | aryl hydrocarbon receptor                        | 0 | 0 | 0 | 0 | 1 | 0 | 1 | 0 | hsa-miR-622 | > -0.02 | N/A | Sites in UTR |
| ARCN1    | NM_001142281 | archain 1                                        | 0 | 0 | 0 | 0 | 1 | 0 | 1 | 0 | hsa-miR-622 | > -0.02 | N/A | Sites in UTR |



|          |              |                                                                                                          |   |   |   |   |   |   |   |   |             |         |     |              |
|----------|--------------|----------------------------------------------------------------------------------------------------------|---|---|---|---|---|---|---|---|-------------|---------|-----|--------------|
| ATP6V1C1 | NM_001695    | ATPase, H+ transporting, lysosomal 42kDa, V1 subunit C1                                                  | 0 | 0 | 0 | 0 | 1 | 0 | 1 | 0 | hsa-miR-622 | > -0.02 | N/A | Sites in UTR |
| CACNA1C  | NM_000719    | calcium channel, voltage-dependent, L type, alpha 1C subunit                                             | 0 | 0 | 0 | 0 | 1 | 0 | 1 | 0 | hsa-miR-622 | > -0.02 | N/A | Sites in UTR |
| CAV3     | NM_033337    | caveolin 3                                                                                               | 0 | 0 | 0 | 0 | 1 | 0 | 1 | 0 | hsa-miR-622 | > -0.02 | N/A | Sites in UTR |
| CCND2    | NM_001759    | cyclin D2                                                                                                | 0 | 0 | 0 | 0 | 1 | 0 | 1 | 0 | hsa-miR-622 | > -0.02 | N/A | Sites in UTR |
| CDK6     | NM_001145306 | cyclin-dependent kinase 6                                                                                | 0 | 0 | 0 | 0 | 1 | 0 | 1 | 0 | hsa-miR-622 | > -0.02 | N/A | Sites in UTR |
| CFL2     | NM_021914    | cofilin 2 (muscle)                                                                                       | 0 | 0 | 0 | 0 | 1 | 0 | 1 | 0 | hsa-miR-622 | > -0.02 | N/A | Sites in UTR |
| CRY2     | NM_001127457 | cryptochrome 2 (photolyase-like)                                                                         | 0 | 0 | 0 | 0 | 1 | 0 | 1 | 0 | hsa-miR-622 | > -0.02 | N/A | Sites in UTR |
| DMWD     | NM_004943    | dystrophia myotonica, WD repeat containing                                                               | 0 | 0 | 0 | 0 | 1 | 0 | 1 | 0 | hsa-miR-622 | > -0.02 | N/A | Sites in UTR |
| DUSP4    | NM_001394    | dual specificity phosphatase 4                                                                           | 0 | 0 | 0 | 0 | 1 | 0 | 1 | 0 | hsa-miR-622 | > -0.02 | N/A | Sites in UTR |
| MEGF9    | NM_001080497 | multiple EGF-like-domains 9                                                                              | 0 | 0 | 0 | 0 | 1 | 0 | 1 | 0 | hsa-miR-622 | > -0.02 | N/A | Sites in UTR |
| ELN      | NM_000501    | elastin                                                                                                  | 0 | 0 | 0 | 0 | 1 | 0 | 1 | 0 | hsa-miR-622 | > -0.02 | N/A | Sites in UTR |
| MARK2    | NM_001039469 | MAP/microtubule affinity-regulating kinase 2                                                             | 0 | 0 | 0 | 0 | 1 | 0 | 1 | 0 | hsa-miR-622 | > -0.02 | N/A | Sites in UTR |
| FANCC    | NM_000136    | Fanconi anemia, complementation group C                                                                  | 0 | 0 | 0 | 0 | 1 | 0 | 1 | 0 | hsa-miR-622 | > -0.02 | N/A | Sites in UTR |
| FANCF    | NM_022725    | Fanconi anemia, complementation group F                                                                  | 0 | 0 | 0 | 0 | 1 | 0 | 1 | 0 | hsa-miR-622 | > -0.02 | N/A | Sites in UTR |
| FBN1     | NM_000138    | fibrillin 1                                                                                              | 0 | 0 | 0 | 0 | 1 | 0 | 1 | 0 | hsa-miR-622 | > -0.02 | N/A | Sites in UTR |
| FECH     | NM_000140    | ferrochelatase                                                                                           | 0 | 0 | 0 | 0 | 1 | 0 | 1 | 0 | hsa-miR-622 | > -0.02 | N/A | Sites in UTR |
| FGF2     | NM_002006    | fibroblast growth factor 2 (basic)                                                                       | 0 | 0 | 0 | 0 | 1 | 0 | 1 | 0 | hsa-miR-622 | > -0.02 | N/A | Sites in UTR |
| FLT1     | NM_001159920 | fms-related tyrosine kinase 1 (vascular endothelial growth factor/vascular permeability factor receptor) | 0 | 0 | 0 | 0 | 1 | 0 | 1 | 0 | hsa-miR-622 | > -0.02 | N/A | Sites in UTR |

|       |              |                                                                                           |   |   |   |   |   |   |   |   |             |         |     |              |
|-------|--------------|-------------------------------------------------------------------------------------------|---|---|---|---|---|---|---|---|-------------|---------|-----|--------------|
| GFRA1 | NM_001145453 | GDNF family receptor alpha 1                                                              | 0 | 0 | 0 | 0 | 1 | 0 | 1 | 0 | hsa-miR-622 | > -0.02 | N/A | Sites in UTR |
| GNRHR | NM_000406    | gonadotropin-releasing hormone receptor                                                   | 0 | 0 | 0 | 0 | 1 | 0 | 1 | 0 | hsa-miR-622 | > -0.02 | N/A | Sites in UTR |
| GRIK3 | NM_000831    | glutamate receptor, ionotropic, kainate 3                                                 | 0 | 0 | 0 | 0 | 1 | 0 | 1 | 0 | hsa-miR-622 | > -0.02 | N/A | Sites in UTR |
| AGFG2 | NM_006076    | ArfGAP with FG repeats 2                                                                  | 0 | 0 | 0 | 0 | 1 | 0 | 1 | 0 | hsa-miR-622 | > -0.02 | N/A | Sites in UTR |
| HUS1  | NM_004507    | HUS1 checkpoint homolog ( <i>S. pombe</i> )                                               | 0 | 0 | 0 | 0 | 1 | 0 | 1 | 0 | hsa-miR-622 | > -0.02 | N/A | Sites in UTR |
| KCNC4 | NM_001039574 | potassium voltage-gated channel, Shaw-related subfamily, member 4                         | 0 | 0 | 0 | 0 | 1 | 0 | 1 | 0 | hsa-miR-622 | > -0.02 | N/A | Sites in UTR |
| KCNH1 | NM_002238    | potassium voltage-gated channel, subfamily H (eag-related), member 1                      | 0 | 0 | 0 | 0 | 1 | 0 | 1 | 0 | hsa-miR-622 | > -0.02 | N/A | Sites in UTR |
| KCNN1 | NM_002248    | potassium intermediate/small conductance calcium-activated channel, subfamily N, member 1 | 0 | 0 | 0 | 0 | 1 | 0 | 1 | 0 | hsa-miR-622 | > -0.02 | N/A | Sites in UTR |
| LOX   | NM_001178102 | lysyl oxidase                                                                             | 1 | 0 | 1 | 0 | 0 | 0 | 0 | 0 | hsa-miR-622 | > -0.02 | N/A | Sites in UTR |
| LSAMP | NM_002338    | limbic system-associated membrane protein                                                 | 0 | 0 | 0 | 0 | 1 | 0 | 1 | 0 | hsa-miR-622 | > -0.02 | N/A | Sites in UTR |
| AFF1  | NM_001166693 | AF4/FMR2 family, member 1                                                                 | 0 | 0 | 0 | 0 | 1 | 0 | 1 | 0 | hsa-miR-622 | > -0.02 | N/A | Sites in UTR |
| MPL   | NM_005373    | myeloproliferative leukemia virus oncogene                                                | 0 | 0 | 0 | 0 | 1 | 0 | 1 | 0 | hsa-miR-622 | > -0.02 | N/A | Sites in UTR |
| NCAM1 | NM_001076682 | neural cell adhesion molecule 1                                                           | 0 | 0 | 0 | 0 | 1 | 0 | 1 | 0 | hsa-miR-622 | > -0.02 | N/A | Sites in UTR |
| NFIX  | NM_002501    | nuclear factor I/X (CCAAT-binding transcription factor)                                   | 0 | 0 | 0 | 0 | 1 | 0 | 1 | 0 | hsa-miR-622 | > -0.02 | N/A | Sites in UTR |
| NMT1  | NM_021079    | N-myristoyltransferase 1                                                                  | 0 | 0 | 0 | 0 | 1 | 0 | 1 | 0 | hsa-miR-622 | > -0.02 | N/A | Sites in UTR |
| PAX6  | NM_000280    | paired box 6                                                                              | 0 | 0 | 0 | 0 | 1 | 0 | 1 | 0 | hsa-miR-622 | > -0.02 | N/A | Sites in UTR |
| PDE6A | NM_000440    | phosphodiesterase 6A, cGMP-specific, rod, alpha                                           | 0 | 0 | 0 | 0 | 1 | 0 | 1 | 0 | hsa-miR-622 | > -0.02 | N/A | Sites in UTR |
| PDK3  | NM_001142386 | pyruvate dehydrogenase kinase, isozyme 3                                                  | 0 | 0 | 0 | 0 | 1 | 0 | 1 | 0 | hsa-miR-622 | > -0.02 | N/A | Sites in UTR |

|          |              |                                                                                                    |   |   |   |   |   |   |   |   |             |         |     |              |
|----------|--------------|----------------------------------------------------------------------------------------------------|---|---|---|---|---|---|---|---|-------------|---------|-----|--------------|
| PLXNA2   | NM_025179    | plexin A2                                                                                          | 0 | 0 | 0 | 0 | 1 | 0 | 1 | 0 | hsa-miR-622 | > -0.02 | N/A | Sites in UTR |
| PVRL1    | NM_002855    | poliovirus receptor-related 1 (herpesvirus entry mediator C)                                       | 0 | 0 | 0 | 0 | 1 | 0 | 1 | 0 | hsa-miR-622 | > -0.02 | N/A | Sites in UTR |
| THRB     | NM_000461    | thyroid hormone receptor, beta (erythroblastic leukemia viral (v-erb-a) oncogene homolog 2, avian) | 0 | 0 | 0 | 0 | 1 | 0 | 1 | 0 | hsa-miR-622 | > -0.02 | N/A | Sites in UTR |
| FZD5     | NM_003468    | frizzled family receptor 5                                                                         | 0 | 0 | 0 | 0 | 1 | 0 | 1 | 0 | hsa-miR-622 | > -0.02 | N/A | Sites in UTR |
| CCDC6    | NM_005436    | coiled-coil domain containing 6                                                                    | 0 | 0 | 0 | 0 | 1 | 0 | 1 | 0 | hsa-miR-622 | > -0.02 | N/A | Sites in UTR |
| ST8SIA2  | NM_006011    | ST8 alpha-N-acetyl-neuraminide alpha-2,8-sialyltransferase 2                                       | 0 | 0 | 0 | 0 | 1 | 0 | 1 | 0 | hsa-miR-622 | > -0.02 | N/A | Sites in UTR |
| SNN      | NM_003498    | stannin                                                                                            | 0 | 0 | 0 | 0 | 1 | 0 | 1 | 0 | hsa-miR-622 | > -0.02 | N/A | Sites in UTR |
| PDXK     | NM_003681    | pyridoxal (pyridoxine, vitamin B6) kinase                                                          | 0 | 0 | 0 | 0 | 1 | 0 | 1 | 0 | hsa-miR-622 | > -0.02 | N/A | Sites in UTR |
| HS6ST1   | NM_004807    | heparan sulfate 6-O-sulfotransferase 1                                                             | 0 | 0 | 0 | 0 | 1 | 0 | 1 | 0 | hsa-miR-622 | > -0.02 | N/A | Sites in UTR |
| RAB36    | NM_004914    | RAB36, member RAS oncogene family                                                                  | 0 | 0 | 0 | 0 | 1 | 0 | 1 | 0 | hsa-miR-622 | > -0.02 | N/A | Sites in UTR |
| ZNF516   | NM_014643    | zinc finger protein 516                                                                            | 0 | 0 | 0 | 0 | 1 | 0 | 1 | 0 | hsa-miR-622 | > -0.02 | N/A | Sites in UTR |
| LPIN2    | NM_014646    | lipin 2                                                                                            | 0 | 0 | 0 | 0 | 1 | 0 | 1 | 0 | hsa-miR-622 | > -0.02 | N/A | Sites in UTR |
| LRRC14   | NM_014665    | leucine rich repeat containing 14                                                                  | 0 | 0 | 0 | 0 | 1 | 0 | 1 | 0 | hsa-miR-622 | > -0.02 | N/A | Sites in UTR |
| TRAM2    | NM_012288    | translocation associated membrane protein 2                                                        | 0 | 0 | 0 | 0 | 1 | 0 | 1 | 0 | hsa-miR-622 | > -0.02 | N/A | Sites in UTR |
| SNPH     | NM_014723    | syntaphilin                                                                                        | 0 | 0 | 0 | 0 | 1 | 0 | 1 | 0 | hsa-miR-622 | > -0.02 | N/A | Sites in UTR |
| KIAA0513 | NM_014732    | KIAA0513                                                                                           | 0 | 0 | 0 | 0 | 1 | 0 | 1 | 0 | hsa-miR-622 | > -0.02 | N/A | Sites in UTR |
| MATR3    | NM_001194954 | matrin 3                                                                                           | 0 | 0 | 0 | 0 | 1 | 0 | 1 | 0 | hsa-miR-622 | > -0.02 | N/A | Sites in UTR |
| SCRN1    | NM_001145513 | secernin 1                                                                                         | 0 | 0 | 0 | 0 | 1 | 0 | 1 | 0 | hsa-miR-622 | > -0.02 | N/A | Sites in UTR |

|          |              |                                                      |   |   |   |   |   |   |   |   |             |         |     |              |
|----------|--------------|------------------------------------------------------|---|---|---|---|---|---|---|---|-------------|---------|-----|--------------|
| DNAJC6   | NM_014787    | DnaJ (Hsp40) homolog, subfamily C, member 6          | 0 | 0 | 0 | 0 | 1 | 0 | 1 | 0 | hsa-miR-622 | > -0.02 | N/A | Sites in UTR |
| URB1     | NM_014825    | URB1 ribosome biogenesis 1 homolog (S. cerevisiae)   | 0 | 0 | 0 | 0 | 1 | 0 | 1 | 0 | hsa-miR-622 | > -0.02 | N/A | Sites in UTR |
| ZBTB39   | NM_014830    | zinc finger and BTB domain containing 39             | 0 | 0 | 0 | 0 | 1 | 0 | 1 | 0 | hsa-miR-622 | > -0.02 | N/A | Sites in UTR |
| SRGAP3   | NM_001033117 | SLIT-ROBO Rho GTPase activating protein 3            | 0 | 0 | 0 | 0 | 1 | 0 | 1 | 0 | hsa-miR-622 | > -0.02 | N/A | Sites in UTR |
| ATP9A    | NM_006045    | ATPase, class II, type 9A                            | 0 | 0 | 0 | 0 | 1 | 0 | 1 | 0 | hsa-miR-622 | > -0.02 | N/A | Sites in UTR |
| RASA4    | NM_001079877 | RAS p21 protein activator 4                          | 0 | 0 | 0 | 0 | 1 | 0 | 1 | 0 | hsa-miR-622 | > -0.02 | N/A | Sites in UTR |
| WASF2    | NM_001201404 | WAS protein family, member 2                         | 0 | 0 | 0 | 0 | 1 | 0 | 1 | 0 | hsa-miR-622 | > -0.02 | N/A | Sites in UTR |
| DCAF7    | NM_005828    | DDB1 and CUL4 associated factor 7                    | 0 | 0 | 0 | 0 | 1 | 0 | 1 | 0 | hsa-miR-622 | > -0.02 | N/A | Sites in UTR |
| 9-Sep    | NM_001113491 | septin 9                                             | 0 | 0 | 0 | 0 | 1 | 0 | 1 | 0 | hsa-miR-622 | > -0.02 | N/A | Sites in UTR |
| TSPAN9   | NM_001168320 | tetraspanin 9                                        | 0 | 0 | 0 | 0 | 1 | 0 | 1 | 0 | hsa-miR-622 | > -0.02 | N/A | Sites in UTR |
| FAM107A  | NM_001076778 | family with sequence similarity 107, member A        | 0 | 0 | 0 | 0 | 1 | 0 | 1 | 0 | hsa-miR-622 | > -0.02 | N/A | Sites in UTR |
| ATXN2L   | NM_007245    | ataxin 2-like                                        | 0 | 0 | 0 | 0 | 1 | 0 | 1 | 0 | hsa-miR-622 | > -0.02 | N/A | Sites in UTR |
| ANKRD6   | NM_001242809 | ankyrin repeat domain 6                              | 0 | 0 | 0 | 0 | 1 | 0 | 1 | 0 | hsa-miR-622 | > -0.02 | N/A | Sites in UTR |
| UBOX5    | NM_014948    | U-box domain containing 5                            | 0 | 0 | 0 | 0 | 1 | 0 | 1 | 0 | hsa-miR-622 | > -0.02 | N/A | Sites in UTR |
| EXPH5    | NM_015065    | exophilin 5                                          | 0 | 0 | 0 | 0 | 1 | 0 | 1 | 0 | hsa-miR-622 | > -0.02 | N/A | Sites in UTR |
| ARHGAP26 | NM_001135608 | Rho GTPase activating protein 26                     | 0 | 0 | 0 | 0 | 1 | 0 | 1 | 0 | hsa-miR-622 | > -0.02 | N/A | Sites in UTR |
| MCF2L2   | NM_015078    | MCF.2 cell line derived transforming sequence-like 2 | 0 | 0 | 0 | 0 | 1 | 0 | 1 | 0 | hsa-miR-622 | > -0.02 | N/A | Sites in UTR |
| GRAMD4   | NM_015124    | GRAM domain containing 4                             | 0 | 0 | 0 | 0 | 1 | 0 | 1 | 0 | hsa-miR-622 | > -0.02 | N/A | Sites in UTR |

|          |              |                                                                     |   |   |   |   |   |   |   |   |             |         |     |              |
|----------|--------------|---------------------------------------------------------------------|---|---|---|---|---|---|---|---|-------------|---------|-----|--------------|
| NCDN     | NM_001014839 | neurochondrin                                                       | 0 | 0 | 0 | 0 | 1 | 0 | 1 | 0 | hsa-miR-622 | > -0.02 | N/A | Sites in UTR |
| FBXO28   | NM_001136115 | F-box protein 28                                                    | 0 | 0 | 0 | 0 | 1 | 0 | 1 | 0 | hsa-miR-622 | > -0.02 | N/A | Sites in UTR |
| IQCE     | NM_001100390 | IQ motif containing E                                               | 0 | 0 | 0 | 0 | 1 | 0 | 1 | 0 | hsa-miR-622 | > -0.02 | N/A | Sites in UTR |
| DNAJC16  | NM_015291    | Dnaj (Hsp40) homolog, subfamily C, member 16                        | 0 | 0 | 0 | 0 | 1 | 0 | 1 | 0 | hsa-miR-622 | > -0.02 | N/A | Sites in UTR |
| HAUS5    | NM_015302    | HAUS augmin-like complex, subunit 5                                 | 0 | 0 | 0 | 0 | 1 | 0 | 1 | 0 | hsa-miR-622 | > -0.02 | N/A | Sites in UTR |
| PSD3     | NM_015310    | pleckstrin and Sec7 domain containing 3                             | 0 | 0 | 0 | 0 | 1 | 0 | 1 | 0 | hsa-miR-622 | > -0.02 | N/A | Sites in UTR |
| SPECC1L  | NM_001145468 | sperm antigen with calponin homology and coiled-coil domains 1-like | 0 | 0 | 0 | 0 | 1 | 0 | 1 | 0 | hsa-miR-622 | > -0.02 | N/A | Sites in UTR |
| TTC9     | NM_015351    | tetratricopeptide repeat domain 9                                   | 1 | 0 | 1 | 0 | 0 | 0 | 0 | 0 | hsa-miR-622 | > -0.02 | N/A | Sites in UTR |
| ZNF346   | NM_012279    | zinc finger protein 346                                             | 0 | 0 | 0 | 0 | 1 | 0 | 1 | 0 | hsa-miR-622 | > -0.02 | N/A | Sites in UTR |
| SPATS2L  | NM_001100422 | spermatogenesis associated, serine-rich 2-like                      | 0 | 0 | 0 | 0 | 1 | 0 | 1 | 0 | hsa-miR-622 | > -0.02 | N/A | Sites in UTR |
| C1orf144 | NM_001114600 | chromosome 1 open reading frame 144                                 | 0 | 0 | 0 | 0 | 1 | 0 | 1 | 0 | hsa-miR-622 | > -0.02 | N/A | Sites in UTR |
| CCDC69   | NM_015621    | coiled-coil domain containing 69                                    | 0 | 0 | 0 | 0 | 1 | 0 | 1 | 0 | hsa-miR-622 | > -0.02 | N/A | Sites in UTR |
| CNNM3    | NM_017623    | cyclin M3                                                           | 0 | 0 | 0 | 0 | 1 | 0 | 1 | 0 | hsa-miR-622 | > -0.02 | N/A | Sites in UTR |
| AFF4     | NM_014423    | AF4/FMR2 family, member 4                                           | 0 | 0 | 0 | 0 | 1 | 0 | 1 | 0 | hsa-miR-622 | > -0.02 | N/A | Sites in UTR |
| NDOR1    | NM_001144026 | NADPH dependent diflavin oxidoreductase 1                           | 0 | 0 | 0 | 0 | 1 | 0 | 1 | 0 | hsa-miR-622 | > -0.02 | N/A | Sites in UTR |
| GPKOW    | NM_015698    | G patch domain and KOW motifs                                       | 0 | 0 | 0 | 0 | 1 | 0 | 1 | 0 | hsa-miR-622 | > -0.02 | N/A | Sites in UTR |
| HIPK2    | NM_001113239 | homeodomain interacting protein kinase 2                            | 0 | 0 | 0 | 0 | 1 | 0 | 1 | 0 | hsa-miR-622 | > -0.02 | N/A | Sites in UTR |
| SOX8     | NM_014587    | SRY (sex determining region Y)-box 8                                | 0 | 0 | 0 | 0 | 1 | 0 | 1 | 0 | hsa-miR-622 | > -0.02 | N/A | Sites in UTR |

|          |              |                                                               |   |   |   |   |   |   |   |   |             |         |     |              |
|----------|--------------|---------------------------------------------------------------|---|---|---|---|---|---|---|---|-------------|---------|-----|--------------|
| IL21R    | NM_021798    | interleukin 21 receptor                                       | 0 | 0 | 0 | 0 | 1 | 0 | 1 | 0 | hsa-miR-622 | > -0.02 | N/A | Sites in UTR |
| SEPSECS  | NM_016955    | Sep (O-phosphoserine) tRNA:Sec (selenocysteine) tRNA synthase | 0 | 0 | 0 | 0 | 1 | 0 | 1 | 0 | hsa-miR-622 | > -0.02 | N/A | Sites in UTR |
| GDE1     | NM_016641    | glycerophosphodiester phosphodiesterase 1                     | 0 | 0 | 0 | 0 | 1 | 0 | 1 | 0 | hsa-miR-622 | > -0.02 | N/A | Sites in UTR |
| KLF13    | NM_015995    | Kruppel-like factor 13                                        | 0 | 0 | 0 | 0 | 1 | 0 | 1 | 0 | hsa-miR-622 | > -0.02 | N/A | Sites in UTR |
| C21orf91 | NM_001100420 | chromosome 21 open reading frame 91                           | 0 | 0 | 0 | 0 | 1 | 0 | 1 | 0 | hsa-miR-622 | > -0.02 | N/A | Sites in UTR |
| WNT4     | NM_030761    | wingless-type MMTV integration site family, member 4          | 0 | 0 | 0 | 0 | 1 | 0 | 1 | 0 | hsa-miR-622 | > -0.02 | N/A | Sites in UTR |
| TBC1D13  | NM_018201    | TBC1 domain family, member 13                                 | 0 | 0 | 0 | 0 | 1 | 0 | 1 | 0 | hsa-miR-622 | > -0.02 | N/A | Sites in UTR |
| CRLS1    | NM_001127458 | cardiolipin synthase 1                                        | 0 | 0 | 0 | 0 | 1 | 0 | 1 | 0 | hsa-miR-622 | > -0.02 | N/A | Sites in UTR |
| BNC2     | NM_017637    | basonuclin 2                                                  | 0 | 0 | 0 | 0 | 1 | 0 | 1 | 0 | hsa-miR-622 | > -0.02 | N/A | Sites in UTR |
| ALKBH5   | NM_017758    | alkB, alkylation repair homolog 5 (E. coli)                   | 0 | 0 | 0 | 0 | 1 | 0 | 1 | 0 | hsa-miR-622 | > -0.02 | N/A | Sites in UTR |
| PTCD3    | NM_017952    | Pentatricopeptide repeat domain 3                             | 0 | 0 | 0 | 0 | 1 | 0 | 1 | 0 | hsa-miR-622 | > -0.02 | N/A | Sites in UTR |
| PPP1R9A  | NM_001166160 | protein phosphatase 1, regulatory (inhibitor) subunit 9A      | 0 | 0 | 0 | 0 | 1 | 0 | 1 | 0 | hsa-miR-622 | > -0.02 | N/A | Sites in UTR |
| MCTP2    | NM_001159643 | multiple C2 domains, transmembrane 2                          | 0 | 0 | 0 | 0 | 1 | 0 | 1 | 0 | hsa-miR-622 | > -0.02 | N/A | Sites in UTR |
| SPPL2B   | NM_001077238 | signal peptide peptidase-like 2B                              | 0 | 0 | 0 | 0 | 1 | 0 | 1 | 0 | hsa-miR-622 | > -0.02 | N/A | Sites in UTR |
| RALGAPB  | NM_020336    | Ral GTPase activating protein, beta subunit (non-catalytic)   | 0 | 0 | 0 | 0 | 1 | 0 | 1 | 0 | hsa-miR-622 | > -0.02 | N/A | Sites in UTR |
| DOLPP1   | NM_001135917 | dolichyl pyrophosphate phosphatase 1                          | 0 | 0 | 0 | 0 | 1 | 0 | 1 | 0 | hsa-miR-622 | > -0.02 | N/A | Sites in UTR |
| KIAA1244 | NM_020340    | KIAA1244                                                      | 0 | 0 | 0 | 0 | 1 | 0 | 1 | 0 | hsa-miR-622 | > -0.02 | N/A | Sites in UTR |
| KIAA1462 | NM_020848    | KIAA1462                                                      | 0 | 0 | 0 | 0 | 1 | 0 | 1 | 0 | hsa-miR-622 | > -0.02 | N/A | Sites in UTR |

|          |              |                                                            |   |   |   |   |   |   |   |   |             |         |     |              |
|----------|--------------|------------------------------------------------------------|---|---|---|---|---|---|---|---|-------------|---------|-----|--------------|
| GPR107   | NM_001136557 | G protein-coupled receptor 107                             | 0 | 0 | 0 | 0 | 1 | 0 | 1 | 0 | hsa-miR-622 | > -0.02 | N/A | Sites in UTR |
| HRH4     | NM_001143828 | histamine receptor H4                                      | 0 | 0 | 0 | 0 | 1 | 0 | 1 | 0 | hsa-miR-622 | > -0.02 | N/A | Sites in UTR |
| NAPB     | NM_022080    | N-ethylmaleimide-sensitive factor attachment protein, beta | 0 | 0 | 0 | 0 | 1 | 0 | 1 | 0 | hsa-miR-622 | > -0.02 | N/A | Sites in UTR |
| CCDC90A  | NM_001031713 | coiled-coil domain containing 90A                          | 0 | 0 | 0 | 0 | 1 | 0 | 1 | 0 | hsa-miR-622 | > -0.02 | N/A | Sites in UTR |
| NSD1     | NM_022455    | nuclear receptor binding SET domain protein 1              | 0 | 0 | 0 | 0 | 1 | 0 | 1 | 0 | hsa-miR-622 | > -0.02 | N/A | Sites in UTR |
| CREB3L2  | NM_194071    | cAMP responsive element binding protein 3-like 2           | 0 | 0 | 0 | 0 | 1 | 0 | 1 | 0 | hsa-miR-622 | > -0.02 | N/A | Sites in UTR |
| C6orf106 | NM_022758    | chromosome 6 open reading frame 106                        | 0 | 0 | 0 | 0 | 1 | 0 | 1 | 0 | hsa-miR-622 | > -0.02 | N/A | Sites in UTR |
| CERK     | NM_022766    | ceramide kinase                                            | 0 | 0 | 0 | 0 | 1 | 0 | 1 | 0 | hsa-miR-622 | > -0.02 | N/A | Sites in UTR |
| WNK3     | NM_001002838 | WNK lysine deficient protein kinase 3                      | 0 | 0 | 0 | 0 | 1 | 0 | 1 | 0 | hsa-miR-622 | > -0.02 | N/A | Sites in UTR |
| OTUB2    | NM_023112    | OTU domain, ubiquitin aldehyde binding 2                   | 0 | 0 | 0 | 0 | 1 | 0 | 1 | 0 | hsa-miR-622 | > -0.02 | N/A | Sites in UTR |
| NAA16    | NM_024561    | N(alpha)-acetyltransferase 16, NatA auxiliary subunit      | 0 | 0 | 0 | 0 | 1 | 0 | 1 | 0 | hsa-miR-622 | > -0.02 | N/A | Sites in UTR |
| SRD5A3   | NM_024592    | steroid 5 alpha-reductase 3                                | 0 | 0 | 0 | 0 | 1 | 0 | 1 | 0 | hsa-miR-622 | > -0.02 | N/A | Sites in UTR |
| C16orf57 | NM_001204911 | chromosome 16 open reading frame 57                        | 0 | 0 | 0 | 0 | 1 | 0 | 1 | 0 | hsa-miR-622 | > -0.02 | N/A | Sites in UTR |
| NOL9     | NM_024654    | nucleolar protein 9                                        | 0 | 0 | 0 | 0 | 1 | 0 | 1 | 0 | hsa-miR-622 | > -0.02 | N/A | Sites in UTR |
| CLMN     | NM_024734    | calmin (calponin-like, transmembrane)                      | 0 | 0 | 0 | 0 | 1 | 0 | 1 | 0 | hsa-miR-622 | > -0.02 | N/A | Sites in UTR |
| RBFA     | NM_001171967 | ribosome binding factor A (putative)                       | 0 | 0 | 0 | 0 | 1 | 0 | 1 | 0 | hsa-miR-622 | > -0.02 | N/A | Sites in UTR |
| ERMP1    | NM_024896    | endoplasmic reticulum metalloproteinase 1                  | 0 | 0 | 0 | 0 | 1 | 0 | 1 | 0 | hsa-miR-622 | > -0.02 | N/A | Sites in UTR |
| PQLC1    | NM_001146343 | PQ loop repeat containing 1                                | 0 | 0 | 0 | 0 | 1 | 0 | 1 | 0 | hsa-miR-622 | > -0.02 | N/A | Sites in UTR |

|          |              |                                                                                              |   |   |   |   |   |   |   |   |             |         |     |              |
|----------|--------------|----------------------------------------------------------------------------------------------|---|---|---|---|---|---|---|---|-------------|---------|-----|--------------|
| CEP63    | NM_001042383 | centrosomal protein 63kDa                                                                    | 0 | 0 | 0 | 0 | 1 | 0 | 1 | 0 | hsa-miR-622 | > -0.02 | N/A | Sites in UTR |
| DNAJC5   | NM_025219    | DnaJ (Hsp40) homolog, subfamily C, member 5                                                  | 0 | 0 | 0 | 0 | 1 | 0 | 1 | 0 | hsa-miR-622 | > -0.02 | N/A | Sites in UTR |
| ITIH5    | NM_030569    | inter-alpha (globulin) inhibitor H5                                                          | 0 | 0 | 0 | 0 | 1 | 0 | 1 | 0 | hsa-miR-622 | > -0.02 | N/A | Sites in UTR |
| C22orf13 | NM_031444    | chromosome 22 open reading frame 13                                                          | 0 | 0 | 0 | 0 | 1 | 0 | 1 | 0 | hsa-miR-622 | > -0.02 | N/A | Sites in UTR |
| SETDB2   | NM_001160308 | SET domain, bifurcated 2                                                                     | 0 | 0 | 0 | 0 | 1 | 0 | 1 | 0 | hsa-miR-622 | > -0.02 | N/A | Sites in UTR |
| NCALD    | NM_001040624 | neurocalcin delta                                                                            | 0 | 0 | 0 | 0 | 1 | 0 | 1 | 0 | hsa-miR-622 | > -0.02 | N/A | Sites in UTR |
| ZIC4     | NM_001168378 | Zic family member 4                                                                          | 0 | 0 | 0 | 0 | 1 | 0 | 1 | 0 | hsa-miR-622 | > -0.02 | N/A | Sites in UTR |
| LDOC1L   | NM_032287    | leucine zipper, down-regulated in cancer 1-like                                              | 0 | 0 | 0 | 0 | 1 | 0 | 1 | 0 | hsa-miR-622 | > -0.02 | N/A | Sites in UTR |
| SRRM4    | NM_194286    | serine/arginine repetitive matrix 4                                                          | 0 | 0 | 0 | 0 | 1 | 0 | 1 | 0 | hsa-miR-622 | > -0.02 | N/A | Sites in UTR |
| PLEKHA8  | NM_001197026 | pleckstrin homology domain containing, family A (phosphoinositide binding specific) member 8 | 0 | 0 | 0 | 0 | 1 | 0 | 1 | 0 | hsa-miR-622 | > -0.02 | N/A | Sites in UTR |
| LMNB2    | NM_032737    | lamin B2                                                                                     | 0 | 0 | 0 | 0 | 1 | 0 | 1 | 0 | hsa-miR-622 | > -0.02 | N/A | Sites in UTR |
| PPP1R15B | NM_032833    | protein phosphatase 1, regulatory (inhibitor) subunit 15B                                    | 0 | 0 | 0 | 0 | 1 | 0 | 1 | 0 | hsa-miR-622 | > -0.02 | N/A | Sites in UTR |
| FBXL20   | NM_001184906 | F-box and leucine-rich repeat protein 20                                                     | 0 | 0 | 0 | 0 | 1 | 0 | 1 | 0 | hsa-miR-622 | > -0.02 | N/A | Sites in UTR |
| ARHGAP19 | NM_001204300 | Rho GTPase activating protein 19                                                             | 0 | 0 | 0 | 0 | 1 | 0 | 1 | 0 | hsa-miR-622 | > -0.02 | N/A | Sites in UTR |
| SNX29    | NM_001080530 | sorting nexin 29                                                                             | 0 | 0 | 0 | 0 | 1 | 0 | 1 | 0 | hsa-miR-622 | > -0.02 | N/A | Sites in UTR |
| MTDH     | NM_178812    | metadherin                                                                                   | 1 | 0 | 1 | 0 | 0 | 0 | 0 | 0 | hsa-miR-622 | > -0.02 | N/A | Sites in UTR |
| NACC1    | NM_052876    | nucleus accumbens associated 1, BEN and BTB (POZ) domain containing                          | 0 | 0 | 0 | 0 | 1 | 0 | 1 | 0 | hsa-miR-622 | > -0.02 | N/A | Sites in UTR |
| MYSM1    | NM_001085487 | Myb-like, SWIRM and MPN domains 1                                                            | 0 | 0 | 0 | 0 | 1 | 0 | 1 | 0 | hsa-miR-622 | > -0.02 | N/A | Sites in UTR |



|          |              |                                                                         |   |   |   |   |   |   |   |   |             |         |     |              |
|----------|--------------|-------------------------------------------------------------------------|---|---|---|---|---|---|---|---|-------------|---------|-----|--------------|
| LRRCS8   | NM_001099678 | leucine rich repeat containing 58                                       | 0 | 0 | 0 | 0 | 1 | 0 | 1 | 0 | hsa-miR-622 | > -0.02 | N/A | Sites in UTR |
| FOXP4    | NM_001012426 | forkhead box P4                                                         | 0 | 0 | 0 | 0 | 1 | 0 | 1 | 0 | hsa-miR-622 | > -0.02 | N/A | Sites in UTR |
| RFFL     | NM_001017368 | ring finger and FYVE-like domain containing 1                           | 0 | 0 | 0 | 0 | 1 | 0 | 1 | 0 | hsa-miR-622 | > -0.02 | N/A | Sites in UTR |
| ZNF488   | NM_153034    | zinc finger protein 488                                                 | 0 | 0 | 0 | 0 | 1 | 0 | 1 | 0 | hsa-miR-622 | > -0.02 | N/A | Sites in UTR |
| SFXN2    | NM_178858    | sideroflexin 2                                                          | 0 | 0 | 0 | 0 | 1 | 0 | 1 | 0 | hsa-miR-622 | > -0.02 | N/A | Sites in UTR |
| SLC24A4  | NM_153646    | solute carrier family 24 (sodium/potassium/calcium exchanger), member 4 | 0 | 0 | 0 | 0 | 1 | 0 | 1 | 0 | hsa-miR-622 | > -0.02 | N/A | Sites in UTR |
| C18orf19 | NM_001098801 | chromosome 18 open reading frame 19                                     | 0 | 0 | 0 | 0 | 1 | 0 | 1 | 0 | hsa-miR-622 | > -0.02 | N/A | Sites in UTR |
| MOBK12A  | NM_130807    | MOB1, Mps One Binder kinase activator-like 2A (yeast)                   | 0 | 0 | 0 | 0 | 1 | 0 | 1 | 0 | hsa-miR-622 | > -0.02 | N/A | Sites in UTR |
| SYT2     | NM_001136504 | synaptotagmin II                                                        | 0 | 0 | 0 | 0 | 1 | 0 | 1 | 0 | hsa-miR-622 | > -0.02 | N/A | Sites in UTR |
| ZNF362   | NM_152493    | zinc finger protein 362                                                 | 0 | 0 | 0 | 0 | 1 | 0 | 1 | 0 | hsa-miR-622 | > -0.02 | N/A | Sites in UTR |
| METTL21A | NM_001127395 | methyltransferase like 21A                                              | 0 | 0 | 0 | 0 | 1 | 0 | 1 | 0 | hsa-miR-622 | > -0.02 | N/A | Sites in UTR |
| DTX3L    | NM_138287    | deltex 3-like (Drosophila)                                              | 0 | 0 | 0 | 0 | 1 | 0 | 1 | 0 | hsa-miR-622 | > -0.02 | N/A | Sites in UTR |
| GBP6     | NM_198460    | guanylate binding protein family, member 6                              | 0 | 0 | 0 | 0 | 1 | 0 | 1 | 0 | hsa-miR-622 | > -0.02 | N/A | Sites in UTR |
| ADAMTS17 | NM_139057    | ADAM metalloproteinase with thrombospondin type 1 motif, 17             | 0 | 0 | 0 | 0 | 1 | 0 | 1 | 0 | hsa-miR-622 | > -0.02 | N/A | Sites in UTR |
| DNAJC18  | NM_152686    | Dnaj (Hsp40) homolog, subfamily C, member 18                            | 0 | 0 | 0 | 0 | 1 | 0 | 1 | 0 | hsa-miR-622 | > -0.02 | N/A | Sites in UTR |
| ZCCHC24  | NM_153367    | zinc finger, CCHC domain containing 24                                  | 0 | 0 | 0 | 0 | 1 | 0 | 1 | 0 | hsa-miR-622 | > -0.02 | N/A | Sites in UTR |
| FOXP1    | NM_001037165 | forkhead box K1                                                         | 0 | 0 | 0 | 0 | 1 | 0 | 1 | 0 | hsa-miR-622 | > -0.02 | N/A | Sites in UTR |
| C7orf41  | NM_152793    | chromosome 7 open reading frame 41                                      | 0 | 0 | 0 | 0 | 1 | 0 | 1 | 0 | hsa-miR-622 | > -0.02 | N/A | Sites in UTR |

|           |              |                                                             |   |   |   |   |   |   |   |   |   |             |         |     |              |
|-----------|--------------|-------------------------------------------------------------|---|---|---|---|---|---|---|---|---|-------------|---------|-----|--------------|
| PRR14L    | NM_173566    | proline rich 14-like                                        | 1 | 0 | 1 | 0 | 0 | 0 | 0 | 0 | 0 | hsa-miR-622 | > -0.02 | N/A | Sites in UTR |
| C17orf103 | NM_152914    | chromosome 17 open reading frame 103                        | 0 | 0 | 0 | 0 | 1 | 0 | 1 | 0 | 0 | hsa-miR-622 | > -0.02 | N/A | Sites in UTR |
| KIAA0284  | NM_001112726 | KIAA0284                                                    | 0 | 0 | 0 | 0 | 1 | 0 | 1 | 0 | 0 | hsa-miR-622 | > -0.02 | N/A | Sites in UTR |
| GDPD1     | NM_182569    | glycerophosphodiester phosphodiesterase domain containing 1 | 0 | 0 | 0 | 0 | 1 | 0 | 1 | 0 | 0 | hsa-miR-622 | > -0.02 | N/A | Sites in UTR |
| DOK7      | NM_001164673 | docking protein 7                                           | 0 | 0 | 0 | 0 | 1 | 0 | 1 | 0 | 0 | hsa-miR-622 | > -0.02 | N/A | Sites in UTR |
| NAT8L     | NM_178557    | N-acetyltransferase 8-like (GCN5-related, putative)         | 0 | 0 | 0 | 0 | 1 | 0 | 1 | 0 | 0 | hsa-miR-622 | > -0.02 | N/A | Sites in UTR |
| C15orf52  | NM_207380    | chromosome 15 open reading frame 52                         | 0 | 0 | 0 | 0 | 1 | 0 | 1 | 0 | 0 | hsa-miR-622 | > -0.02 | N/A | Sites in UTR |
| IYD       | NM_001164694 | iodotyrosine deiodinase                                     | 0 | 0 | 0 | 0 | 1 | 0 | 1 | 0 | 0 | hsa-miR-622 | > -0.02 | N/A | Sites in UTR |
| C3orf72   | NM_001040061 | chromosome 3 open reading frame 72                          | 0 | 0 | 0 | 0 | 1 | 0 | 1 | 0 | 0 | hsa-miR-622 | > -0.02 | N/A | Sites in UTR |
| ZNF716    | NM_001159279 | zinc finger protein 716                                     | 0 | 0 | 0 | 0 | 1 | 0 | 1 | 0 | 0 | hsa-miR-622 | > -0.02 | N/A | Sites in UTR |
| RNF165    | NM_152470    | ring finger protein 165                                     | 0 | 0 | 0 | 0 | 1 | 0 | 1 | 0 | 0 | hsa-miR-622 | > -0.02 | N/A | Sites in UTR |
| POTEM     | NM_001145442 | POTE ankyrin domain family, member M                        | 0 | 0 | 0 | 0 | 1 | 0 | 1 | 0 | 0 | hsa-miR-622 | > -0.02 | N/A | Sites in UTR |
| TMEM236   | NM_001098844 | transmembrane protein 236                                   | 0 | 0 | 0 | 0 | 1 | 0 | 1 | 0 | 0 | hsa-miR-622 | > -0.02 | N/A | Sites in UTR |
| SLC35E2B  | NM_001110781 | solute carrier family 35, member E2B                        | 0 | 0 | 0 | 0 | 1 | 0 | 1 | 0 | 0 | hsa-miR-622 | > -0.02 | N/A | Sites in UTR |
| SHISA9    | NM_001145204 | shisa homolog 9 (Xenopus laevis)                            | 0 | 0 | 0 | 0 | 1 | 0 | 1 | 0 | 0 | hsa-miR-622 | > -0.02 | N/A | Sites in UTR |
| CYLD      | NM_001042355 | cyldromatosis (turban tumor syndrome)                       | 0 | 0 | 0 | 0 | 2 | 0 | 0 | 2 | 0 | hsa-miR-622 | > -0.02 | N/A | Sites in UTR |
| IGFBP5    | NM_000599    | insulin-like growth factor binding protein 5                | 1 | 0 | 0 | 1 | 1 | 0 | 0 | 1 | 0 | hsa-miR-622 | > -0.02 | N/A | Sites in UTR |
| RAB3B     | NM_002867    | RAB3B, member RAS oncogene family                           | 0 | 0 | 0 | 0 | 2 | 0 | 0 | 2 | 0 | hsa-miR-622 | > -0.02 | N/A | Sites in UTR |

|           |              |                                                                               |   |   |   |   |   |   |   |   |             |         |     |              |
|-----------|--------------|-------------------------------------------------------------------------------|---|---|---|---|---|---|---|---|-------------|---------|-----|--------------|
| SLC1A2    | NM_001195728 | solute carrier family 1 (glial high affinity glutamate transporter), member 2 | 0 | 0 | 0 | 0 | 2 | 0 | 0 | 2 | hsa-miR-622 | > -0.02 | N/A | Sites in UTR |
| UBE2G2    | NM_001202489 | ubiquitin-conjugating enzyme E2G 2                                            | 0 | 0 | 0 | 0 | 2 | 0 | 0 | 2 | hsa-miR-622 | > -0.02 | N/A | Sites in UTR |
| RAB7L1    | NM_001135662 | RAB7, member RAS oncogene family-like 1                                       | 0 | 0 | 0 | 0 | 2 | 0 | 0 | 2 | hsa-miR-622 | > -0.02 | N/A | Sites in UTR |
| KIF1C     | NM_006612    | kinesin family member 1C                                                      | 0 | 0 | 0 | 0 | 2 | 0 | 0 | 2 | hsa-miR-622 | > -0.02 | N/A | Sites in UTR |
| MID2      | NM_012216    | midline 2                                                                     | 0 | 0 | 0 | 0 | 2 | 0 | 0 | 2 | hsa-miR-622 | > -0.02 | N/A | Sites in UTR |
| TMOD2     | NM_001142885 | tropomodulin 2 (neuronal)                                                     | 0 | 0 | 0 | 0 | 2 | 0 | 0 | 2 | hsa-miR-622 | > -0.02 | N/A | Sites in UTR |
| TRPM7     | NM_017672    | transient receptor potential cation channel, subfamily M, member 7            | 0 | 0 | 0 | 0 | 2 | 0 | 0 | 2 | hsa-miR-622 | > -0.02 | N/A | Sites in UTR |
| ACER3     | NM_018367    | alkaline ceramidase 3                                                         | 0 | 0 | 0 | 0 | 2 | 0 | 0 | 2 | hsa-miR-622 | > -0.02 | N/A | Sites in UTR |
| SCN3B     | NM_001040151 | sodium channel, voltage-gated, type III, beta                                 | 0 | 0 | 0 | 0 | 2 | 0 | 0 | 2 | hsa-miR-622 | > -0.02 | N/A | Sites in UTR |
| RAD18     | NM_020165    | RAD18 homolog ( <i>S. cerevisiae</i> )                                        | 0 | 0 | 0 | 0 | 2 | 0 | 0 | 2 | hsa-miR-622 | > -0.02 | N/A | Sites in UTR |
| CYP20A1   | NM_177538    | cytochrome P450, family 20, subfamily A, polypeptide 1                        | 0 | 0 | 0 | 0 | 2 | 0 | 0 | 2 | hsa-miR-622 | > -0.02 | N/A | Sites in UTR |
| EPG5      | NM_020964    | ectopic P-granules autophagy protein 5 homolog ( <i>C. elegans</i> )          | 0 | 0 | 0 | 0 | 2 | 0 | 0 | 2 | hsa-miR-622 | > -0.02 | N/A | Sites in UTR |
| PEAK1     | NM_024776    | NKF3 kinase family member                                                     | 0 | 0 | 0 | 0 | 2 | 0 | 0 | 2 | hsa-miR-622 | > -0.02 | N/A | Sites in UTR |
| TREML2    | NM_024807    | triggering receptor expressed on myeloid cells-like 2                         | 0 | 0 | 0 | 0 | 2 | 0 | 0 | 2 | hsa-miR-622 | > -0.02 | N/A | Sites in UTR |
| ANKRD13C  | NM_030816    | ankyrin repeat domain 13C                                                     | 0 | 0 | 0 | 0 | 2 | 0 | 0 | 2 | hsa-miR-622 | > -0.02 | N/A | Sites in UTR |
| RAB11FIP4 | NM_032932    | RAB11 family interacting protein 4 (class II)                                 | 0 | 0 | 0 | 0 | 2 | 0 | 0 | 2 | hsa-miR-622 | > -0.02 | N/A | Sites in UTR |
| ST6GAL2   | NM_001142351 | ST6 beta-galactosamide alpha-2,6-sialyltransferase 2                          | 0 | 0 | 0 | 0 | 2 | 0 | 0 | 2 | hsa-miR-622 | > -0.02 | N/A | Sites in UTR |
| SESTD1    | NM_178123    | SEC14 and spectrin domains 1                                                  | 0 | 0 | 0 | 0 | 2 | 0 | 0 | 2 | hsa-miR-622 | > -0.02 | N/A | Sites in UTR |

|         |              |                                                                           |   |   |   |   |   |   |   |   |             |         |     |              |
|---------|--------------|---------------------------------------------------------------------------|---|---|---|---|---|---|---|---|-------------|---------|-----|--------------|
| PALM2   | NM_001037293 | paralemmin 2                                                              | 0 | 0 | 0 | 0 | 2 | 0 | 0 | 2 | hsa-miR-622 | > -0.02 | N/A | Sites in UTR |
| SLC30A7 | NM_001144884 | solute carrier family 30 (zinc transporter), member 7                     | 0 | 0 | 0 | 0 | 2 | 0 | 0 | 2 | hsa-miR-622 | > -0.02 | N/A | Sites in UTR |
| CLYBL   | NM_206808    | citrate lyase beta like                                                   | 0 | 0 | 0 | 0 | 2 | 0 | 0 | 2 | hsa-miR-622 | > -0.02 | N/A | Sites in UTR |
| ANKRD52 | NM_173595    | ankyrin repeat domain 52                                                  | 0 | 0 | 0 | 0 | 2 | 0 | 0 | 2 | hsa-miR-622 | > -0.02 | N/A | Sites in UTR |
| ZNF470  | NM_001001668 | zinc finger protein 470                                                   | 0 | 0 | 0 | 0 | 2 | 0 | 0 | 2 | hsa-miR-622 | > -0.02 | N/A | Sites in UTR |
| AP1G1   | NM_001030007 | adaptor-related protein complex 1, gamma 1 subunit                        | 0 | 0 | 0 | 0 | 1 | 1 | 0 | 0 | hsa-miR-622 | > -0.03 | N/A | Sites in UTR |
| NOTCH2  | NM_024408    | notch 2                                                                   | 0 | 0 | 0 | 0 | 1 | 1 | 0 | 0 | hsa-miR-622 | > -0.03 | N/A | Sites in UTR |
| RPS6KA2 | NM_001006932 | ribosomal protein S6 kinase, 90kDa, polypeptide 2                         | 0 | 0 | 0 | 0 | 1 | 1 | 0 | 0 | hsa-miR-622 | > -0.03 | N/A | Sites in UTR |
| SLC6A6  | NM_001134367 | solute carrier family 6 (neurotransmitter transporter, taurine), member 6 | 0 | 0 | 0 | 0 | 1 | 1 | 0 | 0 | hsa-miR-622 | > -0.03 | N/A | Sites in UTR |
| USH2A   | NM_206933    | Usher syndrome 2A (autosomal recessive, mild)                             | 0 | 0 | 0 | 0 | 1 | 1 | 0 | 0 | hsa-miR-622 | > -0.03 | N/A | Sites in UTR |
| PIP4K2B | NM_003559    | phosphatidylinositol-5-phosphate 4-kinase, type II, beta                  | 0 | 0 | 0 | 0 | 1 | 1 | 0 | 0 | hsa-miR-622 | > -0.03 | N/A | Sites in UTR |
| CREB5   | NM_001011666 | cAMP responsive element binding protein 5                                 | 0 | 0 | 0 | 0 | 1 | 1 | 0 | 0 | hsa-miR-622 | > -0.03 | N/A | Sites in UTR |
| SPIN1   | NM_006717    | spindlin 1                                                                | 0 | 0 | 0 | 0 | 1 | 1 | 0 | 0 | hsa-miR-622 | > -0.03 | N/A | Sites in UTR |
| SZT2    | NM_015284    | seizure threshold 2 homolog (mouse)                                       | 0 | 0 | 0 | 0 | 1 | 1 | 0 | 0 | hsa-miR-622 | > -0.03 | N/A | Sites in UTR |
| ZNF629  | NM_001080417 | zinc finger protein 629                                                   | 0 | 0 | 0 | 0 | 1 | 1 | 0 | 0 | hsa-miR-622 | > -0.03 | N/A | Sites in UTR |
| ZDHHC17 | NM_015336    | zinc finger, DHHC-type containing 17                                      | 0 | 0 | 0 | 0 | 1 | 1 | 0 | 0 | hsa-miR-622 | > -0.03 | N/A | Sites in UTR |
| CCDC113 | NM_001142302 | coiled-coil domain containing 113                                         | 0 | 0 | 0 | 0 | 1 | 1 | 0 | 0 | hsa-miR-622 | > -0.03 | N/A | Sites in UTR |
| TET2    | NM_001127208 | tet oncogene family member 2                                              | 1 | 1 | 0 | 0 | 0 | 0 | 0 | 0 | hsa-miR-622 | > -0.03 | N/A | Sites in UTR |

|          |              |                                                                       |   |   |   |   |   |   |   |   |             |         |     |              |
|----------|--------------|-----------------------------------------------------------------------|---|---|---|---|---|---|---|---|-------------|---------|-----|--------------|
| C20orf11 | NM_017896    | chromosome 20 open reading frame 11                                   | 0 | 0 | 0 | 0 | 1 | 1 | 0 | 0 | hsa-miR-622 | > -0.03 | N/A | Sites in UTR |
| TRERF1   | NM_033502    | transcriptional regulating factor 1                                   | 0 | 0 | 0 | 0 | 1 | 1 | 0 | 0 | hsa-miR-622 | > -0.03 | N/A | Sites in UTR |
| PDP2     | NM_020786    | pyruvate dehydrogenase phosphatase catalytic subunit 2                | 0 | 0 | 0 | 0 | 1 | 1 | 0 | 0 | hsa-miR-622 | > -0.03 | N/A | Sites in UTR |
| NECAB1   | NM_022351    | N-terminal EF-hand calcium binding protein 1                          | 0 | 0 | 0 | 0 | 1 | 1 | 0 | 0 | hsa-miR-622 | > -0.03 | N/A | Sites in UTR |
| NFAM1    | NM_145912    | NFAT activating protein with ITAM motif 1                             | 0 | 0 | 0 | 0 | 1 | 1 | 0 | 0 | hsa-miR-622 | > -0.03 | N/A | Sites in UTR |
| SLC36A1  | NM_078483    | solute carrier family 36 (proton/amino acid symporter), member 1      | 0 | 0 | 0 | 0 | 1 | 1 | 0 | 0 | hsa-miR-622 | > -0.03 | N/A | Sites in UTR |
| RBM20    | NM_001134363 | RNA binding motif protein 20                                          | 0 | 0 | 0 | 0 | 1 | 1 | 0 | 0 | hsa-miR-622 | > -0.03 | N/A | Sites in UTR |
| KY       | NM_178554    | kyphoscoliosis peptidase                                              | 0 | 0 | 0 | 0 | 1 | 1 | 0 | 0 | hsa-miR-622 | > -0.03 | N/A | Sites in UTR |
| ABLIM1   | NM_001003407 | actin binding LIM protein 1                                           | 0 | 0 | 0 | 0 | 2 | 0 | 1 | 1 | hsa-miR-622 | > -0.03 | N/A | Sites in UTR |
| LMX1B    | NM_001174146 | LIM homeobox transcription factor 1, beta                             | 0 | 0 | 0 | 0 | 2 | 0 | 1 | 1 | hsa-miR-622 | > -0.03 | N/A | Sites in UTR |
| NOS1     | NM_000620    | nitric oxide synthase 1 (neuronal)                                    | 0 | 0 | 0 | 0 | 2 | 0 | 1 | 1 | hsa-miR-622 | > -0.03 | N/A | Sites in UTR |
| TMPO     | NM_001032283 | thymopoietin                                                          | 0 | 0 | 0 | 0 | 2 | 0 | 1 | 1 | hsa-miR-622 | > -0.03 | N/A | Sites in UTR |
| RAPGEF3  | NM_001098531 | Rap guanine nucleotide exchange factor (GEF) 3                        | 0 | 0 | 0 | 0 | 2 | 0 | 1 | 1 | hsa-miR-622 | > -0.03 | N/A | Sites in UTR |
| UNC13A   | NM_001080421 | unc-13 homolog A (C. elegans)                                         | 0 | 0 | 0 | 0 | 2 | 0 | 1 | 1 | hsa-miR-622 | > -0.03 | N/A | Sites in UTR |
| TANC2    | NM_025185    | tetratricopeptide repeat, ankyrin repeat and coiled-coil containing 2 | 1 | 0 | 1 | 0 | 1 | 0 | 0 | 1 | hsa-miR-622 | > -0.03 | N/A | Sites in UTR |
| TFCP2L1  | NM_014553    | transcription factor CP2-like 1                                       | 0 | 0 | 0 | 0 | 2 | 0 | 1 | 1 | hsa-miR-622 | > -0.03 | N/A | Sites in UTR |
| NAA38    | NM_016200    | N(alpha)-acetyltransferase 38, NatC auxiliary subunit                 | 0 | 0 | 0 | 0 | 2 | 0 | 1 | 1 | hsa-miR-622 | > -0.03 | N/A | Sites in UTR |
| CYCS     | NM_018947    | cytochrome c, somatic                                                 | 0 | 0 | 0 | 0 | 2 | 0 | 1 | 1 | hsa-miR-622 | > -0.03 | N/A | Sites in UTR |

|            |              |                                                                          |   |   |   |   |   |   |   |   |             |         |     |              |
|------------|--------------|--------------------------------------------------------------------------|---|---|---|---|---|---|---|---|-------------|---------|-----|--------------|
| PLEKHB2    | NM_001100623 | pleckstrin homology domain containing, family B (evectins) member 2      | 0 | 0 | 0 | 0 | 2 | 0 | 1 | 1 | hsa-miR-622 | > -0.03 | N/A | Sites in UTR |
| PDPR       | NM_017990    | pyruvate dehydrogenase phosphatase regulatory subunit                    | 0 | 0 | 0 | 0 | 2 | 0 | 1 | 1 | hsa-miR-622 | > -0.03 | N/A | Sites in UTR |
| ZNF490     | NM_020714    | zinc finger protein 490                                                  | 0 | 0 | 0 | 0 | 2 | 0 | 1 | 1 | hsa-miR-622 | > -0.03 | N/A | Sites in UTR |
| NUFIP2     | NM_020772    | nuclear fragile X mental retardation protein interacting protein 2       | 2 | 0 | 1 | 1 | 1 | 0 | 1 | 0 | hsa-miR-622 | > -0.03 | N/A | Sites in UTR |
| ZMAT3      | NM_022470    | zinc finger, matrin-type 3                                               | 0 | 0 | 0 | 0 | 2 | 0 | 1 | 1 | hsa-miR-622 | > -0.03 | N/A | Sites in UTR |
| ZXDC       | NM_001040653 | ZXD family zinc finger C                                                 | 0 | 0 | 0 | 0 | 2 | 0 | 1 | 1 | hsa-miR-622 | > -0.03 | N/A | Sites in UTR |
| ORAI2      | NM_001126340 | ORAI calcium release-activated calcium modulator 2                       | 0 | 0 | 0 | 0 | 2 | 0 | 1 | 1 | hsa-miR-622 | > -0.03 | N/A | Sites in UTR |
| SLC38A1    | NM_001077484 | solute carrier family 38, member 1                                       | 0 | 0 | 0 | 0 | 2 | 0 | 1 | 1 | hsa-miR-622 | > -0.03 | N/A | Sites in UTR |
| KLHL6      | NM_130446    | kelch-like 6 (Drosophila)                                                | 0 | 0 | 0 | 0 | 2 | 0 | 1 | 1 | hsa-miR-622 | > -0.03 | N/A | Sites in UTR |
| SLFN13     | NM_144682    | schlafen family member 13                                                | 0 | 0 | 0 | 0 | 2 | 0 | 1 | 1 | hsa-miR-622 | > -0.03 | N/A | Sites in UTR |
| DENND5B    | NM_144973    | DENN/MADD domain containing 5B                                           | 0 | 0 | 0 | 0 | 2 | 0 | 1 | 1 | hsa-miR-622 | > -0.03 | N/A | Sites in UTR |
| ZNF780B    | NM_001005851 | zinc finger protein 780B                                                 | 0 | 0 | 0 | 0 | 2 | 0 | 1 | 1 | hsa-miR-622 | > -0.03 | N/A | Sites in UTR |
| P2RY8      | NM_178129    | purinergic receptor P2Y, G-protein coupled, 8                            | 0 | 0 | 0 | 0 | 2 | 0 | 1 | 1 | hsa-miR-622 | > -0.03 | N/A | Sites in UTR |
| RAB43      | NM_001204883 | RAB43, member RAS oncogene family                                        | 0 | 0 | 0 | 0 | 2 | 0 | 1 | 1 | hsa-miR-622 | > -0.03 | N/A | Sites in UTR |
| PTAR1      | NM_001099666 | protein prenyltransferase alpha subunit repeat containing 1              | 0 | 0 | 0 | 0 | 2 | 0 | 1 | 1 | hsa-miR-622 | > -0.03 | N/A | Sites in UTR |
| ISY1-RAB43 | NM_001204890 | ISY1-RAB43 readthrough                                                   | 0 | 0 | 0 | 0 | 2 | 0 | 1 | 1 | hsa-miR-622 | > -0.03 | N/A | Sites in UTR |
| TOMM70A    | NM_014820    | translocase of outer mitochondrial membrane 70 homolog A (S. cerevisiae) | 0 | 0 | 0 | 0 | 2 | 1 | 0 | 1 | hsa-miR-622 | > -0.03 | N/A | Sites in UTR |
| ARL3       | NM_004311    | ADP-ribosylation factor-like 3                                           | 0 | 0 | 0 | 0 | 2 | 1 | 0 | 1 | hsa-miR-622 | > -0.04 | N/A | Sites in UTR |

|          |              |                                                          |   |   |   |   |   |   |   |   |             |         |     |              |
|----------|--------------|----------------------------------------------------------|---|---|---|---|---|---|---|---|-------------|---------|-----|--------------|
| DCX      | NM_000555    | doublecortin                                             | 0 | 0 | 0 | 0 | 2 | 0 | 2 | 0 | hsa-miR-622 | > -0.04 | N/A | Sites in UTR |
| ELK4     | NM_001973    | ELK4, ETS-domain protein (SRF accessory protein 1)       | 0 | 0 | 0 | 0 | 2 | 1 | 0 | 1 | hsa-miR-622 | > -0.04 | N/A | Sites in UTR |
| RBMS2    | NM_002898    | RNA binding motif, single stranded interacting protein 2 | 0 | 0 | 0 | 0 | 2 | 0 | 2 | 0 | hsa-miR-622 | > -0.04 | N/A | Sites in UTR |
| TNNI1    | NM_003281    | troponin I type 1 (skeletal, slow)                       | 0 | 0 | 0 | 0 | 2 | 0 | 2 | 0 | hsa-miR-622 | > -0.04 | N/A | Sites in UTR |
| SH3PXD2A | NM_014631    | SH3 and PX domains 2A                                    | 0 | 0 | 0 | 0 | 2 | 0 | 2 | 0 | hsa-miR-622 | > -0.04 | N/A | Sites in UTR |
| ZBTB40   | NM_001083621 | zinc finger and BTB domain containing 40                 | 0 | 0 | 0 | 0 | 2 | 0 | 2 | 0 | hsa-miR-622 | > -0.04 | N/A | Sites in UTR |
| SEC23IP  | NM_007190    | SEC23 interacting protein                                | 0 | 0 | 0 | 0 | 2 | 0 | 2 | 0 | hsa-miR-622 | > -0.04 | N/A | Sites in UTR |
| KLHL18   | NM_025010    | kelch-like 18 (Drosophila)                               | 0 | 0 | 0 | 0 | 2 | 1 | 0 | 1 | hsa-miR-622 | > -0.04 | N/A | Sites in UTR |
| ODZ4     | NM_001098816 | odz, odd Oz/ten-m homolog 4 (Drosophila)                 | 0 | 0 | 0 | 0 | 2 | 0 | 2 | 0 | hsa-miR-622 | > -0.04 | N/A | Sites in UTR |
| MCTS1    | NM_001137554 | malignant T cell amplified sequence 1                    | 0 | 0 | 0 | 0 | 2 | 0 | 2 | 0 | hsa-miR-622 | > -0.04 | N/A | Sites in UTR |
| CSNK1G1  | NM_022048    | casein kinase 1, gamma 1                                 | 0 | 0 | 0 | 0 | 2 | 0 | 2 | 0 | hsa-miR-622 | > -0.04 | N/A | Sites in UTR |
| ZNF471   | NM_020813    | zinc finger protein 471                                  | 0 | 0 | 0 | 0 | 2 | 0 | 2 | 0 | hsa-miR-622 | > -0.04 | N/A | Sites in UTR |
| CLSPN    | NM_001190481 | claspin                                                  | 0 | 0 | 0 | 0 | 2 | 1 | 0 | 1 | hsa-miR-622 | > -0.04 | N/A | Sites in UTR |
| C22orf29 | NM_024627    | chromosome 22 open reading frame 29                      | 0 | 0 | 0 | 0 | 2 | 0 | 2 | 0 | hsa-miR-622 | > -0.04 | N/A | Sites in UTR |
| ING5     | NM_032329    | inhibitor of growth family, member 5                     | 0 | 0 | 0 | 0 | 2 | 0 | 2 | 0 | hsa-miR-622 | > -0.04 | N/A | Sites in UTR |
| CBX2     | NM_005189    | chromobox homolog 2                                      | 0 | 0 | 0 | 0 | 2 | 0 | 2 | 0 | hsa-miR-622 | > -0.04 | N/A | Sites in UTR |
| OLFML2A  | NM_182487    | olfactomedin-like 2A                                     | 0 | 0 | 0 | 0 | 2 | 0 | 2 | 0 | hsa-miR-622 | > -0.04 | N/A | Sites in UTR |
| GK5      | NM_001039547 | glycerol kinase 5 (putative)                             | 0 | 0 | 0 | 0 | 2 | 0 | 2 | 0 | hsa-miR-622 | > -0.04 | N/A | Sites in UTR |

|           |              |                                                                                |   |   |   |   |   |   |   |   |             |         |     |              |
|-----------|--------------|--------------------------------------------------------------------------------|---|---|---|---|---|---|---|---|-------------|---------|-----|--------------|
| TSPAN11   | NM_001080509 | tetraspanin 11                                                                 | 0 | 0 | 0 | 0 | 2 | 0 | 2 | 0 | hsa-miR-622 | > -0.04 | N/A | Sites in UTR |
| PPM1A     | NM_021003    | protein phosphatase, Mg2+/Mn2+ dependent, 1A                                   | 0 | 0 | 0 | 0 | 3 | 0 | 1 | 2 | hsa-miR-622 | > -0.04 | N/A | Sites in UTR |
| MAVS      | NM_001206491 | mitochondrial antiviral signaling protein                                      | 0 | 0 | 0 | 0 | 3 | 0 | 1 | 2 | hsa-miR-622 | > -0.04 | N/A | Sites in UTR |
| STX11     | NM_003764    | syntaxin 11                                                                    | 0 | 0 | 0 | 0 | 2 | 1 | 1 | 0 | hsa-miR-622 | > -0.05 | N/A | Sites in UTR |
| ZNF264    | NM_003417    | zinc finger protein 264                                                        | 0 | 0 | 0 | 0 | 2 | 1 | 1 | 0 | hsa-miR-622 | > -0.05 | N/A | Sites in UTR |
| PTPN18    | NM_001142370 | protein tyrosine phosphatase, non-receptor type 18 (brain-derived)             | 0 | 0 | 0 | 0 | 2 | 1 | 1 | 0 | hsa-miR-622 | > -0.05 | N/A | Sites in UTR |
| GDAP2     | NM_017686    | ganglioside induced differentiation associated protein 2                       | 0 | 0 | 0 | 0 | 2 | 1 | 1 | 0 | hsa-miR-622 | > -0.05 | N/A | Sites in UTR |
| PAQR5     | NM_001104554 | progesterin and adipoQ receptor family member V                                | 0 | 0 | 0 | 0 | 2 | 1 | 1 | 0 | hsa-miR-622 | > -0.05 | N/A | Sites in UTR |
| PGPEP1    | NM_017712    | pyroglutamyl-peptidase I                                                       | 0 | 0 | 0 | 0 | 2 | 1 | 1 | 0 | hsa-miR-622 | > -0.05 | N/A | Sites in UTR |
| PLXNA4    | NM_020911    | plexin A4                                                                      | 0 | 0 | 0 | 0 | 2 | 1 | 1 | 0 | hsa-miR-622 | > -0.05 | N/A | Sites in UTR |
| ABHD2     | NM_007011    | abhydrolase domain containing 2                                                | 0 | 0 | 0 | 0 | 3 | 0 | 2 | 1 | hsa-miR-622 | > -0.05 | N/A | Sites in UTR |
| IPO9      | NM_018085    | importin 9                                                                     | 0 | 0 | 0 | 0 | 3 | 1 | 0 | 2 | hsa-miR-622 | > -0.05 | N/A | Sites in UTR |
| SSH2      | NM_033389    | slingshot homolog 2 (Drosophila)                                               | 0 | 0 | 0 | 0 | 3 | 0 | 2 | 1 | hsa-miR-622 | > -0.05 | N/A | Sites in UTR |
| LOC646851 | NM_001013647 | hypothetical LOC646851                                                         | 0 | 0 | 0 | 0 | 3 | 0 | 2 | 1 | hsa-miR-622 | > -0.05 | N/A | Sites in UTR |
| ANTXR2    | NM_058172    | anthrax toxin receptor 2                                                       | 0 | 0 | 0 | 0 | 4 | 0 | 1 | 3 | hsa-miR-622 | > -0.05 | N/A | Sites in UTR |
| PLEKHG4B  | NM_052909    | pleckstrin homology domain containing, family G (with RhoGef domain) member 4B | 0 | 0 | 0 | 0 | 4 | 0 | 1 | 3 | hsa-miR-622 | > -0.05 | N/A | Sites in UTR |
| NFIA      | NM_001134673 | nuclear factor I/A                                                             | 0 | 0 | 0 | 0 | 3 | 1 | 1 | 1 | hsa-miR-622 | > -0.06 | N/A | Sites in UTR |
| WWC1      | NM_001161661 | WW and C2 domain containing 1                                                  | 0 | 0 | 0 | 0 | 3 | 0 | 3 | 0 | hsa-miR-622 | > -0.06 | N/A | Sites in UTR |



|              |              |                                                                             |   |   |   |   |   |   |   |   |             |         |     |              |
|--------------|--------------|-----------------------------------------------------------------------------|---|---|---|---|---|---|---|---|-------------|---------|-----|--------------|
| ZNF704       | NM_001033723 | zinc finger protein 704                                                     | 0 | 0 | 0 | 0 | 3 | 1 | 1 | 1 | hsa-miR-622 | > -0.06 | N/A | Sites in UTR |
| LOC100507421 | NM_001195278 | transmembrane protein 178-like                                              | 0 | 0 | 0 | 0 | 4 | 0 | 2 | 2 | hsa-miR-622 | > -0.06 | N/A | Sites in UTR |
| ACVR2B       | NM_001106    | activin A receptor, type IIB                                                | 0 | 0 | 0 | 0 | 3 | 1 | 2 | 0 | hsa-miR-622 | > -0.07 | N/A | Sites in UTR |
| PTPN14       | NM_005401    | protein tyrosine phosphatase, non-receptor type 14                          | 0 | 0 | 0 | 0 | 3 | 1 | 2 | 0 | hsa-miR-622 | > -0.07 | N/A | Sites in UTR |
| HEYL         | NM_014571    | hairy/enhancer-of-split related with YRPW motif-like                        | 1 | 0 | 1 | 0 | 2 | 1 | 1 | 0 | hsa-miR-622 | > -0.07 | N/A | Sites in UTR |
| KLF12        | NM_007249    | Kruppel-like factor 12                                                      | 1 | 1 | 0 | 0 | 3 | 0 | 1 | 2 | hsa-miR-622 | > -0.07 | N/A | Sites in UTR |
| PLEKHA6      | NM_014935    | pleckstrin homology domain containing, family A member 6                    | 0 | 0 | 0 | 0 | 4 | 0 | 3 | 1 | hsa-miR-622 | > -0.07 | N/A | Sites in UTR |
| CACNG8       | NM_031895    | calcium channel, voltage-dependent, gamma subunit 8                         | 0 | 0 | 0 | 0 | 5 | 1 | 0 | 4 | hsa-miR-622 | > -0.07 | N/A | Sites in UTR |
| C6orf223     | NM_001171992 | chromosome 6 open reading frame 223                                         | 3 | 1 | 2 | 0 | 6 | 0 | 6 | 0 | hsa-miR-622 | > -0.19 | N/A | Sites in UTR |
| CHD4         | NM_001273    | chromodomain helicase DNA binding protein 4                                 | 0 | 0 | 0 | 0 | 1 | 1 | 0 | 0 | hsa-miR-622 | N/A     | N/A | Sites in UTR |
| FOXP1        | NM_005249    | forkhead box G1                                                             | 0 | 0 | 0 | 0 | 1 | 0 | 1 | 0 | hsa-miR-622 | N/A     | N/A | Sites in UTR |
| GUSB         | NM_000181    | glucuronidase, beta                                                         | 0 | 0 | 0 | 0 | 1 | 0 | 0 | 1 | hsa-miR-622 | N/A     | N/A | Sites in UTR |
| SP110        | NM_004509    | SP110 nuclear body protein                                                  | 0 | 0 | 0 | 0 | 1 | 0 | 0 | 1 | hsa-miR-622 | N/A     | N/A | Sites in UTR |
| IL7R         | NM_002185    | interleukin 7 receptor                                                      | 0 | 0 | 0 | 0 | 1 | 1 | 0 | 0 | hsa-miR-622 | N/A     | N/A | Sites in UTR |
| ITK          | NM_005546    | IL2-inducible T-cell kinase                                                 | 0 | 0 | 0 | 0 | 1 | 0 | 0 | 1 | hsa-miR-622 | N/A     | N/A | Sites in UTR |
| KCNA5        | NM_002234    | potassium voltage-gated channel, shaker-related subfamily, member 5         | 0 | 0 | 0 | 0 | 1 | 0 | 1 | 0 | hsa-miR-622 | N/A     | N/A | Sites in UTR |
| PFN2         | NM_053024    | profilin 2                                                                  | 1 | 0 | 1 | 0 | 0 | 0 | 0 | 0 | hsa-miR-622 | N/A     | N/A | Sites in UTR |
| PIN4         | NM_006223    | protein (peptidylprolyl cis/trans isomerase) NIMA-interacting, 4 (parvulin) | 1 | 0 | 0 | 1 | 0 | 0 | 0 | 0 | hsa-miR-622 | N/A     | N/A | Sites in UTR |

|            |              |                                                                                                               |   |   |   |   |   |   |   |   |             |     |     |              |
|------------|--------------|---------------------------------------------------------------------------------------------------------------|---|---|---|---|---|---|---|---|-------------|-----|-----|--------------|
| SEMA3B     | NM_001005914 | sema domain, immunoglobulin domain (Ig), short basic domain, secreted, (semaphorin) 3B                        | 0 | 0 | 0 | 0 | 1 | 0 | 1 | 0 | hsa-miR-622 | N/A | N/A | Sites in UTR |
| REEP5      | NM_005669    | receptor accessory protein 5                                                                                  | 0 | 0 | 0 | 0 | 1 | 0 | 1 | 0 | hsa-miR-622 | N/A | N/A | Sites in UTR |
| CREG1      | NM_003851    | cellular repressor of E1A-stimulated genes 1                                                                  | 0 | 0 | 0 | 0 | 1 | 0 | 1 | 0 | hsa-miR-622 | N/A | N/A | Sites in UTR |
| HTR3B      | NM_006028    | 5-hydroxytryptamine (serotonin) receptor 3B                                                                   | 0 | 0 | 0 | 0 | 1 | 0 | 0 | 1 | hsa-miR-622 | N/A | N/A | Sites in UTR |
| MED23      | NM_004830    | mediator complex subunit 23                                                                                   | 0 | 0 | 0 | 0 | 1 | 0 | 1 | 0 | hsa-miR-622 | N/A | N/A | Sites in UTR |
| PPIH       | NM_006347    | peptidylprolyl isomerase H (cyclophilin H)                                                                    | 0 | 0 | 0 | 0 | 1 | 0 | 0 | 1 | hsa-miR-622 | N/A | N/A | Sites in UTR |
| SYNCRIP    | NM_001159673 | synaptotagmin binding, cytoplasmic RNA interacting protein                                                    | 1 | 0 | 0 | 1 | 0 | 0 | 0 | 0 | hsa-miR-622 | N/A | N/A | Sites in UTR |
| SCGN       | NM_006998    | secretagogin, EF-hand calcium binding protein                                                                 | 0 | 0 | 0 | 0 | 1 | 0 | 1 | 0 | hsa-miR-622 | N/A | N/A | Sites in UTR |
| EPB41L4B   | NM_018424    | erythrocyte membrane protein band 4.1 like 4B                                                                 | 0 | 0 | 0 | 0 | 1 | 0 | 0 | 1 | hsa-miR-622 | N/A | N/A | Sites in UTR |
| ZDHC7      | NM_001145548 | zinc finger, DHHC-type containing 7                                                                           | 0 | 0 | 0 | 0 | 1 | 1 | 0 | 0 | hsa-miR-622 | N/A | N/A | Sites in UTR |
| SLC7A10    | NM_019849    | solute carrier family 7 (neutral amino acid transporter light chain, asc system), member 10                   | 0 | 0 | 0 | 0 | 1 | 0 | 0 | 1 | hsa-miR-622 | N/A | N/A | Sites in UTR |
| NAT14      | NM_020378    | N-acetyltransferase 14 (GCN5-related, putative)                                                               | 0 | 0 | 0 | 0 | 1 | 1 | 0 | 0 | hsa-miR-622 | N/A | N/A | Sites in UTR |
| SH3RF1     | NM_020870    | SH3 domain containing ring finger 1                                                                           | 0 | 0 | 0 | 0 | 1 | 0 | 0 | 1 | hsa-miR-622 | N/A | N/A | Sites in UTR |
| FAM38B     | NM_022068    | family with sequence similarity 38, member B                                                                  | 0 | 0 | 0 | 0 | 1 | 0 | 1 | 0 | hsa-miR-622 | N/A | N/A | Sites in UTR |
| TMC7       | NM_001160364 | transmembrane channel-like 7                                                                                  | 0 | 0 | 0 | 0 | 1 | 0 | 0 | 1 | hsa-miR-622 | N/A | N/A | Sites in UTR |
| ST6GALNAC5 | NM_030965    | ST6 (alpha-N-acetyl-neuraminyl-2,3-beta-galactosyl-1,3)-N-acetylgalactosaminide alpha-2,6-sialyltransferase 5 | 0 | 0 | 0 | 0 | 1 | 0 | 1 | 0 | hsa-miR-622 | N/A | N/A | Sites in UTR |
| FAM167A    | NM_053279    | family with sequence similarity 167, member A                                                                 | 0 | 0 | 0 | 0 | 1 | 0 | 1 | 0 | hsa-miR-622 | N/A | N/A | Sites in UTR |
| RNASE7     | NM_032572    | ribonuclease, RNase A family, 7                                                                               | 0 | 0 | 0 | 0 | 1 | 0 | 1 | 0 | hsa-miR-622 | N/A | N/A | Sites in UTR |

|          |              |                                                    |   |   |   |   |   |   |   |   |   |             |     |     |              |
|----------|--------------|----------------------------------------------------|---|---|---|---|---|---|---|---|---|-------------|-----|-----|--------------|
| TMEM55B  | NM_001100814 | transmembrane protein 55B                          | 1 | 0 | 1 | 0 | 0 | 0 | 0 | 0 | 0 | hsa-miR-622 | N/A | N/A | Sites in UTR |
| UAP1L1   | NM_207309    | UDP-N-acetylglucosamine pyrophosphorylase 1-like 1 | 0 | 0 | 0 | 0 | 1 | 0 | 1 | 0 | 0 | hsa-miR-622 | N/A | N/A | Sites in UTR |
| ADAMTSL1 | NM_052866    | ADAMTS-like 1                                      | 0 | 0 | 0 | 0 | 1 | 0 | 1 | 0 | 0 | hsa-miR-622 | N/A | N/A | Sites in UTR |
| GCFC1    | NM_016631    | GC-rich sequence DNA-binding factor 1              | 0 | 0 | 0 | 0 | 1 | 0 | 0 | 1 | 0 | hsa-miR-622 | N/A | N/A | Sites in UTR |
| ADSSL1   | NM_152328    | adenylosuccinate synthase like 1                   | 0 | 0 | 0 | 0 | 1 | 1 | 0 | 0 | 0 | hsa-miR-622 | N/A | N/A | Sites in UTR |
| KBTBD5   | NM_152393    | kelch repeat and BTB (POZ) domain containing 5     | 0 | 0 | 0 | 0 | 1 | 1 | 0 | 0 | 0 | hsa-miR-622 | N/A | N/A | Sites in UTR |
| LIN54    | NM_001115007 | lin-54 homolog (C. elegans)                        | 0 | 0 | 0 | 0 | 1 | 0 | 0 | 1 | 0 | hsa-miR-622 | N/A | N/A | Sites in UTR |
| NCOA7    | NM_001122842 | nuclear receptor coactivator 7                     | 1 | 0 | 1 | 0 | 0 | 0 | 0 | 0 | 0 | hsa-miR-622 | N/A | N/A | Sites in UTR |
| NOTUM    | NM_178493    | notum pectinacylesterase homolog (Drosophila)      | 0 | 0 | 0 | 0 | 1 | 0 | 1 | 0 | 0 | hsa-miR-622 | N/A | N/A | Sites in UTR |
| FAM78B   | NM_001017961 | family with sequence similarity 78, member B       | 0 | 0 | 0 | 0 | 1 | 0 | 1 | 0 | 0 | hsa-miR-622 | N/A | N/A | Sites in UTR |
| C6orf94  | NM_001013623 | chromosome 6 open reading frame 94                 | 1 | 0 | 1 | 0 | 0 | 0 | 0 | 0 | 0 | hsa-miR-622 | N/A | N/A | Sites in UTR |
| C8orf37  | NM_177965    | chromosome 8 open reading frame 37                 | 0 | 0 | 0 | 0 | 1 | 0 | 1 | 0 | 0 | hsa-miR-622 | N/A | N/A | Sites in UTR |
| ACSF3    | NM_001127214 | acyl-CoA synthetase family member 3                | 0 | 0 | 0 | 0 | 1 | 0 | 1 | 0 | 0 | hsa-miR-622 | N/A | N/A | Sites in UTR |
| TLL6     | NM_001130918 | tubulin tyrosine ligase-like family, member 6      | 1 | 0 | 1 | 0 | 0 | 0 | 0 | 0 | 0 | hsa-miR-622 | N/A | N/A | Sites in UTR |
